# Supplementary material for: Asymmetric synthesis of tetrazole and dihydroisoquinoline derivatives by isocyanide-based multicomponent reactions
Source: PubMed Central journal article supplement (PMC6509109; doi:10.1038/s41467-019-09904-5), 2019-05-09
Supplement: 41467_2019_9904_MOESM1_ESM.pdf [file 41467_2019_9904_MOESM1_ESM.pdf]

## Supplementary Information

# Asymmetric synthesis of tetrazole and dihydroisoquinoline derivatives by isocyanide-based multicomponent reactions

Xiong *et al.*

## Supplementary Method

### General remarks

<sup>1</sup>H NMR spectra were recorded on commercial instruments (400 MHz). Chemical shifts were recorded in ppm relative to tetramethylsilane and with the solvent resonance as the internal standard (CDCl<sub>3</sub>, δ = 7.26). Data were reported as follows: chemical shift, multiplicity (s = singlet, d = doublet, t = triplet, q = quartet, m = multiplet), coupling constants (Hz), integration. <sup>13</sup>C{<sup>1</sup>H} NMR data were collected on commercial instruments (100 MHz) with complete proton decoupling. Chemical shifts were reported in ppm from the tetramethylsilane with the solvent resonance as internal standard (CDCl<sub>3</sub>, δ = 77.16). Enantiomeric excesses were determined by chiral HPLC analysis on Daicel Chiralcel ADH, IA, IB, IC, IE, and Phenomenex Chiralcel Lux 5u Cellulose-2 at 23 °C with UV detector in comparison with the authentic racemates. Optical rotations were determined after flash column chromatography purification and reported as follows: [α]<sub>D</sub><sup>T</sup> (c: g/100 mL, in CH<sub>2</sub>Cl<sub>2</sub>). HRMS were recorded on a commercial apparatus (ESI source). All the reactions were carried out under an atmosphere of nitrogen in over-dried apparatus. All the solvents were purified by usual methods before use. Chromatography: Qingdao Haiyang silica gel, HG/T2354-92, H CP. Reagents purchased from commercial suppliers were used: 2-naphthyl isocyanide (Aldrich), 4-nitrophenyl isocyanide (TCI), 4-methoxyphenyl isocyanide (Aldrich), 2,3-dihydro-6-isocyano-1,4-benzodioxine (Acros), *tert*-butyl isocyanide, magnesium trifluoromethanesulfonate (Alfa), trimethylsilyl azide (TCI). The *N,N'*-dioxide ligands<sup>1-2</sup> and alkylidene malonates<sup>3-4</sup> were synthesized according to known procedures.

### General procedure for the synthesis of racemic product

**General procedure 1:** To an oven-dried tube were added Mg(OTf)<sub>2</sub> (0.014 mmol, 14 mol%), 2-(cyclohexylmethylene)malonate **3a** (0.20 mmol), TMSN<sub>3</sub> **2a** (0.24 mmol), 2-naphthyl isocyanide **1a** (0.20 mmol) and CH<sub>2</sub>ClCH<sub>2</sub>Cl (1.0 mL). The mixture was stirred in CH<sub>2</sub>ClCH<sub>2</sub>Cl at 30 °C for 3 h and directly purified by flash chromatography

on silica gel (eluent: petroleum ether/ethyl acetate = 9/1) to afford the racemic product **5a**. (For 2-benzylidenemalonate **3o**, 0.01 mmol  $\text{NaAr}^{\text{F}}_4$  was added).

**General procedure 2:** To an oven-dried tube under nitrogen atmosphere were added  $\text{Mg}(\text{OTf})_2$  (0.010 mmol, 10 mol%), racemic **RaPr**<sub>2</sub> (0.010 mmol, 10 mol%), dimethyl 2-benzylidenemalonate **3o** (0.10 mmol), 5  $\mu\text{L}$   $\text{H}_2\text{O}$ ,  $\text{TMSN}_3$  **2a** (0.15 mmol) 2-naphthyl isocyanide **1a** (0.10 mmol) and  $\text{CH}_2\text{Cl}_2$  (1.0 mL). The mixture was stirred at 30 °C for 48 h, and directly purified by flash chromatography on silica gel (eluent: petroleum ether/ethyl acetate = 9/1) to afford the racemic product **4o**.

**General procedure 3:** To an oven-dried tube under nitrogen atmosphere were added  $\text{Mg}(\text{OTf})_2$  (0.010 mmol, 10 mol%), racemic **PiPr**<sub>2</sub> (0.015 mmol, 15 mol%), 2-(cyclohexylmethylene)malonate **3a** (0.15 mmol), and 5 Å MS (10 mg). The mixture was stirred in  $\text{CH}_2\text{Cl}_2$  (1.0 mL) at 35 °C for 0.5 h. Subsequently,  $\text{TMSN}_3$  **2a** (0.15 mmol) and 2-naphthyl isocyanide **1a** (0.10 mmol) were added at -40 °C. The mixture was stirred at -40 °C for 2 days then at -20 °C for 3 days, and directly purified by flash chromatography on silica gel (eluent: petroleum ether/ethyl acetate = 9/1) to afford the desired product **4a**.

**General procedure 4:** To an oven-dried tube were added  $\text{Mg}(\text{OTf})_2$  (0.010 mmol, 10 mol%), dimethyl 2-benzylidenemalonate **3o** (0.10 mmol), isoquinoline **7a** (0.10 mmol), *tert*-butyl isocyanide **1e** (0.10 mmol) and  $\text{CH}_2\text{ClCH}_2\text{Cl}$  (0.5 mL). The mixture was stirred in  $\text{CH}_2\text{ClCH}_2\text{Cl}$  (1.0 mL) at 35 °C for 48 h, and directly purified by flash chromatography on silica gel (eluent: petroleum ether/ethyl acetate = 9/1) to afford the racemic product **8a**.

## Typical procedure for the asymmetric reaction

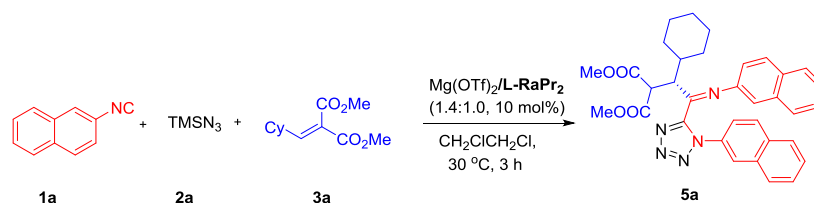

**General procedure 1:** To an oven-dried tube under nitrogen atmosphere were added  $\text{Mg}(\text{OTf})_2$  (0.014 mmol, 14 mol%), **L-RaPr**<sub>2</sub> (0.010 mmol, 10 mol%),

2-(cyclohexylmethylene)malonate **3a** (0.20 mmol) and  $\text{CH}_2\text{ClCH}_2\text{Cl}$  (1.0 mL). The mixture were stirred in  $\text{CH}_2\text{ClCH}_2\text{Cl}$  (1.0 mL) at 35 °C for 0.5 h. Subsequently,  $\text{TMSN}_3$  **2a** (0.24 mmol) and 2-naphthyl isocyanide **1a** (0.20 mmol) were added at 30 °C. The mixture was stirred at 30 °C for 3 h, and directly purified by flash chromatography on silica gel (eluent: petroleum ether/ethyl acetate = 9/1) to afford the desired product **5a** (91% yield, 94.5:5.5 e.r.).

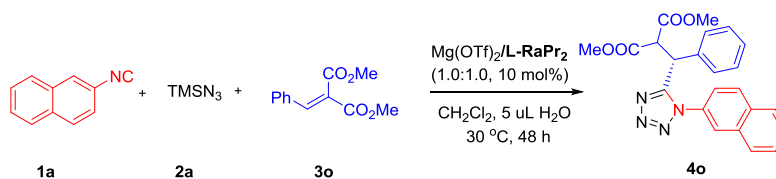

**General procedure 2:** To an oven-dried tube under nitrogen atmosphere were added  $\text{Mg(OTf)}_2$  (0.010 mmol, 10 mol%), **L-RaPr<sub>2</sub>** (0.010 mmol, 10 mol%), dimethyl 2-benzylidenemalonate **3o** (0.10 mmol), 5  $\mu\text{L}$   $\text{H}_2\text{O}$  and  $\text{CH}_2\text{Cl}_2$  (1.0 mL). The mixture was stirred in  $\text{CH}_2\text{Cl}_2$  (1.0 mL) at 35 °C for 0.5 h. Subsequently,  $\text{TMSN}_3$  **2a** (0.15 mmol) and 2-naphthyl isocyanide **1a** (0.10 mmol) were added at 30 °C. The mixture was stirred at 30 °C for 48 h, and directly purified by flash chromatography on silica gel (eluent: petroleum ether/ethyl acetate = 9/1) to afford the desired product **4o** (50% yield, 90.5:9.5 e.r.).

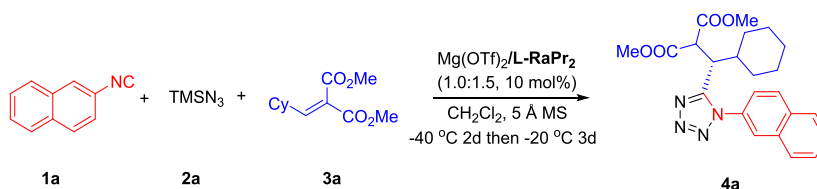

**General procedure 3:** To an oven-dried tube under nitrogen atmosphere were added  $\text{Mg(OTf)}_2$  (0.010 mmol, 10 mol%), **L-RaPr<sub>2</sub>** (0.015 mmol, 15 mol%), 2-(cyclohexylmethylene)malonate **3a** (0.15 mmol), 5 Å MS (10 mg) and  $\text{CH}_2\text{Cl}_2$  (1.0 mL). The mixture was stirred in  $\text{CH}_2\text{Cl}_2$  (1.0 mL) at 35 °C for 0.5 h. Subsequently,  $\text{TMSN}_3$  **2a** (0.15 mmol) and 2-naphthyl isocyanide **1a** (0.10 mmol) were added at -40 °C. The mixture was stirred at -40 °C for 2 days then at -20 °C for 3 days, and directly purified by flash chromatography on silica gel (eluent: petroleum ether/ethyl acetate = 9/1) to afford the desired product **4a** (91% yield, 95:5 e.r.).

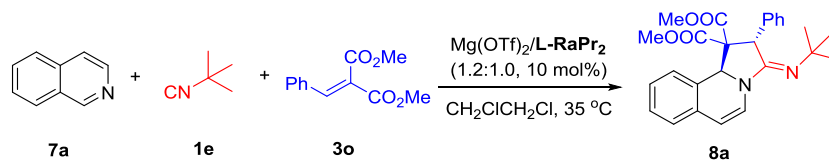

**General procedure 4:** To an oven-dried tube were added  $\text{Mg}(\text{OTf})_2$  (0.012 mmol, 12 mol%),  $\text{L-RaPr}_2$  (0.010 mmol, 10 mol%), dimethyl 2-benzylidenemalonate **3o** (0.15 mmol) and  $\text{CH}_2\text{ClCH}_2\text{Cl}$  (0.5 mL). The mixture was stirred in  $\text{CH}_2\text{ClCH}_2\text{Cl}$  (0.5 mL) at 35 °C for 0.5 h. Subsequently, isoquinoline **7a** (0.10 mmol) and *tert*-butyl isocyanide **1e** (0.15 mmol) were added at 35 °C. The mixture was stirred at 35 °C for 48 h, and directly purified by flash chromatography on silica gel (eluent: petroleum ether/ethyl acetate = 9/1) to afford the desired product **8a** (85% yield, 96.5:3.5 e.r.).

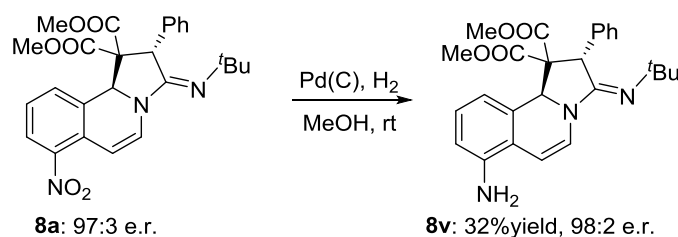

To an oven-dried tube under hydrogen atmosphere were added **8a** (0.1 mmol), Pd-C (0.02 mmol) and MeOH (1 mL). The mixture was stirred for 2h, directly purified by flash chromatography on silica gel (eluent: petroleum ether/ethyl acetate = 1/1) to afford the desired product **8v** (32% yield, 98:2 e.r.).

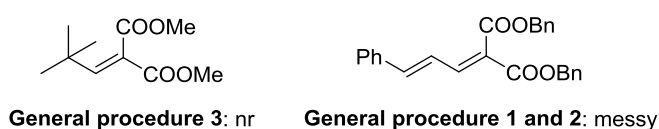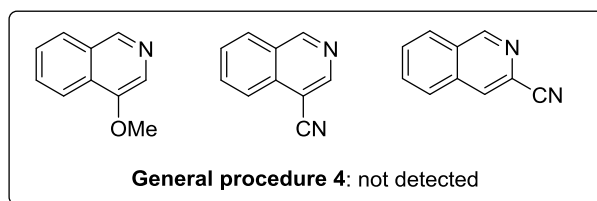

**Supplementary Figure 1.** Unsuccessful substrate scope

## Supplementary Tables

**Supplementary Table 1.** Screening of the metal salts<sup>a</sup>

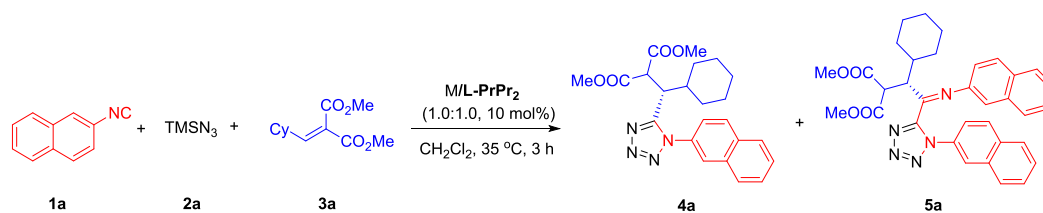

| Entry | Metal salts          | Yield of <b>4a</b> (%) <sup>b</sup> | Yield of <b>5a</b> (%) <sup>b</sup> | e.r. of <b>4a</b> <sup>c</sup> | e.r. of <b>5a</b> <sup>c</sup> |
|-------|----------------------|-------------------------------------|-------------------------------------|--------------------------------|--------------------------------|
| 1     | Sc(OTf) <sub>3</sub> | mess                                | mess                                | -                              | -                              |
| 2     | Mg(OTf) <sub>2</sub> | 29                                  | 53                                  | 82:18                          | 92.5:7.5                       |
| 3     | Ni(OTf) <sub>2</sub> | mess                                | mess                                | -                              | -                              |
| 4     | Zn(OTf) <sub>2</sub> | mess                                | mess                                | -                              | -                              |
| 5     | Yb(OTf) <sub>3</sub> | mess                                | mess                                | -                              | -                              |

<sup>a</sup> Reaction conditions: unless otherwise noted, all reactions were carried out with **1a** (0.10 mmol), **2a** (0.12mmol), **3a** (0.10 mmol) and **M/L-PrPr<sub>2</sub>** (1.0:1.0, 10 mol%) in  $\text{CH}_2\text{Cl}_2$  (1.0 mL) at 35 °C. <sup>b</sup> Isolated yield. <sup>c</sup> Determined by chiral HPLC analysis.

**Supplementary Table 2.** Screening of the ligand<sup>a</sup>

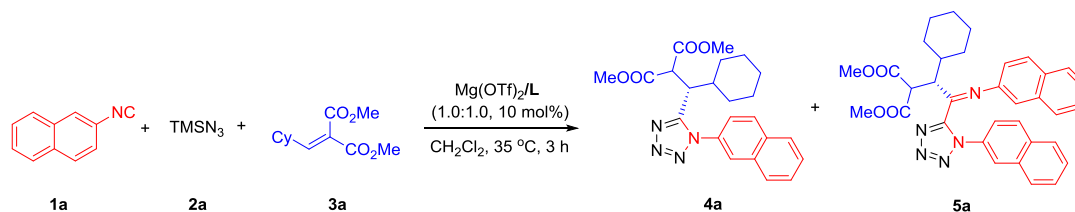

| Entry | Ligand                      | Yield of <b>4a</b> (%) <sup>b</sup> | Yield of <b>5a</b> (%) <sup>b</sup> | e.r. of <b>4a</b> <sup>c</sup> | e.r. of <b>5a</b> <sup>c</sup> |
|-------|-----------------------------|-------------------------------------|-------------------------------------|--------------------------------|--------------------------------|
| 1     | <b>L-PrPr<sub>2</sub></b>   | 29                                  | 53                                  | 82:18                          | 92.5:7.5                       |
| 2     | <b>L-RaPr<sub>3</sub></b>   | 36                                  | 43                                  | 72:28                          | 86.5:13.5                      |
| 3     | <b>L-RaPr<sub>2</sub></b>   | 38                                  | 46                                  | 83.5:16.5                      | 96:4                           |
| 4     | <b>L-RaEt<sub>2</sub></b>   | -                                   | 85                                  | -                              | 86.5:13.5                      |
| 5     | <b>L-RaEt<sub>2</sub>Me</b> | 16                                  | 72                                  | 55.5:44.5                      | 89:11                          |
| 6     | <b>L-RaMe<sub>2</sub></b>   | 44                                  | 53                                  | race                           | race                           |
| 7     | <b>L-RaBn</b>               | -                                   | 99                                  | -                              | race                           |
| 8     | <b>L-RaCy</b>               | -                                   | 99                                  | -                              | race                           |
| 9     | <b>L-RaAd</b>               | -                                   | 99                                  | -                              | 45.5:54.5                      |
| 10    | <b>L-PiPr<sub>3</sub></b>   | 41                                  | 44                                  | 64:36                          | 83.5:16.5                      |
| 11    | <b>L-PiPr<sub>2</sub></b>   | -                                   | 97                                  | -                              | 82:18                          |
| 12    | <b>L-PiEt<sub>2</sub></b>   | 33                                  | 51                                  | 55.5:44.5                      | 85.5:14.5                      |
| 13    | <b>L-PiMe<sub>2</sub></b>   | 15                                  | 77                                  | 44:56                          | 66.5:33.5                      |
| 14    | <b>L-PiPh</b>               | -                                   | 88                                  | -                              | 45:55                          |

<sup>a</sup> Reaction conditions: unless otherwise noted, all reaction were carried out with **1a** (0.10 mmol), **2a** (0.12mmol), **3a** (0.10 mmol) and Mg(OTf)<sub>2</sub>/L (1.0:1.0, 10 mol%) in CH<sub>2</sub>Cl<sub>2</sub> (1.0 mL) at 35 °C. <sup>b</sup> Isolated yield. <sup>c</sup> Determined by chiral HPLC analysis.

### Supplementary Table 3. Investigating the ratio of the metal salts and ligand<sup>a</sup>

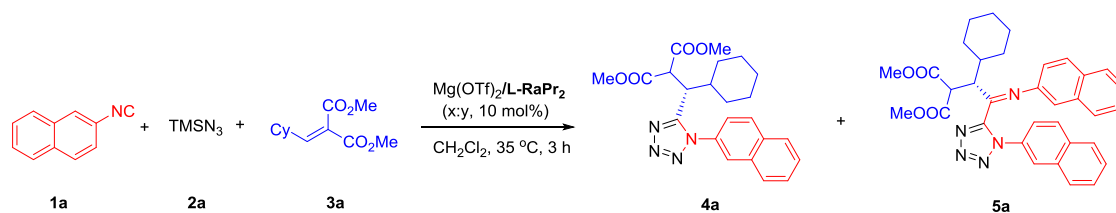

| Entry | Ratio of M:L | Yield of <b>4a</b> (%) <sup>b</sup> | Yield of <b>5a</b> (%) <sup>b</sup> | e.r. of <b>4a</b> <sup>c</sup> | e.r. of <b>5a</b> <sup>c</sup> |
|-------|--------------|-------------------------------------|-------------------------------------|--------------------------------|--------------------------------|
| 1     | 1.5:1.0      | -                                   | 88                                  | -                              | 94:6                           |
| 2     | 1.2:1.0      | 18                                  | 72                                  | 83.5:16.5                      | 95.5:4.5                       |
| 3     | 1.0:1.0      | 36                                  | 43                                  | 72:28                          | 86.5:13.5                      |
| 4     | 1.0:1.2      | 47                                  | 37                                  | 84:16                          | 97:3                           |
| 5     | 1.0:1.5      | 53                                  | 25                                  | 88:12                          | 95.5:4.5                       |

<sup>a</sup> Reaction conditions: unless otherwise noted, all reactions were carried out with **1a** (0.10 mmol), **2a** (0.12mmol), **3a** (0.10 mmol) and Mg(OTf)<sub>2</sub>/L-RaPr<sub>2</sub> (10 mol%) in CH<sub>2</sub>Cl<sub>2</sub> (1.0 mL) at 35 °C. <sup>b</sup> Isolated yield. <sup>c</sup> Determined by chiral HPLC analysis.

### Supplementary Table 4. Optimization of the solvents<sup>a</sup>

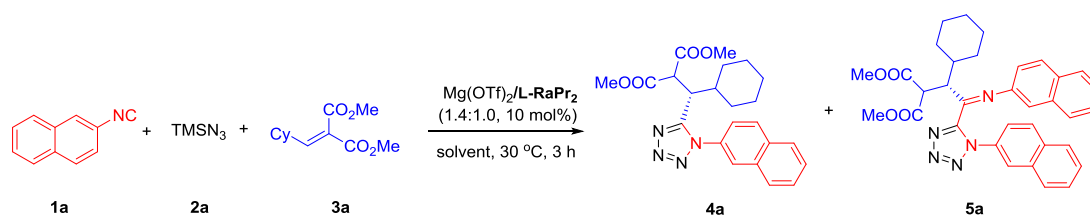

| Entry          | Solvent                              | Yield of <b>4a</b> (%) <sup>b</sup> | Yield of <b>5a</b> (%) <sup>b</sup> | e.r. of <b>4a</b> <sup>c</sup> | e.r. of <b>5a</b> <sup>c</sup> |
|----------------|--------------------------------------|-------------------------------------|-------------------------------------|--------------------------------|--------------------------------|
| 1              | THF                                  | -                                   | 32                                  | -                              | race                           |
| 2              | Toluene                              | 19                                  | 87                                  | 70:30                          | 86.5:13.5                      |
| 3              | CH <sub>2</sub> Cl <sub>2</sub>      | -                                   | 85                                  | -                              | 94.5:5.5                       |
| 4              | CH <sub>2</sub> ClCH <sub>2</sub> Cl | -                                   | 91                                  | -                              | 94.5:5.5                       |
| 5              | CHCl <sub>2</sub> CHCl <sub>2</sub>  | -                                   | 88                                  | -                              | 94:6                           |
| 6 <sup>d</sup> | CH <sub>2</sub> ClCH <sub>2</sub> Cl | -                                   | 91                                  | -                              | 94.5:5.5                       |

<sup>a</sup> Reaction conditions: unless otherwise noted, all reactions were carried out with **1a** (0.10 mmol), **2a** (0.12mmol), **3a** (0.10 mmol) and Mg(OTf)<sub>2</sub>/RaPr<sub>2</sub> (1.4:1.0, 10 mol%) in solvent (1.0 mL) at 30 °C. <sup>b</sup>

Isolated yield. <sup>c</sup> Determined by chiral HPLC analysis. <sup>d</sup> Reaction were carried out with **1a** (0.20 mmol), **2a** (0.24mmol), **3a** (0.20 mmol) and Mg(OTf)<sub>2</sub>/**L-RaPr**<sub>2</sub> (0.014 mol / 0.010 mmol, 1.4:1.0, 10 mol%) in CH<sub>2</sub>ClCH<sub>2</sub>Cl (1.0 mL) at 30 °C.

### Supplementary Table 5. Screening of the reaction temperature<sup>a</sup>

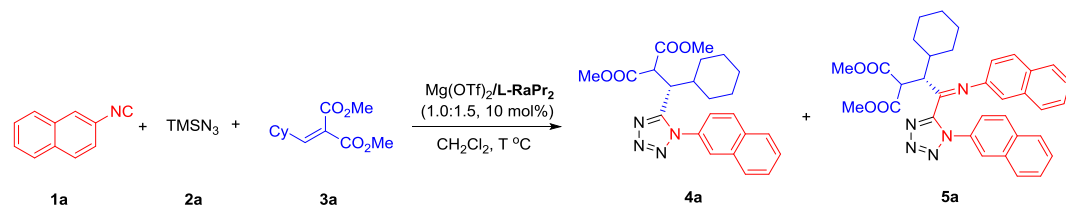

| Entry            | T (°C) | Yield of <b>4a</b> (%) <sup>b</sup> | Yield of <b>5a</b> (%) <sup>b</sup> | e.r. of <b>4a</b> <sup>c</sup> | e.r. of <b>5a</b> <sup>c</sup> |
|------------------|--------|-------------------------------------|-------------------------------------|--------------------------------|--------------------------------|
| 1 <sup>d</sup>   | 35     | 53                                  | 25                                  | 88:12                          | 95.5:4.5                       |
| 2 <sup>e</sup>   | 0      | 49                                  | 49                                  | 89:11                          | 95.5:4.5                       |
| 3 <sup>e</sup>   | -20    | 65                                  | 30                                  | 92.5:7.5                       | 96.5:3.5                       |
| 4 <sup>f</sup>   | -30    | 43                                  | -                                   | 94:6                           | -                              |
| 5 <sup>g</sup>   | -40    | 57                                  | -                                   | 94.5:5.5                       | -                              |
| 6 <sup>g,h</sup> | -20    | 30 ( <b>5o</b> )                    | -                                   | 93:7 ( <b>5o</b> )             | -                              |

<sup>a</sup> Reaction conditions: unless otherwise noted, all reactions were carried out with **1a** (0.10 mmol), **2a** (0.12mmol), **3a** (0.10 mmol) and Mg(OTf)<sub>2</sub>/**L-RaPr**<sub>2</sub> (1.0:1.5, 10 mol%) in CH<sub>2</sub>Cl<sub>2</sub> (1.0 mL) at T °C. <sup>b</sup> Isolated yield. <sup>c</sup> Determined by chiral HPLC analysis. <sup>d</sup> 3 h. <sup>e</sup> 3 days. <sup>f</sup> 4 days. <sup>g</sup> 7 days. <sup>h</sup> For dimethyl 2-benzylidenemalonate.

### Supplementary Table 6. Screening of the reaction additions<sup>a</sup>

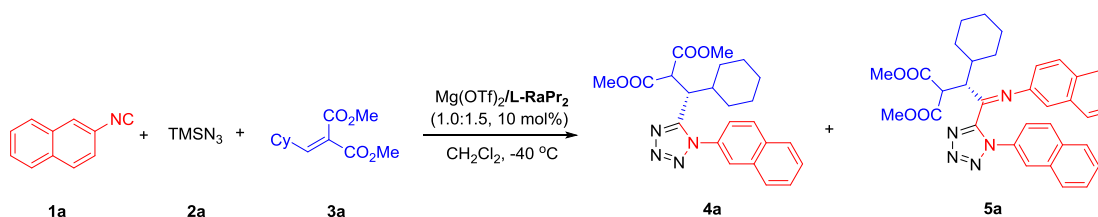

| Entry          | Additive                        | Yield of <b>4a</b> (%) <sup>b</sup> | Yield of <b>5a</b> (%) <sup>b</sup> | e.r. of <b>4a</b> <sup>c</sup> | e.r. of <b>5a</b> <sup>c</sup> |
|----------------|---------------------------------|-------------------------------------|-------------------------------------|--------------------------------|--------------------------------|
| 1 <sup>d</sup> | NaBAR <sub>4</sub> <sup>F</sup> | 47                                  | 53                                  | 92:8                           | 98:2                           |
| 2              | 3 Å MS                          | 69                                  | -                                   | 95:5                           | -                              |
| 3              | 4 Å MS                          | 72                                  | -                                   | 95:5                           | -                              |
| 4              | 5 Å MS                          | 73                                  | -                                   | 95:5                           | -                              |
| 5 <sup>e</sup> | 5 Å MS                          | 85                                  | -                                   | 93:7                           | -                              |
| 6 <sup>f</sup> | 5 Å MS                          | 91                                  | -                                   | 95:5                           | -                              |

<sup>a</sup> Reaction conditions: unless otherwise noted, all reactions were carried out with **1a** (0.10 mmol), **2a**



(0.12mmol), **3a** (0.10 mmol) and Mg(OTf)<sub>2</sub>/**L-RaPr**<sub>2</sub> (1.0:1.5, 10 mol%) in CH<sub>2</sub>Cl<sub>2</sub> (1.0 mL) at -40 °C for 7 days. <sup>b</sup> Isolated yield. <sup>c</sup> Determined by chiral HPLC analysis. <sup>d</sup> 2 days. <sup>e</sup> -20 °C for 4 days. <sup>f</sup> Reaction were carried out with **1a** (0.10 mmol), **2a** (0.15mmol), **3a** (0.15 mmol) and Mg(OTf)<sub>2</sub>/**RaPr**<sub>2</sub> (1.0:1.5, 10 mol%) in CH<sub>2</sub>Cl<sub>2</sub> (1.0 mL) at -40 °C for 2 days, then -20 °C for 3 days.

### Supplementary Table 7. Screening of the ligand<sup>a</sup>

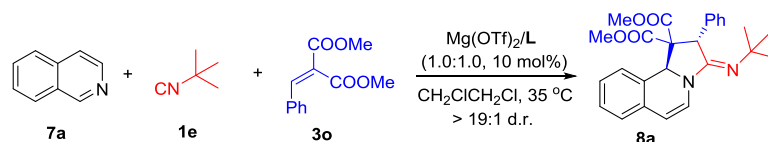

| Entry | Ligand                     | Yield (%) <sup>b</sup> | e.r. <sup>c</sup> |
|-------|----------------------------|------------------------|-------------------|
| 1     | <b>L-RaPr</b> <sub>2</sub> | 42                     | 96:4              |
| 2     | <b>L-PrPr</b> <sub>2</sub> | 19                     | 71.5:28.5         |
| 3     | <b>L-PiPr</b> <sub>2</sub> | 36                     | 60:40             |
| 4     | <b>L-RaPr</b> <sub>3</sub> | 12                     | 95:5              |
| 5     | <b>L-RaEt</b> <sub>2</sub> | 20                     | 85:15             |
| 6     | <b>L-RaMe</b> <sub>2</sub> | 37                     | race              |
| 7     | <b>L-RaPh</b>              | 88                     | 47.5:52.5         |
| 8     | <b>L-RaAd</b>              | 68                     | 43.5:56.5         |

<sup>a</sup> Unless otherwise noted, all reactions were carried out with **7e** (0.10 mmol), **1e** (0.15mmol), **3o** (0.10 mmol) and Mg(OTf)<sub>2</sub>/**L-RaPr**<sub>2</sub> (1.0:1.0, 10 mol%) in CH<sub>2</sub>ClCH<sub>2</sub>Cl (0.5 mL) at 35 °C for 2 days. <sup>b</sup> Isolated yield. <sup>c</sup> Determined by chiral HPLC analysis.

### Supplementary Table 8. Optimization of the solvents<sup>a</sup>

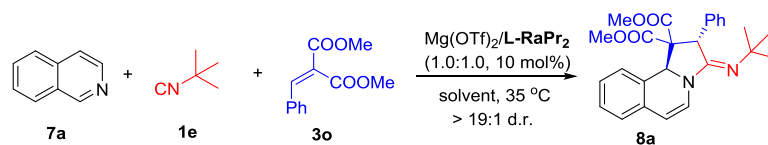

| Entry | Solvent                              | Yield (%) <sup>b</sup> | e.r. <sup>c</sup> |
|-------|--------------------------------------|------------------------|-------------------|
| 1     | CH <sub>2</sub> Cl <sub>2</sub>      | 41                     | 95.5:4.5          |
| 2     | CH <sub>2</sub> ClCH <sub>2</sub> Cl | 42                     | 96:4              |
| 3     | CHCl <sub>2</sub> CHCl <sub>2</sub>  | 40                     | 96:4              |
| 4     | THF                                  | nr                     | -                 |
| 5     | Toluene                              | trace                  | -                 |
| 6     | Ethyl acetate                        | trace                  | -                 |

<sup>a</sup> Unless otherwise noted, all reactions were carried out with **7a** (0.10 mmol), **1e** (0.15 mmol), **3o** (0.10

mmol) and  $\text{Mg}(\text{OTf})_2/\text{L-RaPr}_2$  (1.0:1.0, 10 mol%) in solvent (0.5 mL) at 35 °C for 2 days. <sup>b</sup> Isolated yield. <sup>c</sup> Determined by chiral HPLC analysis.

**Supplementary Table 9.** Investigating the ratio of the metal salts and ligand<sup>a</sup>

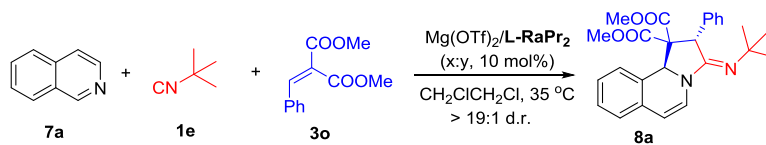

| Entry          | Ratio of <b>M:L</b> | Yield (%) <sup>b</sup> | e.r. <sup>c</sup> |
|----------------|---------------------|------------------------|-------------------|
| 1              | 1.5:1.0             | 61                     | 90.5:9.5          |
| 2              | 1.2:1.0             | 57                     | 95.5:4.5          |
| 3              | 1.0:1.0             | 42                     | 96:4              |
| 4              | 1.0:1.2             | 40                     | 96:4              |
| 5              | 1.0:1.5             | 31                     | 96:4              |
| 6 <sup>d</sup> | 1.2:1.0             | 85                     | 96.5:3.5          |

<sup>a</sup> Unless otherwise noted, all reactions were carried out with **7e** (0.10 mmol), **1e** (0.15mmol), **3o** (0.10 mmol) and  $\text{Mg}(\text{OTf})_2/\text{L-RaPr}_2$  (x:y, 10 mol%) in  $\text{CH}_2\text{ClCH}_2\text{Cl}$  (0.5 mL) at 35 °C for 2 days. <sup>b</sup> Isolated yield. <sup>c</sup> Determined by chiral HPLC analysis. <sup>d</sup> **3o** was 0.15 mmol.

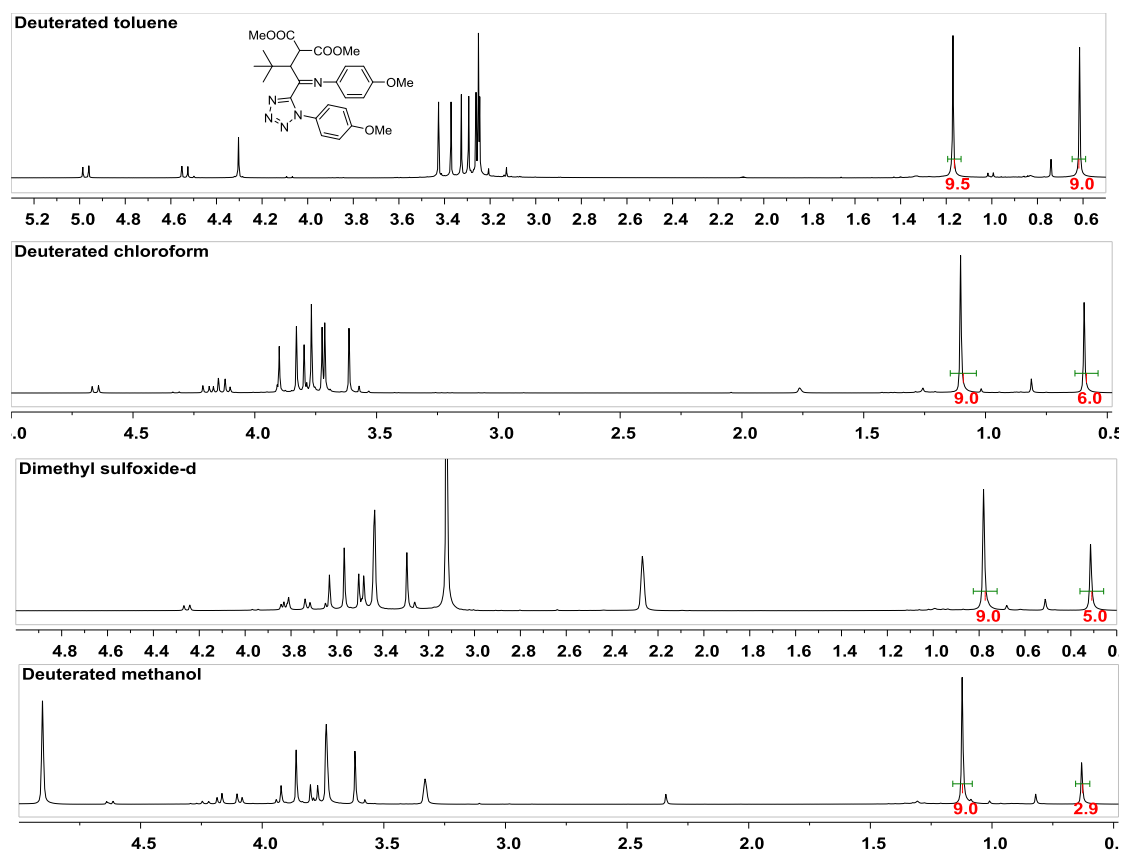

**Supplementary Figure 2.** NMR spectra of four-molecule tetrazole **5z** in different deuterium solvents

**Supplementary Discussion 1.** The NMR spectra could reversibly change in different solvents. It indicates rotamers exists in solution of four-molecule product.<sup>5-6</sup>

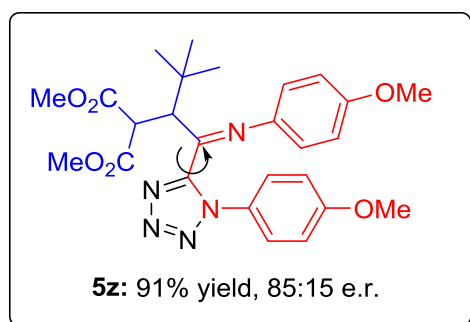

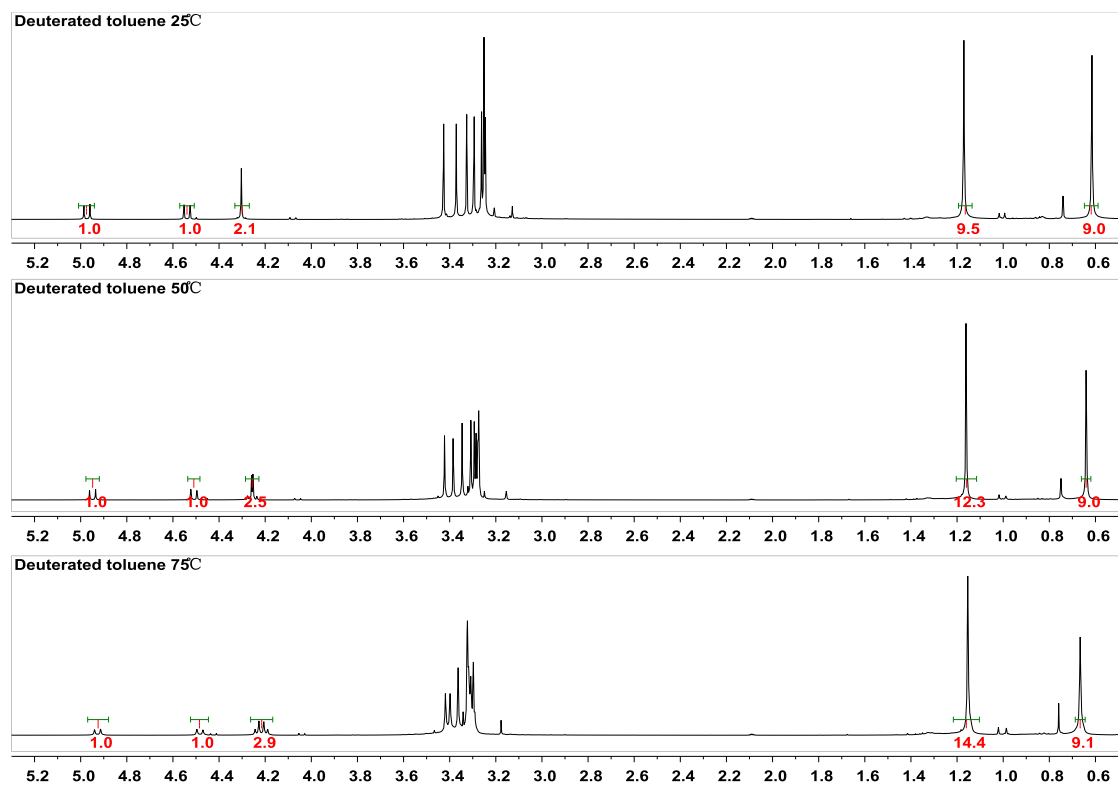

**Supplementary Figure 3.** NMR spectra of four-molecule tetrazole **5z** in different temperature

**Supplementary Discussion 2.** The NMR spectra could reversibly change in different temperature. It indicates rotamers exists in solution of four-molecule product.

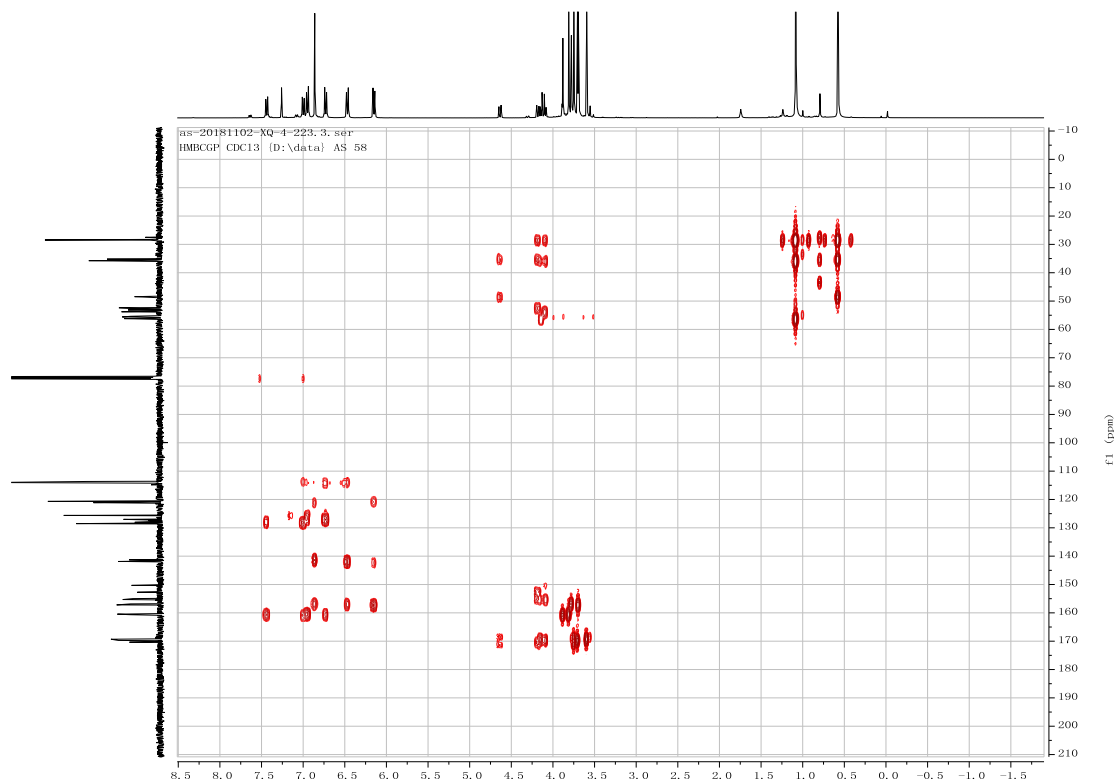

**Supplementary Figure 4.** HMBCGP of four-molecule tetrazole **5z** Supplementary

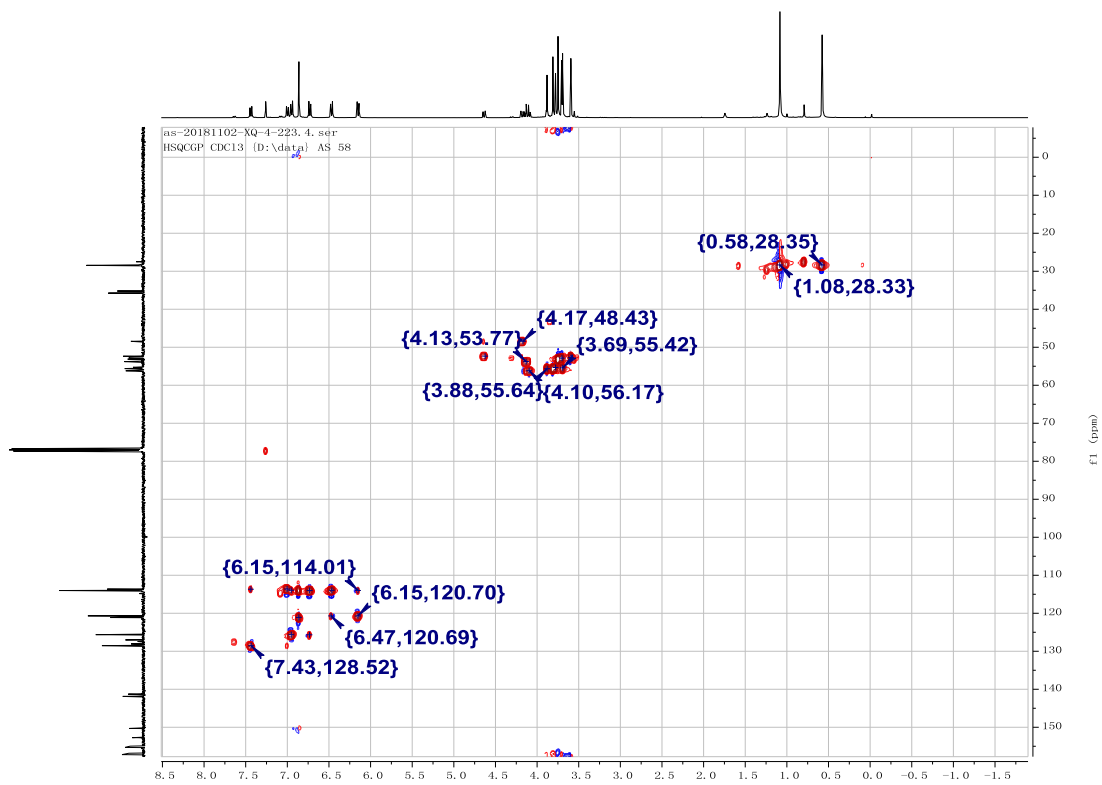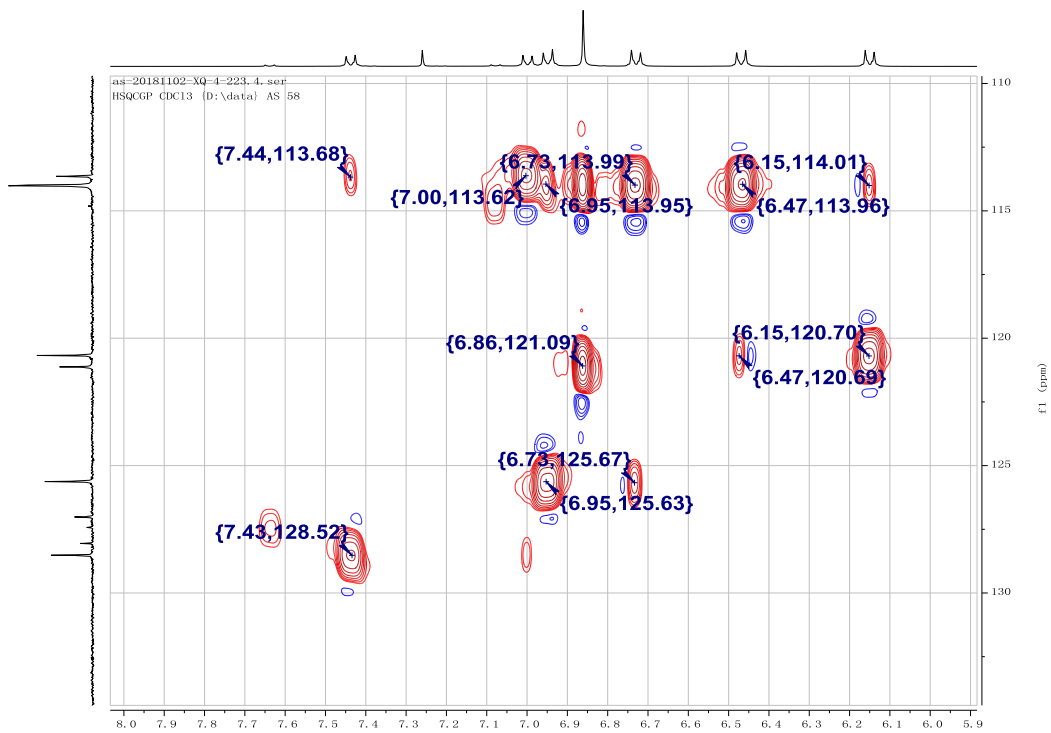

**Figure 5.** HSQC GP of four-molecule tetrazole **5z**

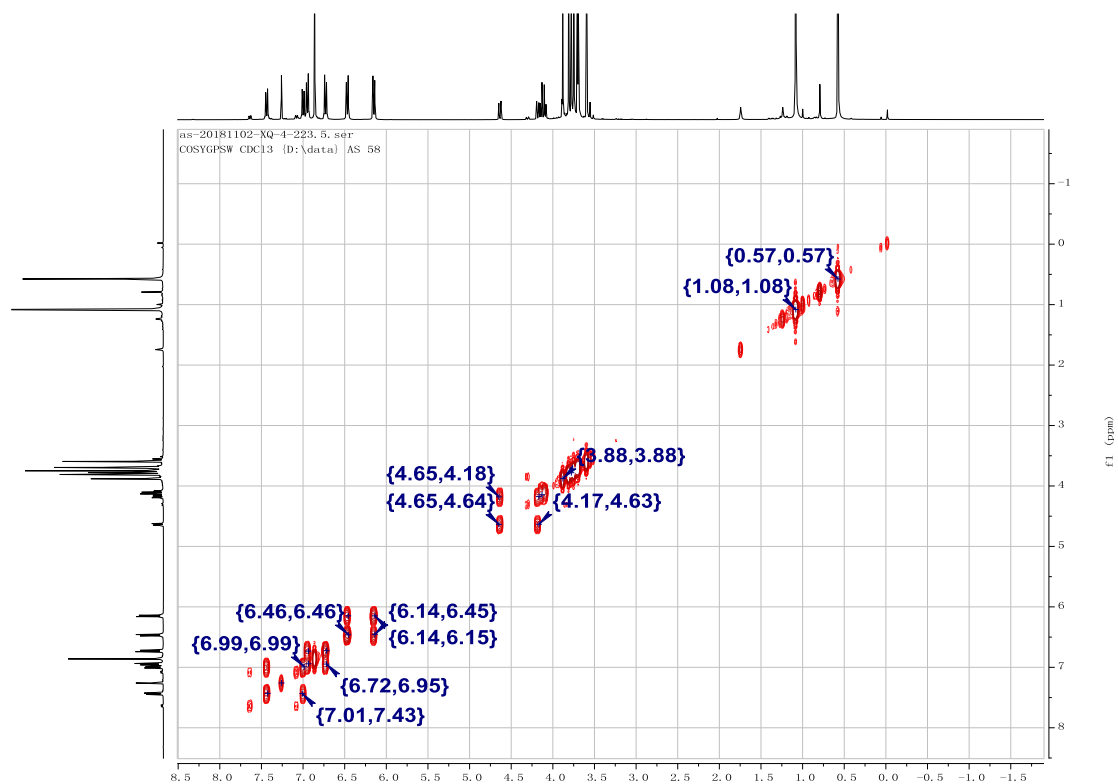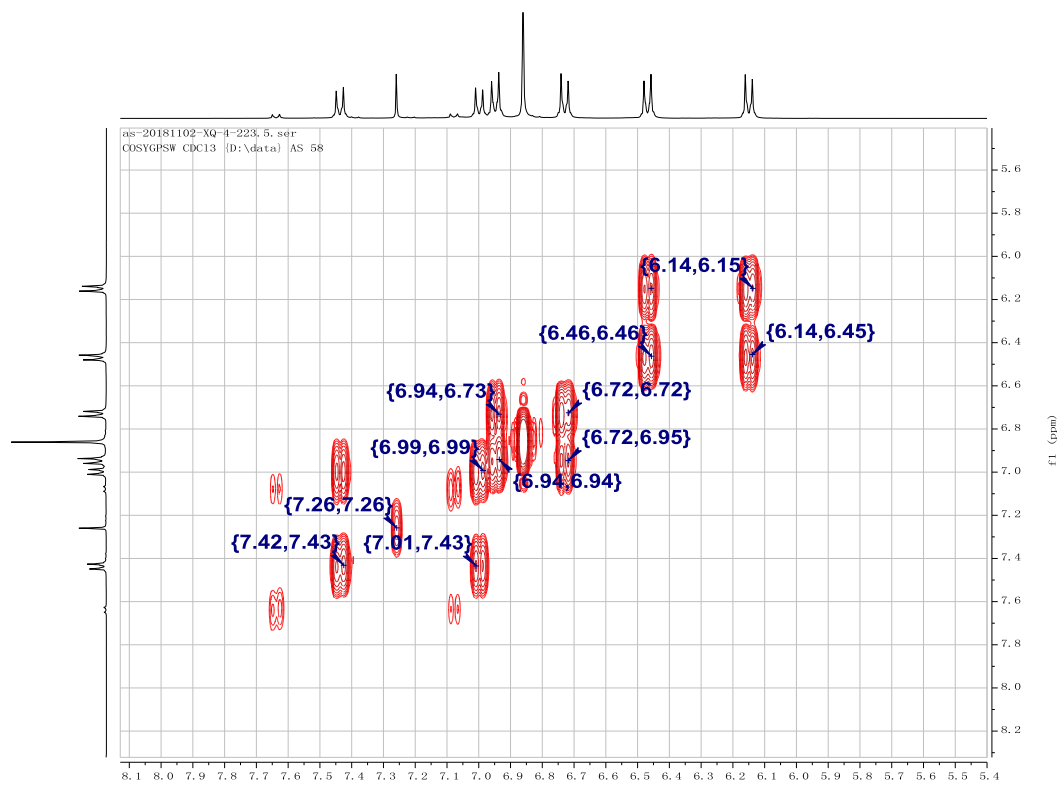

**Supplementary Figure 6. COSYGPSW of four-molecule tetrazole 5z**

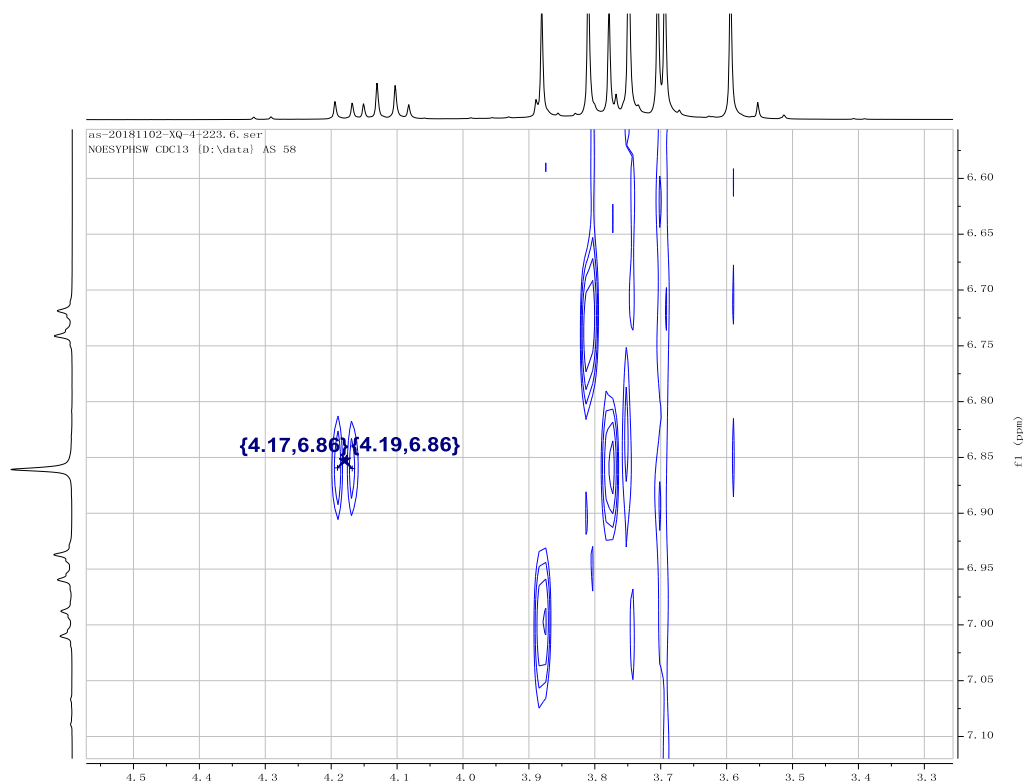

**Supplementary Figure 7. NOESYPSHW of four-molecule tetrazole **5z****

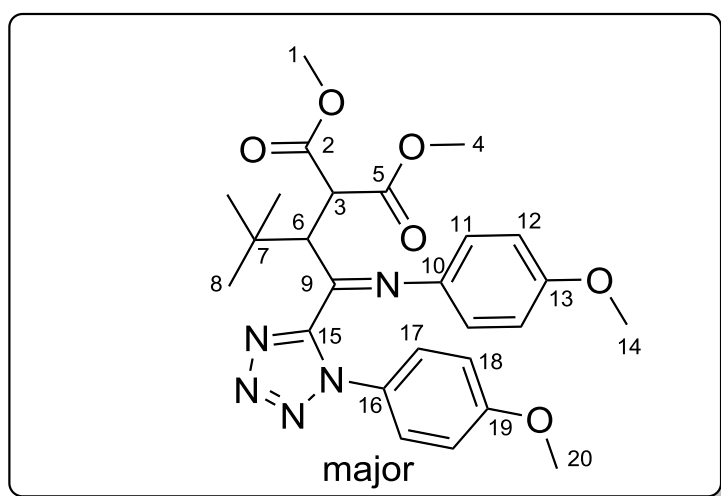

|                  |                  |
|------------------|------------------|
| 1: 3.59, 52.6;   | 2: 169.3;        |
| 3: 4.13, 53.8;   | 4: 3.70, 52.8;   |
| 5: 169.7;        | 6: 4.10, 56.2;   |
| 7: 35.8;         | 8: 1.08, 28.5;   |
| 9: 150.3;        | 10: 127.0;       |
| 11: 6.95, 125.6; | 12: 6.73, 114.0; |
| 13: 160.5;       | 14: 3.81, 55.6;  |
| 15: 155.3;       | 16: 141.9;       |
| 17: 6.15, 120.7; | 18: 6.47, 114.0; |
| 19: 157.2;       | 20: 3.69, 55.4;  |

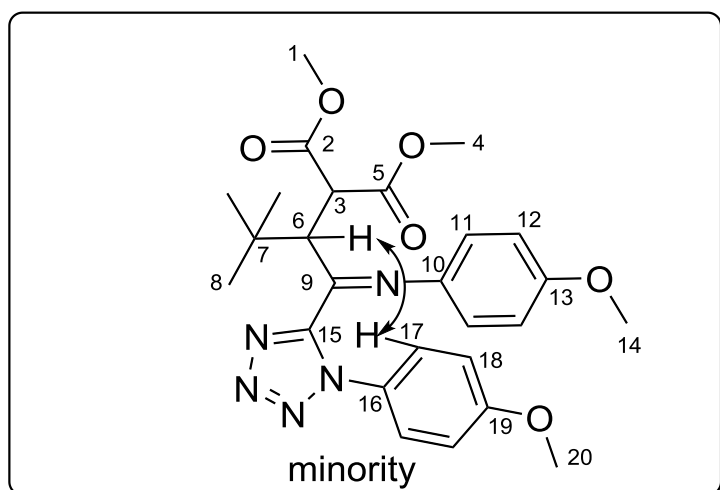

- |                  |                  |
|------------------|------------------|
| 1: 3.75, 53.1;   | 2: 170.3;        |
| 3: 4.64, 52.4;   | 4: 3.75, 53.1;   |
| 5: 169.3;        | 6: 4.18, 48.4;   |
| 7: 35.2;         | 8: 0.58, 28.4;   |
| 9: 152.7;        | 10: 128.0;       |
| 11: 7.00, 113.7; | 12: 7.44, 128.5; |
| 13: 160.7;       | 14: 3.88, 55.6;  |
| 15: 155.0;       | 16: 141.3;       |
| 17: 6.86, 121.1; | 18: 6.86, 114.0; |
| 19: 156.8;       | 20: 3.78, 55.3;  |



## The analytical and spectral characterization data of products

### Dimethyl 2-{cyclohexyl[1-(naphthalen-2-yl)-1H-tetrazol-5-yl]methyl}malonate (**4a**)

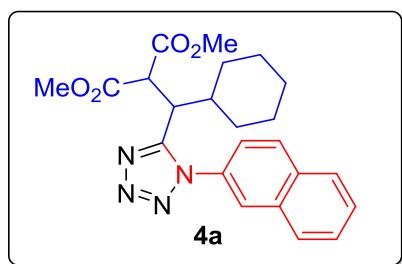

Coreless oil; 91% yield, 95:5 e.r.;  $[\alpha]_D^{21} = -23.2$  ( $c = 0.76$  in  $\text{CH}_2\text{Cl}_2$ ).

**HPLC** DAICEL CHIRALCEL IC, *n*-hexane/2-propanol = 70/30, flow rate = 1.0 mL/min,  $\lambda = 254$  nm,  $t_R$  (minor) = 9.05 min,  $t_R$  (major) = 11.05 min.

**IR** (neat): 2928, 1744, 1441, 1263, 1159, 819 and  $752\text{ cm}^{-1}$ .

**$^1\text{H}$  NMR** (400 MHz,  $\text{CDCl}_3$ )  $\delta = 8.26$  (s, 1H), 8.10 – 8.02 (m, 1H), 8.01 – 7.92 (m, 2H), 7.81 – 7.82 (m, 1H), 7.67 – 7.55 (m, 2H), 4.52 (d,  $J = 11.6$  Hz, 1H), 3.93 (dd,  $J = 11.6, 4.4$  Hz, 1H), 3.79 (s, 3H), 3.66 (s, 3H), 1.89 – 1.61 (m, 2H), 1.56 – 1.43 (m, 3H), 1.13 – 0.82 (m, 5H), 0.56 – 0.34 (m, 1H).

**$^{13}\text{C}\{^1\text{H}\}$  NMR** (101 MHz,  $\text{CDCl}_3$ )  $\delta = 168.7, 168.3, 155.0, 133.6, 133.0, 131.7, 130.1, 128.8, 128.1, 128.0, 127.6, 125.4, 123.2, 53.5, 53.2, 40.4, 39.3, 31.7, 27.4, 26.3, 26.1, 25.8$ .

**HRMS (ESI-FT)** calcd for  $\text{C}_{23}\text{H}_{27}\text{N}_4\text{O}_4^+$  ( $[\text{M}+\text{H}^+]$ ) = 423.2027, Found 423.2021.

Chiral HPLC spectrum **4a**:

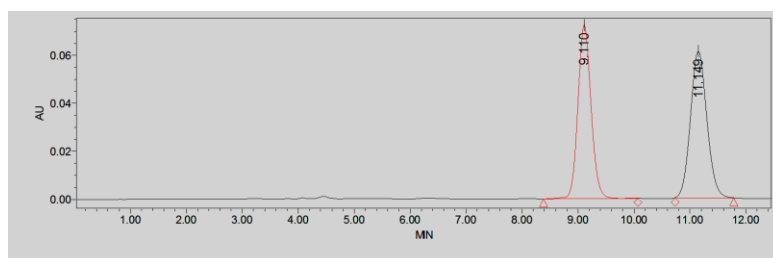

|   | Retention Time | Area    | % Area |
|---|----------------|---------|--------|
| 1 | 9.110          | 1187777 | 48.21  |
| 2 | 11.149         | 1275855 | 51.79  |

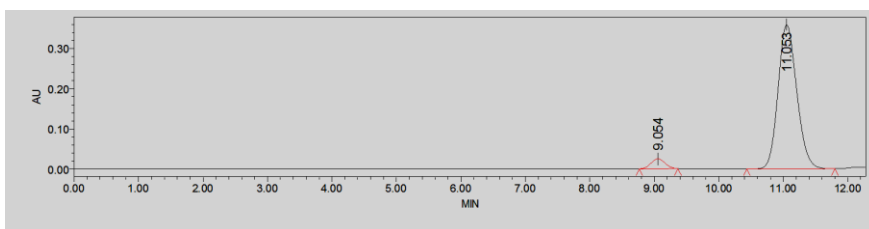

|   | Retention Time | Area    | % Area |
|---|----------------|---------|--------|
| 1 | 9.054          | 380179  | 4.99   |
| 2 | 11.053         | 7233340 | 95.01  |

**Diethyl 2-{cyclohexyl[1-(naphthalen-2-yl)-1H-tetrazol-5-yl]methyl}malonate (**4b**)**

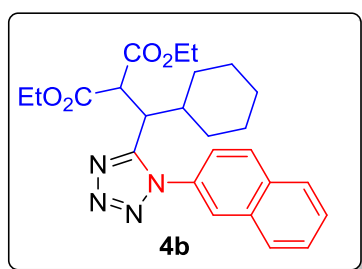

Coreless oil; 87% yield, 96.5:3.5 e.r.;  $[\alpha]_D^{21} = -31.9$  ( $c = 0.54$  in  $\text{CH}_2\text{Cl}_2$ ).

**HPLC** DAICEL CHIRALCEL IC, *n*-hexane/2-propanol = 70/30, flow rate = 1.0 mL/min,  $\lambda = 254$  nm,  $t_R$  (minor) = 7.83 min,  $t_R$  (major) = 9.72 min.

**IR** (neat): 2932, 2857, 1742, 1445, 1306, 1101, 1026, 862, 819 and  $752\text{ cm}^{-1}$ .

**$^1\text{H}$  NMR** (400 MHz,  $\text{CDCl}_3$ )  $\delta = 8.27$  (s, 1H), 8.10 – 8.03 (m, 1H), 8.02 – 7.92 (m, 2H), 7.84 – 7.73 (m, 1H), 7.72 – 7.44 (m, 2H), 4.47 (d,  $J = 11.6$  Hz, 1H), 4.34 – 4.18 (m, 2H), 4.16 – 4.05 (m, 2H), 3.94 (dd,  $J = 11.6, 4.4$  Hz, 1H), 1.81 (d,  $J = 11.8$  Hz, 1H), 1.70 (d,  $J = 11.6$  Hz, 1H), 1.58 – 1.43 (m, 3H), 1.29 (t,  $J = 7.2$  Hz, 3H), 1.19 (t,  $J = 7.2$  Hz, 3H), 1.10 – 0.77 (m, 5H), 0.52 – 0.33 (m, 1H).

**$^{13}\text{C}\{^1\text{H}\}$  NMR** (101 MHz,  $\text{CDCl}_3$ )  $\delta = 168.3, 168.0, 155.1, 133.6, 133.1, 131.7, 130.1, 128.8, 128.1, 128.0, 127.5, 125.4, 123.2, 62.2, 62.1, 53.8, 40.4, 39.3, 31.8, 27.4, 26.4, 26.1, 25.8, 14.2, 14.0$ .

**HRMS** (ESI-FT) calcd for  $\text{C}_{25}\text{H}_{31}\text{N}_4\text{O}_4^+$  ( $[\text{M}+\text{H}^+]$ ) = 451.2340, Found 451.2336.

Chiral HPLC spectrum **4b**:

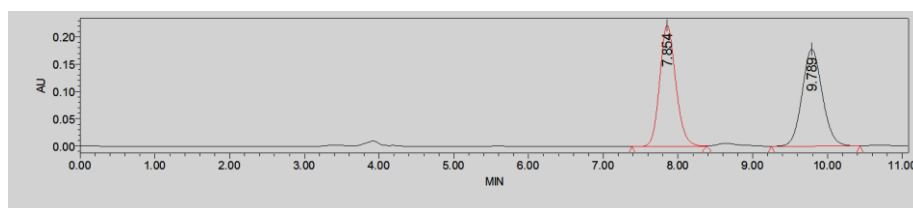

|   | Retention Time | Area    | % Area |
|---|----------------|---------|--------|
| 1 | 7.854          | 3337122 | 49.95  |
| 2 | 9.789          | 3343512 | 50.05  |

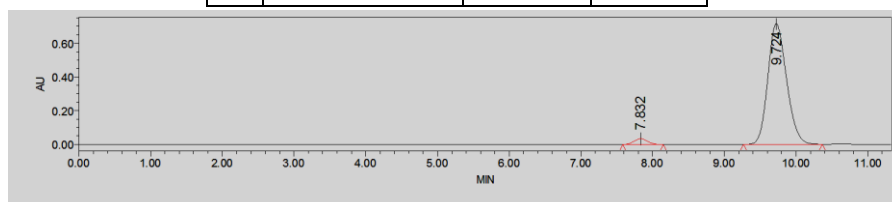

|   | Retention Time | Area     | % Area |
|---|----------------|----------|--------|
| 1 | 7.832          | 468136   | 3.48   |
| 2 | 9.724          | 12969465 | 96.52  |

#### Diisopropyl 2-(cyclohexyl[1-(naphthalen-2-yl)-1H-tetrazol-5-yl]methyl)malonate (**4c**)

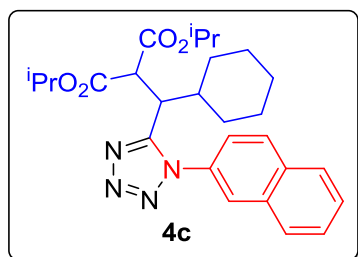

Coreless oil; 52% yield, 96.5:3.5 e.r.;  $[\alpha]_D^{21} = -32.0$  ( $c = 0.34$  in  $\text{CH}_2\text{Cl}_2$ ).

**HPLC** DAICEL CHIRALCEL IC, *n*-hexane/2-propanol = 70/30, flow rate = 1.0 mL/min,  $\lambda = 254$  nm,  $t_R$  (minor) = 5.93 min,  $t_R$  (major) = 7.22 min.

**IR** (neat): 2982, 2932, 2857, 1740, 1512, 1447, 1370, 1267, 1103, 822 and 752  $\text{cm}^{-1}$ .

**$^1\text{H}$  NMR** (400 MHz,  $\text{CDCl}_3$ )  $\delta = 8.29$  (s, 1H), 8.10 – 8.03 (m, 1H), 8.02 – 7.93 (m, 2H), 7.85 – 7.86 (m, 1H), 7.69 – 7.58 (m, 2H), 5.21 – 5.03 (m, 1H), 5.01 – 4.84 (m, 1H), 4.41 (d,  $J = 11.6$  Hz, 1H), 3.93 (dd,  $J = 11.6, 4.4$  Hz, 1H), 1.85 – 1.63 (m, 2H), 1.57 – 1.42 (m, 3H), 1.28 (dd,  $J = 6.4, 3.2$  Hz, 6H), 1.17 (dd,  $J = 6.4, 3.2$  Hz, 6H), 1.11 – 0.80 (m, 5H), 0.50 – 0.34 (m, 1H).

**$^{13}\text{C}\{^1\text{H}\}$  NMR** (101 MHz,  $\text{CDCl}_3$ )  $\delta = 167.9, 167.7, 155.2, 133.6, 133.1, 131.8, 130.1, 128.9, 128.1, 127.9, 127.5, 125.3, 123.3, 69.9, 69.7, 54.3, 40.4, 39.2, 31.8, 27.4, 26.4, 26.1, 25.9, 21.8, 21.7, 21.6, 21.5$ .

**HRMS** (ESI-FT) calcd for  $C_{27}H_{35}N_4O_4^+$  ( $[M+H]^+$ ) = 479.2653, Found 479.2646.

Chiral HPLC spectrum **4c**:

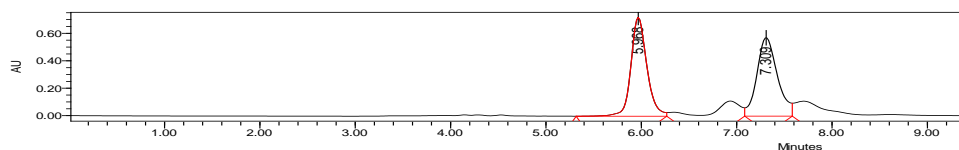

|   | Retention Time | Area    | % Area |
|---|----------------|---------|--------|
| 1 | 5.968          | 8328302 | 49.42  |
| 2 | 7.309          | 8524263 | 50.58  |

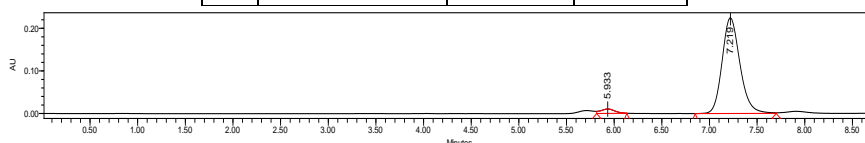

|   | Retention Time | Area    | % Area |
|---|----------------|---------|--------|
| 1 | 5.933          | 105489  | 3.48   |
| 2 | 7.219          | 2925446 | 96.52  |

**Dibenzyl 2-{cyclohexyl[1-(naphthalen-2-yl)-1H-tetrazol-5-yl]methyl}malonate (**4d**)**

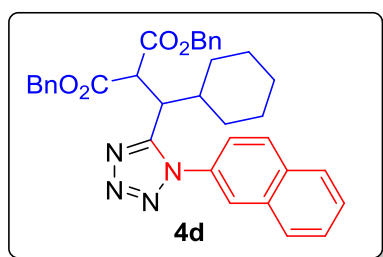

Coreless oil; 80% yield, 97:3 e.r.;  $[\alpha]_D^{21} = -15.0$  ( $c = 0.67$  in  $CH_2Cl_2$ ).

**HPLC** DAICEL CHIRALCEL IC, *n*-hexane/2-propanol = 70/30, flow rate = 1.0 mL/min,  $\lambda = 254$  nm,  $t_R$  (minor) = 11.52 min,  $t_R$  (major) = 12.60 min.

**IR** (neat): 2930, 2855, 1744, 1506, 1449, 1265, 905, 746 and 698  $cm^{-1}$ .

**<sup>1</sup>H NMR** (400 MHz,  $CDCl_3$ )  $\delta = 8.18$  (s, 1H), 8.07 – 8.00 (m, 1H), 8.00 – 7.91 (m, 2H), 7.75 – 7.70 (m, 1H), 7.68 – 7.58 (m, 2H), 7.37 – 7.28 (m, 8H), 7.24 – 7.19 (m, 2H), 5.20 (dd,  $J = 30.0, 12.0$  Hz, 2H), 5.12 – 5.02 (m, 2H), 4.61 (d,  $J = 11.6$  Hz, 1H), 3.95 (dd,  $J = 11.6, 4.4$  Hz, 1H), 1.79 – 1.72 (m, 1H), 1.64 – 1.55 (m, 1H), 1.47 – 1.33 (m, 3H), 0.99 – 0.78 (m, 5H), 0.49 – 0.27 (m, 1H).

**<sup>13</sup>C{<sup>1</sup>H} NMR** (101 MHz,  $CDCl_3$ )  $\delta = 168.0, 167.6, 154.9, 135.0, 134.9, 133.6, 133.0, 131.6, 130.1, 128.8, 128.7, 128.7, 128.6, 128.5, 128.1, 128.0, 127.5, 125.3, 123.2,$

67.8, 53.8, 40.1, 39.4, 31.7, 27.3, 26.2, 25.8, 25.7.

**HRMS** (ESI-FT) calcd for  $C_{35}H_{35}N_4O_4^+$  ( $[M+H]^+$ ) = 575.2653, Found 575.2653.

Chiral HPLC spectrum **4d**:

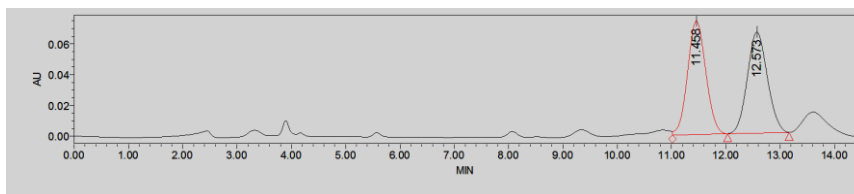

|   | Retention Time | Area    | % Area |
|---|----------------|---------|--------|
| 1 | 11.458         | 1721760 | 50.55  |
| 2 | 12.573         | 1684014 | 49.45  |

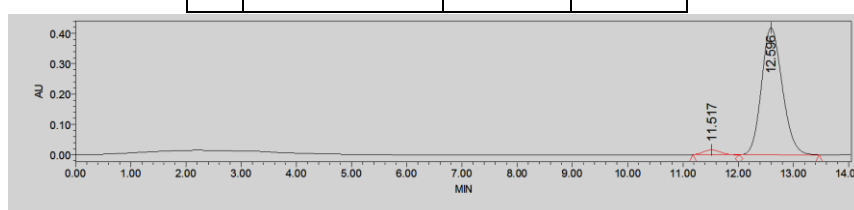

|   | Retention Time | Area     | % Area |
|---|----------------|----------|--------|
| 1 | 11.517         | 333334   | 2.96   |
| 2 | 12.596         | 10929321 | 97.04  |

**Dimethyl 2-{cycloheptyl[1-(naphthalen-2-yl)-1H-tetrazol-5-yl]methyl}malonate (**4e**)**

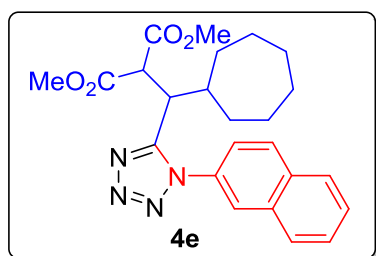

Coreless oil; 22% yield, 96:4 e.r.;  $[\alpha]_D^{21} = -26.2$  ( $c = 0.13$  in  $CH_2Cl_2$ ).

**HPLC** DAICEL CHIRALCEL IC, *n*-hexane/2-propanol = 70/30, flow rate = 1.0 mL/min,  $\lambda = 254$  nm,  $t_R$  (minor) = 8.59 min,  $t_R$  (major) = 10.31 min.

**IR** (neat): 2928, 2857, 1746, 1603, 1512, 1439, 1312, 1184, 1024, 864 and 750  $cm^{-1}$ .

**<sup>1</sup>H NMR** (400 MHz,  $CDCl_3$ )  $\delta = 8.29$  (s, 1H), 8.10 – 8.03 (m, 1H), 8.03 – 7.93 (m, 2H), 7.82 – 7.84 (m, 1H), 7.69 – 7.56 (m, 2H), 4.52 (d,  $J = 11.6$  Hz, 1H), 3.98 (dd,  $J = 11.6, 3.6$  Hz, 1H), 3.79 (s, 3H), 3.67 (s, 3H), 1.99 – 1.86 (m, 1H), 1.68 – 1.50 (m, 2H), 1.29 – 1.20 (m, 9H), 0.80 – 0.62 (m, 1H).

**<sup>13</sup>C{<sup>1</sup>H} NMR** (101 MHz,  $CDCl_3$ )  $\delta = 168.7, 168.4, 155.0, 133.6, 133.1, 131.9, 130.2,$

128.9, 128.1, 128.0, 127.6, 125.3, 123.2, 77.48, 54.0, 53.2, 41.5, 40.2, 33.7, 28.6, 27.9, 27.6, 26.7, 26.3.

**HRMS** (ESI-FT) calcd for  $C_{24}H_{29}N_4O_4^+$  ( $[M+H]^+$ ) = 437.2183, Found 437.2180.

Chiral HPLC spectrum **4e**:

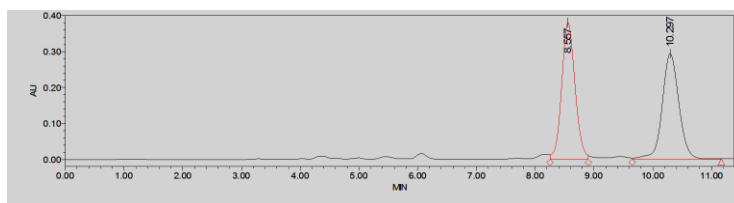

|   | Retention Time | Area    | % Area |
|---|----------------|---------|--------|
| 1 | 8.557          | 5983793 | 50.94  |
| 2 | 10.297         | 5762979 | 49.06  |

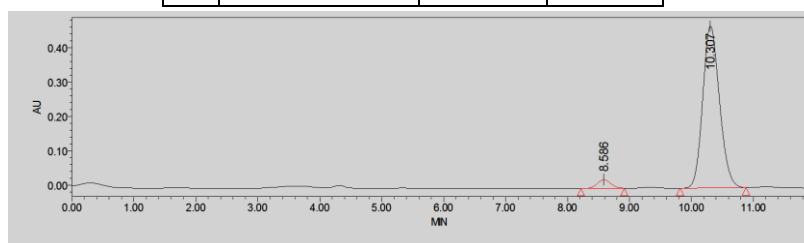

|   | Retention Time | Area    | % Area |
|---|----------------|---------|--------|
| 1 | 8.586          | 368369  | 3.99   |
| 2 | 10.307         | 8868054 | 96.01  |

**Dimethyl 2-{cyclopentyl[1-(naphthalen-2-yl)-1H-tetrazol-5-yl]methyl}malonate (4f)**

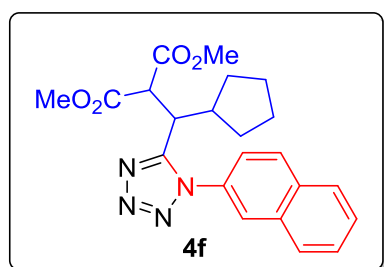

Coreless oil; 90% yield, 94:6 e.r.;  $[\alpha]_D^{21} = -35.5$  ( $c = 0.54$  in  $CH_2Cl_2$ ).

**HPLC** DAICEL CHIRALCEL IC, *n*-hexane/2-propanol = 70/30, flow rate = 1.0 mL/min,  $\lambda = 254$  nm,  $t_R$  (minor) = 10.97 min,  $t_R$  (major) = 11.78 min.

**IR** (neat): 2928, 2857, 1746, 1506, 1450, 1312, 1024, 865, 819 and 749  $cm^{-1}$ .

**<sup>1</sup>H NMR** (400 MHz,  $CDCl_3$ )  $\delta = 8.26$  (s, 1H), 8.10 – 8.04 (m, 1H), 8.03 – 7.93 (m, 2H), 7.81 – 7.75 (m, 1H), 7.69 – 7.59 (m, 2H), 4.40 (d,  $J = 11.2$  Hz, 1H), 4.02 (dd,  $J = 11.2, 6.4$  Hz, 1H), 3.79 (s, 3H), 3.67 (s, 3H), 2.12 – 1.91 (m, 1H), 1.64 – 1.52 (m, 1H),

1.46 – 1.29 (m, 6H), 0.75 – 0.51 (m, 1H).

$^{13}\text{C}\{^1\text{H}\}$  NMR (101 MHz,  $\text{CDCl}_3$ )  $\delta$  = 168.5, 168.4, 155.6, 133.7, 133.1, 131.5, 130.2, 128.8, 128.1, 128.0, 127.6, 125.4, 123.2, 55.5, 53.2, 43.0, 37.5, 30.6, 27.6, 24.7, 24.0.

HRMS (ESI-FT) calcd for  $\text{C}_{22}\text{H}_{25}\text{N}_4\text{O}_4^+$  ( $[\text{M}+\text{H}^+]$ ) = 409.1870, Found 409.1866.

Chiral HPLC spectrum **4f**:

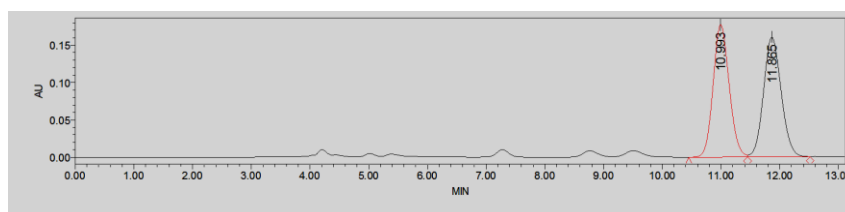

|   | Retention Time | Area    | % Area |
|---|----------------|---------|--------|
| 1 | 10.993         | 3366363 | 50.18  |
| 2 | 11.865         | 3342596 | 49.82  |

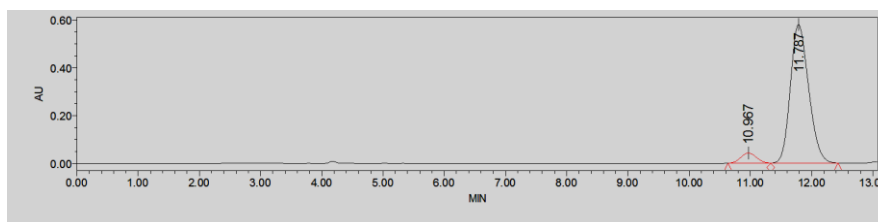

|   | Retention Time | Area     | % Area |
|---|----------------|----------|--------|
| 1 | 10.967         | 765998   | 6.00   |
| 2 | 11.787         | 11997390 | 94.00  |

Dimethyl 2-{cyclobutyl[1-(naphthalen-2-yl)-1H-tetrazol-5-yl]methyl}malonate (**4g**)

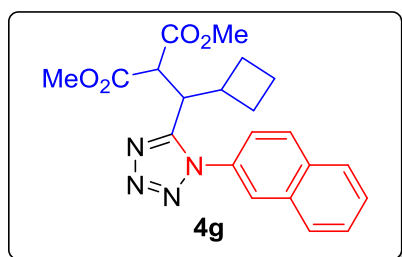

Coreless oil; 51% yield, 90:10 e.r.;  $[\alpha]_{\text{D}}^{21} = -59.7$  ( $c = 0.51$  in  $\text{CH}_2\text{Cl}_2$ ).

UPC<sup>2</sup> Phenomenex CHIRALCEL IC-3,  $\text{CO}_2/\text{CH}_3\text{OH} = 90/10$ , flow rate = 2.0 mL/min,  $\lambda = 254$  nm,  $t_R$  (minor) = 4.73 min,  $t_R$  (major) = 5.98 min.

IR (neat): 2955, 1746, 1512, 1439, 1314, 1250, 820 and 752  $\text{cm}^{-1}$ .

$^1\text{H}$  NMR (400 MHz,  $\text{CDCl}_3$ )  $\delta$  = 8.22 (s, 1H), 8.12 – 8.05 (m, 1H), 8.05 – 7.91 (m, 2H), 7.78 – 7.72 (m, 1H), 7.72 – 7.54 (m, 2H), 4.26 (d,  $J = 11.2$  Hz, 1H), 3.86 (dd,  $J =$

10.8, 8.8 Hz, 1H), 3.75 (s, 3H), 3.66 (s, 3H), 2.62 (dd,  $J = 16.4, 8.0$  Hz, 1H), 1.82 – 1.29 (m, 6H).

$^{13}\text{C}\{^1\text{H}\}$  NMR (101 MHz,  $\text{CDCl}_3$ )  $\delta = 168.4, 168.1, 155.7, 133.7, 133.1, 131.4, 130.3, 128.9, 128.2, 128.1, 127.7, 125.5, 123.2, 54.3, 53.1, 39.1, 38.5, 27.4, 25.4, 18.2$ .

HRMS (ESI-FT) calcd for  $\text{C}_{21}\text{H}_{23}\text{N}_4\text{O}_4^+$  ( $[\text{M}+\text{H}^+]$ ) = 395.1714, Found 395.1710.

Chiral HPLC spectrum **4g**:

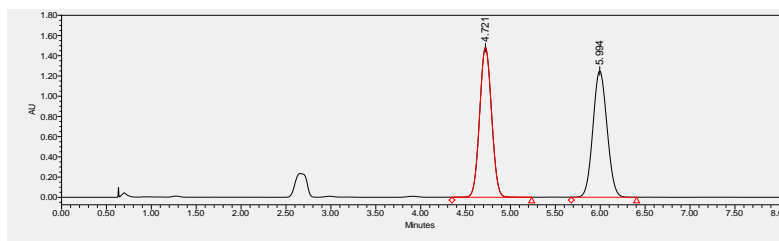

|   | Retention Time | % Area |
|---|----------------|--------|
| 1 | 4.721          | 50.05  |
| 2 | 5.994          | 49.95  |

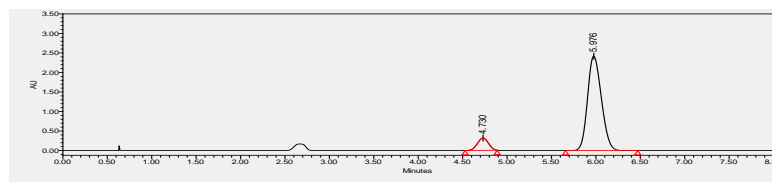

|   | Retention Time | % Area |
|---|----------------|--------|
| 1 | 4.730          | 9.43   |
| 2 | 5.976          | 90.57  |

**Dimethyl 2-{cyclopropyl[1-(naphthalen-2-yl)-1H-tetrazol-5-yl]methyl}malonate (**4h**)**

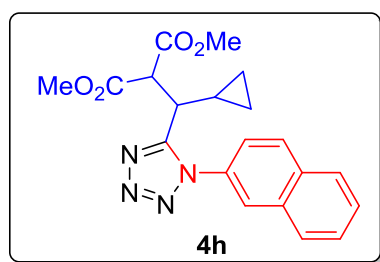

Coreless oil; 30% yield, 55:45 e.r.;  $[\alpha]_{\text{D}}^{21} = -17.0$  ( $c = 0.19$  in  $\text{CH}_2\text{Cl}_2$ ).

HPLC DAICEL CHIRALCEL IC,  $n$ -hexane/2-propanol = 70/30, flow rate = 1.0 mL/min,  $\lambda = 254$  nm,  $t_R$  (minor) = 12.58 min,  $t_R$  (major) = 20.87 min.

IR (neat): 2957, 1744, 1440, 1315, 1267, 1026 and  $752\text{ cm}^{-1}$ .

$^1\text{H}$  NMR (400 MHz,  $\text{CDCl}_3$ )  $\delta = 8.23 - 8.16$  (m, 1H),  $8.10 - 8.04$  (m, 1H),  $8.04 - 7.91$



(m, 2H), 7.73 (dd,  $J = 8.8, 2.0$  Hz, 1H), 7.70 – 7.53 (m, 2H), 4.47 (d,  $J = 11.2$  Hz, 1H), 3.79 (s, 3H), 3.69 (s, 3H), 3.29 – 3.18 (m, 1H), 1.11 – 0.98 (m, 1H), 0.52 – 0.41 (m, 1H), 0.33 – 0.23 (m, 1H), 0.00 – -0.06 (m, 1H), -0.21 – -0.33 (m, 1H).

$^{13}\text{C}\{^1\text{H}\}$  NMR (101 MHz,  $\text{CDCl}_3$ )  $\delta = 168.4, 168.3, 156.8, 133.8, 133.1, 131.3, 130.3, 128.8, 128.2, 128.1, 127.7, 125.4, 123.1, 77.48, 55.7, 53.1, 53.0, 38.6, 14.3, 5.2, 2.3$ .

HRMS (ESI-FT) calcd for  $\text{C}_{20}\text{H}_{21}\text{N}_4\text{O}_4^+$  ( $[\text{M}+\text{H}^+]$ ) = 381.1557, Found 381.1554.

Chiral HPLC spectrum **4h**:

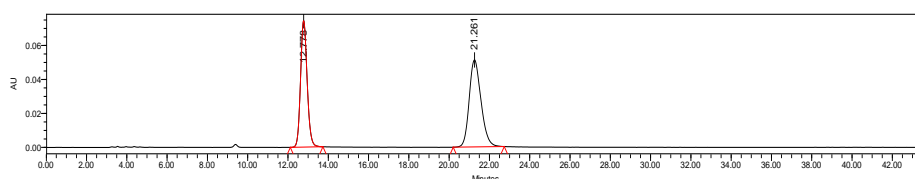

|   | Retention Time | Area    | % Area |
|---|----------------|---------|--------|
| 1 | 12.778         | 2085560 | 50.02  |
| 2 | 21.261         | 2083344 | 49.98  |

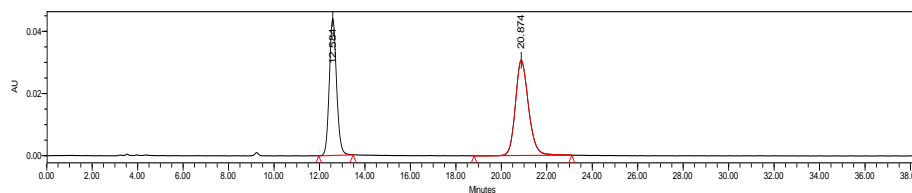

|   | Retention Time | Area    | % Area |
|---|----------------|---------|--------|
| 1 | 12.584         | 973348  | 44.28  |
| 2 | 20.874         | 1224872 | 55.72  |

**Dimethyl (S)-2-[2-methyl-1-[1-(naphthalen-2-yl)-1H-tetrazol-5-yl]propyl]malonate (4i)**

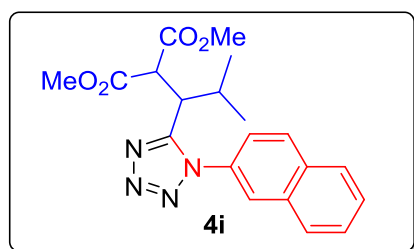

White solid; m.p. 124-126 °C; 72% yield, 96:4 e.r.;  $[\alpha]_D^{21} = -78.0$  ( $c = 0.47$  in  $\text{CH}_2\text{Cl}_2$ ).

HPLC DAICEL CHIRALCEL IC,  $n$ -hexane/2-propanol = 70/30, flow rate = 1.0 mL/min,  $\lambda = 254$  nm,  $t_R$  (minor) = 9.06 min,  $t_R$  (major) = 11.70 min.

**IR** (neat): 2960, 1746, 1512, 1440, 1308, 1265, 864, 814 and 752  $\text{cm}^{-1}$ .

**$^1\text{H}$  NMR** (400 MHz,  $\text{CDCl}_3$ )  $\delta$  = 8.27 (s, 1H), 8.10 – 8.02 (m, 1H), 8.02 – 7.89 (m, 2H), 7.81 – 7.74 (m, 1H), 7.71 – 7.57 (m, 2H), 4.49 (d,  $J$  = 11.6 Hz, 1H), 3.96 (dd,  $J$  = 11.6, 4.0 Hz, 1H), 3.79 (s, 3H), 3.69 (s, 3H), 2.01 – 1.79 (m, 1H), 0.93 (d,  $J$  = 6.8 Hz, 3H), 0.50 (d,  $J$  = 6.8 Hz, 3H).

**$^{13}\text{C}\{^1\text{H}\}$  NMR** (101 MHz,  $\text{CDCl}_3$ )  $\delta$  = 168.6, 168.3, 154.5, 133.7, 133.1, 131.7, 130.2, 128.8, 128.1, 128.0, 127.6, 125.5, 123.2, 54.1, 53.2, 39.6, 30.2, 21.3, 16.9.

**HRMS** (ESI-FT) calcd for  $\text{C}_{20}\text{H}_{23}\text{N}_4\text{O}_4^+$  ( $[\text{M}+\text{H}^+]$ ) = 383.1714, Found 383.1708.

Chiral HPLC spectrum **4i**:

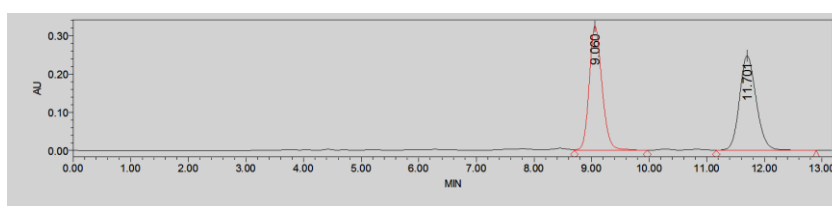

|   | Retention Time | Area    | % Area |
|---|----------------|---------|--------|
| 1 | 9.060          | 5029268 | 50.13  |
| 2 | 11.701         | 5003981 | 49.87  |

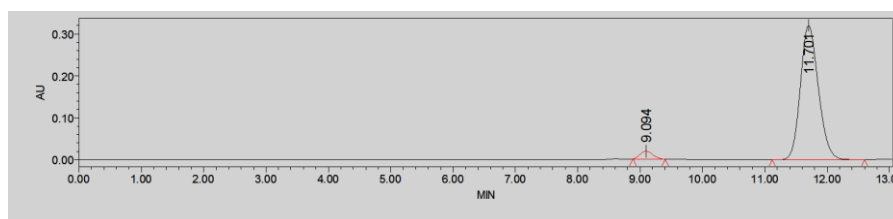

|   | Retention Time | Area    | % Area |
|---|----------------|---------|--------|
| 1 | 9.094          | 265343  | 3.97   |
| 2 | 11.701         | 6410010 | 96.03  |

**Dibenzyl 2-{2-methyl-1-[1-(naphthalen-2-yl)-1H-tetrazol-5-yl]propyl}malonate (4j)**

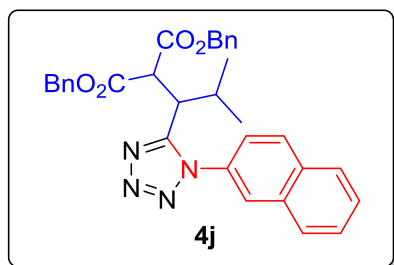

Coreless oil; 84% yield, 96:4 e.r.;  $[\alpha]_D^{21} = -71.8$  ( $c = 0.62$  in  $\text{CH}_2\text{Cl}_2$ ).

**HPLC** DAICEL CHIRALCEL IC,  $n$ -hexane/2-propanol = 70/30, flow rate = 1.0

mL/min,  $\lambda = 254$  nm,  $t_R$  (minor) = 10.85 min,  $t_R$  (major) = 13.06 min.

**IR** (neat): 2967, 1746, 1504, 1462, 1377, 1265, 1175, 748 and 698  $\text{cm}^{-1}$ .

**$^1\text{H}$  NMR** (400 MHz,  $\text{CDCl}_3$ )  $\delta = 8.18$  (s, 1H), 8.05 – 8.00 (m, 1H), 8.00 – 7.88 (m, 2H), 7.75 – 7.68 (m, 1H), 7.68 – 7.54 (m, 2H), 7.37 – 7.13 (m, 10H), 5.18 (s, 2H), 5.10 – 4.99 (m, 2H), 4.57 (d,  $J = 11.6$  Hz, 1H), 3.98 (dd,  $J = 11.6, 4.0$  Hz, 1H), 1.91 – 1.75 (m, 1H), 0.88 (d,  $J = 6.8$  Hz, 3H), 0.42 (d,  $J = 6.8$  Hz, 3H).

**$^{13}\text{C}\{^1\text{H}\}$  NMR** (101 MHz,  $\text{CDCl}_3$ )  $\delta = 167.9, 167.6, 154.4, 135.0, 134.9, 133.6, 133.0, 131.6, 130.1, 128.8, 128.7, 128.7, 128.6, 128.3, 128.1, 128.0, 127.6, 125.3, 123.2, 67.9, 67.8, 54.4, 39.6, 30.2, 21.3, 16.9$ .

**HRMS** (ESI-FT) calcd for  $\text{C}_{32}\text{H}_{31}\text{N}_4\text{O}_4^+$  ( $[\text{M}+\text{H}^+]$ ) = 535.2340, Found 535.2335.

Chiral HPLC spectrum **4j**:

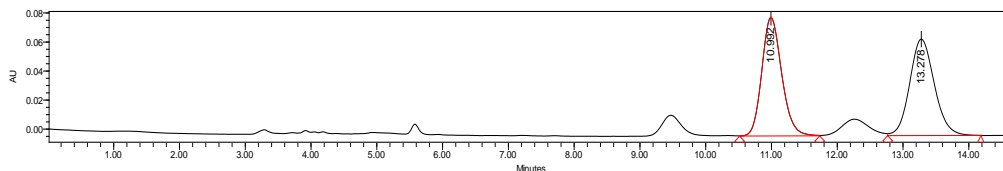

|   | Retention Time | Area    | % Area |
|---|----------------|---------|--------|
| 1 | 10.992         | 1708633 | 49.73  |
| 2 | 13.278         | 1727369 | 50.27  |

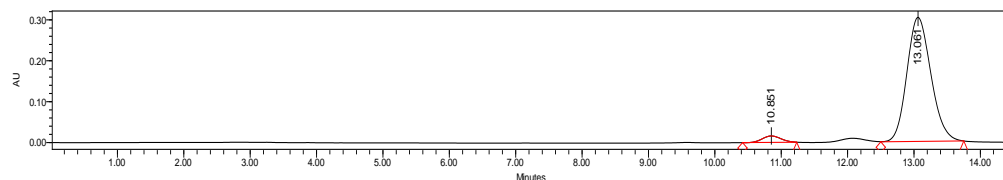

|   | Retention Time | Area    | % Area |
|---|----------------|---------|--------|
| 1 | 10.851         | 303703  | 3.83   |
| 2 | 13.061         | 7621541 | 96.17  |

**Dimethyl 2-{1-[1-(naphthalen-2-yl)-1H-tetrazol-5-yl]ethyl}malonate (4k)**

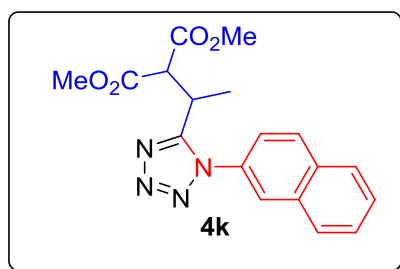

Coreless oil; 70% yield, 86.5:13.5 e.r.;  $[\alpha]_D^{21} = -66.0$  ( $c = 0.34$  in  $\text{CH}_2\text{Cl}_2$ ).

**HPLC** DAICEL CHIRALCEL IC, *n*-hexane/2-propanol = 70/30, flow rate = 1.0 mL/min,  $\lambda = 254$  nm,  $t_R$  (minor) = 15.30 min,  $t_R$  (major) = 24.69 min.

**IR** (neat): 2961, 1744, 1510, 1439, 1246, 1036 and 825  $\text{cm}^{-1}$ .

**$^1\text{H}$  NMR** (400 MHz,  $\text{CDCl}_3$ )  $\delta = 8.12 - 8.04$  (m, 2H), 8.01 - 7.89 (m, 2H), 7.74 - 7.59 (m, 3H), 4.32 (d,  $J = 11.2$  Hz, 1H), 3.88 - 3.82 (m, 1H), 3.77 (s, 3H), 3.66 (s, 3H), 1.23 (d,  $J = 6.8$  Hz, 3H).

**$^{13}\text{C}\{^1\text{H}\}$  NMR** (101 MHz,  $\text{CDCl}_3$ )  $\delta = 168.1, 158.0, 133.8, 133.1, 131.0, 130.5, 128.7, 128.2, 127.8, 125.1, 122.7, 56.0, 53.2, 53.1, 29.4, 18.3$ .

**HRMS** (ESI-FT) calcd for  $\text{C}_{18}\text{H}_{19}\text{N}_4\text{O}_4^+$  ( $[\text{M}+\text{H}^+]$ ) = 355.1401, Found 355.1404.

Chiral HPLC spectrum **4k**:

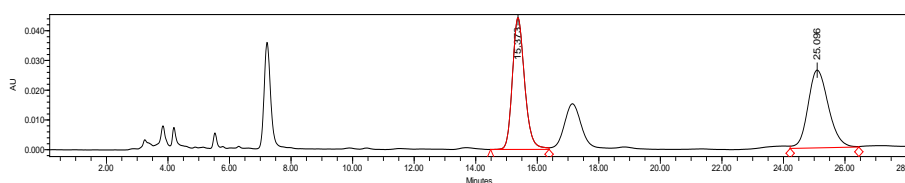

|   | Retention Time | Area    | % Area |
|---|----------------|---------|--------|
| 1 | 15.373         | 1225668 | 50.86  |
| 2 | 25.096         | 1184172 | 49.14  |

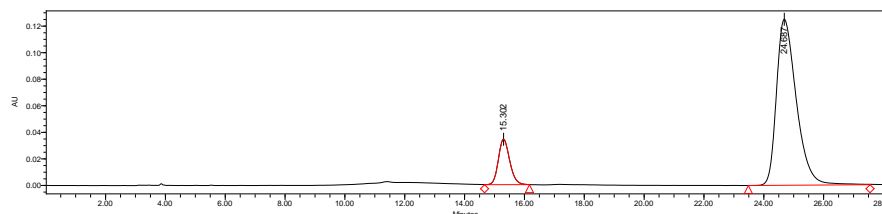

|   | Retention Time | Area    | % Area |
|---|----------------|---------|--------|
| 1 | 15.302         | 901217  | 13.51  |
| 2 | 24.687         | 5768336 | 86.49  |

**Dibenzyl 2-{3-methyl-1-[1-(naphthalen-2-yl)-1H-tetrazol-5-yl]butyl}malonate (4l)**

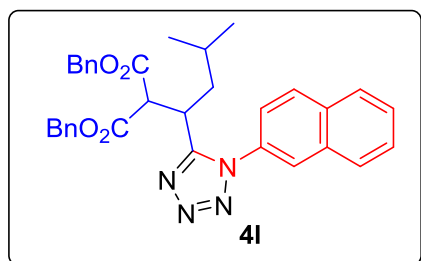

Coreless oil; 93% yield, 86:14 e.r.;  $[\alpha]_D^{21} = -34.8$  ( $c = 0.81$  in  $\text{CH}_2\text{Cl}_2$ ).

**HPLC** DAICEL CHIRALCEL IC, *n*-hexane/2-propanol = 70/30, flow rate = 1.0 mL/min,  $\lambda = 254$  nm,  $t_R$  (minor) = 18.17 min,  $t_R$  (major) = 13.15 min.

**IR** (neat): 2961, 1750, 1601, 1506, 1450, 1377, 1258, 1175, 820, 746 and 698  $\text{cm}^{-1}$ .

**$^1\text{H}$  NMR** (400 MHz,  $\text{CDCl}_3$ )  $\delta = 8.15$  (s, 1H), 8.08 – 8.00 (m, 1H), 7.99 – 7.88 (m, 2H), 7.74 – 7.56 (m, 3H), 7.37 – 7.15 (m, 10H), 5.26 – 4.98 (m, 4H), 4.39 (d,  $J = 11.2$  Hz, 1H), 3.99 – 3.84 (m, 1H), 1.76 – 1.66 (m, 1H), 1.29 – 1.18 (m, 1H), 1.00 – 0.81 (m, 1H), 0.60 (d,  $J = 6.8$  Hz, 3H), 0.17 (d,  $J = 6.8$  Hz, 3H).

**$^{13}\text{C}\{^1\text{H}\}$  NMR** (101 MHz,  $\text{CDCl}_3$ )  $\delta = 167.6, 167.4, 157.3, 135.0, 134.9, 133.6, 133.0, 131.3, 130.2, 128.8, 128.7, 128.6, 128.1, 128.1, 128.0, 127.6, 125.1, 122.9, 77.48, 67.8, 56.6, 43.1, 32.8, 25.3, 23.5, 20.7$ .

**HRMS** (ESI-FT) calcd for  $\text{C}_{33}\text{H}_{33}\text{N}_4\text{O}_4^+$  ( $[\text{M}+\text{H}^+]$ ) = 549.2496, Found 594.2502.

Chiral HPLC spectrum **4l**:

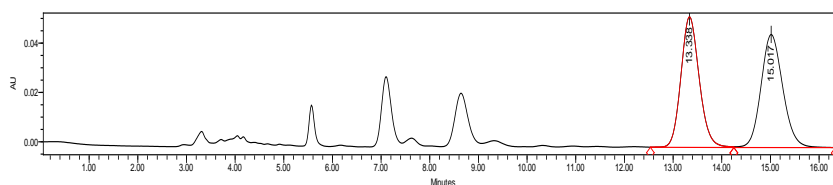

|   | Retention Time | Area    | % Area |
|---|----------------|---------|--------|
| 1 | 13.338         | 1380363 | 49.41  |
| 2 | 15.017         | 1413330 | 50.59  |

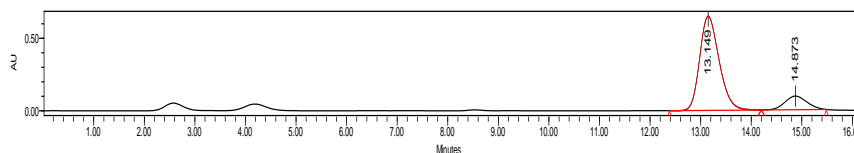

|   | Retention Time | Area     | % Area |
|---|----------------|----------|--------|
| 1 | 13.149         | 17340974 | 85.83  |
| 2 | 14.873         | 2862307  | 14.17  |

**Dibenzyl 2-{1-[1-(naphthalen-2-yl)-1H-tetrazol-5-yl]pentyl}malonate (4m)**

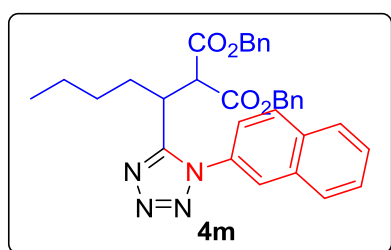

Coreless oil; 56% yield, 88.5:11.5 e.r.;  $[\alpha]_D^{21} = -38.8$  ( $c = 0.45$  in  $\text{CH}_2\text{Cl}_2$ ).

**HPLC** DAICEL CHIRALCEL IA,  $n$ -hexane/2-propanol = 70/30, flow rate = 1.0 mL/min,  $\lambda = 254$  nm,  $t_R$  (minor) = 6.36 min,  $t_R$  (major) = 8.32 min.

**IR** (neat): 2957, 1746, 1504, 1452, 1377, 1174, 746 and 698  $\text{cm}^{-1}$ .

**$^1\text{H}$  NMR** (400 MHz,  $\text{CDCl}_3$ )  $\delta = 8.08$  (s, 1H), 8.06 – 8.00 (m, 1H), 7.95 (dd,  $J = 17.2$ , 7.6 Hz, 2H), 7.71 – 7.57 (m, 3H), 7.38 – 7.14 (m, 10H), 5.19 (d,  $J = 12.8$  Hz, 2H), 5.11 – 4.99 (m, 2H), 4.44 (d,  $J = 11.2$  Hz, 1H), 3.93 – 3.77 (m, 3.8 Hz, 1H), 1.73 – 1.58 (m, 1H), 1.50 – 1.40 (m, 1H), 0.99 – 0.67 (m, 4H), 0.61 (t,  $J = 6.8$  Hz, 3H).

**$^{13}\text{C}\{^1\text{H}\}$  NMR** (101 MHz,  $\text{CDCl}_3$ )  $\delta = 167.6, 167.5, 156.9, 135.0, 134.9, 133.7, 133.0, 131.2, 130.2, 128.8, 128.7, 128.6, 128.5, 128.1, 127.7, 125.3, 123.0, 67.8, 55.8, 34.3, 32.7, 28.2, 22.2, 13.6$ .

**HRMS** (ESI-FT) calcd for  $\text{C}_{33}\text{H}_{33}\text{N}_4\text{O}_4^+$  ( $[\text{M}+\text{H}^+]$ ) = 549.2496, Found 549.2494.

Chiral HPLC spectrum **4m**:

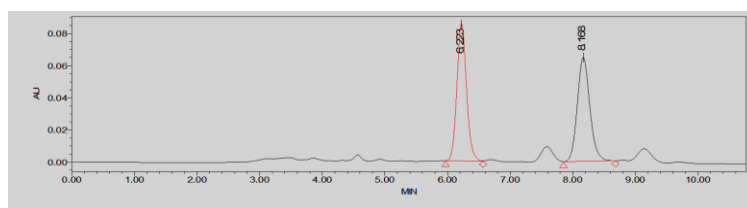

|   | Retention Time | Area   | % Area |
|---|----------------|--------|--------|
| 1 | 6.223          | 910227 | 50.37  |
| 2 | 8.168          | 896918 | 49.63  |

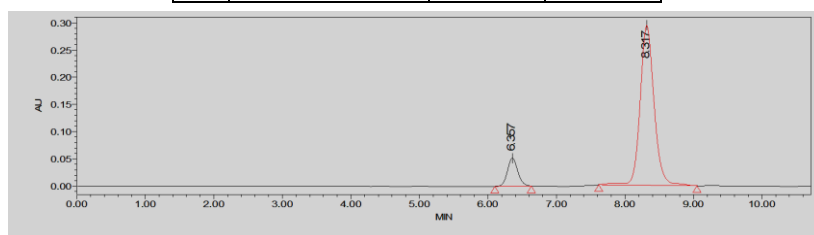

|   | Retention Time | Area    | % Area |
|---|----------------|---------|--------|
| 1 | 6.357          | 539083  | 11.48  |
| 2 | 8.317          | 4154746 | 88.52  |

**Dimethyl 2-{cyclohexyl[1-(4-nitrophenyl)-1H-tetrazol-5-yl]methyl}malonate (4n)**

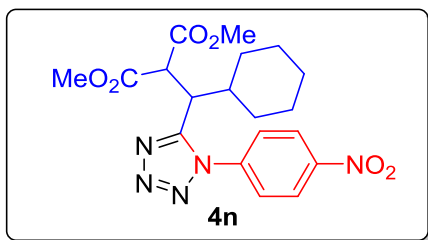

White solid; m.p. 92-96 °C; 50% yield, 90.5:9.5 e.r.;  $[\alpha]_D^{21} = -97.0$  ( $c = 0.27$  in  $\text{CH}_2\text{Cl}_2$ ).

**HPLC** DAICEL CHIRALCEL IC, *n*-hexane/2-propanol = 70/30, flow rate = 1.0 mL/min,  $\lambda = 254$  nm,  $t_R$  (minor) = 14.14 min,  $t_R$  (major) = 15.73 min.

**IR** (neat): 2930, 1744, 1605, 1531, 1443, 1346 and 860  $\text{cm}^{-1}$ .

**$^1\text{H}$  NMR** (400 MHz,  $\text{CDCl}_3$ )  $\delta = 8.61 - 8.34$  (m, 2H), 8.18 – 7.86 (m, 2H), 4.49 (dd,  $J = 11.6, 1.6$  Hz, 1H), 3.95 – 3.74 (m, 4H), 3.65 (s, 3H), 1.75 (dd,  $J = 26.0, 12.8$  Hz, 2H), 1.59 – 1.47 (m, 3H), 1.14 – 0.80 (m, 5H), 0.44 – 0.27 (m, 1H).

**$^{13}\text{C}\{^1\text{H}\}$  NMR** (101 MHz,  $\text{CDCl}_3$ )  $\delta = 168.9, 168.1, 155.1, 148.7, 139.3, 127.2, 125.4, 53.4, 40.4, 39.6, 31.9, 27.3, 26.3, 26.0, 25.7$ .

**HRMS** (ESI-FT) calcd for  $\text{C}_{19}\text{H}_{24}\text{N}_5\text{O}_6^+$  ( $[\text{M}+\text{H}^+]$ ) = 418.1721, Found 418.1719.

Chiral HPLC spectrum **4n**:

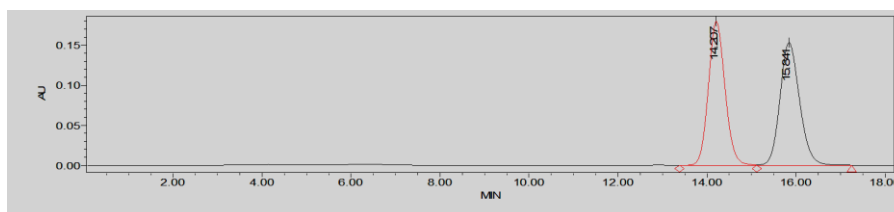

|   | Retention Time | Area    | % Area |
|---|----------------|---------|--------|
| 1 | 14.207         | 4694704 | 49.89  |
| 2 | 15.841         | 4714854 | 50.11  |

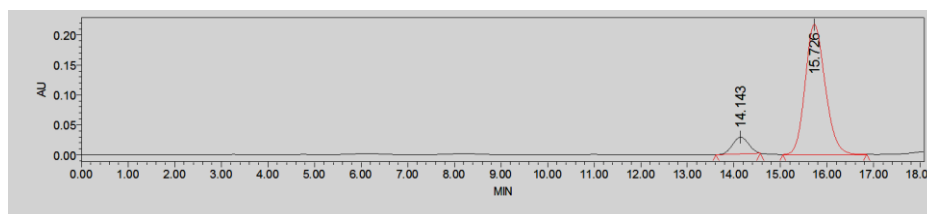

|   | Retention Time | Area    | % Area |
|---|----------------|---------|--------|
| 1 | 14.143         | 668070  | 9.34   |
| 2 | 15.726         | 6482836 | 90.66  |

**Dimethyl 2-[[1-(naphthalen-2-yl)-1H-tetrazol-5-yl](phenyl)methyl]malonate (4o)**

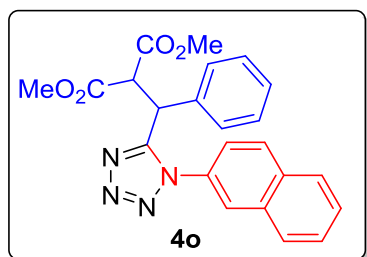

Coreless oil; 50% yield, 90.5:9.5 e.r.;  $[\alpha]_D^{26} = -25.6$  ( $c = 0.75$  in  $\text{CH}_2\text{Cl}_2$ ).

**HPLC** DAICEL CHIRALCEL IA, *n*-hexane/2-propanol = 80/20, flow rate = 1.0 mL/min,  $\lambda = 254$  nm,  $t_R$  (minor) = 7.70 min,  $t_R$  (major) = 7.77 min.

**IR** (neat): 1746, 1597, 1440, 1307, 1261, 1184, 864, 820 and  $750\text{ cm}^{-1}$ .

**$^1\text{H}$  NMR** (400 MHz,  $\text{CDCl}_3$ )  $\delta = 8.02 - 7.93$  (m, 2H),  $7.86 - 7.81$  (m,  $J = 7.7$ , 1H),  $7.78 - 7.74$  (m, 1H),  $7.67 - 7.58$  (m, 2H),  $7.40$  (dd,  $J = 8.8, 2.4$  Hz, 1H),  $7.27 - 7.22$  (m, 3H),  $7.19 - 7.13$  (m, 2H),  $4.88 - 4.82$  (m, 1H),  $4.79 - 4.70$  (m, 1H),  $3.71$  (s, 3H),  $3.42$  (s, 3H).

**$^{13}\text{C}\{^1\text{H}\}$  NMR** (101 MHz,  $\text{CDCl}_3$ )  $\delta = 167.9, 167.2, 155.9, 134.7, 133.8, 132.9, 130.7, 130.2, 129.1, 128.8, 128.7, 128.6, 128.1, 127.7, 125.2, 122.8, 57.0, 53.3, 52.8, 40.8$ .

**HRMS** (ESI-FT) calcd for  $\text{C}_{23}\text{H}_{21}\text{N}_4\text{O}_4^+$  ( $[\text{M}+\text{H}^+]$ ) = 417.1557, Found 417.1551.

Chiral HPLC spectrum **4o**:

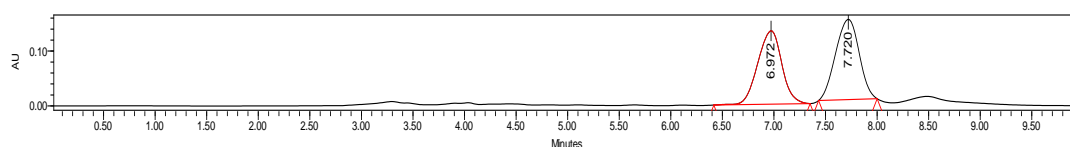

|   | Retention Time | Area    | % Area |
|---|----------------|---------|--------|
| 1 | 6.972          | 2165995 | 48.25  |
| 2 | 7.720          | 2322819 | 51.75  |

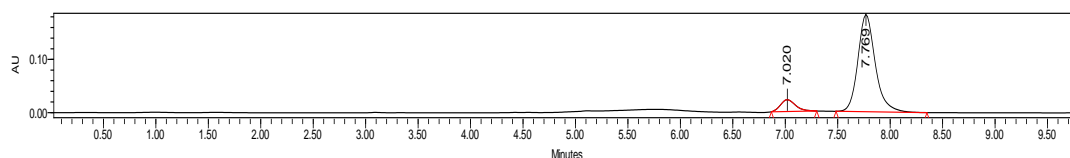

|   | Retention Time | Area    | % Area |
|---|----------------|---------|--------|
| 1 | 7.020          | 218983  | 9.46   |
| 2 | 7.769          | 2096223 | 90.54  |



**Dimethyl 2-[[1-(naphthalen-2-yl)-1H-tetrazol-5-yl](p-tolyl)methyl]malonate (4p)**

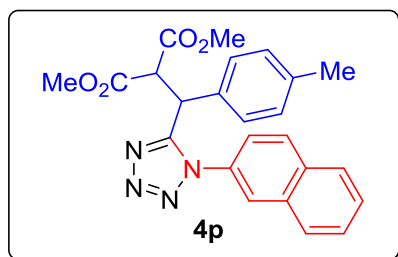

Coreless oil; 51% yield, 90.5:9.5 e.r.;  $[\alpha]_D^{26} = +63.7$  ( $c = 0.35$  in  $\text{CH}_2\text{Cl}_2$ ,  $\lambda = 405$  nm).

**HPLC** DAICEL CHIRALCEL IA, *n*-hexane/2-propanol = 80/20, flow rate = 1.0 mL/min,  $\lambda = 254$  nm,  $t_R$  (minor) = 7.21 min,  $t_R$  (major) = 7.90 min.

**IR** (neat): 1746, 1516, 1439, 1305, 1261, 1163, 812 and  $750\text{ cm}^{-1}$ .

**$^1\text{H}$  NMR** (400 MHz,  $\text{CDCl}_3$ )  $\delta = 8.03 - 7.93$  (m, 2H), 7.87 – 7.83 (m, 1H), 7.80 – 7.78 (m, 1H), 7.69 – 7.56 (m, 2H), 7.42 (dd,  $J = 8.4, 2.0$  Hz, 1H), 7.05 (s, 4H), 4.84 – 4.78 (m, 1H), 4.78 – 4.69 (m, 1H), 3.70 (s, 3H), 3.44 (s, 3H), 2.29 (s, 3H).

**$^{13}\text{C}\{^1\text{H}\}$  NMR** (101 MHz,  $\text{CDCl}_3$ )  $\delta = 168.0, 167.3, 156.1, 138.6, 133.8, 132.9, 131.6, 130.8, 130.2, 129.9, 128.6, 128.2, 128.1, 127.7, 125.2, 122.9, 57.1, 53.3, 53.2, 52.8, 40.5, 21.2$ .

**HRMS** (ESI-FT) calcd for  $\text{C}_{24}\text{H}_{23}\text{N}_4\text{O}_4^+$  ( $[\text{M}+\text{H}^+]$ ) = 431.1714, Found 431.1709.

Chiral HPLC spectrum **4p**:

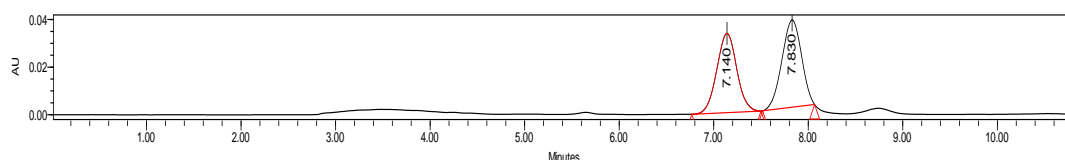

|   | Retention Time | Area   | % Area |
|---|----------------|--------|--------|
| 1 | 7.140          | 489335 | 49.01  |
| 2 | 7.830          | 509035 | 50.99  |

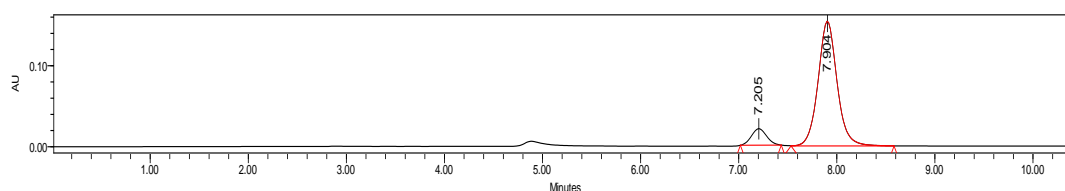

|   | Retention Time | Area    | % Area |
|---|----------------|---------|--------|
| 1 | 7.205          | 219193  | 9.57   |
| 2 | 7.904          | 2070546 | 90.43  |

### Dimethyl 2-[[1-(naphthalen-2-yl)-1H-tetrazol-5-yl](m-tolyl)methyl]malonate (**4q**)

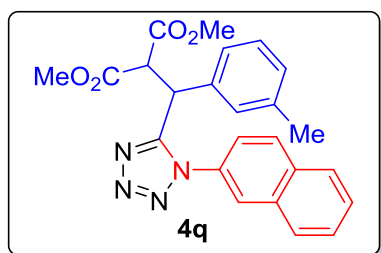

Coreless oil; 45% yield, 89:11 e.r.;  $[\alpha]_D^{26} = -24.0$  ( $c = 0.34$  in  $\text{CH}_2\text{Cl}_2$ ).

**HPLC** DAICEL CHIRALCEL IA, *n*-hexane/2-propanol = 80/20, flow rate = 1.0 mL/min,  $\lambda = 254$  nm,  $t_R$  (minor) = 6.28 min,  $t_R$  (major) = 6.52 min.

**IR** (neat): 1746, 1439, 1306, 1261, 1161 and  $822\text{ cm}^{-1}$ .

**$^1\text{H}$  NMR** (400 MHz,  $\text{CDCl}_3$ )  $\delta = 8.02 - 7.95$  (m, 2H), 7.86 – 7.81 (m, 1H), 7.76 – 7.73 (m, 1H), 7.68 – 7.58 (m, 2H), 7.41 (dd,  $J = 8.4, 2.0$  Hz, 1H), 7.16 – 7.04 (m, 2H), 6.99 – 6.96 (m, 1H), 6.94 – 6.89 (m, 1H), 4.82 – 4.77 (m, 1H), 4.77 – 4.71 (m, 1H), 3.70 (s, 3H), 3.43 (s, 3H), 2.23 (s, 3H).

**$^{13}\text{C}\{^1\text{H}\}$  NMR** (101 MHz,  $\text{CDCl}_3$ )  $\delta = 168.0, 167.3, 156.0, 139.0, 134.6, 133.8, 132.9, 130.8, 130.1, 129.5, 129.3, 129.0, 128.6, 128.2, 128.1, 127.7, 125.9, 125.3, 122.9, 57.01, 53.3, 52.8, 40.8, 21.4$ .

**HRMS** (ESI-FT) calcd for  $\text{C}_{24}\text{H}_{23}\text{N}_4\text{O}_4^+$  ( $[\text{M}+\text{H}^+]$ ) = 431.1714, Found 431.1707.

Chiral HPLC spectrum **4q**:

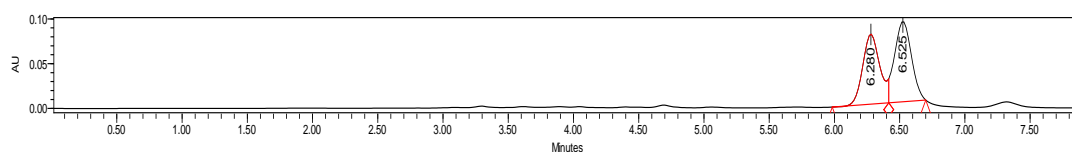

|   | Retention Time | Area   | % Area |
|---|----------------|--------|--------|
| 1 | 6.280          | 716729 | 47.16  |
| 2 | 6.525          | 803060 | 52.84  |

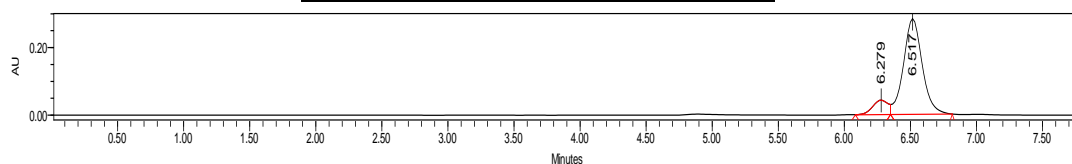

|   | Retention Time | Area    | % Area |
|---|----------------|---------|--------|
| 1 | 6.279          | 349428  | 11.12  |
| 2 | 6.517          | 2794153 | 88.88  |

**Dimethyl 2-((4-bromophenyl)[1-(naphthalen-2-yl)-1H-tetrazol-5-yl]methyl)malonate (4r)**

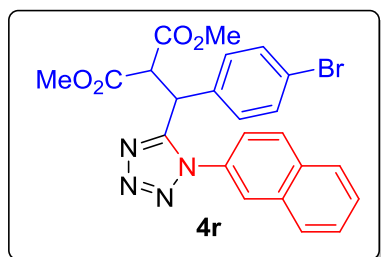

Coreless oil; 61% yield, 92.5:7.5 e.r.;  $[\alpha]_D^{26} = +63.3$  ( $c = 0.51$  in  $\text{CH}_2\text{Cl}_2$ ).

**HPLC** DAICEL CHIRALCEL IA, *n*-hexane/2-propanol = 80/20, flow rate = 1.0 mL/min,  $\lambda = 254$  nm,  $t_R$  (minor) = 7.69 min,  $t_R$  (major) = 8.33 min.

**IR** (neat): 1746, 1483, 1439, 1306, 1258, 1184, 1018, 860, 812 and  $750\text{ cm}^{-1}$ .

**$^1\text{H}$  NMR** (400 MHz,  $\text{CDCl}_3$ )  $\delta = 8.04 - 7.96$  (m, 2H),  $7.90 - 7.85$  (m, 1H),  $7.81 - 7.78$  (m, 1H),  $7.70 - 7.60$  (m, 2H),  $7.43 - 7.35$  (m, 3H),  $7.07 - 7.01$  (m, 2H),  $4.85 - 4.80$  (m, 1H),  $4.76 - 4.68$  (m, 1H),  $3.71$  (s, 3H),  $3.47$  (s, 3H).

**$^{13}\text{C}\{^1\text{H}\}$  NMR** (101 MHz,  $\text{CDCl}_3$ )  $\delta = 167.7, 167.1, 155.6, 133.9, 133.7, 132.9, 132.4, 130.6, 130.4, 130.3, 128.6, 128.3, 128.2, 127.9, 125.3, 123.0, 122.7, 56.8, 53.4, 53.0, 40.2$ .

**HRMS** (ESI-FT) calcd for  $\text{C}_{23}\text{H}_{20}^{79}\text{BrN}_4\text{O}_4^+$  ( $[\text{M}+\text{H}^+]$ ) = 495.0062, Found 495.0658;

$\text{C}_{23}\text{H}_{20}^{81}\text{BrN}_4\text{O}_4^+$  ( $[\text{M}+\text{H}^+]$ ) = 497.0642, Found 497.0638.

Chiral HPLC spectrum **4r**:

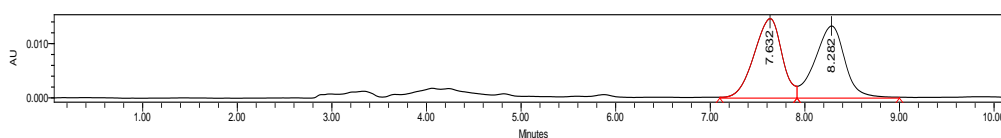

|   | Retention Time | Area   | % Area |
|---|----------------|--------|--------|
| 1 | 7.632          | 301717 | 50.73  |
| 2 | 8.282          | 293056 | 49.27  |

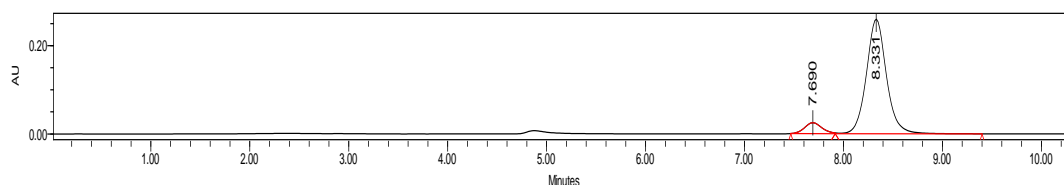

|   | Retention Time | Area    | % Area |
|---|----------------|---------|--------|
| 1 | 7.690          | 298305  | 7.56   |
| 2 | 8.331          | 3645054 | 92.44  |

**Dimethyl 2-((4-chlorophenyl)[1-(naphthalen-2-yl)-1H-tetrazol-5-yl]methyl)malonate (4s)**

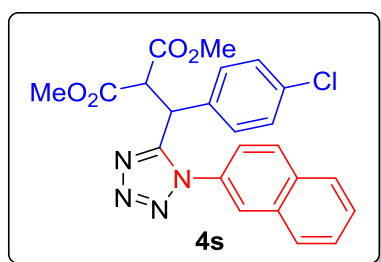

Coreless oil; 56% yield, 91.5:8.5 e.r.;  $[\alpha]_D^{26} = +27.5$  ( $c = 0.35$  in  $\text{CH}_2\text{Cl}_2$ ).

**HPLC** DAICEL CHIRALCEL IA, *n*-hexane/2-propanol = 70/30, flow rate = 1.0 mL/min,  $\lambda = 254$  nm,  $t_R$  (minor) = 6.18 min,  $t_R$  (major) = 6.62 min.

**IR** (neat): 1746, 1483, 1439, 1306, 1258, 1184, 812 and 750  $\text{cm}^{-1}$ .

**$^1\text{H}$  NMR** (400 MHz,  $\text{CDCl}_3$ )  $\delta = 8.05 - 7.95$  (m, 2H), 7.91 - 7.85 (m, 1H), 7.79 (d,  $J = 2.0$  Hz, 1H), 7.70 - 7.60 (m, 2H), 7.40 (dd,  $J = 8.8, 2.0$  Hz, 1H), 7.25 - 7.19 (m, 2H), 7.16 - 7.05 (m, 2H), 4.86 - 4.80 (m, 1H), 4.76 - 4.68 (m, 1H), 3.71 (s, 3H), 3.47 (s, 3H).

**$^{13}\text{C}\{^1\text{H}\}$  NMR** (101 MHz,  $\text{CDCl}_3$ )  $\delta = 167.7, 167.1, 155.7, 134.9, 133.9, 133.2, 132.9, 130.6, 130.4, 130.1, 129.4, 128.6, 128.3, 128.2, 127.9, 125.3, 122.7, 56.9, 53.4, 53.4, 53.0, 40.1$ .

**HRMS** (ESI-FT) calcd for  $\text{C}_{23}\text{H}_{20}^{35}\text{ClN}_4\text{O}_4^+$  ( $[\text{M}+\text{H}^+]$ ) = 451.1168, Found 451.1168;  $\text{C}_{23}\text{H}_{20}^{37}\text{ClN}_4\text{O}_4^+$  ( $[\text{M}+\text{H}^+]$ ) = 453.1138, Found 453.1139.

Chiral HPLC spectrum **4s**:

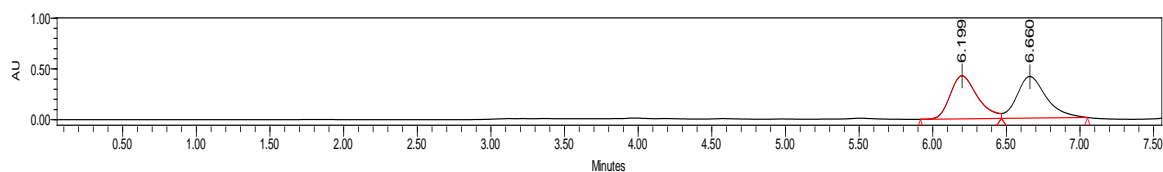

|   | Retention Time | % Area | % Height |
|---|----------------|--------|----------|
| 1 | 6.199          | 48.99  | 50.85    |
| 2 | 6.660          | 51.01  | 49.15    |

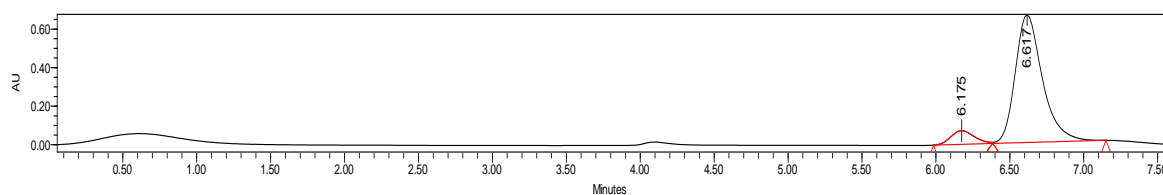

|   | Retention Time | % Area | % Height |
|---|----------------|--------|----------|
| 1 | 6.175          | 8.49   | 9.68     |
| 2 | 6.617          | 91.51  | 90.32    |

**Dimethyl 2-((3-chlorophenyl)[1-(naphthalen-2-yl)-1H-tetrazol-5-yl]methyl)malonate (**4t**)**

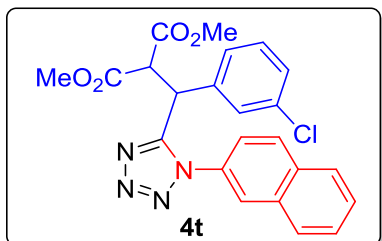

Coreless oil; 40% yield, 88.5:11.5 e.r.;  $[\alpha]_D^{26} = -11.1$  ( $c = 0.25$  in  $\text{CH}_2\text{Cl}_2$ ).

**HPLC** DAICEL CHIRALCEL IC, *n*-hexane/2-propanol = 70/30, flow rate = 1.0 mL/min,  $\lambda = 254$  nm,  $t_R$  (minor) = 9.02 min,  $t_R$  (major) = 14.87 min.

**IR** (neat): 1748, 1439, 1302, 1260, 1186, 1161, 820, 754 and 696  $\text{cm}^{-1}$ .

**$^1\text{H}$  NMR** (400 MHz,  $\text{CDCl}_3$ )  $\delta = 8.06 - 7.94$  (m, 2H), 7.90 – 7.86 (m, 1H), 7.80 – 7.77 (m, 1H), 7.70 – 7.60 (m, 2H), 7.40 (dd,  $J = 8.4, 2.0$  Hz, 1H), 7.28 – 7.24 (m, 1H), 7.22 – 7.16 (m, 2H), 7.10 – 7.04 (m, 1H), 4.86 – 4.78 (m, 1H), 4.77 – 4.67 (m, 1H), 3.71 (s, 3H), 3.47 (s, 3H).

**$^{13}\text{C}\{^1\text{H}\}$  NMR** (101 MHz,  $\text{CDCl}_3$ )  $\delta = 167.7, 167.0, 155.5, 136.7, 135.1, 133.9, 132.9, 130.6, 130.4, 129.1, 129.0, 128.6, 128.3, 128.2, 127.9, 127.0, 125.3, 122.7, 56.9, 53.4, 53.0, 40.4$ .

**HRMS** (ESI-FT) calcd for  $\text{C}_{23}\text{H}_{20}^{35}\text{ClN}_4\text{O}_4^+$  ( $[\text{M}+\text{H}^+]$ ) = 451.1168, Found 451.1161;  $\text{C}_{23}\text{H}_{20}^{37}\text{ClN}_4\text{O}_4^+$  ( $[\text{M}+\text{H}^+]$ ) = 453.1138, Found 453.1138.

Chiral HPLC spectrum **4t**:

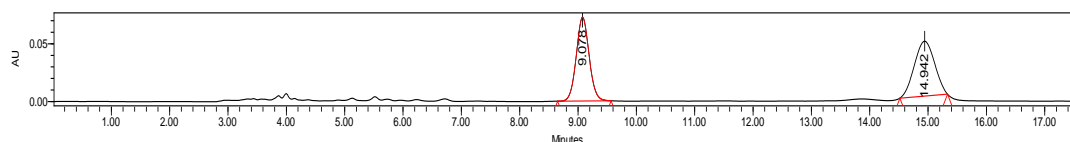

|   | Retention Time | Area    | % Area |
|---|----------------|---------|--------|
| 1 | 9.078          | 1111542 | 49.29  |
| 2 | 14.942         | 1143696 | 50.71  |

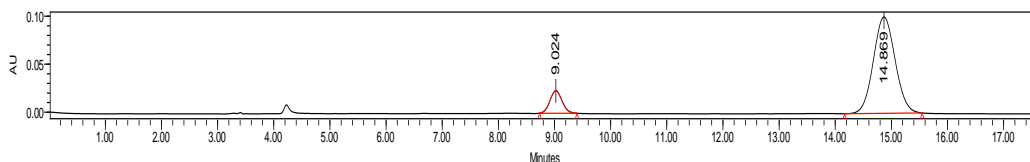

|   | Retention Time | Area    | % Area |
|---|----------------|---------|--------|
| 1 | 9.024          | 350564  | 11.48  |
| 2 | 14.869         | 2702253 | 88.52  |

**Dimethyl 2-((2-chlorophenyl)[1-(naphthalen-2-yl)-1H-tetrazol-5-yl]methyl)malonate (**4u**)**

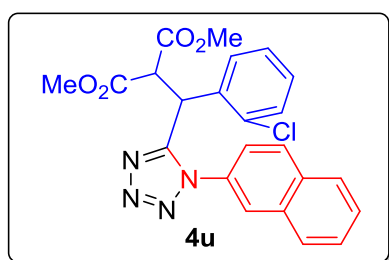

Coreless oil; 33% yield, 77:23 e.r.;  $[\alpha]_D^{26} = -55.7$  ( $c = 0.34$  in  $\text{CH}_2\text{Cl}_2$ ).

**HPLC** DAICEL CHIRALCEL IA, *n*-hexane/2-propanol = 80/20, flow rate = 1.0 mL/min,  $\lambda = 254$  nm,  $t_R$  (minor) = 8.16 min,  $t_R$  (major) = 9.53 min.

**IR** (neat): 1746, 1439, 1303, 1250, 1184, 1163, 1036, 862, 820 and  $756\text{ cm}^{-1}$ .

**$^1\text{H}$  NMR** (400 MHz,  $\text{CDCl}_3$ )  $\delta = 8.03 - 7.92$  (m, 2H), 7.90 – 7.85 (m, 1H), 7.83 – 7.79 (m, 1H), 7.67 – 7.57 (m, 3H), 7.43 (dd,  $J = 8.8, 2.4$  Hz, 1H), 7.28 – 7.13 (m, 3H), 5.60 (d,  $J = 12.0$  Hz, 1H), 4.75 (d,  $J = 11.8$  Hz, 1H), 3.74 (s, 3H), 3.45 (s, 3H).

**$^{13}\text{C}\{^1\text{H}\}$  NMR** (101 MHz,  $\text{CDCl}_3$ )  $\delta = 167.9, 166.6, 156.1, 133.9, 133.8, 133.0, 132.5, 130.8, 130.6, 130.2, 130.0, 129.9, 128.7, 128.1, 127.9, 127.6, 125.5, 122.9, 56.8, 53.3, 52.8, 36.0$ .

**HRMS** (ESI-FT) calcd for  $\text{C}_{23}\text{H}_{20}^{35}\text{ClN}_4\text{O}_4^+$  ( $[\text{M}+\text{H}^+]$ ) = 451.1168, Found 451.1163;

$\text{C}_{23}\text{H}_{20}^{37}\text{ClN}_4\text{O}_4^+$  ( $[\text{M}+\text{H}^+]$ ) = 453.1138, Found 453.1140.

Chiral HPLC spectrum **4u**:

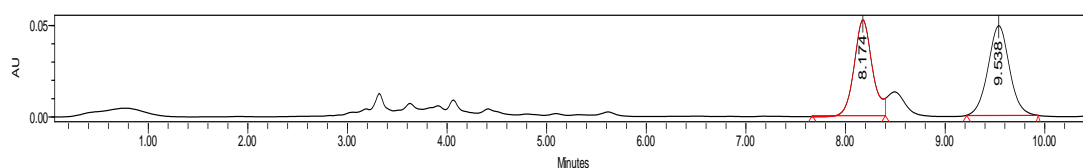

|   | Retention Time | Area   | % Area |
|---|----------------|--------|--------|
| 1 | 8.174          | 661933 | 47.43  |
| 2 | 9.538          | 733629 | 52.57  |

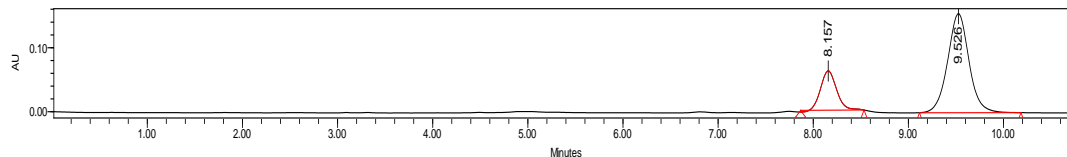

|   | Retention Time | Area    | % Area |
|---|----------------|---------|--------|
| 1 | 8.157          | 726705  | 23.16  |
| 2 | 9.526          | 2411451 | 76.84  |

**Dimethyl 2-{naphthalen-2-yl}[1-(naphthalen-2-yl)-1H-tetrazol-5-yl]methyl}malonate (**4v**)**

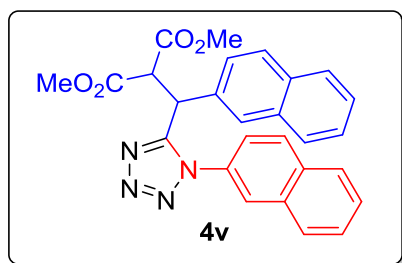

Coreless oil; 39% yield, 88:12 e.r.;  $[\alpha]_D^{26} = +73.0$  ( $c = 0.22$  in  $\text{CH}_2\text{Cl}_2$ ).

**HPLC** DAICEL CHIRALCEL IA, *n*-hexane/2-propanol = 80/20, flow rate = 1.0 mL/min,  $\lambda = 254$  nm,  $t_R$  (minor) = 8.71 min,  $t_R$  (major) = 9.96 min.

**IR** (neat): 1746, 1439, 1312, 1265, 1161, 816 and 748  $\text{cm}^{-1}$ .

**$^1\text{H}$  NMR** (400 MHz,  $\text{CDCl}_3$ )  $\delta = 8.02 - 7.94$  (m, 2H), 7.82 – 7.73 (m, 4H), 7.70 – 7.57 (m, 4H), 7.72 – 7.44 (m, 2H), 7.39 (dd,  $J = 8.8, 2.0$  Hz, 1H), 7.33 (dd,  $J = 8.8, 2.0$  Hz, 1H), 5.05 – 4.97 (m, 1H), 4.92 – 4.81 (m, 1H), 3.73 (s, 3H), 3.36 (s, 3H).

**$^{13}\text{C}\{^1\text{H}\}$  NMR** (101 MHz,  $\text{CDCl}_3$ )  $\delta = 167.9, 167.3, 156.0, 133.9, 133.3, 133.1, 132.9, 132.1, 130.8, 130.2, 129.1, 128.6, 128.4, 128.2, 128.1, 127.8, 127.8, 126.9, 126.8, 125.8, 125.4, 122.9, 57.1, 53.4, 52.9, 41.0$ .

**HRMS** (ESI-FT) calcd for  $\text{C}_{27}\text{H}_{23}\text{N}_4\text{O}_4^+$  ( $[\text{M}+\text{H}^+]$ ) = 467.1714, Found 467.1709.

Chiral HPLC spectrum **4v**:

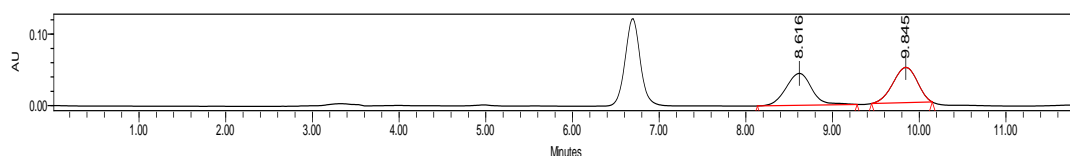

|   | Retention Time | Area   | % Area |
|---|----------------|--------|--------|
| 1 | 8.616          | 925951 | 49.02  |
| 2 | 9.845          | 963032 | 50.98  |

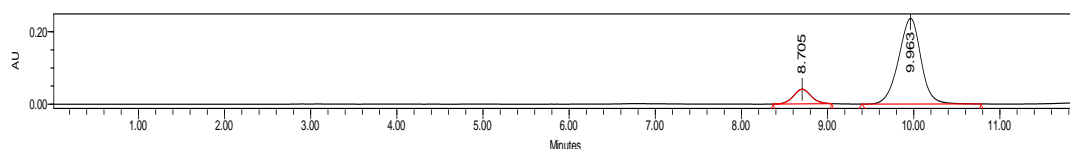

|   | Retention Time | Area    | % Area |
|---|----------------|---------|--------|
| 1 | 8.705          | 586045  | 12.08  |
| 2 | 9.963          | 4265645 | 87.92  |

**Dimethyl 2-((1*S*,3*S*)-3,7-dimethyl-1-[1-(naphthalen-2-yl)-1*H*-tetrazol-5-yl]oct-6-en-1-yl)**

**malonate (4w)**

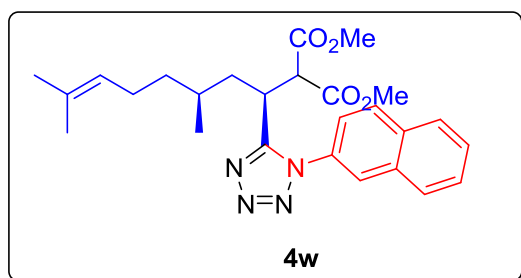

Coreless oil; 47% yield, 2.8:1 d.r.;  $[\alpha]_D^{25} = -59.51$  ( $c = 0.37$  in  $\text{CH}_2\text{Cl}_2$ ).

**IR** (neat): 1752, 1737, 1437, 1274, 1254, 1155, 1104, 818 and  $750\text{ cm}^{-1}$ .

**$^1\text{H}$  NMR** (400 MHz,  $\text{CDCl}_3$ )  $\delta = 8.28 - 8.20$  (m, 1H), 8.10 – 8.04 (m, 1H), 8.01 – 7.92 (m, 2H), 7.81 (dd,  $J = 8.8, 2.2$  Hz, 0.74H), 7.75 (dd,  $J = 8.8, 2.2$  Hz, 0.29H), 7.69 – 7.58 (m, 2H), 4.82 (td,  $J = 7.0, 3.4$  Hz, 0.26H), 4.35 – 4.28 (m, 1H), 4.23 (td,  $J = 7.0, 6.2, 3.4$  Hz, 1H), 4.05 – 3.90 (m, 1H), 3.78 (s, 3H), 3.67 (s, 3H), 1.87 – 1.60 (m, 4H), 1.53 – 1.40 (m, 3H), 1.30 (s, 2H), 1.23 – 1.13 (m, 1H), 0.88 – 0.71 (m, 1H), 0.62 (d,  $J = 6.4$  Hz, 2H), 0.24 (d,  $J = 6.4$  Hz, 0.78H).

**$^{13}\text{C}\{^1\text{H}\}$  NMR** (101 MHz,  $\text{CDCl}_3$ )  $\delta = 168.4, 168.2, 157.4, 157.3, 133.7, 133.1, 131.8, 131.4, 131.2, 130.4, 130.3, 128.8, 128.2, 128.1, 127.7, 125.3, 124.9, 124.0, 123.9,$



123.0, 122.7, 56.3, 53.2, 41.9, 41.4, 37.6, 35.4, 32.5, 30.4, 29.6, 25.8, 25.6, 25.1, 25.0, 20.2, 18.4, 17.8, 17.4.

**HRMS** (ESI-FT) calcd for  $C_{26}H_{33}N_4O_4^+$  ( $[M+H^+]$ ) = 465.2496, Found 465.2496.

**Dimethyl 2-{1-cyclohexyl-2-[1-(naphthalen-2-yl)-1H-tetrazol-5-yl]-2-(naphthalen-2-ylimino)ethyl}malonate (5a)**

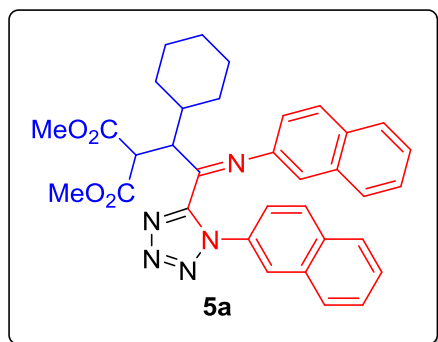

Yellow solid; m.p. 54-56 °C; 91% yield, 94.5:5.5 e.r.;  $[\alpha]_D^{21} = -158.8$  ( $c = 0.67$  in  $CH_2Cl_2$ ).

**HPLC** DAICEL CHIRALCEL IC, *n*-hexane/2-propanol = 70/30, flow rate = 1.0 mL/min,  $\lambda = 254$  nm,  $t_R$  (minor) = 9.13 min,  $t_R$  (major) = 11.64 min.

**IR** (neat): 2930, 2855, 1738, 1630, 1510, 1439, 1265, 1155, 856, 814 and 745  $cm^{-1}$ .

**$^1H$  NMR** (400 MHz,  $CDCl_3$ )  $\delta = 7.70 - 7.69$ (m, 1H), 7.57 – 7.46 (m, 4H), 7.36 – 7.27 (m, 3H), 7.26 – 7.20 (m, 1H), 7.03 (dd,  $J = 18.4, 8.4$  Hz, 2H), 6.73 (d,  $J = 8.8$  Hz, 1H), 6.27 (s, 1H), 6.07 (d,  $J = 8.6$  Hz, 1H), 4.35 (d,  $J = 8.8$  Hz, 1H), 4.13 (dd,  $J = 8.8, 4.8$  Hz, 1H), 3.79 (s, 3H), 3.72 (s, 3H), 2.21 (s, 1H), 2.06 – 1.85 (m, 4H), 1.78 – 1.72 (m, 1H), 1.41 – 1.19 (m, 5H).

**$^{13}C\{^1H\}$  NMR** (101 MHz,  $CDCl_3$ )  $\delta = 169.8, 169.3, 156.7, 150.1, 145.7, 133.3, 133.2, 132.6, 131.0, 129.1, 128.5, 128.3, 127.7, 127.6, 127.4, 127.4, 127.2, 126.4, 125.5, 122.9, 121.0, 119.3, 115.9, 53.3, 53.0, 52.8, 52.5, 40.0, 31.3, 29.3, 27.0, 26.9, 26.4$ .

**HRMS** (ESI-FT) calcd for  $C_{34}H_{34}N_5O_4^+$  ( $[M+H^+]$ ) = 576.2605, Found 576.2604.

Chiral HPLC spectrum **5a**:

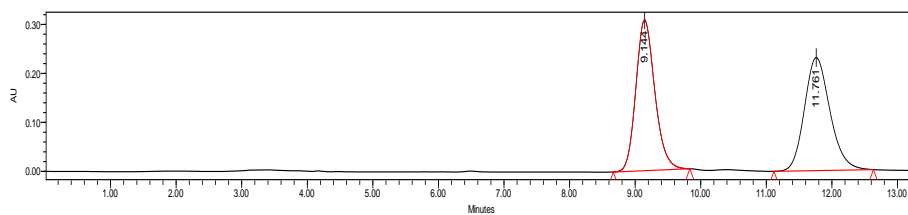

|   | Retention Time | Area    | % Area |
|---|----------------|---------|--------|
| 1 | 9.144          | 6183501 | 49.78  |
| 2 | 11.761         | 6238907 | 50.22  |

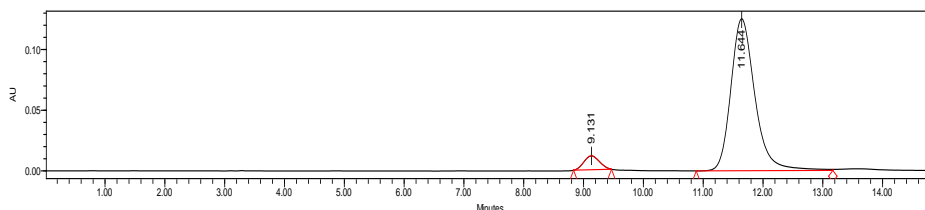

|   | Retention Time | Area    | % Area |
|---|----------------|---------|--------|
| 1 | 9.131          | 206953  | 5.59   |
| 2 | 11.644         | 3495720 | 94.41  |

**Dimethyl 2-{1-cycloheptyl-2-[1-(naphthalen-2-yl)-1H-tetrazol-5-yl]-2-(naphthalen-2-ylimino)ethyl}malonate (5b)**

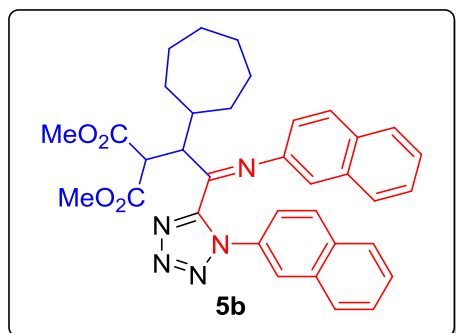

Yellow solid; m.p. 100-102 °C; 84% yield, 93.5:6.5 e.r.;  $[\alpha]_D^{21} = -184.3$  ( $c = 0.78$  in  $\text{CH}_2\text{Cl}_2$ ).

**HPLC** DAICEL CHIRALCEL IC, *n*-hexane/2-propanol = 70/30, flow rate = 1.0 mL/min,  $\lambda = 254$  nm,  $t_R$  (minor) = 8.64 min,  $t_R$  (major) = 12.34 min.

**IR** (neat): 2926, 1738, 1510, 1439, 1265, 1152, 1028, 858, 814 and 746  $\text{cm}^{-1}$ .

**$^1\text{H}$  NMR** (400 MHz,  $\text{CDCl}_3$ )  $\delta = 7.74 - 7.70$  (m, 1H), 7.57 - 7.44 (m, 4H), 7.39 - 7.27 (m, 3H), 7.12 - 7.00 (m, 1H), 7.10 - 7.01 (m, 2H), 6.28 (s, 1H), 6.08 (d,  $J = 8.2$  Hz, 1H), 4.30 - 4.40 (m, 1H), 4.28 - 4.16 (m, 1H), 3.80 (s, 3H), 3.69 (s, 3H), 2.40 (s, 1H), 2.00 (s, 2H), 1.82 (s, 2H), 1.69 - 1.45 (m, 8H).

$^{13}\text{C}\{^1\text{H}\}$  NMR (101 MHz,  $\text{CDCl}_3$ )  $\delta$  = 169.6, 169.3, 156.8, 149.9, 145.5, 133.3, 133.2, 132.6, 130.9, 130.9, 129.2, 128.5, 128.3, 127.7, 127.6, 127.5, 127.4, 127.3, 126.4, 125.5, 122.9, 121.0, 119.3, 116.0, 54.2, 52.9, 52.8, 52.6, 41.2, 32.4, 30.1, 27.7, 27.6, 27.5, 27.5.

HRMS (ESI-FT) calcd for  $\text{C}_{35}\text{H}_{36}\text{N}_5\text{O}_4^+$  ( $[\text{M}+\text{H}^+]$ ) = 590.2762, Found 590.2756.

Chiral HPLC spectrum **5b**:

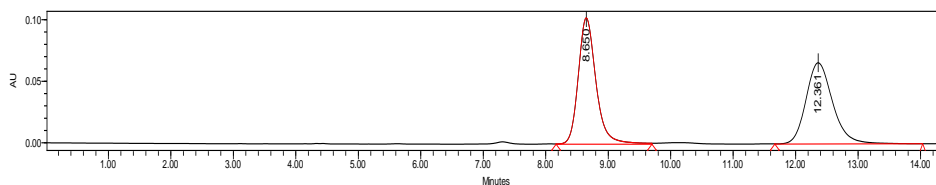

|   | Retention Time | Area    | % Area |
|---|----------------|---------|--------|
| 1 | 8.650          | 2025687 | 50.90  |
| 2 | 12.361         | 1953803 | 49.10  |

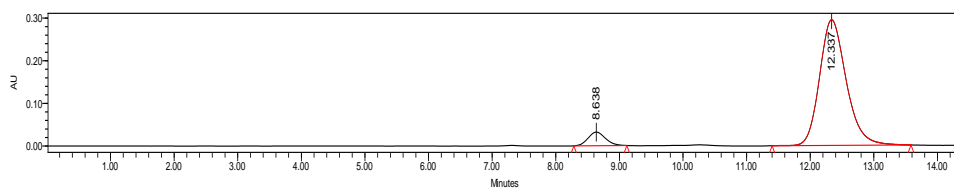

|   | Retention Time | Area    | % Area |
|---|----------------|---------|--------|
| 1 | 8.638          | 605803  | 6.60   |
| 2 | 12.337         | 8566409 | 93.40  |

Dimethyl 2-{1-cyclopentyl-2-[1-(naphthalen-2-yl)-1H-tetrazol-5-yl]-2-(naphthalen-2-ylimino)ethyl}malonate (**5c**)

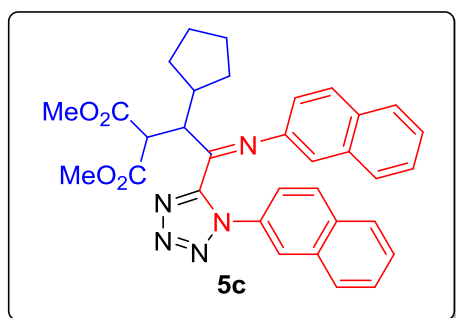

Yellow solid; m.p. 52-54 °C; 98% yield, 90:10 e.r.;  $[\alpha]_D^{21} = +10.0$  ( $c = 1.02$  in  $\text{CH}_2\text{Cl}_2$ ).

HPLC DAICEL CHIRALCEL IE, *n*-hexane/2-propanol = 70/30, flow rate = 1.0

mL/min,  $\lambda = 254$  nm,  $t_R$  (minor) = 11.00 min,  $t_R$  (major) = 11.48 min.

**IR** (neat): 2955, 1740, 1510, 1439, 1267, 1157, 858, 816 and 746  $\text{cm}^{-1}$ .

**$^1\text{H}$  NMR** (400 MHz,  $\text{CDCl}_3$ )  $\delta = 8.12$  (s, 0.24H), 7.94 – 7.84 (m, 1H), 7.75 – 7.62 (m, 2.52H), 7.58 – 7.12 (m, 9.26H), 7.01 (d,  $J = 8.0$  Hz, 1H), 6.94 (d,  $J = 8.4$  Hz, 1H), 6.78 (d,  $J = 8.4$  Hz, 1H), 6.25 (s, 1H), 6.05 (d,  $J = 8.8$  Hz, 1H), 4.59 (d,  $J = 9.6$  Hz, 0.22H), 4.20 (d,  $J = 4.4$  Hz, 1H), 4.00 (dd,  $J = 9.6, 4.4$  Hz, 1.25H), 3.80 (s, 3H), 3.72 (m, 3.76 – 3.67, 1.32H), 2.84 – 2.46 (m, 1H), 2.61 – 2.55 (m, 0.21H), 2.18 – 2.06 (m, 1H), 2.02 – 1.92 (m, 1H), 1.87 – 1.75 (m, 2.75H), 1.72 – 1.59 (m, 2.97H), 1.41 (m, 1H), 0.99 – 0.69 (m, 1.5H).

**$^{13}\text{C}\{^1\text{H}\}$  NMR** (101 MHz,  $\text{CDCl}_3$ )  $\delta = 170.1, 169.0, 157.3, 150.5, 146.0, 133.2, 133.1, 132.7, 131.2, 131.0, 128.9, 128.5, 128.4, 127.6, 127.4, 127.4, 126.3, 125.5, 123.0, 121.1, 119.1, 115.6, 54.9, 53.0, 43.2, 31.2, 30.9, 25.3, 25.1$ .

**HRMS** (ESI-FT) calcd for  $\text{C}_{33}\text{H}_{32}\text{N}_5\text{O}_4^+$  ( $[\text{M}+\text{H}^+]$ ) = 562.2449, Found 562.2445.

Chiral HPLC spectrum **5c**:

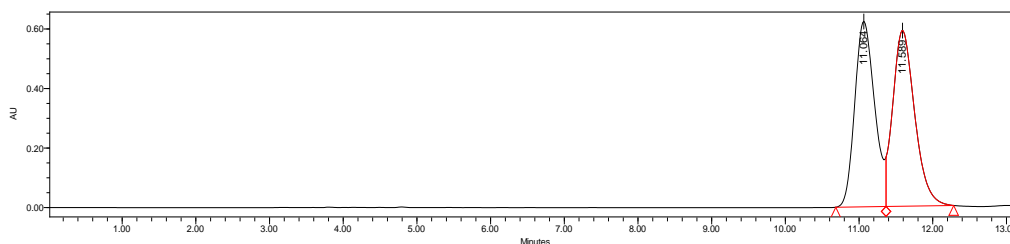

|   | Retention Time | Area     | % Area |
|---|----------------|----------|--------|
| 1 | 11.064         | 11749887 | 49.13  |
| 2 | 11.589         | 12164698 | 50.87  |

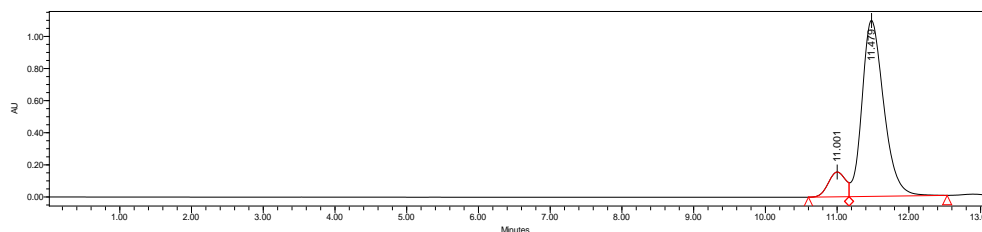

|   | Retention Time | Area     | % Area |
|---|----------------|----------|--------|
| 1 | 11.001         | 2542839  | 9.93   |
| 2 | 11.479         | 23068735 | 90.07  |

**Dimethyl 2-{1-cyclobutyl-2-[1-(naphthalen-2-yl)-1H-tetrazol-5-yl]-2-(naphthalen-2-ylimino)ethyl}malonate (5d)**

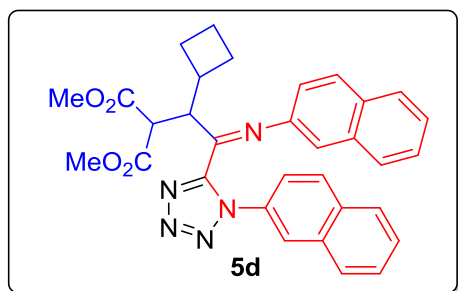

Yellow solid; m.p. 48-52 °C; 91% yield, 83:17 e.r.;  $[\alpha]_D^{21} = -93.12$  ( $c = 0.87$  in  $\text{CH}_2\text{Cl}_2$ ).

**HPLC** DAICEL CHIRALCEL IC, *n*-hexane/2-propanol = 70/30, flow rate = 1.0 mL/min,  $\lambda = 254$  nm,  $t_R$  (minor) = 9.93 min,  $t_R$  (major) = 13.45 min.

**IR** (neat): 2953, 1740, 1508, 1437, 1267, 1157, 1022, 858, 816 and  $746\text{ cm}^{-1}$ .

**$^1\text{H}$  NMR** (400 MHz,  $\text{CDCl}_3$ )  $\delta = 8.11$  (s, 0.5H), 7.93 – 7.81 (m, 1.5H), 7.78 – 7.66 (m, 3H), 7.57 – 7.24 (m, 9.5H), 7.23 – 7.15 (m, 1.5H), 7.04 – 6.91 (m, 2.5H), 6.85 – 6.75 (m, 1H), 6.25 (s, 1H), 6.09 – 6.00 (m, 1H), 4.55 (d,  $J = 10.8$  Hz, 0.5H), 4.20 – 4.13 (m, 1H), 4.08 (d,  $J = 6.6$  Hz, 1H), 3.96 (t,  $J = 10.8$  Hz, 0.5H), 3.87 – 3.63 (m, 9H), 3.27 – 3.09 (m, 1.5H), 2.27 – 2.11 (m, 2H), 2.08 – 1.76 (m, 5H), 1.76 – 1.66 (m, 1H), 1.54 – 1.45 (m, 3H).

**$^{13}\text{C}\{^1\text{H}\}$  NMR** (101 MHz,  $\text{CDCl}_3$ )  $\delta = 169.4, 169.1, 169.0, 156.4, 155.2, 150.9, 149.9, 145.7, 133.8, 133.4, 133.3, 133.2, 133.1, 132.8, 132.6, 131.0, 130.9, 129.1, 128.9, 128.5, 128.4, 128.0, 127.8, 127.6, 127.5, 127.4, 127.2, 126.6, 126.3, 125.5, 125.2, 124.8, 123.3, 122.8, 120.8, 120.1, 119.2, 116.0, 115.2, 53.9, 53.6, 53.4, 53.1, 52.9, 47.5, 38.3, 38.2, 28.6, 28.1, 27.4, 27.3, 27.0, 18.4, 18.2$ .

**HRMS** (ESI-FT) calcd for  $\text{C}_{32}\text{H}_{30}\text{N}_5\text{O}_4^+$  ( $[\text{M}+\text{H}^+]$ ) = 548.2292, Found 548.2299.

Chiral HPLC spectrum **5d**:

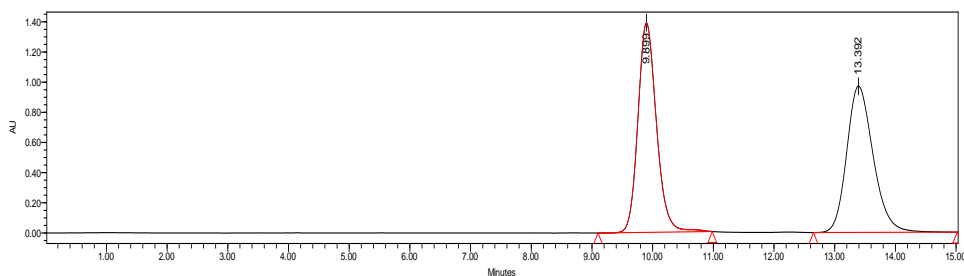

|   | Retention Time | Area     | % Area |
|---|----------------|----------|--------|
| 1 | 9.899          | 29427940 | 50.04  |
| 2 | 13.392         | 29383609 | 49.96  |

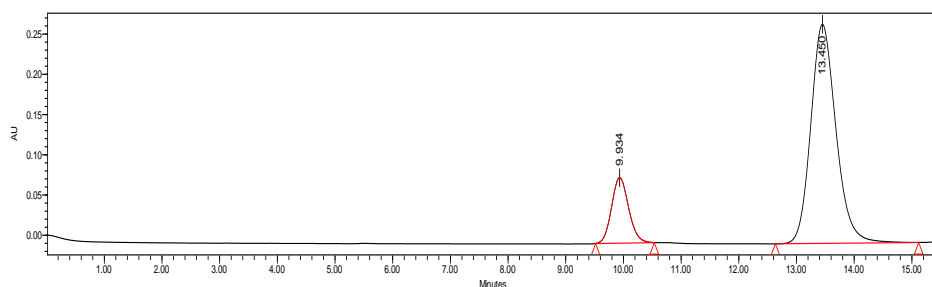

|   | Retention Time | Area    | % Area |
|---|----------------|---------|--------|
| 1 | 9.934          | 1671274 | 16.85  |
| 2 | 13.450         | 8248649 | 83.15  |

**Dimethyl 2-{3,3-dimethyl-1-[1-(naphthalen-2-yl)-1H-tetrazol-5-yl]-1-(naphthalen-2-ylimino)butan-2-yl}malonate (5e)**

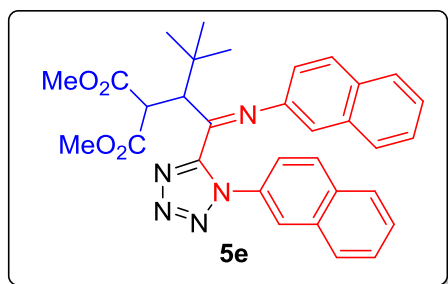

Yellow solid; m.p. 50-54 °C; 92% yield, 87:13 e.r.;  $[\alpha]_D^{21} = -330.56$  ( $c = 0.67$  in  $\text{CH}_2\text{Cl}_2$ ).

**HPLC** DAICEL CHIRALCEL IC, *n*-hexane/2-propanol = 70/30, flow rate = 1.0 mL/min,  $\lambda = 254$  nm,  $t_R$  (minor) = 8.88 min,  $t_R$  (major) = 12.04 min.

**IR** (neat): 2961, 1740, 1506, 1292, 1217, 1157, 858, 816 and 745  $\text{cm}^{-1}$ .

**$^1\text{H}$  NMR** (400 MHz,  $\text{CDCl}_3$ )  $\delta = 8.11$  (s, 0.38H), 8.03 – 7.89 (m, 1.36H), 7.78 – 7.57 (m, 3.73H), 7.57 – 7.19 (m, 9.42H), 7.14 – 7.08 (m, 1H), 7.00 (d,  $J = 8.6$  Hz, 1H),

6.92 – 6.84 (m, 1.33H), 6.40 (s, 1H), 6.20 (dd,  $J = 8.6, 2.0$  Hz, 1H), 4.73 (d,  $J = 10.4$  Hz, 0.36H), 4.33 (d,  $J = 8.0$  Hz, 1H), 4.28 – 4.23 (m, 1.36H), 3.82 (s, 1H), 3.76 – 3.70 (m, 4H), 3.65 (s, 3H), 1.22 (s, 9H), 0.65 (s, 3.35H).

$^{13}\text{C}\{^1\text{H}\}$  NMR (101 MHz,  $\text{CDCl}_3$ )  $\delta = 170.3, 169.9, 169.6, 156.7, 155.8, 152.8, 150.7, 146.1, 145.6, 133.8, 133.6, 133.4, 133.1, 133.0, 132.6, 132.6, 131.4, 131.1, 131.0, 129.0, 128.8, 128.7, 128.6, 128.5, 128.4, 128.1, 127.9, 127.7, 127.6, 127.6, 127.5, 127.4, 127.2, 126.4, 126.3, 125.5, 125.2, 124.5, 123.5, 121.3, 120.5, 119.4, 115.9, 115.5, 56.5, 54.1, 53.4, 53.3, 53.0, 52.9, 52.8, 49.1, 36.1, 35.4, 28.8, 27.0$ .

HRMS (ESI-FT) calcd for  $\text{C}_{32}\text{H}_{32}\text{N}_5\text{O}_4^+$  ( $[\text{M}+\text{H}^+]$ ) = 550.2449, Found 550.2444.

Chiral HPLC spectrum **5e**:

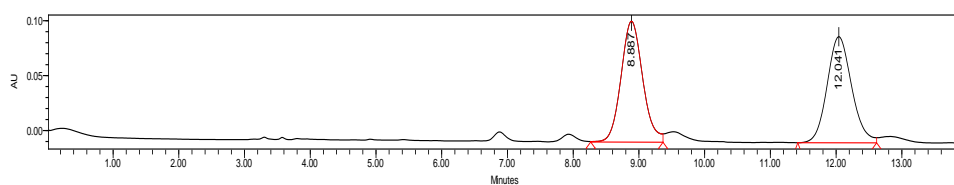

|   | Retention Time | Area    | % Area |
|---|----------------|---------|--------|
| 1 | 8.887          | 2524545 | 50.22  |
| 2 | 12.041         | 2502398 | 49.78  |

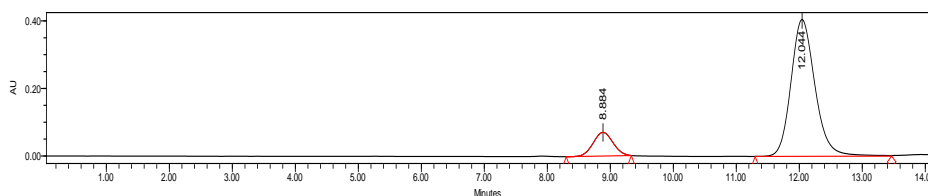

|   | Retention Time | Area     | % Area |
|---|----------------|----------|--------|
| 1 | 8.884          | 1587452  | 12.81  |
| 2 | 12.044         | 10803756 | 87.19  |

Dimethyl 2-{4-methyl-1-[1-(naphthalen-2-yl)-1H-tetrazol-5-yl]-1-(naphthalen-2-ylimino)pentan-2-yl}malonate (**5f**)

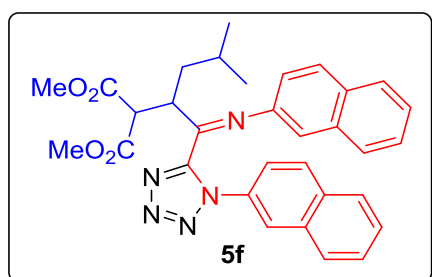

Yellow solid; m.p. 40-42 °C; 99% yield, 87:13 e.r.;  $[\alpha]_D^{21} = -141.5$  ( $c = 0.92$  in  $\text{CH}_2\text{Cl}_2$ ).

**HPLC** DAICEL CHIRALCEL IC, *n*-hexane/2-propanol = 70/30, flow rate = 1.0 mL/min,  $\lambda = 254$  nm,  $t_R$  (minor) = 6.93 min,  $t_R$  (major) = 8.00 min.

**IR** (neat): 3057, 2957, 1738, 1597, 1508, 1437, 1265, 1159, 858, 816, 742 and 476  $\text{cm}^{-1}$ .

**$^1\text{H}$  NMR** (400 MHz,  $\text{CDCl}_3$ )  $\delta = 8.13$  (s, 0.40H), 7.98 – 7.84 (m, 1.40H), 7.81 – 7.68 (m, 3H), 7.62 – 7.21 (m, 10.60H), 7.16 – 7.04 (m, 2.40H), 6.93 (d,  $J = 8.4$  Hz, 0.40H), 6.78 (d,  $J = 8.4$  Hz, 1H), 6.31 (s, 1H), 6.10 (d,  $J = 8.4$  Hz, 1H), 4.64 (d,  $J = 11.0$  Hz, 0.40H), 4.31 (d,  $J = 7.6$  Hz, 1H), 4.20 – 4.12 (m, 1.40H), 3.84 – 3.74 (m, 8.40H), 2.20 – 2.11 (m, 1.40H), 1.99 – 1.88 (m, 1H), 1.85 – 1.73 (m, 1H), 1.33 – 1.29 (m, 0.80H), 1.11 (d,  $J = 6.4$  Hz, 3H), 1.04 (d,  $J = 6.4$  Hz, 1H), 0.75 (d,  $J = 5.6$  Hz, 1.20H), 0.26 (d,  $J = 5.6$  Hz, 1.20H).

**$^{13}\text{C}\{^1\text{H}\}$  NMR** (101 MHz,  $\text{CDCl}_3$ )  $\delta = 169.1, 168.9, 157.3, 157.0, 150.9, 149.6, 145.5, 145.4, 133.7, 133.5, 133.3, 133.2, 132.8, 132.6, 131.0, 130.9, 130.7, 129.2, 128.9, 128.5, 128.4, 128.0, 127.8, 127.7, 127.6, 127.5, 127.4, 127.2, 126.6, 126.4, 125.6, 125.2, 124.8, 123.4, 122.8, 120.8, 119.8, 119.3, 116.3, 115.1, 54.8, 54.6, 53.1, 52.8, 46.5, 41.5, 40.2, 39.6, 27.0, 26.2, 25.3, 23.4, 23.1, 22.7, 21.6$ .

**HRMS** (ESI-FT) calcd for  $\text{C}_{32}\text{H}_{32}\text{N}_5\text{O}_4^+$  ( $[\text{M}+\text{H}^+]$ ) = 550.2449, Found 550.2446.

Chiral HPLC spectrum **5f**:

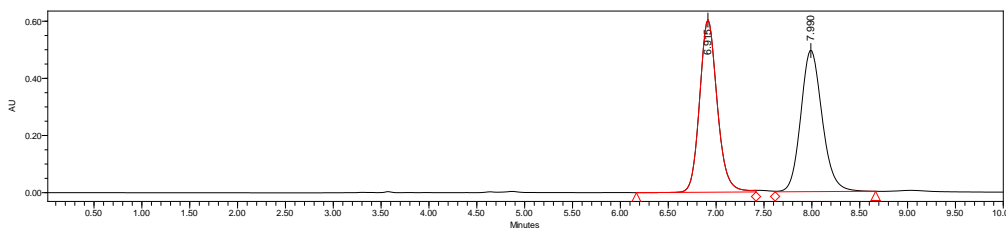

|   | Retention Time | Area    | % Area |
|---|----------------|---------|--------|
| 1 | 6.915          | 7697531 | 50.02  |
| 2 | 7.990          | 7690613 | 49.98  |



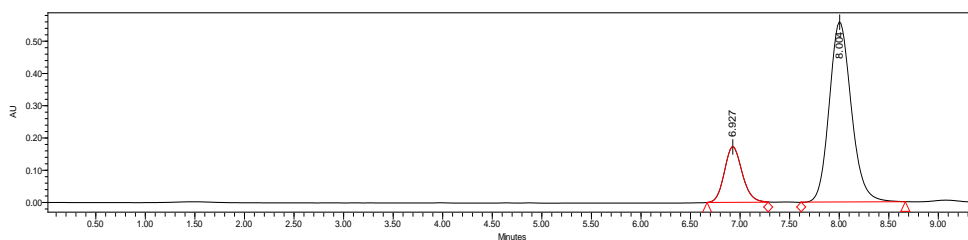

|   | Retention Time | Area    | % Area |
|---|----------------|---------|--------|
| 1 | 6.927          | 2155528 | 20.00  |
| 2 | 8.004          | 8623933 | 80.00  |

**Dimethyl 2-{3-methyl-1-[1-(naphthalen-2-yl)-1H-tetrazol-5-yl]-1-(naphthalen-2-ylimino)butan-2-yl}malonate (5g)**

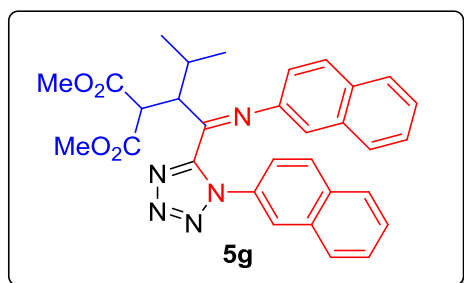

Yellow solid; m.p. 88-90 °C; 93% yield, 93:7 e.r.;  $[\alpha]_D^{21} = -132.8$  ( $c = 0.81$  in  $\text{CH}_2\text{Cl}_2$ ).

**HPLC** DAICEL CHIRALCEL IC, *n*-hexane/2-propanol = 70/30, flow rate = 1.0 mL/min,  $\lambda = 254$  nm,  $t_R$  (minor) = 9.79 min,  $t_R$  (major) = 12.44 min.

**IR** (neat): 2963, 1740, 1263, 1155, 1026, 858, 814, 750 and 474  $\text{cm}^{-1}$ .

**$^1\text{H}$  NMR** (400 MHz,  $\text{CDCl}_3$ )  $\delta = 7.72 - 7.68$  (m, 1H), 7.56 - 7.53 (m, 4H), 7.38 - 7.27 (m, 3H), 7.25 - 7.18 (m, 1H), 7.03 (dd,  $J = 18.8, 8.0$  Hz, 2H), 6.84 - 6.57 (m, 1H), 6.27 (s, 1H), 6.18 - 5.90 (m, 1H), 4.32 (d,  $J = 8.8$  Hz, 1H), 4.11 (dd,  $J = 8.8, 4.8$  Hz, 1H), 3.79 (s, 3H), 3.73 (s, 3H), 2.80 - 2.51 (m, 1H), 1.23 (dd,  $J = 16.4, 6.8$  Hz, 6H).

**$^{13}\text{C}\{^1\text{H}\}$  NMR** (101 MHz,  $\text{CDCl}_3$ )  $\delta = 169.7, 169.3, 156.7, 150.1, 145.6, 133.3, 133.2, 132.6, 131.0, 130.9, 129.1, 128.5, 128.4, 127.7, 127.6, 127.4, 127.2, 126.4, 125.6, 123.1, 121.0, 119.2, 115.9, 53.7, 53.0, 52.8, 52.5, 29.9, 27.0, 20.8, 18.8$ .

**HRMS** (ESI-FT) calcd for  $\text{C}_{31}\text{H}_{30}\text{N}_5\text{O}_4^+$  ( $[\text{M}+\text{H}^+]$ ) = 536.2292, Found 536.2289.

### Chiral HPLC spectrum **5g**:

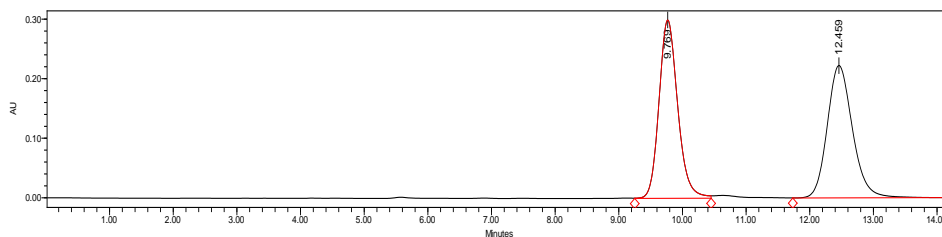

|   | Retention Time | Area    | % Area |
|---|----------------|---------|--------|
| 1 | 9.769          | 6106548 | 49.95  |
| 2 | 12.459         | 6118094 | 50.05  |

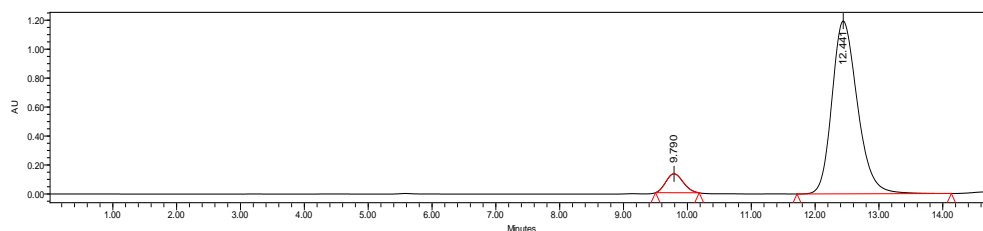

|   | Retention Time | Area     | % Area |
|---|----------------|----------|--------|
| 1 | 9.790          | 2452059  | 6.92   |
| 2 | 12.441         | 33004979 | 93.08  |

### Dibenzyl 2-{1-[1-(2,3-dihydrobenzo[b][1,4]dioxin-6-yl)-1H-tetrazol-5-yl]-1-[(2,3-dihydrobenzo[b][1,4]dioxin-6-yl)imino]-3-methylbutan-2-yl}malonate (**5h**)

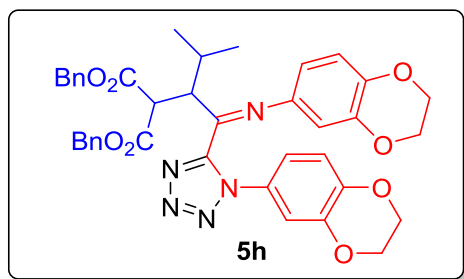

Yellow solid; m.p. 42-44 °C; 92% yield, 91:9 e.r.;  $[\alpha]_D^{21} = -110.1$  ( $c = 0.76$  in CH<sub>2</sub>Cl<sub>2</sub>).

**HPLC** DAICEL CHIRALCEL IA, *n*-hexane/2-propanol = 70/30, flow rate = 1.0 mL/min,  $\lambda = 254$  nm,  $t_R$  (minor) = 12.03 min,  $t_R$  (major) = 18.20 min.

**IR** (neat): 2970, 1734, 1587, 1504, 1460, 1377, 1306, 1064, 895, 812, 743 and 698 cm<sup>-1</sup>.

**<sup>1</sup>H NMR** (400 MHz, CDCl<sub>3</sub>)  $\delta = 7.34 - 7.22$  (m, 10H), 6.71 - 6.65 (m, 1H), 6.59 - 6.47 (m, 2H), 6.39 (d,  $J = 8.4$  Hz, 1H), 5.76 - 5.63 (m, 1H), 5.56 - 5.43 (m, 1H), 5.19

– 5.00 (m, 4H), 4.37 – 4.10 (m, 9H), 4.03 – 3.92 (m, 1H), 2.53 – 2.35 (m, 1H), 1.06 (dd,  $J = 20.4, 7.0$  Hz, 6H).

$^{13}\text{C}\{^1\text{H}\}$  NMR (101 MHz,  $\text{CDCl}_3$ )  $\delta = 168.8, 168.3, 155.3, 149.8, 145.0, 143.6, 142.1, 141.6, 135.5, 135.1, 128.7, 128.5, 128.5, 128.3, 128.2, 128.0, 127.0, 117.7, 117.2, 117.0, 113.5, 112.6, 109.3, 67.6, 67.5, 67.3, 64.4, 64.3, 64.2, 53.2, 53.0, 29.8, 20.3, 18.8$ .

HRMS (ESI-FT) calcd for  $\text{C}_{39}\text{H}_{38}\text{N}_5\text{O}_8^+$  ( $[\text{M}+\text{H}^+]$ ) = 704.2715, Found 704.2711.

Chiral HPLC spectrum **5h**:

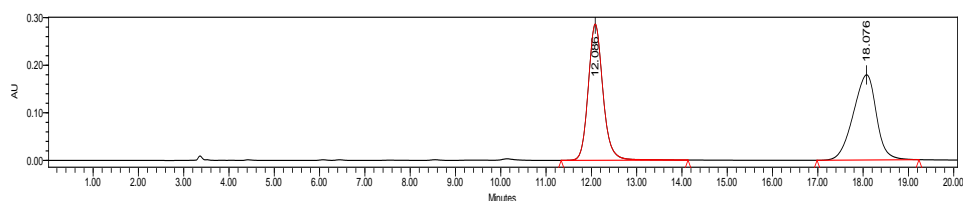

|   | Retention Time | Area    | % Area |
|---|----------------|---------|--------|
| 1 | 12.086         | 6428700 | 50.31  |
| 2 | 18.076         | 6349209 | 49.69  |

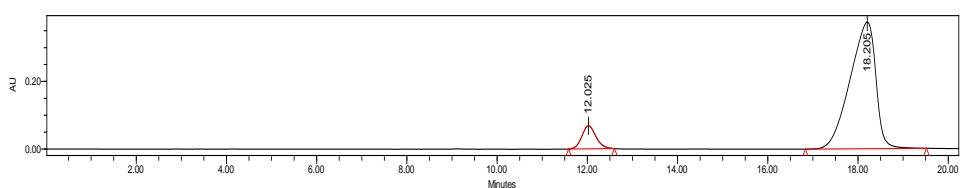

|   | Retention Time | Area     | % Area |
|---|----------------|----------|--------|
| 1 | 12.025         | 1485645  | 9.07   |
| 2 | 18.205         | 14900452 | 90.93  |

Dimethyl 2-{1-cyclohexyl-2-[1-(2,3-dihydrobenzo[b][1,4]dioxin-6-yl)-1H-tetrazol-5-yl]-2-[(2,3-dihydrobenzo[b][1,4]dioxin-6-yl)imino]ethyl}malonate (**5i**)

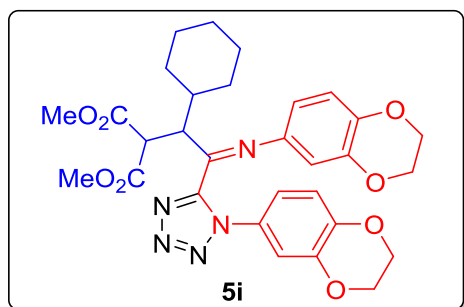

Yellow solid; m.p. 58-62 °C; 93% yield, 90.5:9.5 e.r.;  $[\alpha]_D^{21} = -103.7$  ( $c = 0.50$  in

CH<sub>2</sub>Cl<sub>2</sub>).

**HPLC** DAICEL CHIRALCEL IC, *n*-hexane/2-propanol = 70/30, flow rate = 1.0

mL/min,  $\lambda = 254$  nm,  $t_R$  (minor) = 21.55 min,  $t_R$  (major) = 25.52 min.

**IR** (neat): 2932, 1738, 1587, 1505, 1306, 1064, 893, 812 and 737 cm<sup>-1</sup>.

**<sup>1</sup>H NMR** (400 MHz, CDCl<sub>3</sub>)  $\delta = 6.76 - 6.68$  (m, 1H), 6.61 - 6.45 (m, 2H), 6.41 (d,  $J = 8.6$  Hz, 1H), 5.72 (s, 1H), 5.58 (d,  $J = 8.6$  Hz, 1H), 4.31 - 4.23 (m, 5H), 4.15 (d,  $J = 6.2$  Hz, 4H), 3.94 (dd,  $J = 8.8, 3.8$  Hz, 1H), 3.74 (s, 3H), 3.70 (s, 3H), 2.01 (s, 1H), 1.93 - 1.74 (m, 4H), 1.35 - 1.06 (m, 6H).

**<sup>13</sup>C{<sup>1</sup>H} NMR** (101 MHz, CDCl<sub>3</sub>)  $\delta = 169.6, 169.1, 155.5, 149.9, 145.1, 143.7, 143.6, 142.2, 141.6, 127.1, 117.8, 117.2, 117.1, 113.5, 112.5, 109.3, 64.5, 64.4, 64.3, 53.2, 52.8, 52.5, 40.1, 31.0, 29.3, 27.0, 26.8, 26.4$ .

**HRMS** (ESI-FT) calcd for C<sub>30</sub>H<sub>34</sub>N<sub>5</sub>O<sub>8</sub><sup>+</sup> ([M+H<sup>+</sup>]) = 592.2402, Found 592.2396.

Chiral HPLC spectrum **5i**:

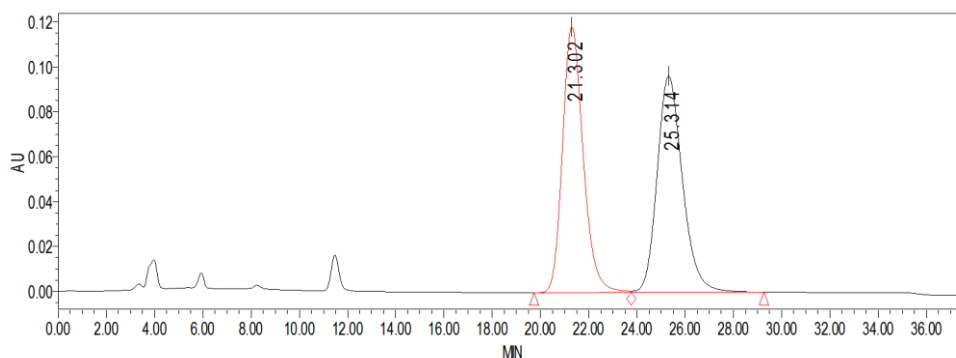

|   | Retention Time | Area    | % Area |
|---|----------------|---------|--------|
| 1 | 21.302         | 7049224 | 50.12  |
| 2 | 25.314         | 7016275 | 49.88  |

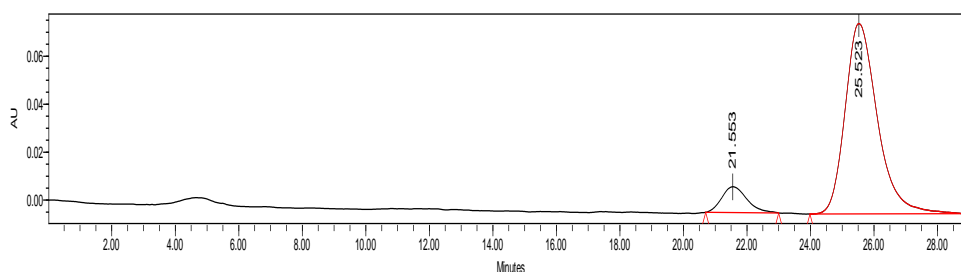

|   | Retention Time | Area    | % Area |
|---|----------------|---------|--------|
| 1 | 21.553         | 593020  | 9.55   |
| 2 | 25.523         | 5615897 | 90.45  |

**Diethyl 2-[1-cyclohexyl-2-[1-(2,3-dihydrobenzo[b][1,4]dioxin-6-yl)-1H-tetrazol-5-yl]-2-[(2,3-dihydrobenzo[b][1,4]dioxin-6-yl)imino]ethyl}malonate (5j)**

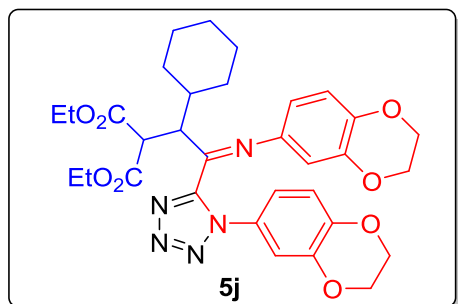

Yellow solid; m.p. 50-52 °C; 91% yield, 93:7 e.r.;  $[\alpha]_D^{21} = -119.7$  ( $c = 0.89$  in  $\text{CH}_2\text{Cl}_2$ ).

**HPLC** DAICEL CHIRALCEL IA, *n*-hexane/2-propanol = 70/30, flow rate = 1.0 mL/min,  $\lambda = 254$  nm,  $t_R$  (minor) = 6.97 min,  $t_R$  (major) = 7.39 min.

**IR** (neat): 2932, 1732, 1587, 1504, 1373, 1306, 1065, 891, 864, 810, 739 and 615  $\text{cm}^{-1}$ .

**$^1\text{H}$  NMR** (400 MHz,  $\text{CDCl}_3$ )  $\delta = 6.72$  (d,  $J = 8.4$  Hz, 1H), 6.66 – 6.45 (m, 2H), 6.44 – 6.40 (m, 1H), 5.90 – 5.68 (m, 1H), 5.67 – 5.42 (m, 1H), 4.32 – 4.12 (m, 13H), 3.95 (dd,  $J = 9.2, 4.0$  Hz, 1H), 2.06 – 1.75 (m, 5H), 1.71 – 1.64 (m, 1H), 1.60 – 1.45 (m, 1H), 1.31 – 1.16 (m, 10H).

**$^{13}\text{C}\{^1\text{H}\}$  NMR** (101 MHz,  $\text{CDCl}_3$ )  $\delta = 169.3, 168.7, 155.6, 150.0, 145.0, 143.6, 142.3, 141.5, 127.2, 117.7, 117.1, 117.0, 113.5, 112.5, 109.3, 64.5, 64.3, 64.2, 61.8, 61.6, 53.0, 52.9, 40.2, 30.9, 29.5, 27.0, 26.9, 26.4, 14.2, 14.1$ .

**HRMS** (ESI-FT) calcd for  $\text{C}_{32}\text{H}_{38}\text{N}_5\text{O}_8^+$  ( $[\text{M}+\text{H}^+]$ ) = 620.2715, Found 620.2713.

Chiral HPLC spectrum **5j**:

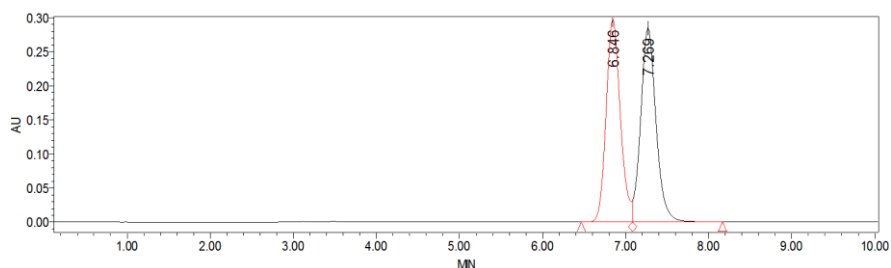

|   | Retention Time | Area    | % Area |
|---|----------------|---------|--------|
| 1 | 6.846          | 3531594 | 49.30  |
| 2 | 7.269          | 3631243 | 50.70  |

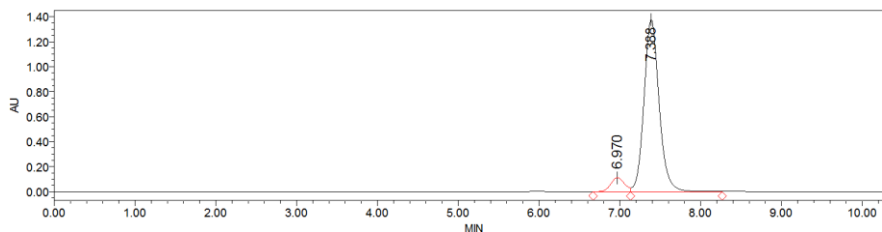

|   | Retention Time | Area     | % Area |
|---|----------------|----------|--------|
| 1 | 6.970          | 1320513  | 6.86   |
| 2 | 7.388          | 17930363 | 93.14  |

**Diisopropyl 2-{1-cyclohexyl-2-[1-(2,3-dihydrobenzo[b][1,4]dioxin-6-yl)-1H-tetrazol-5-yl]}-2-[(2,3-dihydrobenzo[b][1,4]dioxin-6-yl)imino]ethyl}malonate (5k)**

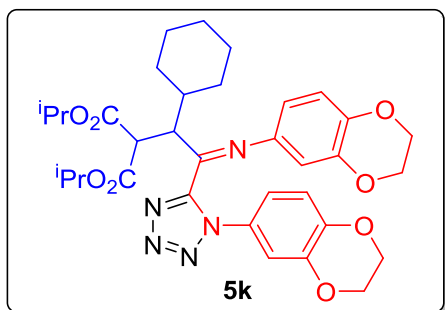

Yellow solid; m.p. 52-54 °C; 88% yield, 87.5:12.5 e.r.;  $[\alpha]_D^{21} = -140.3$  ( $c = 0.80$  in  $\text{CH}_2\text{Cl}_2$ ).

**HPLC** DAICEL CHIRALCEL IA, *n*-hexane/2-propanol = 70/30, flow rate = 1.0 mL/min,  $\lambda = 254$  nm,  $t_R$  (minor) = 5.95 min,  $t_R$  (major) = 6.34 min.

**IR** (neat): 2982, 2932, 1728, 1587, 1504, 1458, 1306, 1103, 1065, 895, 812 and 739  $\text{cm}^{-1}$ .

**$^1\text{H}$  NMR** (400 MHz,  $\text{CDCl}_3$ )  $\delta = 6.83 - 6.66$  (m, 1H), 6.59 – 6.50 (m, 2H), 6.49 – 6.32 (m, 1H), 5.76 – 5.66 (m, 1H), 5.63 – 5.49 (m, 1H), 5.22 – 4.75 (m, 2H), 4.40 – 4.01 (m, 8H), 3.93 (dd,  $J = 10.0, 4.0$  Hz, 1H), 2.06 – 1.73 (m, 7H), 1.32 – 1.05 (m, 15H).

**$^{13}\text{C}\{^1\text{H}\}$  NMR** (101 MHz,  $\text{CDCl}_3$ )  $\delta = 168.7, 168.4, 155.6, 150.0, 145.0, 143.6, 142.3, 141.5, 127.2, 119.5, 117.7, 117.1, 117.0, 113.6, 112.9, 112.6, 109.3, 109.0, 69.2, 64.5, 64.3, 64.2, 53.6, 52.6, 40.4, 30.8, 29.5, 27.1, 27.0, 26.4, 21.8, 21.7, 21.6, 21.5$ .

**HRMS** (ESI-FT) calcd for  $\text{C}_{34}\text{H}_{42}\text{N}_5\text{O}_8^+$  ( $[\text{M}+\text{H}^+]$ ) = 648.3028, Found 648.3033.

### Chiral HPLC spectrum 5k:

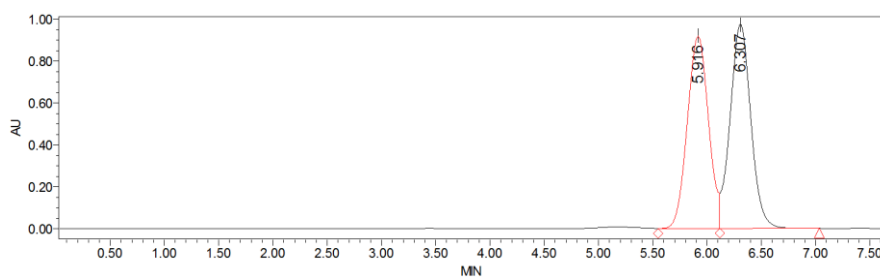

|   | Retention Time | Area     | % Area |
|---|----------------|----------|--------|
| 1 | 5.916          | 12385768 | 49.14  |
| 2 | 6.307          | 12819936 | 50.86  |

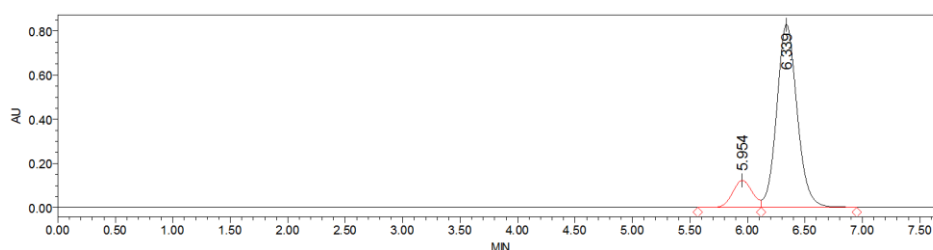

|   | Retention Time | Area     | % Area |
|---|----------------|----------|--------|
| 1 | 5.954          | 1459786  | 12.48  |
| 2 | 6.339          | 10241701 | 87.52  |

### Dibenzyl 2-[1-cyclohexyl-2-[1-(2,3-dihydrobenzo[b][1,4]dioxin-6-yl)-1H-tetrazol-5-yl]-2-[(2,3-dihydrobenzo[b][1,4]dioxin-6-yl)imino]ethyl]malonate (5l)

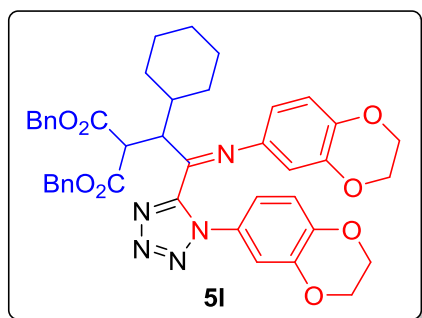

Yellow solid; m.p. 48-52 °C; 92% yield, 95.5:4.5 e.r.;  $[\alpha]_D^{21} = -149.5$  ( $c = 0.94$  in  $\text{CH}_2\text{Cl}_2$ ).

**HPLC** DAICEL CHIRALCEL IC, *n*-hexane/2-propanol = 70/30, flow rate = 1.0 mL/min,  $\lambda = 254$  nm,  $t_R$  (minor) = 20.56 min,  $t_R$  (major) = 22.74 min.

**IR** (neat): 2928, 1732, 1503, 1375, 1063, 893, 810, 746 and 696  $\text{cm}^{-1}$ .

**$^1\text{H}$  NMR** (400 MHz,  $\text{CDCl}_3$ )  $\delta = 7.32$  (s, 5H), 7.24 (s, 5H), 6.71 – 6.62 (m, 1H), 6.60

– 6.43 (m, 2H), 6.41 – 6.32 (m, 1H), 5.70 (s, 1H), 5.52 (d,  $J = 8.4$  Hz, 1H), 5.23 – 5.10 (m, 3H), 5.06 (d,  $J = 13.2$  Hz, 1H), 4.34 (d,  $J = 9.2$  Hz, 1H), 4.30 – 4.12 (m, 8H), 4.02 – 3.94 (m, 1H), 1.92 (s, 1H), 1.83 – 1.56 (m, 5H), 1.27 – 1.02 (m, 5H).

$^{13}\text{C}\{^1\text{H}\}$  NMR (101 MHz,  $\text{CDCl}_3$ )  $\delta = 168.8, 168.4, 155.3, 149.9, 145.0, 143.6, 142.2, 141.5, 135.5, 135.1, 128.7, 128.6, 128.5, 128.4, 128.3, 128.2, 128.0, 127.0, 117.7, 117.2, 117.0, 113.5, 112.6, 109.3, 67.5, 67.2, 64.4, 64.3, 64.2, 53.0, 40.1, 30.7, 29.5, 26.9, 26.7, 26.2.$

HRMS (ESI-FT) calcd for  $\text{C}_{42}\text{H}_{42}\text{N}_5\text{O}_8^+$  ( $[\text{M}+\text{H}^+]$ ) = 744.3028, Found 744.3020.

Chiral HPLC spectrum **5l**:

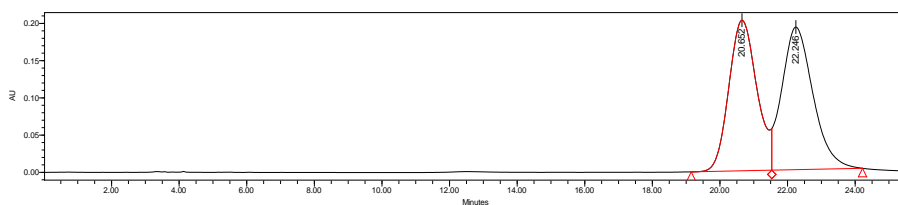

|   | Retention Time | Area     | % Area |
|---|----------------|----------|--------|
| 1 | 20.652         | 11671290 | 48.83  |
| 2 | 22.246         | 12228496 | 51.17  |

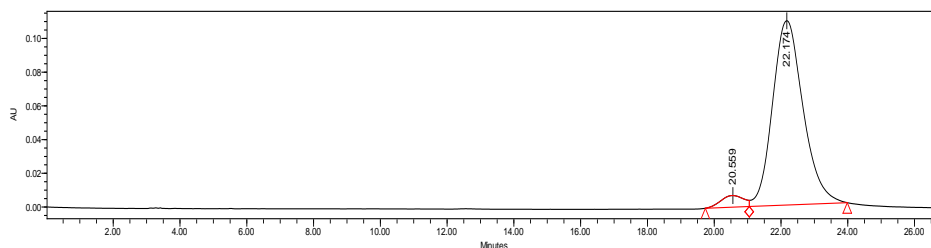

|   | Retention Time | Area    | % Area |
|---|----------------|---------|--------|
| 1 | 20.559         | 329808  | 4.53   |
| 2 | 22.174         | 6955873 | 95.47  |

Dibenzyl 2-{1-cyclohexyl-2-[1-(naphthalen-2-yl)-1H-tetrazol-5-yl]-2-(naphthalen-2-ylimino)ethyl}malonate (**5m**)

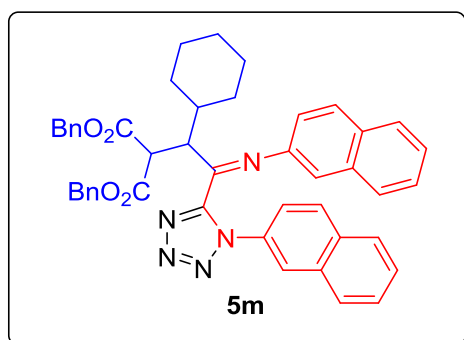



Yellow solid; m.p. 46-50 °C; 88% yield, 92:8 e.r.;  $[\alpha]_D^{21} = -173.9$  ( $c = 0.84$  in  $\text{CH}_2\text{Cl}_2$ ).

**HPLC** DAICEL CHIRALCEL IA,  $n$ -hexane/2-propanol = 70/30, flow rate = 1.0 mL/min,  $\lambda = 254$  nm,  $t_R$  (minor) = 6.90 min,  $t_R$  (major) = 9.60 min.

**IR** (neat): 2930, 2855, 1734, 1504, 1452, 1267, 1022, 856, 814, 745, 698 and 476  $\text{cm}^{-1}$ .

**$^1\text{H}$  NMR** (400 MHz,  $\text{CDCl}_3$ )  $\delta = 7.98$  (s, 0.1H), 7.93 – 7.82 (m, 1H), 7.71 – 7.67 (m, 1.1H), 7.56 – 7.112 (m, 19.1H), 7.00 (dd,  $J = 22.4, 8.4$  Hz, 2H), 6.87 (d,  $J = 8.0$  Hz, 0.1H), 6.73 (d,  $J = 8.8$  Hz, 1H), 6.21 (s, 1H), 5.99 (d,  $J = 8.8$  Hz, 1H), 5.33 – 4.98 (m, 4.4H), 4.78 (d,  $J = 9.6$  Hz, 0.1H), 4.44 (d,  $J = 9.2$  Hz, 1H), 4.22 – 4.08 (m, 1H), 3.97 – 3.94 (m, 0.1H), 2.17 – 2.04 (m, 1.1H), 1.98 – 1.96 (m, 2.2H), 1.84 – 1.72 (m, 2.2H), 1.70 – 1.6 (m, 1.1H), 1.37 – 1.13 (m, 5.5H).

**$^{13}\text{C}\{^1\text{H}\}$  NMR** (101 MHz,  $\text{CDCl}_3$ )  $\delta = 169.0, 168.5, 156.6, 150.1, 145.7, 135.4, 135.1, 133.3, 133.1, 132.6, 131.0, 130.9, 129.1, 128.8, 128.7, 128.5, 128.4, 128.3, 128.1, 127.6, 127.5, 127.4, 127.2, 126.3, 125.5, 123.0, 121.0, 119.4, 116.0, 67.6, 67.4, 53.2, 52.9, 40.1, 31.1, 29.5, 27.0, 26.8, 26.3$ .

**HRMS** (ESI-FT) calcd for  $\text{C}_{46}\text{H}_{42}\text{N}_5\text{O}_4^+$  ( $[\text{M}+\text{H}^+]$ ) = 728.3231, Found 728.3233.

Chiral HPLC spectrum **5m**:

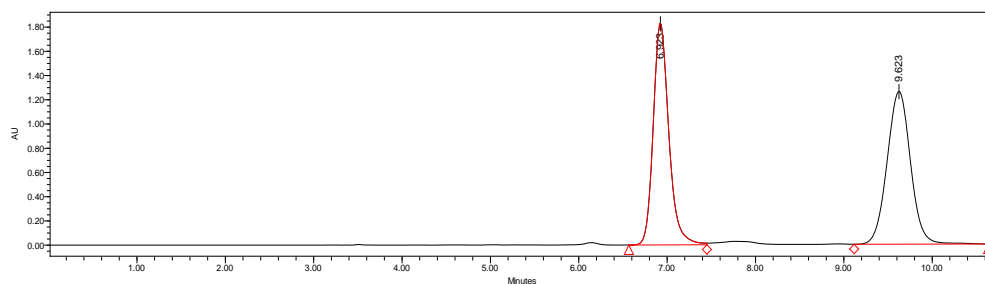

|   | Retention Time | Area     | % Area |
|---|----------------|----------|--------|
| 1 | 6.923          | 22450730 | 49.12  |
| 2 | 9.623          | 23252280 | 50.88  |

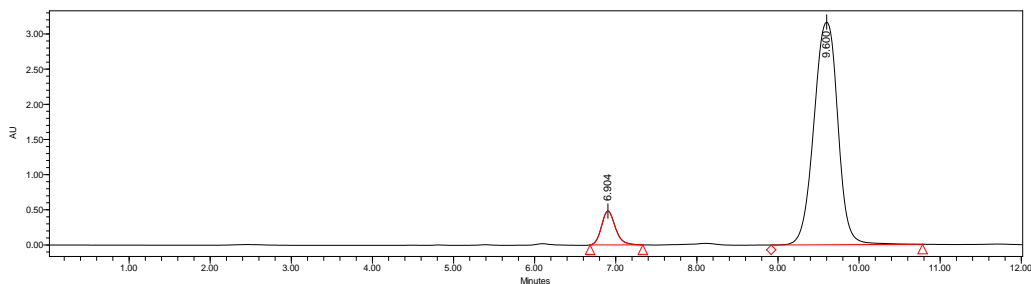

|   | Retention Time | Area     | % Area |
|---|----------------|----------|--------|
| 1 | 6.904          | 5697486  | 8.08   |
| 2 | 9.600          | 64793579 | 91.92  |

**Dibenzyl 2-{1-cyclohexyl-2-[1-(4-methoxyphenyl)-1H-tetrazol-5-yl]-2-[(4-methoxyphenyl)imino]ethyl}malonate (5n)**

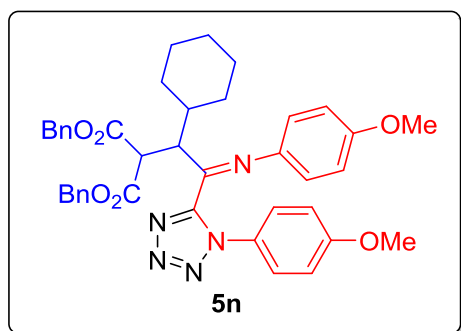

Yellow solid; m.p. 46-50 °C; 80% yield, 92.5:7.5 e.r.;  $[\alpha]_D^{21} = -220.9$  ( $c = 0.62$  in  $\text{CH}_2\text{Cl}_2$ ).

**HPLC** DAICEL CHIRALCEL IA, *n*-hexane/2-propanol = 70/30, flow rate = 1.0 mL/min,  $\lambda = 254$  nm,  $t_R$  (minor) = 7.05 min,  $t_R$  (major) = 12.46 min.

**IR** (neat): 2928, 1738, 1605, 1508, 1452, 1252, 1028, 833, 746 and 698  $\text{cm}^{-1}$ .

**$^1\text{H}$  NMR** (400 MHz,  $\text{CDCl}_3$ )  $\delta = 7.36 - 7.20$  (m, 13.3H), 6.96 – 6.86 (m, 2.9H), 6.81 – 6.74 (m, 1.3H), 6.72 – 6.65 (m, 2H), 6.43 (d,  $J = 8.8$  Hz, 2H), 5.99 (d,  $J = 8.8$  Hz, 2H), 5.25 – 4.93 (m, 5.2H), 4.73 (d,  $J = 10.2$  Hz, 0.3H), 4.34 (d,  $J = 9.4$  Hz, 1H), 4.01 – 3.87 (m, 1.3H), 3.85 – 3.60 (m, 7.8H), 2.05 – 1.89 (m, 1.3H), 1.80 – 1.68 (m, 3.9H), 1.63 – 1.45 (m, 2.6H), 1.26 – 0.96 (m, 6.5H).

**$^{13}\text{C}\{^1\text{H}\}$  NMR** (101 MHz,  $\text{CDCl}_3$ )  $\delta = 168.9, 168.8, 168.6, 168.4, 160.7, 160.5, 157.4, 156.9, 155.5, 155.3, 151.7, 149.9, 141.6, 135.5, 135.2, 135.1, 128.7, 128.6, 128.5, 128.4, 128.3, 128.2, 128.0, 127.8, 126.7, 125.5, 121.1, 120.9, 114.2, 114.1, 113.9,$

67.6, 67.5, 67.2, 55.8, 55.7, 53.9, 53.0, 52.8, 45.9, 41.1, 39.9, 31.2, 30.9, 30.6, 29.4, 26.9, 26.7, 26.3, 26.2, 25.9.

**HRMS** (ESI-FT) calcd for  $C_{40}H_{42}N_5O_6^+$  ( $[M+H]^+$ ) = 688.3130, Found 688.3132.

Chiral HPLC spectrum **5n**:

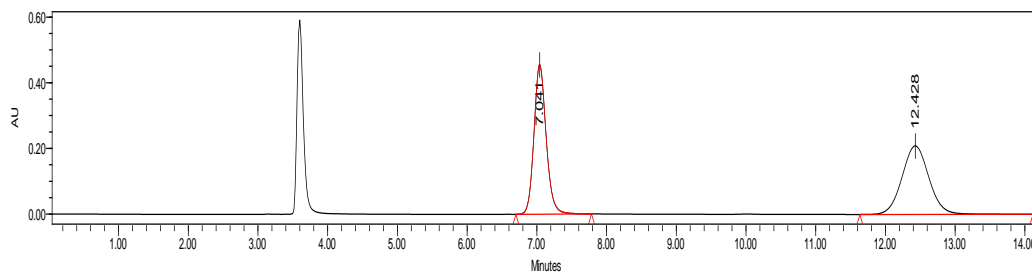

|   | Retention Time | Area    | % Area |
|---|----------------|---------|--------|
| 1 | 7.041          | 5527798 | 49.69  |
| 2 | 12.428         | 5596898 | 50.31  |

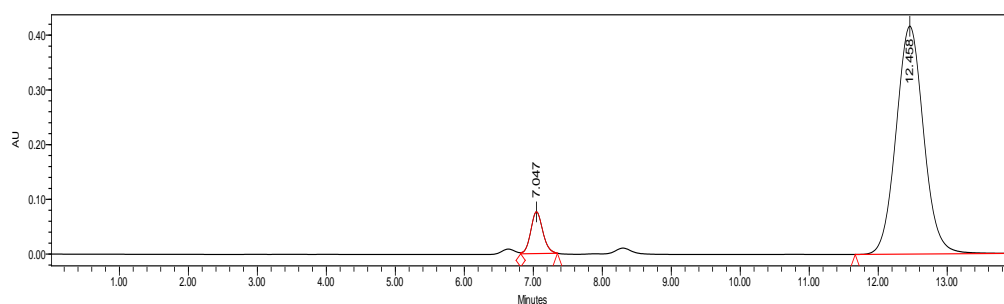

|   | Retention Time | Area     | % Area |
|---|----------------|----------|--------|
| 1 | 7.047          | 926386   | 7.46   |
| 2 | 12.458         | 11494782 | 92.54  |

**Methyl 4,4-dimethyl-3-[[1-(naphthalen-2-yl)-1H-tetrazol-5-yl](naphthalen-2-ylimino)**

**Methyl}pentanoate (6e)**

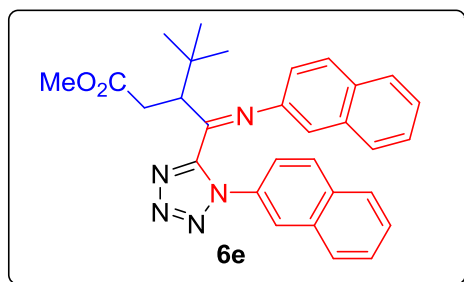

Yellow oil; 70% yield, 85:15 e.r.;  $[\alpha]_D^{21} = -106.2$  ( $c = 0.26$  in  $CH_2Cl_2$ ).

**UPC<sup>2</sup> Phenomenex CHIRALCEL IC-3**,  $CO_2/CH_3OH = 90/10$ , flow rate = 1.5

mL/min,  $\lambda = 254$  nm,  $t_R$  (minor) = 11.99 min,  $t_R$  (major) = 12.23 min.

**IR** (neat): 2961, 1732, 1628, 1207, 1107, 856, 814, 746 and 474  $\text{cm}^{-1}$ .

**$^1\text{H}$  NMR** (400 MHz,  $\text{CDCl}_3$ )  $\delta = 7.77 - 7.68$  (m, 1H), 7.56 - 7.28 (m, 6H), 7.24 - 7.18 (m, 1H), 7.14 - 7.05 (m, 2H), 7.01 (d,  $J = 8.6$  Hz, 1H), 6.82 (d,  $J = 8.4$  Hz, 1H), 6.37 (s, 1H), 6.17 (d,  $J = 8.4$  Hz, 1H), 3.84 (d,  $J = 10.4$  Hz, 1H), 3.68 (s, 3H), 3.31 - 3.18 (m, 1H), 2.87 (d,  $J = 17.2$  Hz, 1H), 1.22 (s, 9H).

**$^{13}\text{C}\{^1\text{H}\}$  NMR** (101 MHz,  $\text{CDCl}_3$ )  $\delta = 173.9, 146.0, 133.4, 132.6, 130.9, 129.1, 128.5, 128.2, 127.7, 127.6, 127.4, 127.2, 126.3, 125.4, 123.1, 121.0, 119.5, 116.0, 53.8, 52.0, 35.5, 35.4, 28.6$ .

**HRMS** (ESI-FT) calcd for  $\text{C}_{30}\text{H}_{30}\text{N}_5\text{O}_2^+$  ( $[\text{M}+\text{H}^+]$ ) = 492.2394, Found 492.2392.

Chiral HPLC spectrum **6e**:

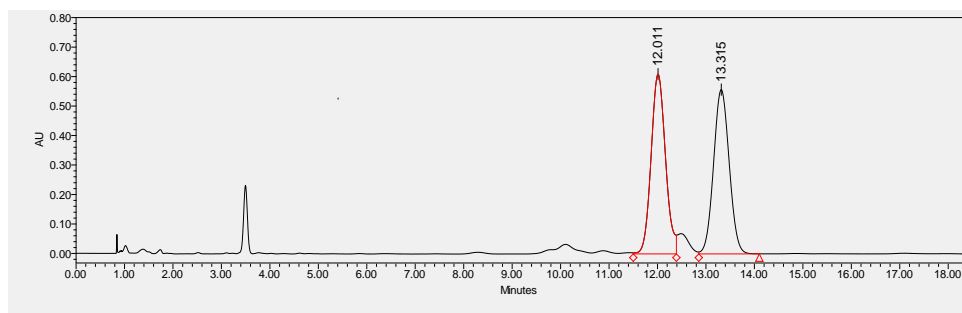

|   | Retention Time | % Area |
|---|----------------|--------|
| 1 | 12.011         | 50.12  |
| 2 | 13.315         | 49.88  |

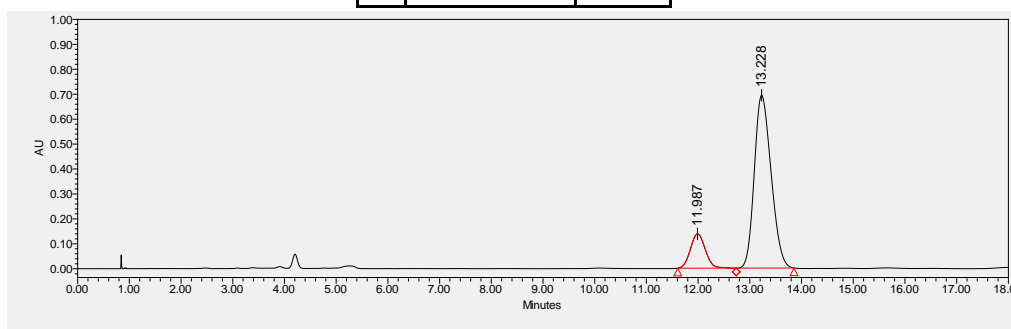

|   | Retention Time | % Area |
|---|----------------|--------|
| 1 | 11.987         | 14.97  |
| 2 | 13.228         | 85.03  |

**Dimethyl 2-{2-[1-(naphthalen-2-yl)-1H-tetrazol-5-yl]-2-(naphthalen-2-ylimino)-1-phenylethyl}malonate (5o)**

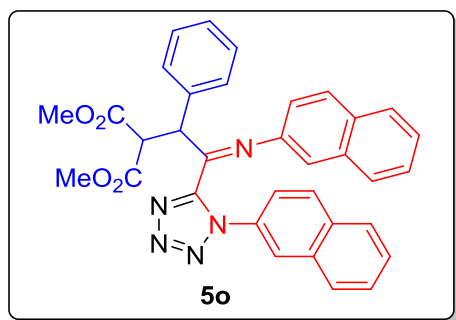

Yellow solid; m.p. 50-52 °C; 99% yield, 94.5:5.5 e.r.;  $[\alpha]_D^{26} = -272.2$  ( $c = 0.90$  in  $\text{CH}_2\text{Cl}_2$ ).

**HPLC** DAICEL CHIRALCEL IA, *n*-hexane/2-propanol = 70/30, flow rate = 1.0 mL/min,  $\lambda = 330$  nm,  $t_R$  (minor) = 6.39 min,  $t_R$  (major) = 11.26 min.

**IR** (neat): 1744, 1502, 1437, 1302, 1265, 1149, 1030, 860, 816, 750 and 702  $\text{cm}^{-1}$ .

**$^1\text{H}$  NMR** (400 MHz,  $\text{CDCl}_3$ )  $\delta = 7.89 - 6.92$  (m, 15H), 6.48 - 6.19 (m, 2H), 6.16 - 6.01 (m, 1H), 6.00 - 5.76 (m, 1H), 5.41 (d,  $J = 12.0$  Hz, 1H), 4.85 (d,  $J = 12.4$  Hz, 1H), 3.78 (s, 3H), 3.53 (s, 3H).

**$^{13}\text{C}\{^1\text{H}\}$  NMR** (101 MHz,  $\text{CDCl}_3$ )  $\delta = 168.2, 167.9, 167.2, 155.9, 155.8, 149.6, 145.1, 134.7, 133.8, 133.3, 133.1, 132.8, 132.3, 131.1, 130.7, 130.2, 129.5, 129.1, 128.9, 128.7, 128.7, 128.6, 128.5, 128.1, 127.7, 127.6, 127.5, 127.4, 127.2, 126.5, 125.7, 125.2, 122.8, 122.6, 120.7, 119.3, 116.6, 57.0, 55.2, 54.36, 53.1, 52.7, 40.8$ .

**HRMS** (ESI-FT) calcd for  $\text{C}_{34}\text{H}_{28}\text{N}_5\text{O}_4^+$  ( $[\text{M}+\text{H}^+]$ ) = 570.2136, Found 570.2133.

Chiral HPLC spectrum **5o**:

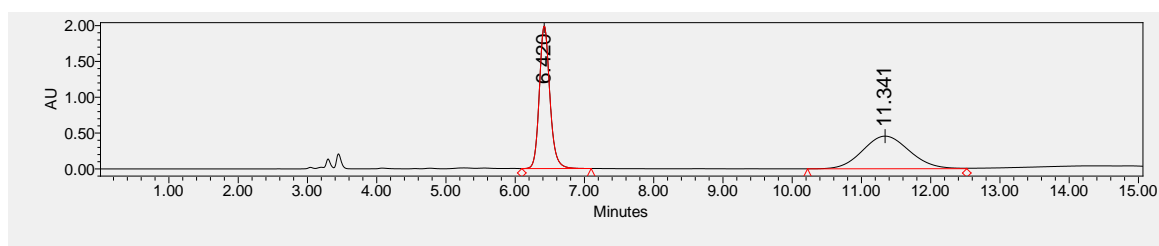

|   | Retention Time | Area     | % Area |
|---|----------------|----------|--------|
| 1 | 6.420          | 21082548 | 49.59  |
| 2 | 11.341         | 21430829 | 50.41  |

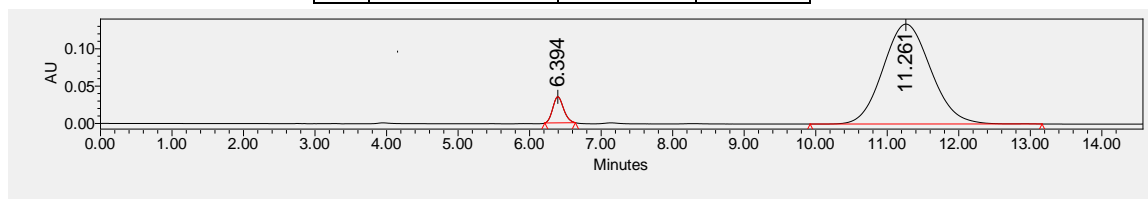

|   | Retention Time | Area    | % Area |
|---|----------------|---------|--------|
| 1 | 6.394          | 367458  | 5.59   |
| 2 | 11.261         | 6208176 | 94.41  |

**Dimethyl 2-{1-(4-methoxyphenyl)-2-[1-(naphthalen-2-yl)-1H-tetrazol-5-yl]-2-(naphthalen-2-ylimino)ethyl}malonate (5p)**

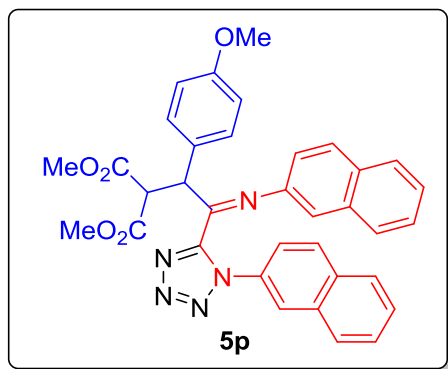

Yellow solid; m.p. 50-52 °C; 93% yield, 84.5:15.5 e.r.;  $[\alpha]_D^{26} = -233.4$  ( $c = 0.99$  in  $\text{CH}_2\text{Cl}_2$ ).

**HPLC** DAICEL CHIRALCEL IA, *n*-hexane/2-propanol = 70/30, flow rate = 1.0 mL/min,  $\lambda = 330$  nm,  $t_R$  (minor) = 8.14 min,  $t_R$  (major) = 14.18 min.

**IR** (neat): 1744, 1605, 1510, 1437, 1302, 1258, 1182, 1032, 858, 816 and 748  $\text{cm}^{-1}$ .

**$^1\text{H}$  NMR** (400 MHz,  $\text{CDCl}_3$ )  $\delta = 7.70 - 7.66$  (m, 1H), 7.60 - 7.30 (m, 7H), 7.29 - 7.26 (m, 1H), 7.21 - 7.16 (m, 1H), 7.09 (t,  $J = 8.8$  Hz, 2H), 7.00 - 6.91 (m, 2H), 6.44 (s, 1H), 6.36 - 6.28 (m, 1H), 6.17 - 6.07 (m, 1H), 6.02 - 5.90 (m, 1H), 5.34 (d,  $J = 12.0$  Hz, 1H), 4.79 (d,  $J = 11.6$  Hz, 1H), 3.82 (s, 3H), 3.77 (s, 3H), 3.55 (s, 3H).

**$^{13}\text{C}\{^1\text{H}\}$  NMR** (101 MHz,  $\text{CDCl}_3$ )  $\delta = 168.3, 168.0, 160.0, 156.0, 149.7, 145.2, 133.4, 133.2, 132.4, 131.0, 130.7, 130.2, 129.1, 128.6, 128.1, 127.7, 127.5, 127.4, 127.2, 126.5, 126.2, 125.7, 122.7, 120.8, 119.4, 116.6, 114.9, 55.4, 55.3, 53.6, 53.0, 52.7$ .

**HRMS** (ESI-FT) calcd for  $\text{C}_{35}\text{H}_{30}\text{N}_5\text{O}_5^+$  ( $[\text{M}+\text{H}^+]$ ) = 600.2241, Found 600.2238.

Chiral HPLC spectrum **5p**:

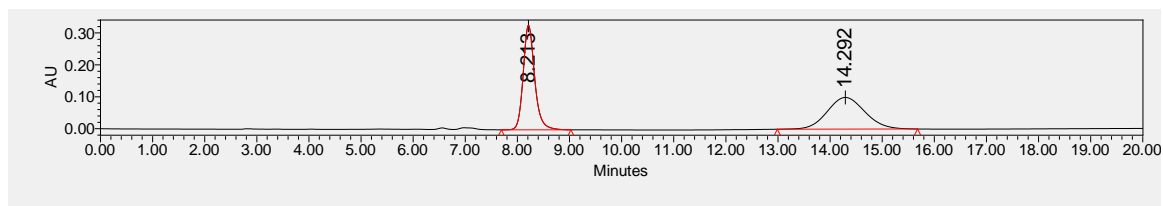

|   | Retention Time | Area    | % Area |
|---|----------------|---------|--------|
| 1 | 8.213          | 4977243 | 49.88  |
| 2 | 14.292         | 5000261 | 50.12  |

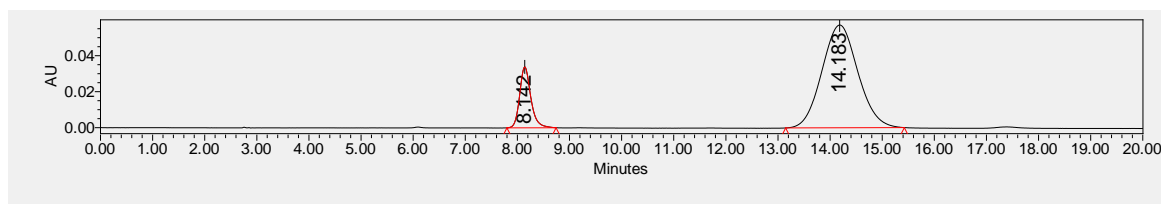

|   | Retention Time | Area    | % Area |
|---|----------------|---------|--------|
| 1 | 8.142          | 503006  | 15.54  |
| 2 | 14.183         | 2734798 | 84.46  |

**Dimethyl 2-{1-(4-cyanophenyl)-2-[1-(naphthalen-2-yl)-1H-tetrazol-5-yl]-2-(naphthalen-2-ylimino)ethyl}malonate (5q)**

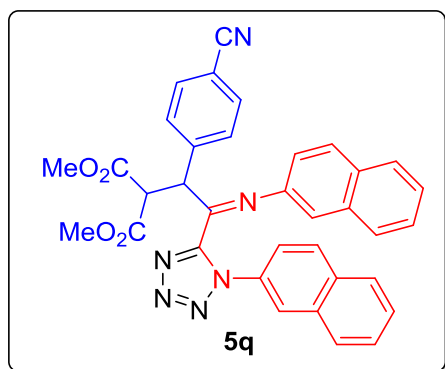

Yellow solid; m.p. 68-72 °C; 97% yield, 95:5 e.r.;  $[\alpha]_D^{26} = -199.4$  ( $c = 1.07$  in  $\text{CH}_2\text{Cl}_2$ ).

**HPLC** DAICEL CHIRALCEL IA,  $n$ -hexane/2-propanol = 70/30, flow rate = 1.0 mL/min,  $\lambda = 330$  nm,  $t_R$  (minor) = 10.87 min,  $t_R$  (major) = 24.29 min.

**IR** (neat): 1744, 1508, 1437, 1302, 1267, 1150, 1030, 856, 816 and 746  $\text{cm}^{-1}$ .

**$^1\text{H}$  NMR** (400 MHz,  $\text{CDCl}_3$ )  $\delta = 7.77 - 7.42$  (m, 9H), 7.39 – 7.32 (m, 2H), 7.30 – 7.23 (m, 1H), 7.09 (t,  $J = 9.6$  Hz, 2H), 6.83 (s, 1H), 6.30 (s, 1H), 6.28 – 6.18 (m, 1H), 6.14 – 6.96 (m, 1H), 5.35 (d,  $J = 11.6$  Hz, 1H), 4.76 (d,  $J = 11.6$  Hz, 1H), 3.84 (s, 3H), 3.54 (s, 3H).

**$^{13}\text{C}\{^1\text{H}\}$  NMR** (101 MHz,  $\text{CDCl}_3$ )  $\delta = 168.1, 167.4, 154.4, 149.2, 144.7, 140.6, 133.2, 132.9, 132.4, 131.2, 130.4, 130.1, 129.2, 128.8, 128.1, 127.8, 127.7, 127.5, 127.4, 126.7, 126.0, 122.8, 120.6, 119.0, 118.3, 116.7, 112.8, 55.7, 54.1, 53.3, 53.0$ .

HRMS (ESI-FT) calcd for C<sub>35</sub>H<sub>27</sub>N<sub>6</sub>O<sub>4</sub><sup>+</sup> ([M+H<sup>+</sup>]) = 595.2088, Found 595.2082.

Chiral HPLC spectrum **5q**:

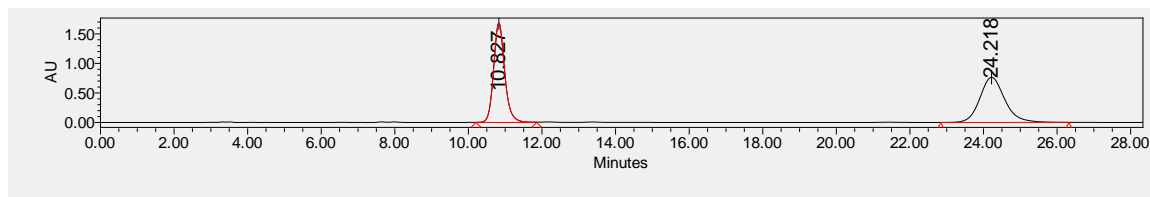

|   | Retention Time | Area     | % Area |
|---|----------------|----------|--------|
| 1 | 10.827         | 35244053 | 49.59  |
| 2 | 24.218         | 35825609 | 50.41  |

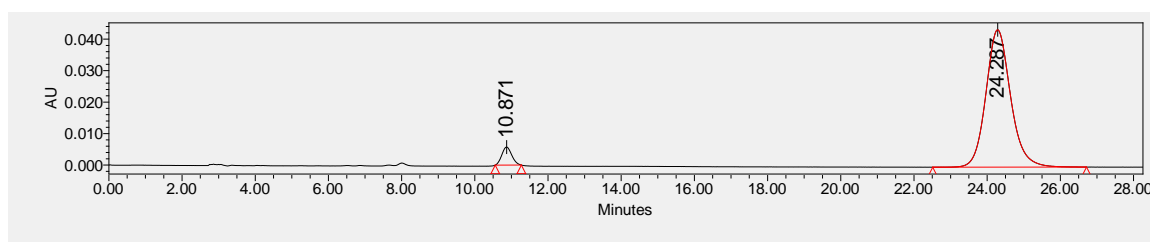

|   | Retention Time | Area    | % Area |
|---|----------------|---------|--------|
| 1 | 10.871         | 108113  | 5.03   |
| 2 | 24.287         | 2039561 | 94.97  |

Dimethyl 2-{1-(4-chlorophenyl)-2-[1-(naphthalen-2-yl)-1H-tetrazol-5-yl]-2-(naphthalen-2-ylimino)ethyl}malonate (**5r**)

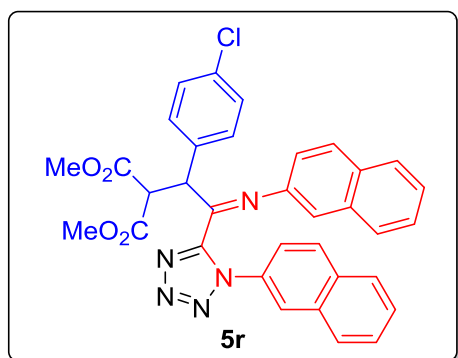

Yellow solid; m.p. 56-60 °C; 98% yield, 94:6 e.r.;  $[\alpha]_D^{26} = -266.4$  ( $c = 0.93$  in CH<sub>2</sub>Cl<sub>2</sub>).

HPLC DAICEL CHIRALCEL IA, *n*-hexane/2-propanol = 70/30, flow rate = 1.0 mL/min,  $\lambda = 330$  nm,  $t_R$  (minor) = 7.76 min,  $t_R$  (major) = 13.78 min.

IR (neat): 1744, 1649, 1495, 1437, 1302, 1265, 1096, 1024, 858, 814 and 745 cm<sup>-1</sup>.

<sup>1</sup>H NMR (400 MHz, CDCl<sub>3</sub>)  $\delta = 7.73 - 7.67$  (m, 1H), 7.60 - 7.50 (m, 2H), 7.49 - 7.33 (m, 6H), 7.31 - 7.19 (m, 3H), 7.11 (t,  $J = 9.2$  Hz, 2H), 6.56 (s, 1H), 6.38 - 6.25



(m, 1H), 6.22 – 5.94 (m, 2H), 5.34 (d,  $J = 11.6$  Hz, 1H), 4.77 (d,  $J = 11.6$  Hz, 1H), 3.79 (s, 3H), 3.56 (s, 3H).

$^{13}\text{C}\{^1\text{H}\}$  NMR (101 MHz,  $\text{CDCl}_3$ )  $\delta = 168.2, 167.7, 155.3, 149.5, 144.9, 135.0, 133.4, 133.3, 133.2, 132.4, 131.2, 130.9, 130.2, 129.7, 129.2, 128.7, 128.1, 127.8, 127.7, 127.6, 127.5, 127.3, 126.6, 125.9, 122.8, 120.8, 119.3, 116.7, 55.5, 53.7, 53.2, 52.9$ .

HRMS (ESI-FT) calcd for  $\text{C}_{34}\text{H}_{27}^{35}\text{ClN}_5\text{O}_4^+$  ( $[\text{M}+\text{H}^+]$ ) = 604.1746, Found 604.1741.

HRMS (ESI-FT) calcd for  $\text{C}_{34}\text{H}_{27}^{37}\text{ClN}_5\text{O}_4^+$  ( $[\text{M}+\text{H}^+]$ ) = 606.1717, Found 606.1721.

Chiral HPLC spectrum **5r**:

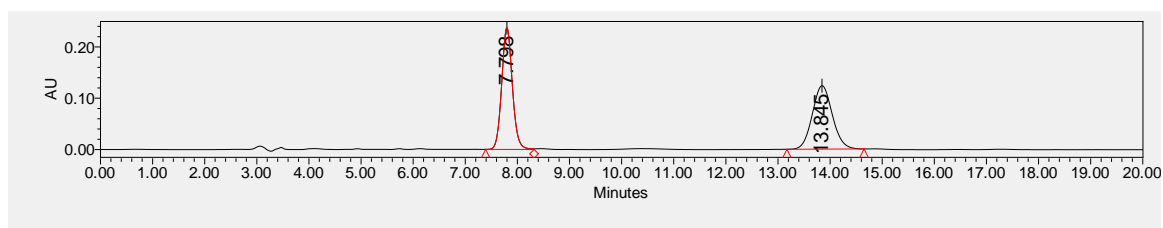

|   | Retention Time | Area    | % Area |
|---|----------------|---------|--------|
| 1 | 7.798          | 3354782 | 50.41  |
| 2 | 13.845         | 3300398 | 49.59  |

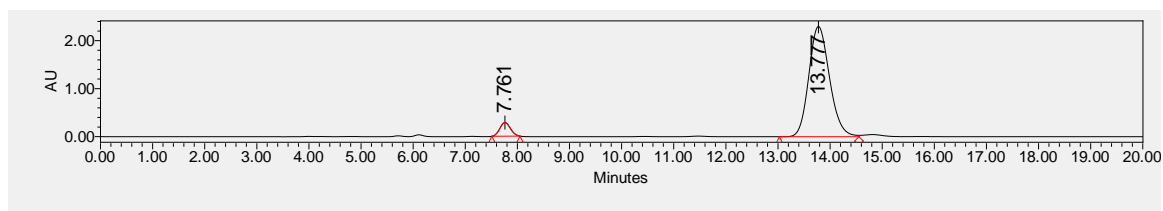

|   | Retention Time | Area     | % Area |
|---|----------------|----------|--------|
| 1 | 7.761          | 4020600  | 5.95   |
| 2 | 13.777         | 63495850 | 94.05  |

**Dimethyl 2-{1-(3-chlorophenyl)-2-[1-(naphthalen-2-yl)-1H-tetrazol-5-yl]-2-(naphthalen-2-ylimino)ethyl}malonate (**5s**)**

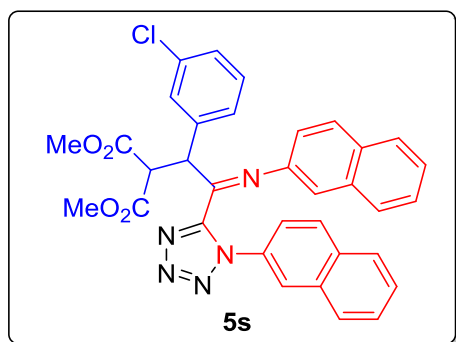

Yellow solid; m.p. 46-48 °C; 95% yield, 92:8 e.r.;  $[\alpha]_D^{26} = -238.3$  ( $c = 1.00$  in  $\text{CH}_2\text{Cl}_2$ ).

**HPLC** DAICEL CHIRALCEL IA, *n*-hexane/2-propanol = 70/30, flow rate = 1.0 mL/min,  $\lambda = 330$  nm,  $t_R$  (minor) = 5.96 min,  $t_R$  (major) = 10.32 min.

**IR** (neat): 1744, 1649, 1495, 1435, 1298, 1265, 1150, 1030, 815, 748 and 696  $\text{cm}^{-1}$ .

**$^1\text{H}$  NMR** (400 MHz,  $\text{CDCl}_3$ )  $\delta = 7.72 - 7.67$  (m, 1H), 7.60 - 7.50 (m, 3H), 7.48 - 7.30 (m, 6H), 7.28 - 7.19 (m, 2H), 7.09 (t,  $J = 8.8$  Hz, 2H), 6.60 - 6.50 (m, 1H), 6.39 - 6.24 (m, 1H), 6.21 - 5.95 (m, 2H), 5.39 (d,  $J = 11.6$  Hz, 1H), 4.76 (d,  $J = 11.6$  Hz, 1H), 3.78 (s, 3H), 3.58 (s, 3H).

**$^{13}\text{C}\{^1\text{H}\}$  NMR** (101 MHz,  $\text{CDCl}_3$ )  $\delta = 168.1, 167.7, 155.1, 149.3, 144.9, 136.9, 135.3, 133.3, 133.2, 132.4, 131.2, 130.7, 130.2, 129.2, 128.7, 128.2, 127.8, 127.7, 127.4, 127.3, 126.6, 125.9, 122.7, 120.7, 119.2, 116.7, 55.4, 53.9, 53.2, 52.9$ .

**HRMS** (ESI-FT) calcd for  $\text{C}_{34}\text{H}_{27}^{35}\text{ClN}_5\text{O}_4^+$  ( $[\text{M}+\text{H}^+]$ ) = 604.1746, Found 604.1744.

**HRMS** (ESI-FT) calcd for  $\text{C}_{34}\text{H}_{27}^{37}\text{ClN}_5\text{O}_4^+$  ( $[\text{M}+\text{H}^+]$ ) = 606.1717, Found 606.1724.

Chiral HPLC spectrum **5s**:

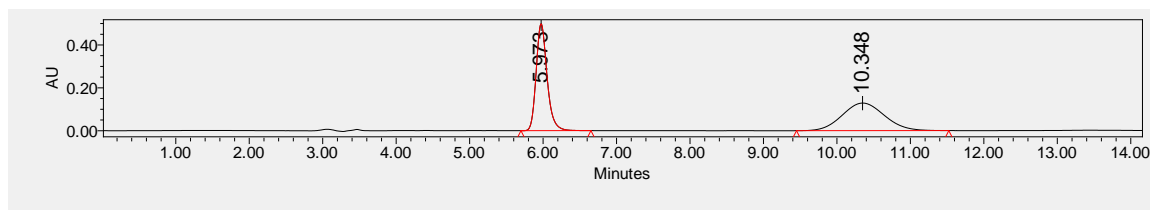

|   | Retention Time | Area    | % Area |
|---|----------------|---------|--------|
| 1 | 5.973          | 5154938 | 50.05  |
| 2 | 10.348         | 5145665 | 49.95  |

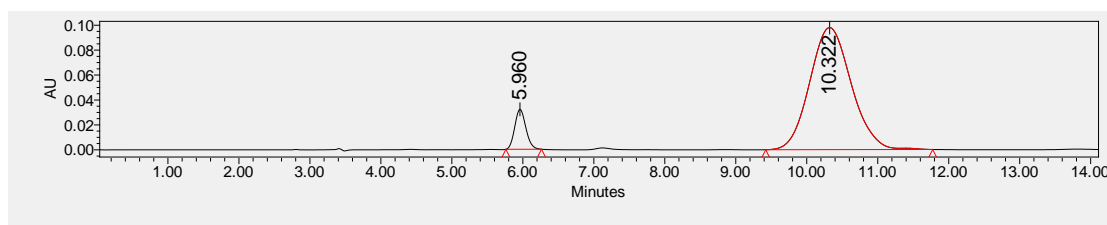

|   | Retention Time | Area    | % Area |
|---|----------------|---------|--------|
| 1 | 5.960          | 348494  | 8.05   |
| 2 | 10.322         | 3983263 | 91.95  |

**Dimethyl 2-{1-(2-chlorophenyl)-2-[1-(naphthalen-2-yl)-1H-tetrazol-5-yl]-2-(naphthalen-2-ylimino)ethyl}malonate (5t)**

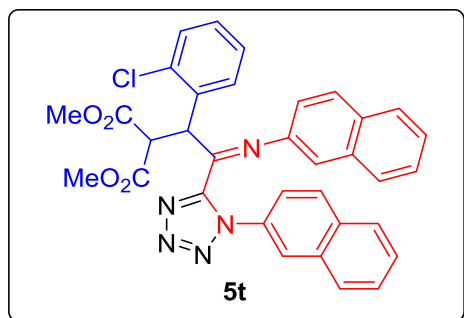

Yellow solid; m.p. 46-48 °C; 62% yield, 76.5:23.5 e.r.;  $[\alpha]_D^{26} = -133.30$  ( $c = 0.87$  in  $\text{CH}_2\text{Cl}_2$ ).

**HPLC** DAICEL CHIRALCEL IA, *n*-hexane/2-propanol = 70/30, flow rate = 1.0 mL/min,  $\lambda = 330$  nm,  $t_R$  (minor) = 6.28 min,  $t_R$  (major) = 8.84 min.

**IR** (neat): 1742, 1649, 1512, 1437, 1300, 1265, 1148, 1036, 860, 815 and 750  $\text{cm}^{-1}$ .

**$^1\text{H}$  NMR** (400 MHz,  $\text{CDCl}_3$ )  $\delta = 7.75 - 7.30$  (m, 11H), 7.29 - 7.21 (m, 1H), 7.16 - 7.07 (m, 1H), 7.00 - 6.12 (m, 1H), 6.40 - 5.89 (m, 4H), 4.97 - 4.66 (m, 1H), 3.82 (s, 3H), 3.56 (s, 3H).

**$^{13}\text{C}\{^1\text{H}\}$  NMR** (101 MHz,  $\text{CDCl}_3$ )  $\delta = 168.3, 167.5, 149.1, 144.9, 135.9, 133.3, 133.2, 132.5, 131.2, 130.7, 130.3, 130.0, 129.7, 129.2, 128.7, 128.3, 127.7, 127.6, 127.5, 127.3, 126.6, 125.8, 122.7, 120.9, 119.3, 116.8, 100.1, 55.7, 53.1, 52.8, 49.2$ .

**HRMS** (ESI-FT) calcd for  $\text{C}_{34}\text{H}_{27}^{35}\text{ClN}_5\text{O}_4^+$  ( $[\text{M}+\text{H}^+]$ ) = 604.1746, Found 604.1742.

**HRMS** (ESI-FT) calcd for  $\text{C}_{34}\text{H}_{27}^{37}\text{ClN}_5\text{O}_4^+$  ( $[\text{M}+\text{H}^+]$ ) = 606.1717, Found 606.1722.

Chiral HPLC spectrum **5t**:

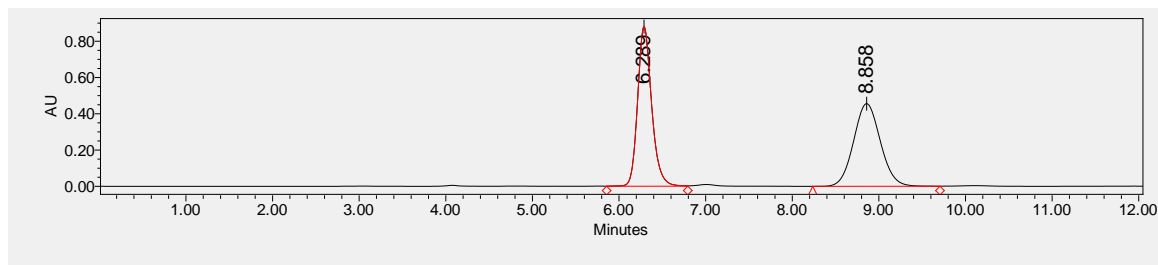

|   | Retention Time | Area    | % Area |
|---|----------------|---------|--------|
| 1 | 5.960          | 338051  | 8.03   |
| 2 | 10.321         | 3870204 | 91.97  |

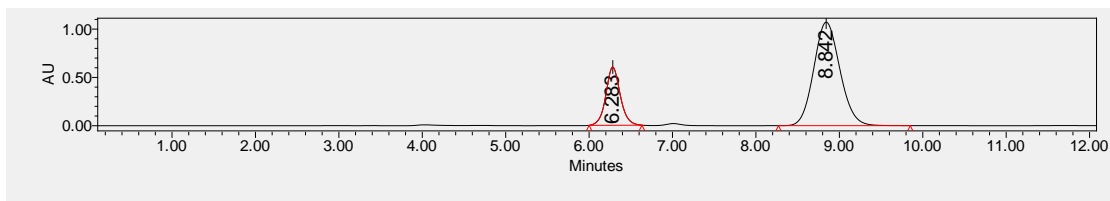

|   | Retention Time | Area     | % Area |
|---|----------------|----------|--------|
| 1 | 6.283          | 7197018  | 23.55  |
| 2 | 8.842          | 23357130 | 76.45  |

**Dimethyl 2-{1-(3,4-dichlorophenyl)-2-[1-(naphthalen-2-yl)-1H-tetrazol-5-yl]-2-(naphthalene-2-ylimino)ethyl}malonate (**5u**)**

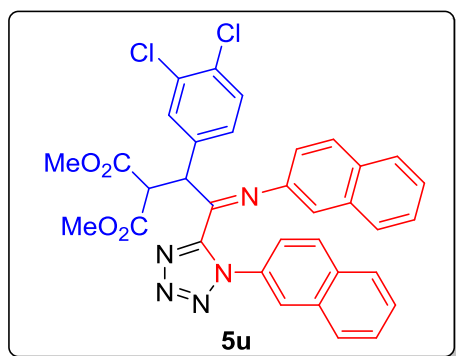

Yellow solid; m.p. 48-52 °C; 92% yield, 93:7 e.r.;  $[\alpha]_D^{26} = -221.0$  ( $c = 0.91$  in  $\text{CH}_2\text{Cl}_2$ ).

**HPLC** DAICEL CHIRALCEL IA, *n*-hexane/2-propanol = 70/30, flow rate = 1.0 mL/min,  $\lambda = 330$  nm,  $t_R$  (minor) = 6.92 min,  $t_R$  (major) = 12.08 min.

**IR** (neat): 1744, 1649, 1510, 1467, 1296, 1265, 1143, 1031, 860, 816 and 745  $\text{cm}^{-1}$ .

**$^1\text{H}$  NMR** (400 MHz,  $\text{CDCl}_3$ )  $\delta = 7.75 - 7.68$  (m, 1H), 7.66 - 7.61 (m, 1H), 7.60 - 7.43 (m, 4H), 7.40 - 7.29 (m, 3H), 7.29 - 7.22 (m, 2H), 7.11 (t,  $J = 8.4$  Hz, 2H), 6.71 (s, 1H), 6.42 - 6.28 (m, 1H), 6.26 - 6.00 (m, 2H), 5.31 (d,  $J = 11.6$  Hz, 1H), 4.71 (d,  $J = 11.6$  Hz, 1H), 3.80 (s, 3H), 3.59 (s, 3H).

**$^{13}\text{C}\{^1\text{H}\}$  NMR** (101 MHz,  $\text{CDCl}_3$ )  $\delta = 168.0, 167.5, 154.7, 149.3, 144.8, 135.3, 133.5, 133.3, 133.2, 132.4, 131.3, 131.1, 130.2, 129.3, 128.8, 128.2, 127.8, 127.7, 127.6, 127.5, 127.4, 126.7, 126.0, 122.8, 120.7, 119.2, 116.8, 55.7, 53.3, 53.2, 53.0$ .

**HRMS** (ESI-FT) calcd for  $\text{C}_{34}\text{H}_{26}^{35}\text{Cl}_2\text{N}_5\text{O}_4^+$  ( $[\text{M}+\text{H}^+]$ ) = 638.1356, Found 638.1351.

**HRMS** (ESI-FT) calcd for  $\text{C}_{34}\text{H}_{26}^{35}\text{Cl}^{37}\text{ClN}_5\text{O}_4^+$  ( $[\text{M}+\text{H}^+]$ ) = 640.1327, Found 640.1328.

**HRMS** (ESI-FT) calcd for  $C_{34}H_{26}^{37}Cl_2N_5O_4^+$  ( $[M+H]^+$ ) = 642.1297, Found 642.1313.

Chiral HPLC spectrum **5u**:

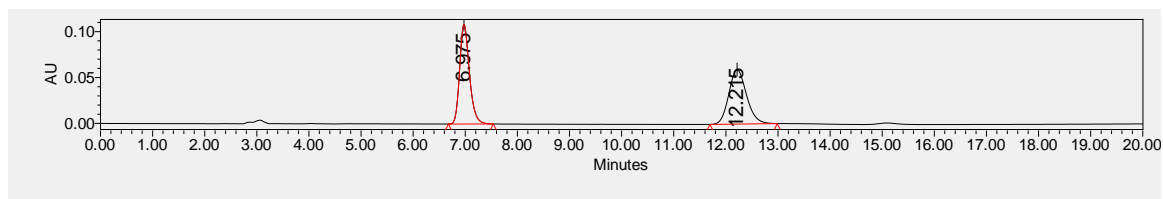

|   | Retention Time | Area    | % Area |
|---|----------------|---------|--------|
| 1 | 6.975          | 1416101 | 50.29  |
| 2 | 12.215         | 1400017 | 49.71  |

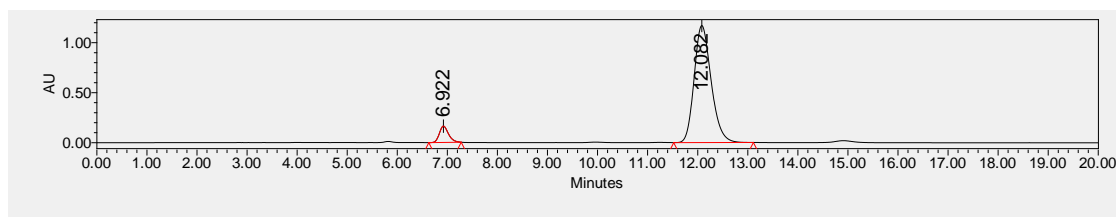

|   | Retention Time | Area     | % Area |
|---|----------------|----------|--------|
| 1 | 6.922          | 2069486  | 6.96   |
| 2 | 12.082         | 27659934 | 93.04  |

**Dimethyl 2-{2-[1-(naphthalen-2-yl)-1H-tetrazol-5-yl]-2-(naphthalen-2-ylimino)-1-(*m*-tolyl)ethyl}malonate (**5v**)**

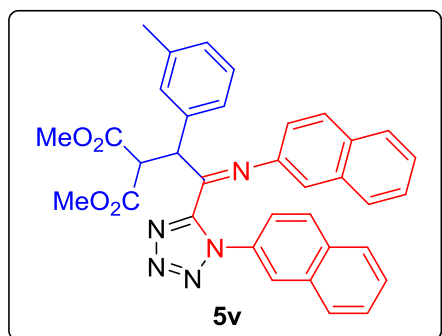

Yellow solid; m.p. 44-46 °C; 84% yield, 89:11 e.r.;  $[\alpha]_D^{26} = -227.1$  (c = 0.83 in  $CH_2Cl_2$ ).

**HPLC** DAICEL CHIRALCEL IA, n-hexane/2-propanol = 70/30, flow rate = 1.0 mL/min,  $\lambda = 330$  nm,  $t_R$  (minor) = 5.63 min,  $t_R$  (major) = 10.29 min.

**IR** (neat): 1744, 1649, 1512, 1437, 1300, 1267, 1150, 1034, 860, 815, 750 and 705  $cm^{-1}$ .

$^1\text{H}$  NMR (400 MHz,  $\text{CDCl}_3$ )  $\delta$  = 7.71 – 7.65 (m, 1H), 7.59 – 7.49 (m, 2H), 7.46 – 7.28 (m, 5H), 7.26 – 7.14 (m, 4H), 7.09 (t,  $J$  = 7.6 Hz, 2H), 6.47 – 6.18 (m, 2H), 6.18 – 6.04 (m, 1H), 6.01 – 5.85 (m, 1H), 5.37 (d,  $J$  = 12.0 Hz, 1H), 4.83 (d,  $J$  = 12.0 Hz, 1H), 3.77 (s, 3H), 3.55 (s, 3H), 2.38 (s, 3H).

$^{13}\text{C}\{^1\text{H}\}$  NMR (101 MHz,  $\text{CDCl}_3$ )  $\delta$  = 168.3, 167.9, 156.0, 149.6, 145.2, 139.3, 134.5, 133.4, 133.1, 132.4, 131.0, 130.2, 129.7, 129.4, 129.0, 128.6, 128.2, 127.7, 127.6, 127.5, 127.4, 127.2, 126.5, 125.7, 122.7, 120.8, 119.3, 116.6, 55.2, 54.3, 53.1, 52.7, 21.6.

HRMS (ESI-FT) calcd for  $\text{C}_{35}\text{H}_{30}\text{N}_5\text{O}_4^+$  ( $[\text{M}+\text{H}^+]$ ) = 584.2292, Found 584.2291.

Chiral HPLC spectrum **5v**:

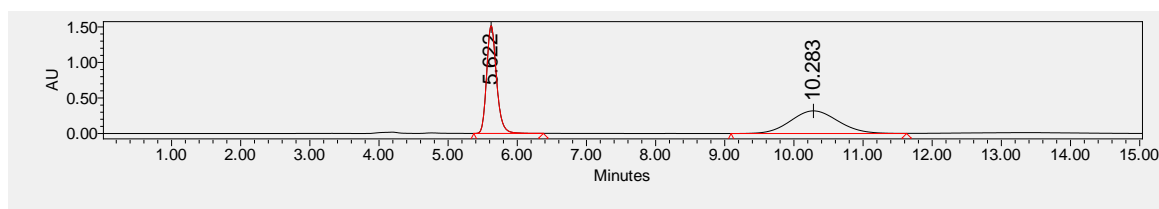

|   | Retention Time | Area     | % Area |
|---|----------------|----------|--------|
| 1 | 5.622          | 15053800 | 49.64  |
| 2 | 10.283         | 15271756 | 50.36  |

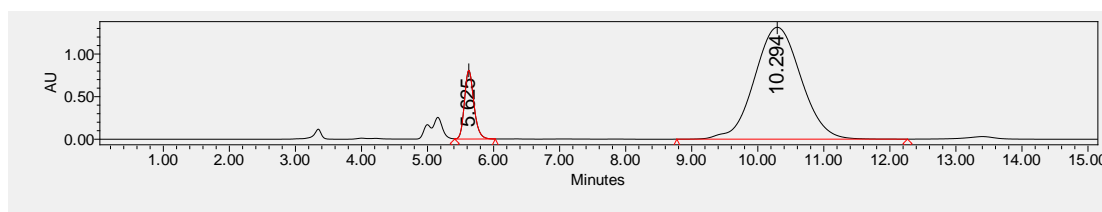

|   | Retention Time | Area     | % Area |
|---|----------------|----------|--------|
| 1 | 5.625          | 7991841  | 11.06  |
| 2 | 10.294         | 64293561 | 88.94  |

**Dimethyl 2-{1-(naphthalen-2-yl)-2-[1-(naphthalen-2-yl)-1H-tetrazol-5-yl]-2-(naphthalen-2-ylimino)ethyl}malonate (**5w**)**

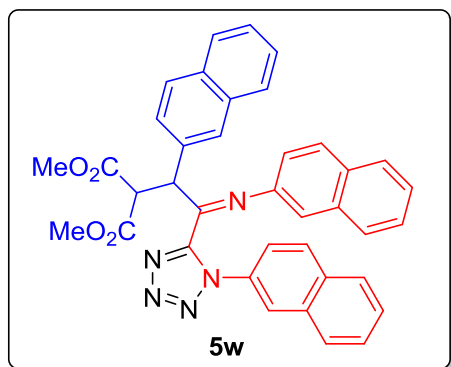

Yellow solid; m.p. 56-60 °C; 97% yield, 92.5:7.5 e.r.;  $[\alpha]_D^{26} = -218.3$  ( $c = 0.84$  in  $\text{CH}_2\text{Cl}_2$ ).

**HPLC** DAICEL CHIRALCEL IA, *n*-hexane/2-propanol = 70/30, flow rate = 1.0 mL/min,  $\lambda = 330$  nm,  $t_R$  (minor) = 8.51 min,  $t_R$  (major) = 14.47 min.

**IR** (neat): 1744, 1597, 1510, 1437, 1300, 1267, 1153, 1028, 893, 860, 815 and 750  $\text{cm}^{-1}$ .

**$^1\text{H}$  NMR** (400 MHz,  $\text{CDCl}_3$ )  $\delta = 8.00 - 7.19$  (m, 26H), 7.16 – 7.01 (m, 2H), 7.01 – 6.86 (m, 2H), 6.41 – 6.32 (m, 1H), 6.25 (s, 1H), 6.20 – 6.12 (m, 1H), 5.92 – 5.80 (m, 1H), 5.58 (d,  $J = 11.6$  Hz, 1H), 5.05 – 4.93 (m, 1.62H), 4.90 – 4.85 (m, 0.62H), 3.80 (s, 3H), 3.72 (s, 2H), 3.48 (s, 3H), 3.35 (s, 2H).

**$^{13}\text{C}\{^1\text{H}\}$  NMR** (101 MHz,  $\text{CDCl}_3$ )  $\delta = 168.3, 167.9, 167.2, 155.9, 155.8, 149.7, 145.2, 133.8, 133.7, 133.4, 133.3, 133.1, 132.9, 132.2, 132.0, 131.9, 131.1, 130.7, 130.2, 130.1, 129.3, 129.2, 129.1, 129.0, 128.7, 128.5, 128.4, 128.3, 128.2, 128.1, 128.0, 127.8, 127.7, 127.6, 127.6, 127.4, 127.1, 127.0, 126.9, 126.8, 126.5, 125.8, 125.3, 122.9, 122.6, 120.8, 119.4, 116.7, 57.0, 55.4, 54.5, 53.3, 53.1, 52.8, 40.9$ .

**HRMS** (ESI-FT) calcd for  $\text{C}_{38}\text{H}_{30}\text{N}_5\text{O}_4^+$  ( $[\text{M}+\text{H}^+]$ ) = 620.2292, Found 620.2289.

Chiral HPLC spectrum **5w**:

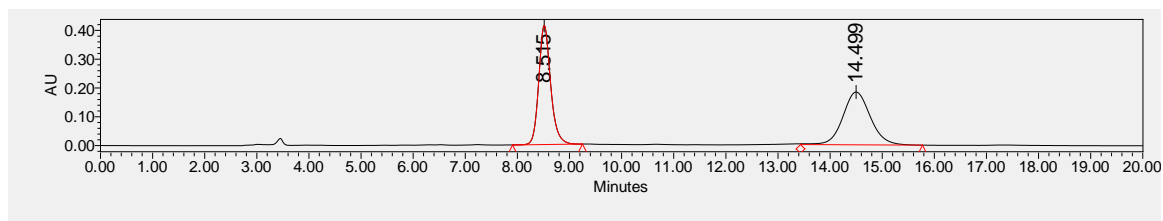

|   | Retention Time | Area    | % Area |
|---|----------------|---------|--------|
| 1 | 8.515          | 6567129 | 49.27  |
| 2 | 14.499         | 6762011 | 50.73  |

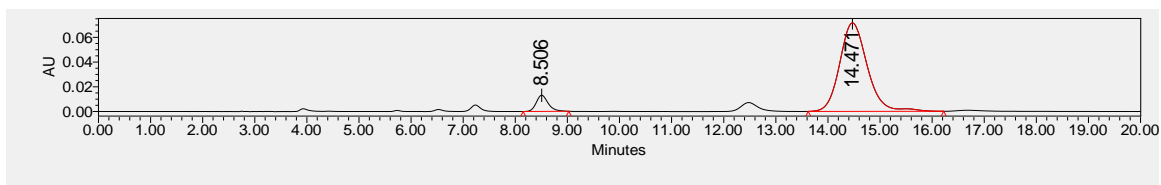

|   | Retention Time | Area    | % Area |
|---|----------------|---------|--------|
| 1 | 8.506          | 208683  | 7.35   |
| 2 | 14.471         | 2628949 | 92.65  |

**Dimethyl 2-{1-(4-cyanophenyl)-2-[1-(4-methoxyphenyl)-1H-tetrazol-5-yl]-2-[(4-methoxyphenyl)imino]ethyl}malonate (5x)**

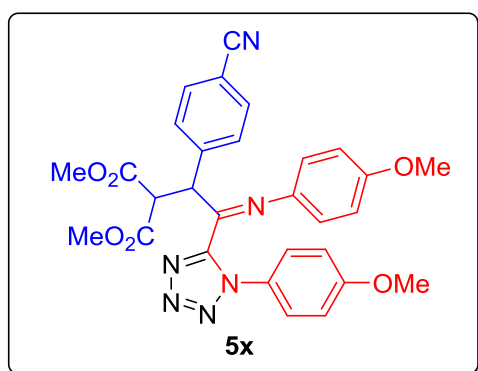

Yellow solid; m.p. 66-70 °C; 92% yield, 93:7 e.r.;  $[\alpha]_D^{21} = -237.05$  ( $c = 0.89$  in  $\text{CH}_2\text{Cl}_2$ ).

**HPLC** DAICEL CHIRALCEL IA, *n*-hexane/2-propanol = 70/30, flow rate = 1.0 mL/min,  $\lambda = 254$  nm,  $t_R$  (minor) = 10.32 min,  $t_R$  (major) = 25.23 min.

**IR** (neat): 2956, 1738, 1606, 1517, 1437, 1302, 1275, 1251, 1181, 1029, 833 and 750  $\text{cm}^{-1}$ .

**$^1\text{H}$  NMR** (400 MHz,  $\text{CDCl}_3$ )  $\delta = 7.68 - 7.58$  (m, 2H), 7.52 - 7.46 (m, 2H), 6.64 - 6.58 (m, 1H), 6.54 - 6.47 (m, 2H), 6.41 - 6.30 (m, 2H), 6.14 - 6.04 (m, 2H), 5.14 (d,  $J = 12.0$  Hz, 1H), 4.66 (d,  $J = 11.6$  Hz, 1H), 3.79 (s, 3H), 3.77 (s, 3H), 3.70 (s, 3H), 3.50 (s, 3H).

**$^{13}\text{C}\{^1\text{H}\}$  NMR** (101 MHz,  $\text{CDCl}_3$ )  $\delta = 167.9, 167.5, 160.9, 158.1, 152.7, 149.1, 140.6, 132.8, 130.3, 125.8, 125.1, 121.5, 118.4, 114.3, 114.2, 112.6, 55.8, 55.6, 55.5, 54.1, 53.2, 52.9$ .

**HRMS** (ESI-FT) calcd for  $\text{C}_{29}\text{H}_{27}\text{N}_6\text{O}_6^+$  ( $[\text{M}+\text{H}^+]$ ) = 555.1987, Found 555.1989.



Chiral HPLC spectrum **5x**:

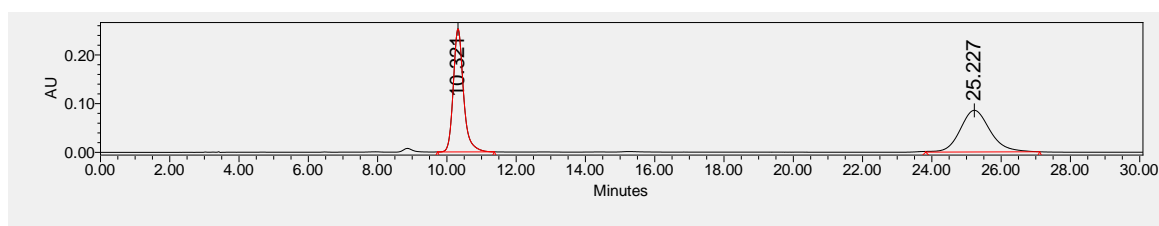

|   | Retention Time | % Area | Height |
|---|----------------|--------|--------|
| 1 | 10.321         | 50.12  | 252751 |
| 2 | 25.227         | 49.88  | 85576  |

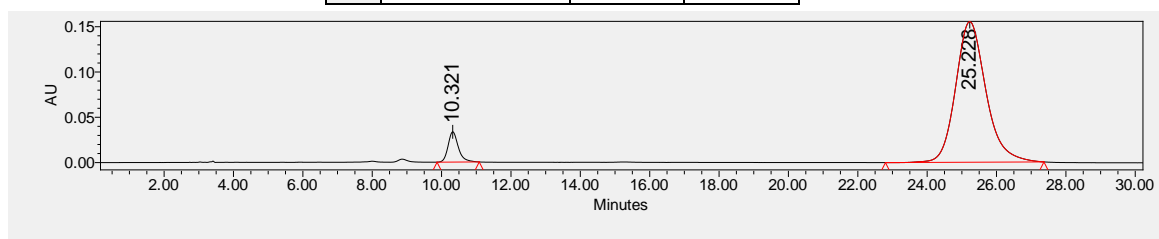

|   | Retention Time | % Area | Height |
|---|----------------|--------|--------|
| 1 | 10.321         | 6.80   | 33482  |
| 2 | 25.228         | 93.20  | 155299 |

**Dimethyl 2-{1-[1-(4-methoxyphenyl)-1H-tetrazol-5-yl]-1-[(4-methoxyphenyl)imino]-3,3-dimethylbutan-2-yl}malonate (**5z**)**

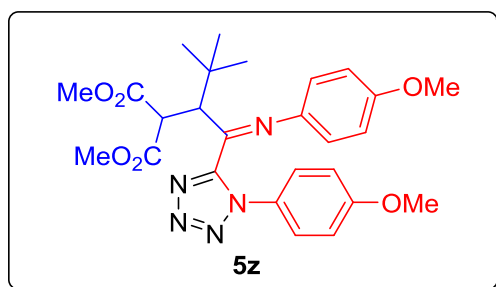

Yellow solid; m.p. 38-42 °C; 91% yield, 85:15 e.r.;  $[\alpha]_D^{21} = -352.99$  ( $c = 0.34$  in  $\text{CH}_2\text{Cl}_2$ ).

**HPLC** DAICEL CHIRALCEL IC, *n*-hexane/2-propanol = 70/30, flow rate = 1.0 mL/min,  $\lambda = 254$  nm,  $t_R$  (minor) = 15.53 min,  $t_R$  (major) = 19.39 min.

**IR** (neat): 2956, 1754, 1734, 1606, 1516, 1504, 1466, 1437, 1276, 1251, 1168, 1030, 832 and 749  $\text{cm}^{-1}$ .

**$^1\text{H}$  NMR** (400 MHz,  $\text{CDCl}_3$ )  $\delta = 7.49 - 7.43$  (m, 1.36H),  $7.04 - 6.94$  (m, 3.55H), 6.88 (s, 2.58H),  $6.77 - 6.72$  (m, 2H),  $6.53 - 6.44$  (m, 2H),  $6.22 - 6.13$  (m, 2H), 4.65 (d,  $J =$

10.4 Hz, 0.68H), 4.23 – 4.06 (m, 2.75H), 3.90 (s, 2H), 3.83 (s, 3H), 3.80 (s, 2H), 3.77 (s, 4H), 3.72 (s, 3H), 3.71 (s, 3H), 3.61 (s, 3H), 1.10 (s, 8H), 0.60 (s, 6H).

$^{13}\text{C}\{^1\text{H}\}$  NMR (101 MHz,  $\text{CDCl}_3$ )  $\delta$  = 170.5, 169.9, 169.5, 160.8, 160.6, 157.4, 157.0, 155.5, 155.1, 152.9, 150.5, 142.0, 141.4, 128.7, 128.2, 127.6, 127.2, 125.8, 121.3, 120.8, 114.2, 113.8, 56.4, 55.8, 55.56, 55.5, 54.0, 53.3, 53.0, 52.8, 52.7, 52.5, 48.6, 35.9, 35.4, 28.6, 28.5, 27.7.

HRMS (ESI-FT) calcd for  $\text{C}_{26}\text{H}_{32}\text{N}_5\text{O}_6^+$  ( $[\text{M}+\text{H}^+]$ ) = 510.2347, Found 510.2343.

Chiral HPLC spectrum **5z**:

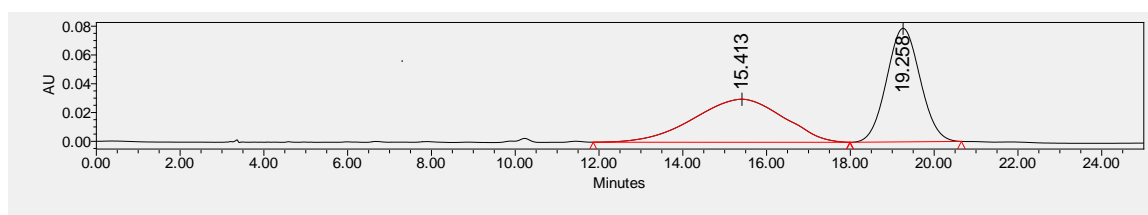

|   | Retention Time | % Area | Height |
|---|----------------|--------|--------|
| 1 | 15.413         | 50.29  | 29894  |
| 2 | 19.258         | 49.71  | 78921  |

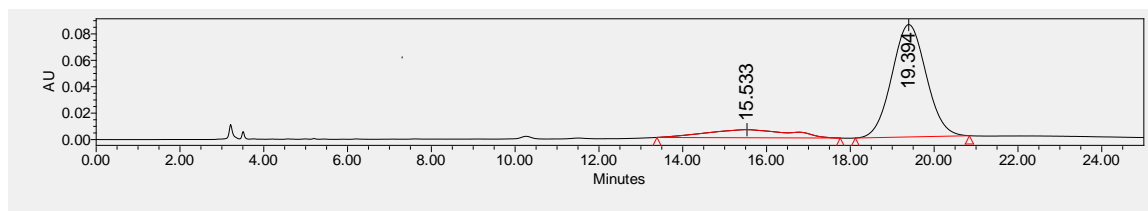

|   | Retention Time | % Area | Height |
|---|----------------|--------|--------|
| 1 | 15.533         | 15.10  | 6126   |
| 2 | 19.394         | 84.90  | 85055  |

**Dimethyl 2-((2*S*,4*S*)-4,8-dimethyl-1-[1-(naphthalen-2-yl)-1*H*-tetrazol-5-yl]-1-(naphthalen-2-ylimino)non-7-en-2-yl)malonate (**5y**)**

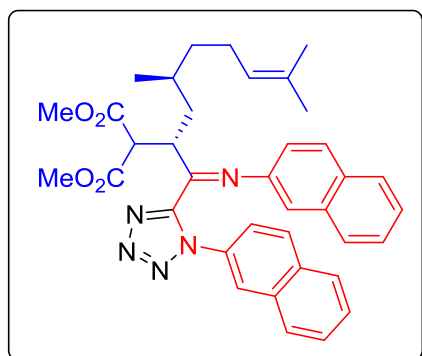

**5y**: 96% yield, 2.0:1 d.r.  
*ent*-**L**-**RaPr**<sub>2</sub>: 95% yield, 1:4.0 d.r.

Yellow oil; 96% (95%) yield, 2.0:1 (1:4) d.r.;  $[\alpha]_D^{21} = -66.59 (+135.66)$  ( $c = 0.34$  in  $\text{CH}_2\text{Cl}_2$ ).

**IR** (neat): 2988, 1734, 1625, 1596, 1505, 1437, 1411, 1275, 1258, 764 and  $750\text{ cm}^{-1}$ .

**$^1\text{H}$  NMR** (400 MHz,  $\text{CDCl}_3$ )  $\delta = 8.14 - 8.06$  (m, 0.46H),  $7.95 - 7.83$  (m, 1.45H),  $7.77 - 7.63$  (m, 3H),  $7.58 - 7.43$  (m, 5.47H),  $7.41 - 7.28$  (m, 3.75H),  $7.24 - 7.18$  (m, 1H),  $7.14 - 7.09$  (m, 0.50H),  $7.06 - 6.98$  (m, 2H),  $6.94 - 6.87$  (m, 0.47H),  $6.78 - 6.70$  (m, 1H),  $6.30 - 6.23$  (m, 1H),  $6.11 - 6.03$  (m, 1H),  $5.14 - 5.07$  (m, 0.70H),  $5.05 - 5.00$  (m, 0.35H),  $4.91 - 4.84$  (m, 0.15H),  $4.69 - 4.56$  (m, 0.5H),  $4.42 - 4.35$  (m, 0.32H),  $4.32 - 4.22$  (m, 1H),  $4.21 - 4.12$  (m, 1H),  $3.81 - 3.68$  (m, 9H),  $2.33 - 2.21$  (m, 0.5H),  $2.09 - 1.91$  (m, 4H),  $1.82 - 1.72$  (m, 1H),  $1.70 - 1.41$  (m, 12H),  $1.09$  (d,  $J = 6.4$  Hz, 1.26H),  $1.02$  (d,  $J = 6.4$  Hz, 2.70H),  $0.62$  (d,  $J = 6.4$  Hz, 0.8H),  $0.17$  (d,  $J = 5.2$  Hz, 0.35H)

**$^{13}\text{C}\{^1\text{H}\}$  NMR** (101 MHz,  $\text{CDCl}_3$ )  $\delta = 169.2, 169.1, 169.0, 157.4, 157.3, 149.7, 149.5, 145.3, 133.2, 133.2, 132.6, 131.7, 131.6, 131.0, 130.9, 130.7, 129.2, 129.1, 128.9, 128.4, 128.0, 127.8, 127.7, 127.6, 127.5, 127.4, 127.3, 127.2, 126.6, 126.4, 125.6, 125.2, 124.8, 124.6, 124.4, 123.4, 122.9, 120.8, 119.3, 116.3, 115.3, 55.0, 54.4, 52.8, 46.2, 46.2, 38.9, 38.8, 37.7, 37.0, 30.6, 30.4, 30.3, 25.9, 25.7, 25.5, 25.4, 25.2, 19.9, 19.8, 19.5, 17.8, 17.7$ .

**HRMS** (ESI-FT) calcd for  $\text{C}_{37}\text{H}_{40}\text{N}_5\text{O}_4^+$  ( $[\text{M}+\text{H}^+]$ ) = 618.3075, Found 618.3070.

**Dimethyl (2*S*,10*bS*,*E*)-3-(*tert*-butylimino)-2-phenyl-2,3-dihydropyrrolo[2,1-*a*]isoquinoline-1,1(10*bH*)-dicarboxylate (8a)**

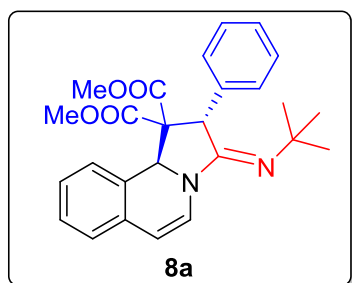

White solid; m.p.  $134-138\text{ }^\circ\text{C}$ ; 85% yield, 96.5:3.5 e.r.;  $[\alpha]_D^{25} = +213.6$  ( $c = 0.55$  in  $\text{CH}_2\text{Cl}_2$ ).

**HPLC** DAICEL CHIRALCEL IA, *n*-hexane/2-propanol = 90/10, flow rate = 1.0

mL/min,  $\lambda = 350$  nm,  $t_R$  (major) = 4.14 min,  $t_R$  (minor) = 4.76 min.

**IR** (neat): 2963, 1738, 1672, 1630, 1450, 1352, 1304, 1267, 1211, 1072, 775 and 709  $\text{cm}^{-1}$ .

**$^1\text{H}$  NMR** (400 MHz,  $\text{CDCl}_3$ )  $\delta = 7.33 - 7.27$  (m, 3H),  $7.23 - 7.22$  (m, 1),  $7.20 - 7.13$  (m, 3H),  $7.12 - 7.06$  (m, 1H),  $7.01 - 6.95$  (m, 1H),  $6.94 - 6.89$  (m, 1H),  $5.96$  (s, 1H),  $5.63$  (d,  $J = 7.6$  Hz, 1H),  $4.68$  (s, 1H),  $3.53$  (d,  $J = 5.2$  Hz, 6H),  $1.08$  (s, 9H).

**$^{13}\text{C}\{^1\text{H}\}$  NMR** (101 MHz,  $\text{CDCl}_3$ )  $\delta = 169.3, 168.3, 151.3, 135.0, 133.6, 128.8, 128.4, 128.0, 127.2, 126.8, 125.6, 124.8, 124.6, 105.7, 67.1, 59.0, 53.7, 53.2, 52.7, 52.5, 31.7$ .

**HRMS** (ESI-FT) calcd for  $\text{C}_{26}\text{H}_{29}\text{N}_2\text{O}_4^+$  ( $[\text{M}+\text{H}^+]$ ) = 433.2122, Found 433.2120.

Chiral HPLC spectrum **8a**:

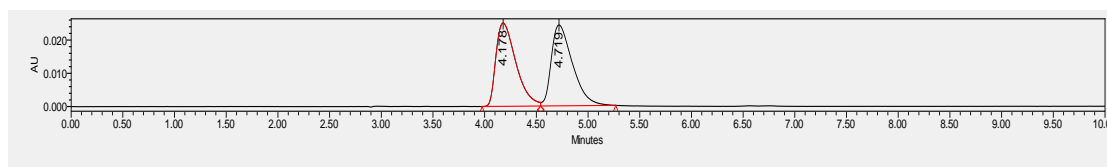

|   | Retention Time | Area   | % Area |
|---|----------------|--------|--------|
| 1 | 4.178          | 336377 | 49.25  |
| 2 | 4.719          | 346669 | 50.75  |

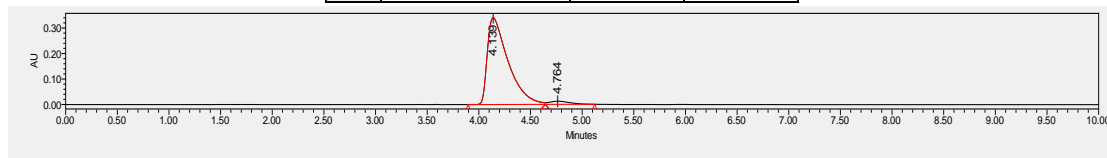

|   | Retention Time | Area    | % Area |
|---|----------------|---------|--------|
| 1 | 4.139          | 4743021 | 96.49  |
| 2 | 4.764          | 172367  | 3.51   |

**Diethyl (2*S*,10*bS*,*E*)-3-(tert-butylimino)-2-phenyl-2,3-dihydropyrrolo[2,1-*a*]isoquinoline-**

**1,1(10*bH*)-dicarboxylate (**8b**)**

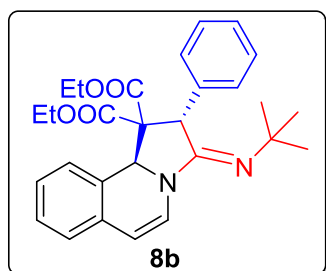

Pale yellow oil; 86% yield, 94.5:5.5 e.r.;  $[\alpha]_{\text{D}}^{25} = +115.16$  ( $c = 0.49$  in  $\text{CH}_2\text{Cl}_2$ ).

**HPLC** DAICEL CHIRALCEL ODH, *n*-hexane/2-propanol = 90/10, flow rate = 1.0 mL/min,  $\lambda = 350$  nm,  $t_R$  (major) = 3.58 min,  $t_R$  (minor) = 3.93 min.

**IR** (neat): 2972, 2930, 1736, 1672, 1630, 1458, 1406, 1304, 1263, 1204, 1070, 773 and 708  $\text{cm}^{-1}$ .

**$^1\text{H}$  NMR** (400 MHz,  $\text{CDCl}_3$ )  $\delta = 7.31 - 7.25$  (m, 3H), 7.24 - 7.21 (m, 2H), 7.20 - 7.16 (m, 2H), 7.11 - 7.05 (m, 1H), 7.00 - 6.94 (m, 1H), 6.92 - 6.87 (m, 1H), 6.00 (s, 1H), 5.60 (d,  $J = 7.8$  Hz, 1H), 4.68 (s, 1H), 4.10 - 3.83 (m, 4H), 1.15 (t,  $J = 7.2$  Hz, 3H), 1.08 (s, 9H), 0.95 (t,  $J = 7.2$  Hz, 3H).

**$^{13}\text{C}\{^1\text{H}\}$  NMR** (101 MHz,  $\text{CDCl}_3$ )  $\delta = 168.9, 167.9, 151.4, 135.1, 133.6, 128.8, 128.3, 128.0, 127.4, 127.3, 125.4, 124.9, 124.5, 105.2, 66.9, 62.0, 61.7, 59.0, 53.7, 53.0, 31.8, 13.9, 13.8$ .

**HRMS** (ESI-FT) calcd for  $\text{C}_{28}\text{H}_{33}\text{N}_2\text{O}_4^+$  ( $[\text{M}+\text{H}^+]$ ) = 461.2435, Found 461.2433.

Chiral HPLC spectrum **8b**:

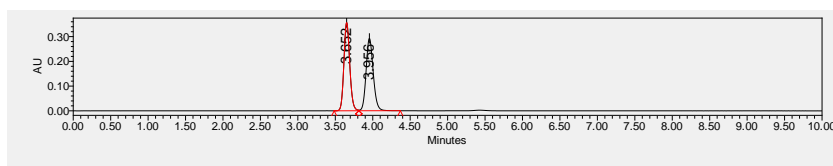

|   | Retention Time | Area    | % Area |
|---|----------------|---------|--------|
| 1 | 3.652          | 1931974 | 49.95  |
| 2 | 3.956          | 1936019 | 50.05  |

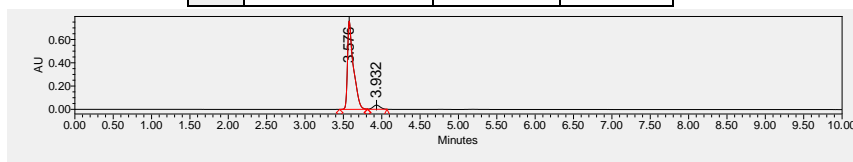

|   | Retention Time | Area    | % Area |
|---|----------------|---------|--------|
| 1 | 3.576          | 4040615 | 94.56  |
| 2 | 3.932          | 232508  | 5.44   |

**Dimethyl (2*S*,10*bS*,*E*)-2-(4-bromophenyl)-3-(*tert*-butylimino)-2,3-dihydropyrrolo[2,1-*a*]isoquinoline-1,1(10*bH*)-dicarboxylate (8c)**

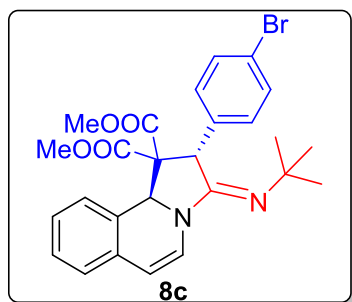

Pale yellow oil; 79% yield, 95:5 e.r.;  $[\alpha]_D^{25} = +98.28$  ( $c = 0.35$  in  $\text{CH}_2\text{Cl}_2$ ).

**HPLC** DAICEL CHIRALCEL IA, *n*-hexane/2-propanol = 90/10, flow rate = 1.0 mL/min,  $\lambda = 350$  nm,  $t_R$  (major) = 4.19 min,  $t_R$  (minor) = 4.86 min.

**IR** (neat): 2965, 2858, 1738, 1672, 1630, 1449, 1406, 1435, 1271, 1211, 1072, 943, 773 and 735  $\text{cm}^{-1}$ .

**$^1\text{H}$  NMR** (400 MHz,  $\text{CDCl}_3$ )  $\delta = 7.47 - 7.41$  (m, 2H), 7.23 - 7.17 (m, 2H), 7.13 - 7.08 (m, 1H), 7.06 - 7.03 (m, 2H), 7.02 - 6.97 (m, 1H), 6.95 - 6.90 (m, 1H), 5.90 (s, 1H), 5.64 (d,  $J = 7.8$  Hz, 1H), 4.63 (s, 1H), 3.57 (s, 3H), 3.53 (s, 3H), 1.08 (s, 9H).

**$^{13}\text{C}\{^1\text{H}\}$  NMR** (101 MHz,  $\text{CDCl}_3$ )  $\delta = 169.1, 168.1, 150.7, 134.2, 133.5, 132.1, 128.2, 127.0, 126.8, 125.7, 124.7, 124.6, 122.5, 105.9, 66.9, 58.9, 53.8, 52.8, 52.6, 52.5, 31.8$ .

**HRMS** (ESI-FT) calcd for  $\text{C}_{26}\text{H}_{28}^{79}\text{BrN}_2\text{O}_4^+$  ( $[\text{M}+\text{H}^+]$ ) = 511.1227, Found 511.1228,  $\text{C}_{26}\text{H}_{28}^{81}\text{BrN}_2\text{O}_4^+$  ( $[\text{M}+\text{H}^+]$ ) = 513.1206, Found 513.1208.

Chiral HPLC spectrum **8c**:

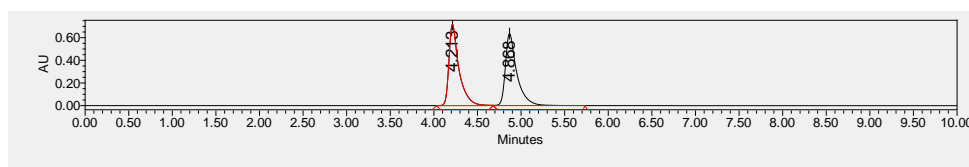

|   | Retention Time | Area    | % Area |
|---|----------------|---------|--------|
| 1 | 4.213          | 5760293 | 49.84  |
| 2 | 4.868          | 5797686 | 50.16  |

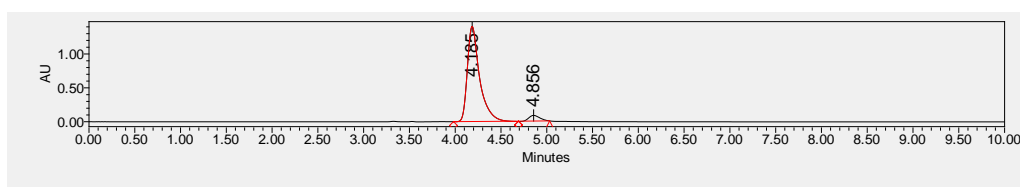

|   | Retention Time | Area     | % Area |
|---|----------------|----------|--------|
| 1 | 4.185          | 12992239 | 94.90  |
| 2 | 4.856          | 697892   | 5.10   |

**Dmethyl (2*S*,10*bS*,*E*)-3-(tert-butylimino)-2-(4-chlorophenyl)-2,3-dihydropyrrolo[2,1-*a*]isoquinoline-1,1(10*bH*)-dicarboxylate (8d)**

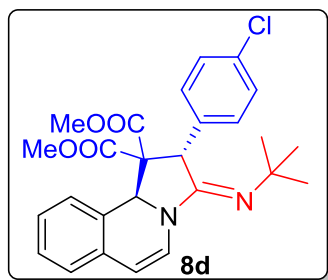

Pale yellow oil; 90% yield, 95:5 e.r.;  $[\alpha]_D^{25} = +154.03$  ( $c = 0.37$  in  $\text{CH}_2\text{Cl}_2$ ).

**HPLC** DAICEL CHIRALCEL IA, *n*-hexane/2-propanol = 90/10, flow rate = 1.0 mL/min,  $\lambda = 350$  nm,  $t_R$  (major) = 4.16 min,  $t_R$  (minor) = 4.90 min.

**IR** (neat): 2965, 2864, 1738, 1672, 1630, 1489, 1449, 1406, 1354, 1306, 1269, 1211, 1084, 947, 773 and 731  $\text{cm}^{-1}$ .

**$^1\text{H}$  NMR** (400 MHz,  $\text{CDCl}_3$ )  $\delta = 7.32 - 7.27$  (m, 2H), 7.22 - 7.17 (m, 2H), 7.14 - 7.08 (m, 3H), 7.02 - 6.96 (m, 1H), 6.94 - 6.90 (m, 1H), 5.90 (s, 1H), 5.64 (d,  $J = 7.8$  Hz, 1H), 4.65 (s, 1H), 3.57 (s, 3H), 3.54 (s, 3H), 1.08 (s, 9H).

**$^{13}\text{C}\{^1\text{H}\}$  NMR** (101 MHz,  $\text{CDCl}_3$ )  $\delta = 169.1, 168.1, 150.7, 134.4, 133.7, 133.5, 130.6, 129.1, 128.2, 127.0, 126.8, 125.7, 124.7, 124.6, 105.9, 66.9, 58.9, 53.7, 52.8, 52.6, 52.4, 31.8$ .

**HRMS** (ESI-FT) calcd for  $\text{C}_{26}\text{H}_{28}^{35}\text{ClN}_2\text{O}_4^+$  ( $[\text{M}+\text{H}^+]$ ) = 467.1732, Found 467.1729,  $\text{C}_{26}\text{H}_{28}^{37}\text{ClN}_2\text{O}_4^+$  ( $[\text{M}+\text{H}^+]$ ) = 469.1703, Found 469.1724.

**Chiral HPLC spectrum 8d:**

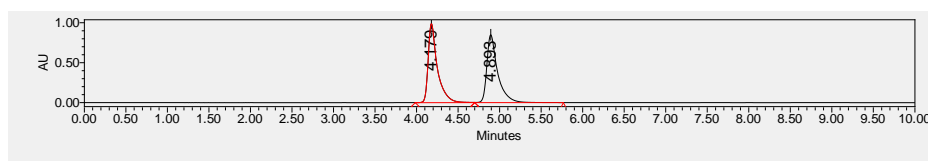

|   | Retention Time | Area    | % Area |
|---|----------------|---------|--------|
| 1 | 4.179          | 7631806 | 49.84  |
| 2 | 4.893          | 7679352 | 50.16  |

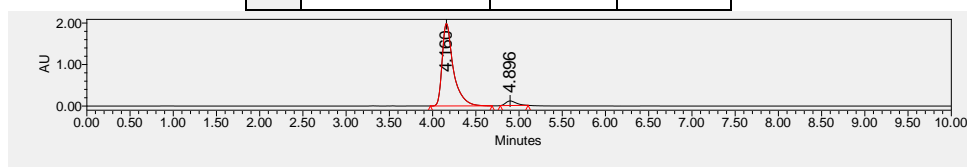

|   | Retention Time | Area     | % Area |
|---|----------------|----------|--------|
| 1 | 4.160          | 17832631 | 95.08  |

|   |       |        |      |
|---|-------|--------|------|
| 2 | 4.896 | 923498 | 4.92 |
|---|-------|--------|------|

**Dimethyl (2*S*,10*bS*,*E*)-3-(tert-butylimino)-2-(3-chlorophenyl)-2,3-dihydropyrrolo[2,1-*a*]isoquinoline-1,1(10*bH*)-dicarboxylate (8e)**

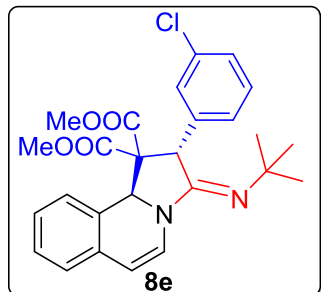

Pale yellow oil; 88% yield, 92:8 e.r.;  $[\alpha]_D^{25} = +159.44$  ( $c = 0.60$  in  $\text{CH}_2\text{Cl}_2$ ).

**HPLC** DAICEL CHIRALCEL IA, *n*-hexane/2-propanol = 90/10, flow rate = 1.0 mL/min,  $\lambda = 350$  nm,  $t_R$  (major) = 3.87 min,  $t_R$  (minor) = 4.94 min.

**IR** (neat): 2965, 1740, 1672, 1630, 1406, 1354, 1306, 1271, 1209, 1072, 951, 891, 775 and 706  $\text{cm}^{-1}$ .

**$^1\text{H}$  NMR** (400 MHz,  $\text{CDCl}_3$ )  $\delta = 7.28 - 7.25$  (m, 2H), 7.24 - 7.16 (m, 3H), 7.13 - 7.04 (m, 2H), 7.02 - 7.96 (m, 1H), 6.95 - 6.90 (m, 1H), 5.91 (s, 1H), 5.64 (d,  $J = 7.8\text{Hz}$ , 1H), 4.64 (s, 1H), 3.60 (s, 3H), 3.54 (s, 3H), 1.09 (s, 9H).

**$^{13}\text{C}\{^1\text{H}\}$  NMR** (101 MHz,  $\text{CDCl}_3$ )  $\delta = 169.0, 168.1, 150.5, 137.2, 134.7, 133.5, 130.2, 128.6, 128.2, 126.9, 126.8, 125.7, 124.7, 124.6, 105.9, 58.9, 53.8, 52.8, 52.6, 31.8$ .

**HRMS** (ESI-FT) calcd for  $\text{C}_{26}\text{H}_{28}^{35}\text{ClN}_2\text{O}_4^+$  ( $[\text{M}+\text{H}^+]$ ) = 467.1732, Found 467.1738,  $\text{C}_{26}\text{H}_{28}^{37}\text{ClN}_2\text{O}_4^+$  ( $[\text{M}+\text{H}^+]$ ) = 469.1703, Found 469.1712.

Chiral HPLC spectrum **8e**:

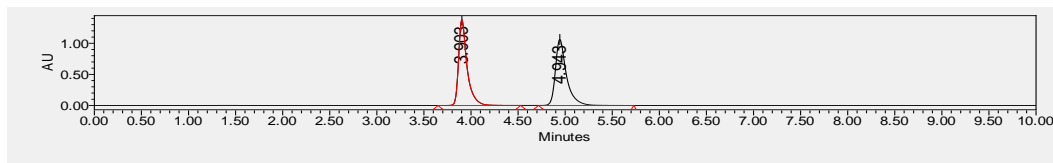

|   | Retention Time | Area    | % Area |
|---|----------------|---------|--------|
| 1 | 3.903          | 8636808 | 49.96  |
| 2 | 4.943          | 8650836 | 50.04  |

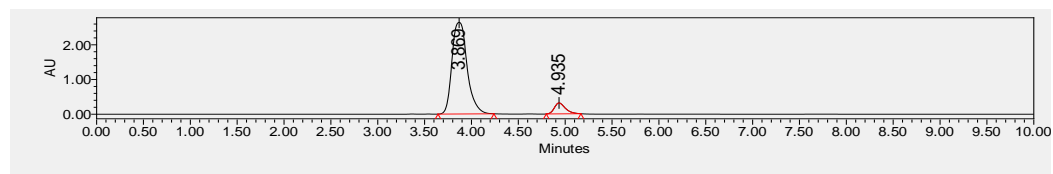



|   | Retention Time | Area     | % Area |
|---|----------------|----------|--------|
| 1 | 3.869          | 29714217 | 92.03  |
| 2 | 4.935          | 2574573  | 7.97   |

**Dimethyl (2*S*,10*bS*,*E*)-3-(*tert*-butylimino)-2-(*p*-tolyl)-2,3-dihydropyrrolo[2,1-*a*]isoquinoline-1,1(10*bH*)-dicarboxylate (8f)**

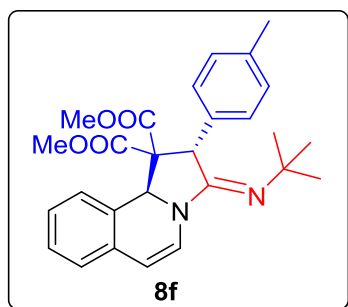

Pale yellow oil; 83% yield, 95.5:4.5 e.r.;  $[\alpha]_D^{25} = +183.11$  ( $c = 0.60$  in  $\text{CH}_2\text{Cl}_2$ ).

**HPLC** DAICEL CHIRALCEL IA, *n*-hexane/2-propanol = 90/10, flow rate = 1.0 mL/min,  $\lambda = 350$  nm,  $t_R$  (major) = 4.21 min,  $t_R$  (minor) = 4.89 min.

**IR** (neat): 2963, 1738, 1672, 1627, 1449, 1406, 1352, 1304, 1265, 1207, 1072, 943, 773 and 727  $\text{cm}^{-1}$ .

**$^1\text{H}$  NMR** (400 MHz,  $\text{CDCl}_3$ )  $\delta = 7.25 - 7.18$  (m, 2H), 7.12 - 7.07 (m, 3H), 7.06 - 7.02 (m, 2H), 7.00 - 7.96 (m, 1H), 6.94 - 7.89 (m, 1H), 5.94 (s, 1H), 5.63 (d,  $J = 7.8$  Hz, 1H), 4.64 (s, 1H), 3.54 (d,  $J = 7.6$  Hz, 6H), 2.31 (s, 3H), 1.08 (s, 9H).

**$^{13}\text{C}\{^1\text{H}\}$  NMR** (101 MHz,  $\text{CDCl}_3$ )  $\delta = 169.4, 168.3, 151.5, 138.1, 133.6, 131.8, 129.5, 128.0, 127.3, 126.8, 125.6, 124.8, 124.6, 105.6, 67.1, 59.0, 53.6, 52.8, 52.7, 52.4, 31.7, 21.3$ .

**HRMS** (ESI-FT) calcd for  $\text{C}_{27}\text{H}_{31}\text{N}_2\text{O}_4^+$  ( $[\text{M}+\text{H}^+]$ ) = 447.2278, Found 447.2282.

Chiral HPLC spectrum **8f**:

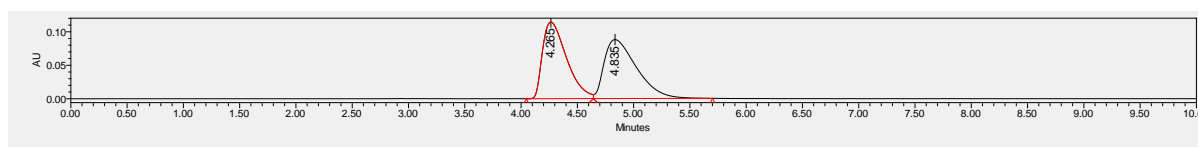

|   | Retention Time | Area    | % Area |
|---|----------------|---------|--------|
| 1 | 4.265          | 1698273 | 49.16  |
| 2 | 4.835          | 1756495 | 50.84  |

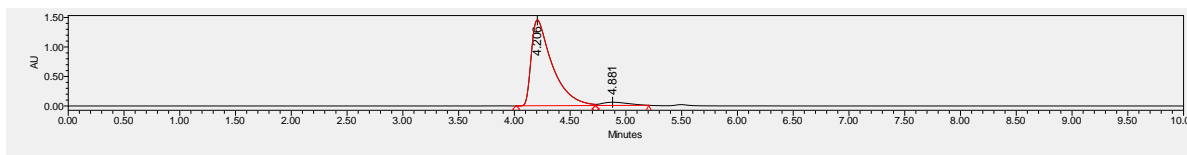

|   | Retention Time | Area     | % Area |
|---|----------------|----------|--------|
| 1 | 4.206          | 18951347 | 95.53  |
| 2 | 4.881          | 886515   | 4.47   |

**Dimethyl (2*S*,10*bS*,*E*)-3-(tert-butylimino)-2-(*m*-tolyl)-2,3-dihydropyrrolo[2,1-*a*]isoquinoline-1,1(10*bH*)-dicarboxylate (**8g**)**

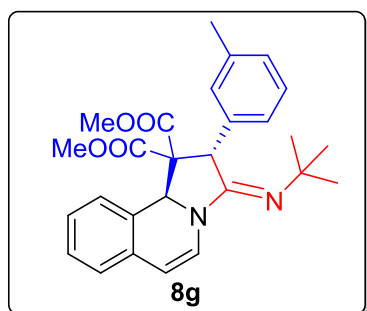

Pale yellow oil; 91% yield, 95:5 e.r.;  $[\alpha]_D^{25} = +175.36$  ( $c = 0.82$  in  $\text{CH}_2\text{Cl}_2$ ).

**HPLC** DAICEL CHIRALCEL IA, *n*-hexane/2-propanol = 90/10, flow rate = 1.0 mL/min,  $\lambda = 350$  nm,  $t_R$  (major) = 3.77 min,  $t_R$  (minor) = 4.21 min.

**IR** (neat): 2963, 1740, 1672, 1630, 1450, 1408, 1352, 1306, 1256, 1207, 1072, 957, 775 and 729  $\text{cm}^{-1}$ .

**$^1\text{H}$  NMR** (400 MHz,  $\text{CDCl}_3$ )  $\delta = 7.26 - 7.23$  (m, 1H), 7.21 - 7.16 (m, 2H), 7.12 - 7.06 (m, 2H), 7.01 - 6.89 (m, 4H), 5.96 (s, 1H), 5.63 (d,  $J = 7.8$  Hz, 1H), 4.65 (s, 1H), 3.54 (d,  $J = 2.4$  Hz, 6H), 2.32 (s, 3H), 1.09 (s, 9H).

**$^{13}\text{C}\{^1\text{H}\}$  NMR** (101 MHz,  $\text{CDCl}_3$ )  $\delta = 169.3, 168.3, 151.5, 138.4, 134.8, 133.6, 129.1, 128.6, 128.0, 127.2, 126.9, 125.6, 124.8, 124.6, 105.5, 67.1, 59.0, 53.6, 53.1, 52.7, 52.4, 31.7, 21.6$ .

**HRMS** (ESI-FT) calcd for  $\text{C}_{27}\text{H}_{31}\text{N}_2\text{O}_4^+$  ( $[\text{M}+\text{H}^+]$ ) = 447.2278, Found 447.2282.

Chiral HPLC spectrum **8g**:

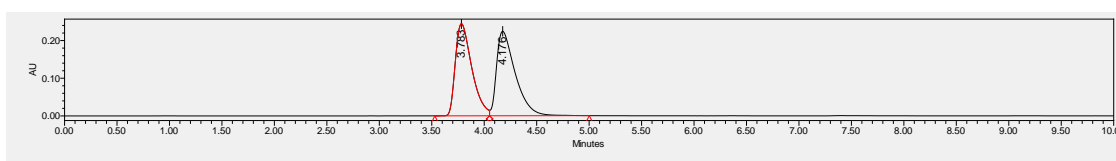

|   | Retention Time | Area    | % Area |
|---|----------------|---------|--------|
| 1 | 3.783          | 2661242 | 48.98  |
| 2 | 4.176          | 2772307 | 51.02  |

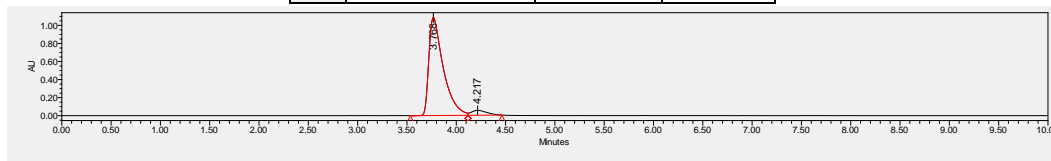

|   | Retention Time | Area     | % Area |
|---|----------------|----------|--------|
| 1 | 3.768          | 10993248 | 94.93  |
| 2 | 4.217          | 586895   | 5.07   |

**Dimethyl (2*S*,10*bS*,*E*)-3-(*tert*-butylimino)-2-(naphthalen-2-yl)-2,3-dihydropyrrolo[2,1-*a*]isoquinoline-1,1(10*bH*)-dicarboxylate (**8h**)**

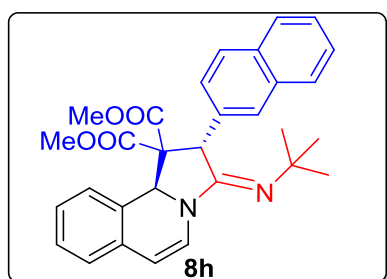

White solid; m.p. 76-78 °C; 93% yield, 97:3 e.r.;  $[\alpha]_D^{25} = +88.95$  ( $c = 0.38$  in  $\text{CH}_2\text{Cl}_2$ ).

**HPLC** DAICEL CHIRALCEL ODH, *n*-hexane/2-propanol = 90/10, flow rate = 1.0 mL/min,  $\lambda = 350$  nm,  $t_R$  (major) = 4.18 min,  $t_R$  (minor) = 5.23 min.

**IR** (neat): 2965, 1738, 1672, 1630, 1449, 1406, 1354, 1306, 1263, 1209, 1072, 901, 775 and 743  $\text{cm}^{-1}$ .

**$^1\text{H}$  NMR** (400 MHz,  $\text{CDCl}_3$ )  $\delta = 7.85 - 7.78$  (m, 3H), 7.68 – 7.63 (m, 1H), 7.52 – 7.46 (m, 2H), 7.34 – 7.27 (m, 2H), 7.23 – 7.18 (m, 1H), 7.14 – 7.09 (m, 1H), 7.02 – 6.92 (m, 2H), 6.08 (s, 1H), 5.69 (d,  $J = 7.8$  Hz, 1H), 4.87 (s, 1H), 3.57 (s, 3H), 3.49 (s, 3H), 1.09 (s, 9H).

**$^{13}\text{C}\{^1\text{H}\}$  NMR** (101 MHz,  $\text{CDCl}_3$ )  $\delta = 169.3, 168.2, 151.3, 133.6, 133.4, 133.0, 132.5, 128.6, 128.1, 127.8, 127.2, 126.9, 126.6, 125.6, 124.8, 124.6, 105.7, 67.3, 59.1, 53.7, 53.2, 52.8, 52.5, 31.8$ .

**HRMS** (ESI-FT) calcd for  $\text{C}_{30}\text{H}_{31}\text{N}_2\text{O}_4^+$  ( $[\text{M}+\text{H}^+]$ ) = 483.2278, Found 483.2277.

Chiral HPLC spectrum **8h**:

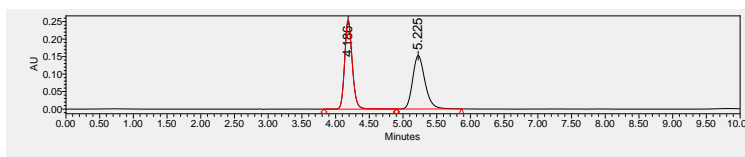

|   | Retention Time | Area    | % Area |
|---|----------------|---------|--------|
| 1 | 4.186          | 1987417 | 50.65  |
| 2 | 5.225          | 1936199 | 49.35  |

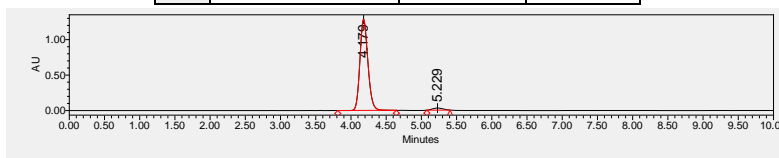

|   | Retention Time | Area     | % Area |
|---|----------------|----------|--------|
| 1 | 4.179          | 10091286 | 97.08  |
| 2 | 5.229          | 303935   | 2.92   |

**Dimethyl (2*S*,10*bS*,*E*)-3-(*tert*-butylimino)-7-nitro-2-phenyl-2,3-dihydropyrrolo[2,1-*a*]isoquinoline-1,1(10*bH*)-dicarboxylate (**8i**)**

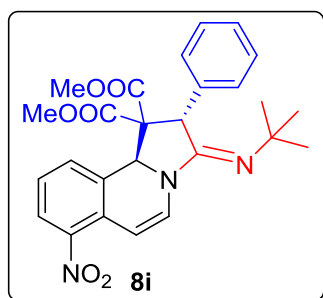

Orange red oil; 53% yield, 97:3 e.r.;  $[\alpha]_D^{25} = +86.19$  ( $c = 0.42$  in  $\text{CH}_2\text{Cl}_2$ ).

**HPLC** DAICEL CHIRALCEL IA, *n*-hexane/2-propanol = 90/10, flow rate = 1.0 mL/min,  $\lambda = 350$  nm,  $t_R$  (major) = 4.63 min,  $t_R$  (minor) = 6.64 min.

**IR** (neat): 2963, 2926, 2858, 1740, 1682, 1612, 1524, 1462, 1402, 1350, 1269, 1213, 1072 and  $763\text{ cm}^{-1}$ .

**$^1\text{H}$  NMR** (400 MHz,  $\text{CDCl}_3$ )  $\delta = 7.87 - 7.81$  (m, 1H),  $7.60 - 7.52$  (m, 2H),  $7.48 - 7.41$  (m, 3H),  $7.28 - 7.23$  (m, 2H),  $7.16$  (t,  $J = 8.0$  Hz, 1H),  $6.44$  (d,  $J = 8.0$ , 1H),  $6.07$  (s, 1H),  $4.82$  (s, 1H),  $3.73$  (s, 3H),  $3.68$  (s, 3H),  $1.20$  (s, 9H).

**$^{13}\text{C}\{^1\text{H}\}$  NMR** (101 MHz,  $\text{CDCl}_3$ )  $\delta = 168.7, 168.0, 149.8, 144.6, 134.5, 131.3, 129.5, 129.3, 129.1, 129.0, 128.7, 124.9, 124.6, 98.5, 67.0, 58.6, 54.1, 53.1, 53.0, 52.7, 31.5$ .

**HRMS** (ESI-FT) calcd for  $\text{C}_{26}\text{H}_{28}\text{N}_3\text{O}_6^+$  ( $[\text{M}+\text{H}^+]$ ) = 478.1973, Found 478.1964.

Chiral HPLC spectrum **8i**:

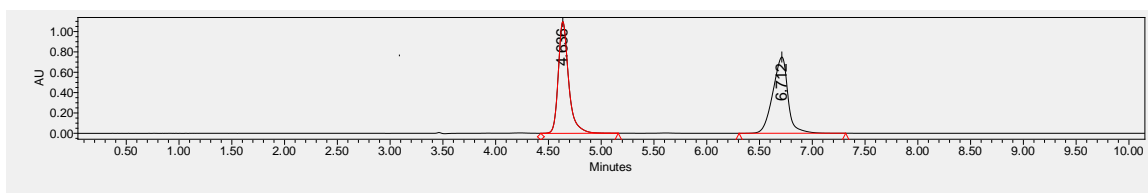

|   | Retention Time | Area    | % Area |
|---|----------------|---------|--------|
| 1 | 4.636          | 7473300 | 50.08  |
| 2 | 6.712          | 7448875 | 49.92  |

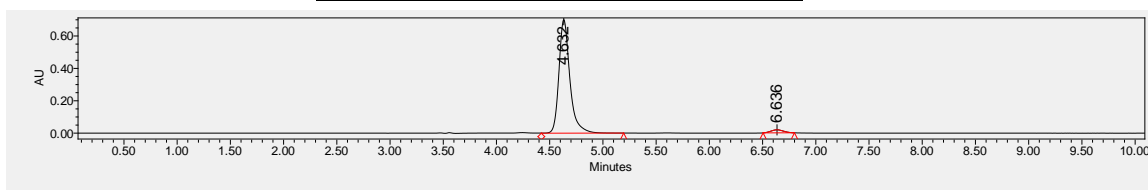

|   | Retention Time | Area    | % Area |
|---|----------------|---------|--------|
| 1 | 4.632          | 5016304 | 97.04  |
| 2 | 6.636          | 153249  | 2.96   |

**Dimethyl (2*S*,10*bS*,*E*)-3-(*tert*-butylimino)-2-(4-methoxyphenyl)-7-nitro-2,3-dihydropyrrolo**

**[2,1-*a*]isoquinoline-1,1(10*bH*)-dicarboxylate (8*j*)**

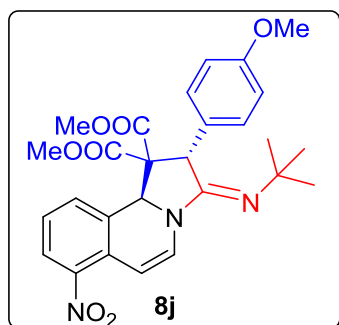

Orange red oil; 40% yield, 98:2 e.r.;  $[\alpha]_D^{25} = +32.24$  ( $c = 0.37$  in  $\text{CH}_2\text{Cl}_2$ ).

**HPLC** DAICEL CHIRALCEL IA, *n*-hexane/2-propanol = 90/10, flow rate = 1.0 mL/min,  $\lambda = 350$  nm,  $t_R$  (major) = 5.26 min,  $t_R$  (minor) = 10.72 min.

**IR** (neat): 2965, 1738, 1682, 1612, 1518, 1463, 1350, 1263, 1070, and 770  $\text{cm}^{-1}$ .

**$^1\text{H}$  NMR** (400 MHz,  $\text{CDCl}_3$ )  $\delta = 7.75 - 7.68$  (m, 1H), 7.47 – 7.38 (m, 2H), 7.07 – 6.98 (m, 3H), 6.87 – 6.80 (m, 2H), 6.30 (d,  $J = 8.0$  Hz, 1H), 5.91 (s, 1H), 4.64 (s, 1H), 3.79 (s, 3H), 3.59 (d,  $J = 1.2$  Hz, 6H), 1.08 (s, 9H).

**$^{13}\text{C}\{^1\text{H}\}$  NMR** (101 MHz,  $\text{CDCl}_3$ )  $\delta = 168.8, 168.2, 159.7, 150.0, 144.6, 131.3, 130.2, 129.6, 129.3, 129.2, 126.1, 124.9, 124.6, 114.4, 98.5, 67.1, 58.6, 55.3, 54.0, 53.1, 52.7, 52.3, 31.5$ .

HRMS (ESI-FT) calcd for C<sub>27</sub>H<sub>30</sub>N<sub>3</sub>O<sub>7</sub><sup>+</sup> ([M+H<sup>+</sup>]) = 508.2078, Found 508.2081.

Chiral HPLC spectrum **8j**:

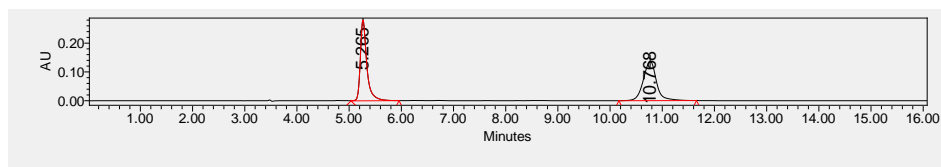

|   | Retention Time | Area    | % Area |
|---|----------------|---------|--------|
| 1 | 5.265          | 2405177 | 50.14  |
| 2 | 10.768         | 2391489 | 49.86  |

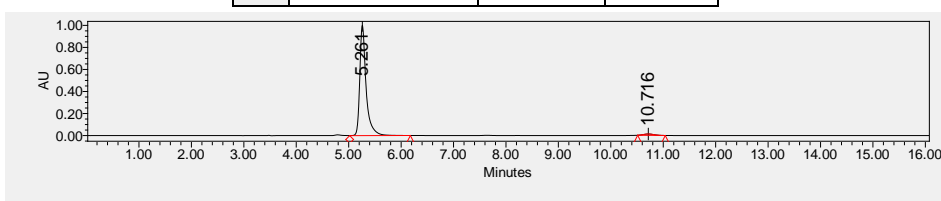

|   | Retention Time | Area    | % Area |
|---|----------------|---------|--------|
| 1 | 5.261          | 8365420 | 98.00  |
| 2 | 10.716         | 170581  | 2.00   |

Dimethyl (2*S*,10*bS*,*E*)-3-(*tert*-butylimino)-2-(4-cyanophenyl)-7-nitro-2,3-dihydropyrrolo

[2,1-*a*]isoquinoline-1,1(10*bH*)-dicarboxylate (**8k**)

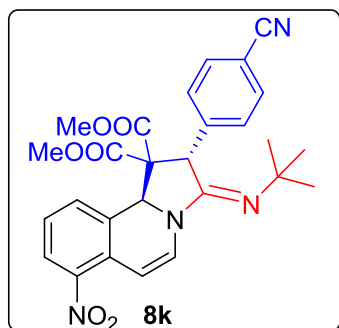

Orange red oil; 60% yield, 96:4 e.r.; [ $\alpha$ ]<sub>D</sub><sup>25</sup> = +13.54 (*c* = 0.58 in CH<sub>2</sub>Cl<sub>2</sub>).

HPLC DAICEL CHIRALCEL IA, *n*-hexane/2-propanol = 70/30, flow rate = 1.0 mL/min,  $\lambda$  = 350 nm, *t<sub>R</sub>* (major) = 4.35 min, *t<sub>R</sub>* (minor) = 10.10 min.

IR (neat): 2967, 2232, 1740, 1682, 1612, 1522, 1462, 1404, 1350, 1271, 1213, 1070, 768 and 733 cm<sup>-1</sup>.

<sup>1</sup>H NMR (400 MHz, CDCl<sub>3</sub>)  $\delta$  = 7.75 – 7.70 (m, 1H), 7.67 – 7.61 (m, 2H), 7.44 – 7.37 (m, 2H), 7.29 (d, *J* = 8.2 Hz, 2H), 7.06 (t, *J* = 8.0 Hz, 1H), 6.32 (d, *J* = 8.0 Hz, 1H), 5.88 (s, 1H), 4.74 (s, 1H), 3.60 (d, *J* = 5.8 Hz, 6H), 1.06 (s, 9H).

<sup>13</sup>C{<sup>1</sup>H} NMR (101 MHz, CDCl<sub>3</sub>)  $\delta$  = 168.2, 167.6, 148.4, 144.8, 140.3, 132.7, 131.3,

129.9, 129.1, 128.9, 128.8, 125.2, 124.8, 118.1, 112.8, 99.1, 66.8, 58.5, 58.5, 54.2, 53.3, 53.0, 52.6, 31.5.

**HRMS** (ESI-FT) calcd for  $C_{27}H_{27}N_4O_6^+$  ( $[M+H]^+$ ) = 503.1925, Found 503.1921.

Chiral HPLC spectrum **8**:

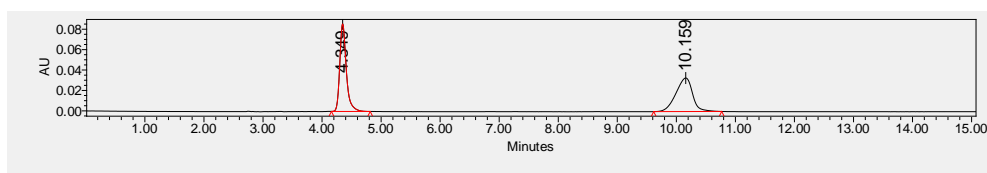

|   | Retention Time | Area   | % Area |
|---|----------------|--------|--------|
| 1 | 4.349          | 658122 | 50.49  |
| 2 | 10.159         | 645383 | 49.51  |

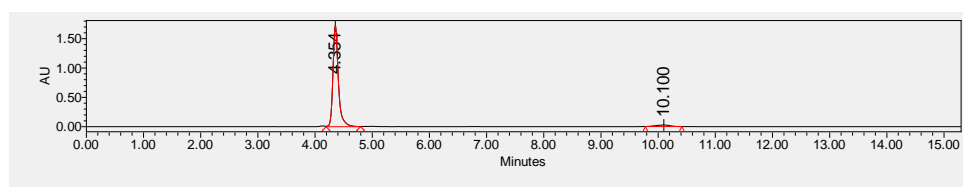

|   | Retention Time | Area     | % Area |
|---|----------------|----------|--------|
| 1 | 4.354          | 11361458 | 96.23  |
| 2 | 10.100         | 444742   | 3.77   |

**Dimethyl (2*S*,10*bS*,*E*)-2-(4-bromophenyl)-3-(tert-butylimino)-7-nitro-2,3-dihydropyrrolo [2,1-*a*]isoquinoline-1,1(10*bH*)-dicarboxylate (**8I**)**

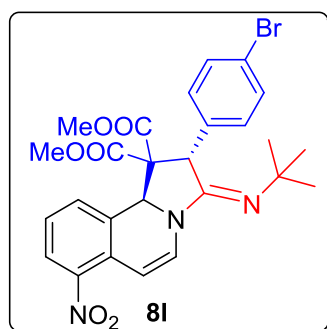

Orange red oil; 72% yield, 97.5:2.5 e.r.;  $[\alpha]_D^{25} = +17.01$  ( $c = 0.78$  in  $CH_2Cl_2$ ).

**HPLC** DAICEL CHIRALCEL IA, *n*-hexane/2-propanol = 90/10, flow rate = 1.0 mL/min,  $\lambda = 350$  nm,  $t_R$  (major) = 4.91 min,  $t_R$  (minor) = 7.66 min.

**IR** (neat): 2965, 1738, 1682, 1612, 1523, 1350, 1273, 1213, 1072 and 766  $cm^{-1}$ .

**$^1H$  NMR** (400 MHz,  $CDCl_3$ )  $\delta = 7.74 - 7.70$  (m, 1H), 7.49 - 7.38 (m, 4H), 7.08 - 6.98 (m, 3H), 6.31 (d,  $J = 8.4$ , 1H), 5.88 (s, 1H), 4.65 (s, 1H), 3.60 (d,  $J = 2.0$  Hz, 6H),

1.07 (s, 9H).

$^{13}\text{C}\{^1\text{H}\}$  NMR (101 MHz,  $\text{CDCl}_3$ )  $\delta$  = 168.5, 167.9, 149.1, 144.7, 133.7, 132.3, 131.3, 130.7, 129.3, 129.1, 129.0, 125.0, 124.7, 122.9, 98.8, 66.8, 58.5, 54.1, 53.2, 52.9, 52.3, 31.5.

HRMS (ESI-FT) calcd for  $\text{C}_{26}\text{H}_{27}^{79}\text{BrN}_3\text{O}_6^+$  ( $[\text{M}+\text{H}^+]$ ) = 556.1078, Found 556.1083,  $\text{C}_{26}\text{H}_{27}^{81}\text{BrN}_3\text{O}_6^+$  ( $[\text{M}+\text{H}^+]$ ) = 558.1057, Found 558.1062.

Chiral HPLC spectrum **8l**:

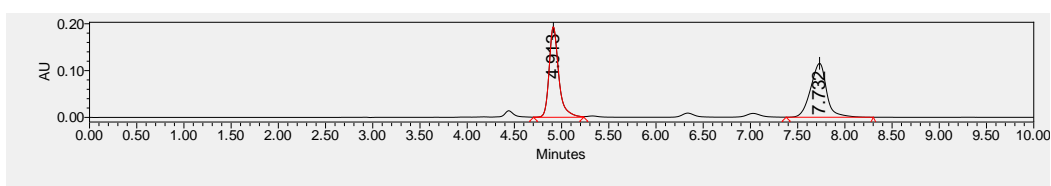

|   | Retention Time | Area    | % Area |
|---|----------------|---------|--------|
| 1 | 4.913          | 1363259 | 50.26  |
| 2 | 7.732          | 1348935 | 49.74  |

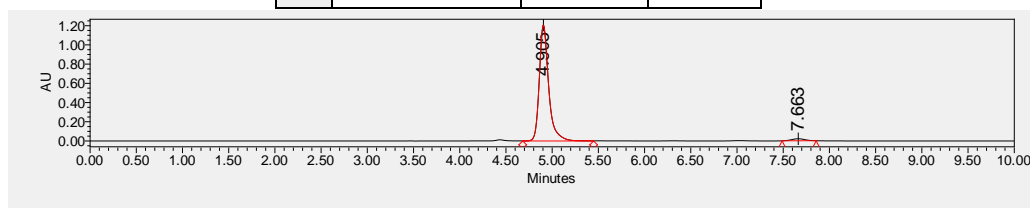

|   | Retention Time | Area    | % Area |
|---|----------------|---------|--------|
| 1 | 4.905          | 8482327 | 97.58  |
| 2 | 7.663          | 210429  | 2.42   |

**Dimethyl (2*S*,10*bS*,*E*)-3-(tert-butylimino)-2-(4-chlorophenyl)-7-nitro-2,3-dihydropyrrolo [2,1-*a*]isoquinoline-1,1(10*bH*)-dicarboxylate (**8m**)**

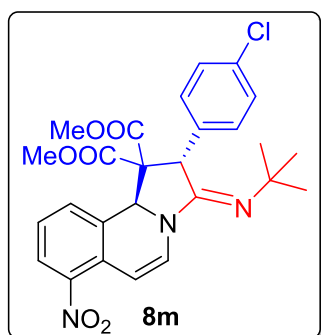

Orange red oil; 65% yield, 98:2 e.r.;  $[\alpha]_D^{25} = +29.03$  ( $c = 0.62$  in  $\text{CH}_2\text{Cl}_2$ ).

HPLC DAICEL CHIRALCEL IA,  $n$ -hexane/2-propanol = 90/10, flow rate = 1.0 mL/min,  $\lambda = 350$  nm,  $t_R$  (major) = 4.79 min,  $t_R$  (minor) = 7.77 min.



**IR** (neat): 2965, 1740, 1680, 1612, 1524, 1462, 1350, 1273, 1093, 766 and 733  $\text{cm}^{-1}$ .

**$^1\text{H}$  NMR** (400 MHz,  $\text{CDCl}_3$ )  $\delta$  = 7.75 – 7.68 (m, 1H), 7.45 – 7.38 (m, 2H), 7.33 – 7.29 (m, 2H), 7.12 – 7.00 (m, 3H), 6.31 (d,  $J$  = 8.0 Hz, 1H), 5.89 (s, 1H), 4.67 (s, 1H), 3.59 (s, 3H), 1.07 (s, 9H).

**$^{13}\text{C}\{^1\text{H}\}$  NMR** (101 MHz,  $\text{CDCl}_3$ )  $\delta$  = 168.5, 167.9, 149.2, 144.7, 134.7, 133.1, 131.3, 130.4, 129.3, 129.1, 129.0, 125.0, 124.7, 98.8, 66.9, 58.5, 54.1, 53.2, 52.9, 52.2, 31.5.

**HRMS** (ESI-FT) calcd for  $\text{C}_{26}\text{H}_{27}^{35}\text{ClN}_3\text{O}_6^+$  ( $[\text{M}+\text{H}^+]$ ) = 512.1583, Found 512.1285,  $\text{C}_{26}\text{H}_{27}^{37}\text{ClN}_3\text{O}_6^+$  ( $[\text{M}+\text{H}^+]$ ) = 514.1553, Found 514.1563.

Chiral HPLC spectrum **8m**:

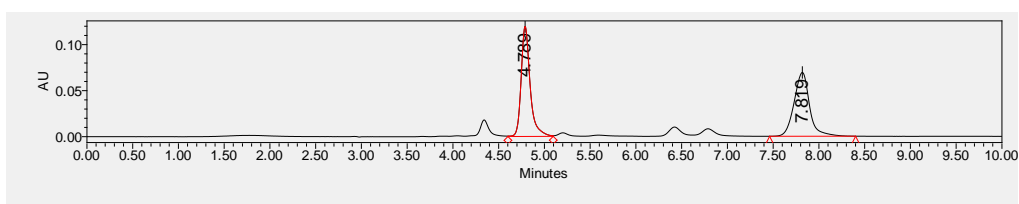

|   | Retention Time | Area   | % Area |
|---|----------------|--------|--------|
| 1 | 4.789          | 817491 | 50.17  |
| 2 | 7.819          | 811950 | 49.83  |

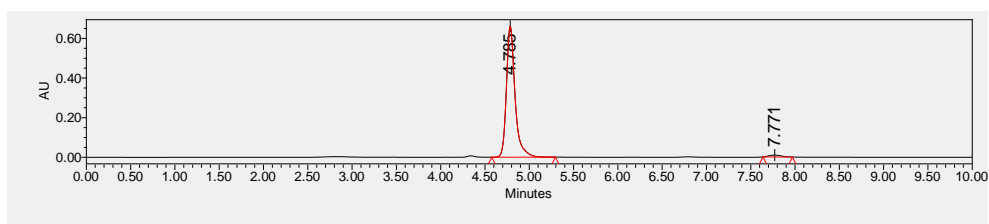

|   | Retention Time | Area    | % Area |
|---|----------------|---------|--------|
| 1 | 4.785          | 4478089 | 98.05  |
| 2 | 7.771          | 89286   | 1.95   |

**Dimethyl (2*S*,10*bS*,*E*)-3-(*tert*-butylimino)-2-(3-chlorophenyl)-7-nitro-2,3-dihydropyrrolo [2,1-*a*]isoquinoline-1,1(10*bH*)-dicarboxylate (**8n**)**

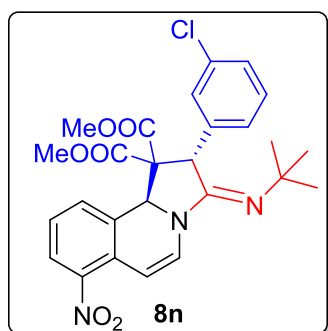

Orange red solid; m.p. 78-82 °C; 63% yield, 97:3 e.r.;  $[\alpha]_D^{25} = +89.41$  ( $c = 0.34$  in  $\text{CH}_2\text{Cl}_2$ ).

**HPLC** DAICEL CHIRALCEL IA, *n*-hexane/2-propanol = 90/10, flow rate = 1.0 mL/min,  $\lambda = 350$  nm,  $t_R$  (major) = 4.53 min,  $t_R$  (minor) = 7.56 min.

**IR** (neat): 2965, 1740, 1680, 1612, 1526, 1466, 1402, 1350, 1273, 1213, 770 and 735  $\text{cm}^{-1}$ .

**$^1\text{H}$  NMR** (400 MHz,  $\text{CDCl}_3$ )  $\delta = 7.75 - 7.68$  (m, 1H), 7.46 - 7.39 (m, 2H), 7.33 - 7.27 (m, 2H), 7.16 - 7.13 (m, 1H), 7.08 - 6.99 (m, 2H), 6.31 (d,  $J = 8.0$  Hz, 1H), 5.89 (s, 1H), 4.67 (s, 1H), 3.63 (s, 3H), 3.60 (s, 3H), 1.09 (s, 9H).

**$^{13}\text{C}\{^1\text{H}\}$  NMR** (101 MHz,  $\text{CDCl}_3$ )  $\delta = 168.4, 167.8, 149.0, 144.7, 136.6, 134.9, 131.4, 130.4, 129.3, 129.1, 129.0, 128.9, 125.0, 124.7, 98.7, 66.9, 58.6, 54.2, 53.2, 52.9, 52.4, 31.5$ .

**HRMS** (ESI-FT) calcd for  $\text{C}_{26}\text{H}_{27}^{35}\text{ClN}_3\text{O}_6^+$  ( $[\text{M}+\text{H}^+]$ ) = 512.1583, Found 512.1589,  $\text{C}_{26}\text{H}_{27}^{37}\text{ClN}_3\text{O}_6^+$  ( $[\text{M}+\text{H}^+]$ ) = 514.1553, Found 514.1561.

Chiral HPLC spectrum **8n**:

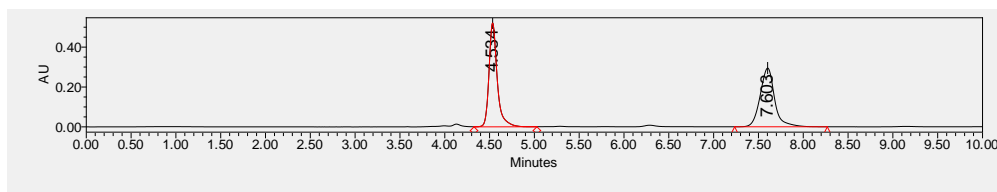

|   | Retention Time | Area    | % Area |
|---|----------------|---------|--------|
| 1 | 4.534          | 3329168 | 50.24  |
| 2 | 7.603          | 3296936 | 49.76  |

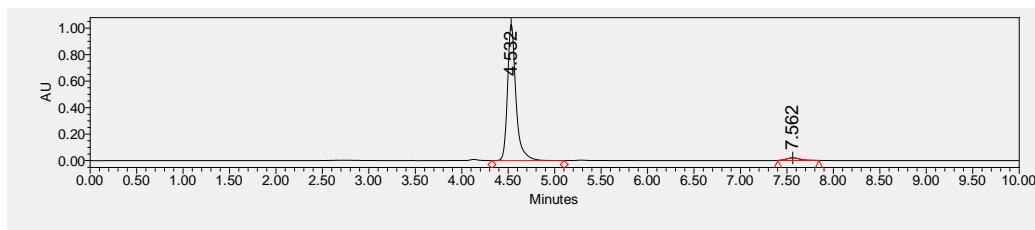

|   | Retention Time | Area    | % Area |
|---|----------------|---------|--------|
| 1 | 4.532          | 6515916 | 97.09  |
| 2 | 7.562          | 195584  | 2.91   |

**Dimethyl (2*S*,10*bS*,*E*)-3-(*tert*-butylimino)-7-methoxy-2-phenyl-2,3-dihydropyrrolo**

**[2,1-*a*]isoquinoline-1,1(10*bH*)-dicarboxylate (8o)**

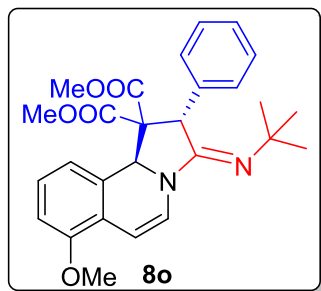

White solid; m.p. 64-68 °C; 38% yield, 97.5:2.5 e.r.;  $[\alpha]_D^{25} = +188.33$  ( $c = 0.24$  in  $\text{CH}_2\text{Cl}_2$ ).

**HPLC** DAICEL CHIRALCEL IA, *n*-hexane/2-propanol = 90/10, flow rate = 1.0 mL/min,  $\lambda = 350$  nm,  $t_R$  (major) = 4.95 min,  $t_R$  (minor) = 8.13 min.

**IR** (neat): 2963, 1738, 1672, 1570, 1468, 1308, 1261, 1211, 1069 and 754  $\text{cm}^{-1}$ .

**$^1\text{H}$  NMR** (400 MHz,  $\text{CDCl}_3$ )  $\delta = 7.33 - 7.26$  (m, 3H), 7.23 - 7.13 (m, 3H), 6.95 (t,  $J = 8.0$  Hz, 1H), 6.83 - 7.77 (m, 1H), 6.72 - 6.45 (m, 1H), 6.05 (d,  $J = 8.0$  Hz, 1H), 5.93 (s, 1H), 4.67 (s, 1H), 3.79 (s, 3H), 3.55 (s, 3H), 3.51 (s, 3H), 1.07 (s, 9H).

**$^{13}\text{C}\{^1\text{H}\}$  NMR** (101 MHz,  $\text{CDCl}_3$ )  $\delta = 169.3, 168.3, 153.5, 135.1, 128.8, 128.4, 128.3, 126.1, 124.0, 123.0, 119.2, 110.1, 99.5, 67.1, 59.0, 55.8, 53.7, 53.3, 52.8, 52.4, 31.7$ .

**HRMS** (ESI-FT) calcd for  $\text{C}_{27}\text{H}_{31}\text{N}_2\text{O}_5^+$  ( $[\text{M}+\text{H}^+]$ ) = 463.2227, Found 463.2227.

Chiral HPLC spectrum **8o**:

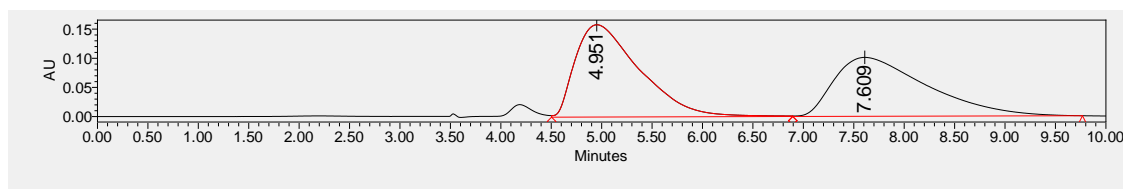

|   | Retention Time | Area    | % Area |
|---|----------------|---------|--------|
| 1 | 4.951          | 7017921 | 51.98  |
| 2 | 7.609          | 6483581 | 48.02  |

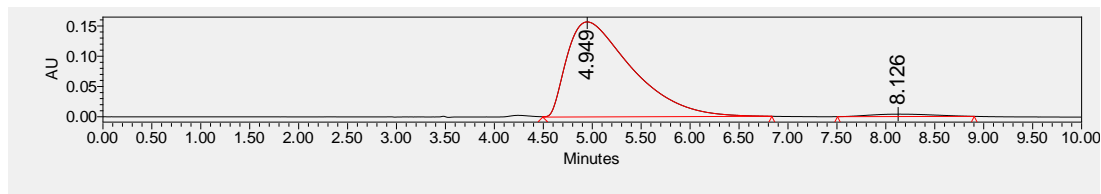

|   | Retention Time | Area    | % Area |
|---|----------------|---------|--------|
| 1 | 4.949          | 7239923 | 97.59  |
| 2 | 8.126          | 179097  | 2.41   |

**Dimethyl (2*S*,10*bS*,*E*)-3-(*tert*-butylimino)-8-cyano-2-phenyl-2,3-dihydropyrrolo  
[2,1-*a*]isoquinoline-1,1(10*bH*)-dicarboxylate (8*p*)**

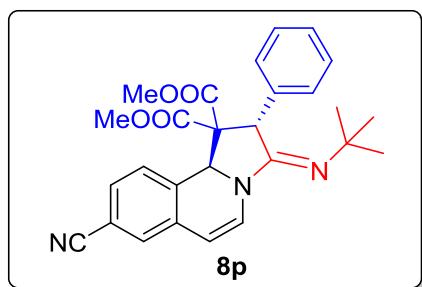

White solid; m.p. 72-76 °C; 59% yield, 99:1 e.r.;  $[\alpha]_D^{25} = +269.15$  ( $c = 0.47$  in  $\text{CH}_2\text{Cl}_2$ ).

**HPLC** DAICEL CHIRALCEL IC, *n*-hexane/2-propanol = 90/10, flow rate = 1.0 mL/min,  $\lambda = 350$  nm,  $t_R$  (major) = 10.73 min,  $t_R$  (minor) = 13.44 min.

**IR** (neat): 2965, 2232, 1740, 1678, 1624, 1491, 1443, 1273, 1209, 1072, 937, 733 and  $706\text{ cm}^{-1}$ .

**$^1\text{H}$  NMR** (400 MHz,  $\text{CDCl}_3$ )  $\delta = 7.33 - 7.26$  (m, 3H),  $7.23 - 7.13$  (m, 3H), 6.95 (t,  $J = 8.0$  Hz, 1H),  $6.83 - 7.77$  (m, 1H),  $6.72 - 6.45$  (m, 1H), 6.05 (d,  $J = 8.0$  Hz, 1H), 5.93 (s, 1H), 4.67 (s, 1H), 3.79 (s, 3H), 3.55 (s, 3H), 3.51 (s, 3H), 1.07 (s, 9H).

**$^{13}\text{C}\{^1\text{H}\}$  NMR** (101 MHz,  $\text{CDCl}_3$ )  $\delta = 168.8, 168.0, 150.3, 135.2, 134.5, 131.8, 129.0, 128.7, 128.6, 127.8, 127.3, 126.9, 118.9, 112.1, 103.4, 66.9, 58.9, 53.9, 53.0, 52.9, 52.7, 31.6$ .

**HRMS** (ESI-FT) calcd for  $\text{C}_{27}\text{H}_{28}\text{N}_3\text{O}_4^+$  ( $[\text{M}+\text{H}^+]$ ) = 458.2074, Found 458.2072.

Chiral HPLC spectrum **8p**:

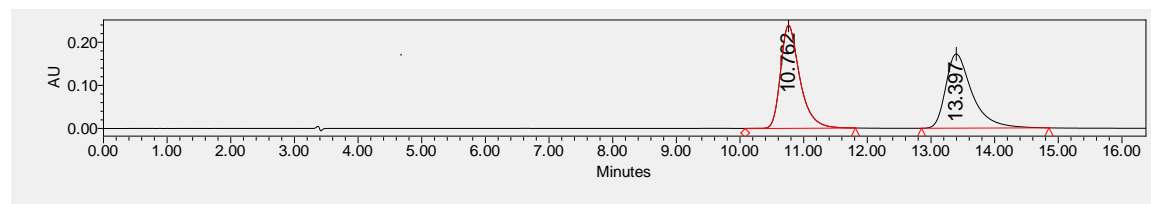

|   | Retention Time | Area    | % Area |
|---|----------------|---------|--------|
| 1 | 10.762         | 5016888 | 50.35  |
| 2 | 13.397         | 4947944 | 49.65  |

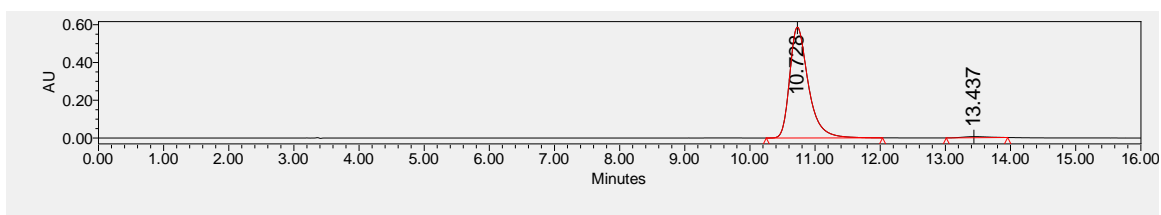

|   | Retention Time | Area     | % Area |
|---|----------------|----------|--------|
| 1 | 10.728         | 11661955 | 98.68  |
| 2 | 13.437         | 156288   | 1.32   |

**Dimethyl (2*S*,10*bS*,*E*)-3-(adamantan-1-ylimino)-7-nitro-2-phenyl-2,3-dihydropyrrolo[2,1-*a*]isoquinoline-1,1(10*bH*)-dicarboxylate (8q)**

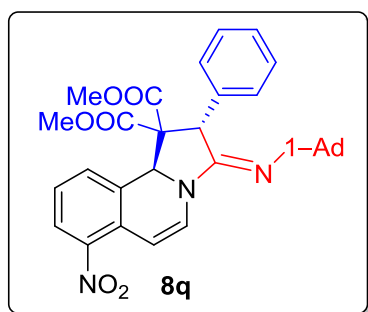

Orange red oil; 73% yield, 98:2 e.r.;  $[\alpha]_D^{25} = +140.97$  ( $c = 0.62$  in  $\text{CH}_2\text{Cl}_2$ ).

**HPLC** DAICEL CHIRALCEL IA, *n*-hexane/2-propanol = 90/10, flow rate = 1.0 mL/min,  $\lambda = 350$  nm,  $t_R$  (major) = 4.78 min,  $t_R$  (minor) = 6.82 min.

**IR** (neat): 2909, 2853, 1740, 1682, 1612, 1524, 1404, 1346, 1265, 1219, 1090, 766, 735 and 708  $\text{cm}^{-1}$ .

**$^1\text{H}$  NMR** (400 MHz,  $\text{CDCl}_3$ )  $\delta = 7.76 - 7.67$  (m, 1H), 7.47 (d,  $J = 8.0$  Hz, 1H), 7.44 - 7.70 (m, 1H), 7.36 - 7.28 (m, 3H), 7.16 - 7.02 (m, 2H), 7.03 (t,  $J = 8.0$  Hz, 1H), 6.31 (d,  $J = 8.0$  Hz, 1H), 5.92 (s, 1H), 4.71 (s, 1H), 3.60 (s, 3H), 3.56 (s, 3H), 1.98 - 1.90 (m, 3H), 1.68 - 1.63 (m, 3H), 1.59 - 1.47 (m, 9H).

**$^{13}\text{C}\{^1\text{H}\}$  NMR** (101 MHz,  $\text{CDCl}_3$ )  $\delta = 168.8, 168.0, 149.2, 144.6, 134.8, 131.3, 129.6, 129.3, 129.2, 129.0, 128.6, 124.8, 124.6, 98.5, 67.0, 58.5, 54.7, 53.5, 53.1, 52.7, 44.2, 36.5, 29.8$ .

**HRMS** (ESI-FT) calcd for  $\text{C}_{32}\text{H}_{34}\text{N}_3\text{O}_6^+$  ( $[\text{M}+\text{H}^+]$ ) = 556.2442, Found 556.2444.

Chiral HPLC spectrum **8q**:

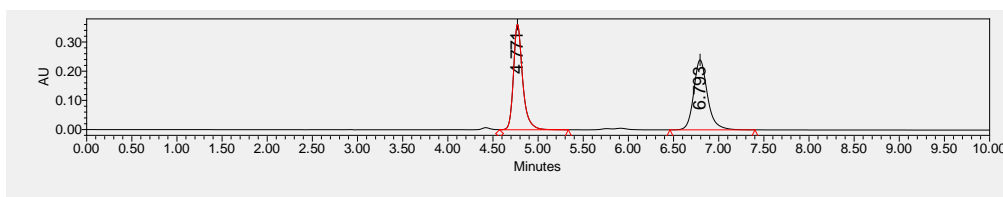

|   | Retention Time | Area    | % Area |
|---|----------------|---------|--------|
| 1 | 4.771          | 2555003 | 50.08  |
| 2 | 6.793          | 2547028 | 49.92  |

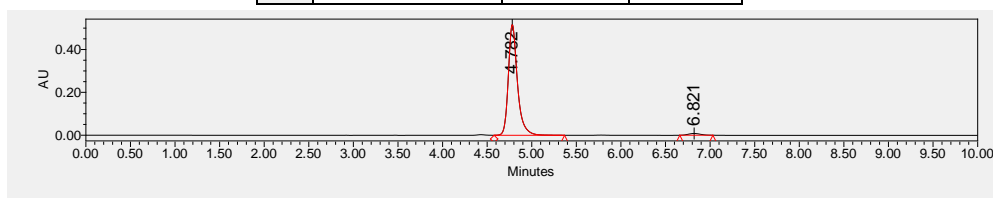

|   | Retention Time | Area    | % Area |
|---|----------------|---------|--------|
| 1 | 4.782          | 3673779 | 97.91  |
| 2 | 6.821          | 78396   | 2.09   |

**Dimethyl (2*S*,10*bS*,*E*)-3-(isopropylimino)-7-nitro-2-phenyl-2,3-dihydropyrrolo[2,1-*a*]isoquinoline-1,1(10*bH*)-dicarboxylate (**8r**)**

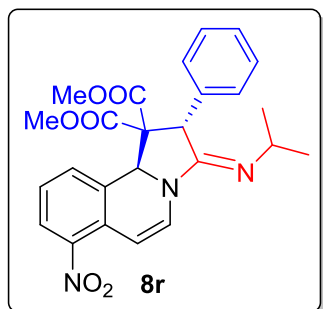

Orange red oil; 75% yield, 89:11 e.r.;  $[\alpha]_D^{25} = +51.62$  ( $c = 0.37$  in  $\text{CH}_2\text{Cl}_2$ ).

**HPLC** DAICEL CHIRALCEL IA, *n*-hexane/2-propanol = 90/10, flow rate = 1.0 mL/min,  $\lambda = 350$  nm,  $t_R$  (major) = 5.19 min,  $t_R$  (minor) = 8.24 min.

**IR** (neat): 2965, 2874, 1740, 1678, 1614, 1524, 1462, 1406, 1271, 1177, 1074, 768, 735 and 704  $\text{cm}^{-1}$ .

**$^1\text{H}$  NMR** (400 MHz,  $\text{CDCl}_3$ )  $\delta = 7.75 - 7.70$  (m, 1H), 7.45 - 7.37 (m, 2H), 7.35 - 7.29 (m, 3H), 7.19 - 7.14 (m, 2H), 7.07 (t,  $J = 8.0$  Hz, 1H), 6.32 (d,  $J = 8.0$ , 1H), 6.08 (s, 1H), 4.67 (s, 1H), 3.59 (s, 3H), 3.50 (s, 3H), 3.42 (p,  $J = 6.0$  Hz, 1H), 1.12 (d,  $J = 6.0$  Hz, 3H), 0.66 (d,  $J = 6.0$  Hz, 3H).

**$^{13}\text{C}\{^1\text{H}\}$  NMR** (101 MHz,  $\text{CDCl}_3$ )  $\delta = 168.7, 168.0, 153.9, 144.8, 134.2, 131.2, 129.5,$

129.1, 129.0, 128.8, 128.7, 125.2, 124.7, 99.0, 66.7, 60.5, 53.2, 52.7, 51.6, 51.0, 24.6, 24.0.

**HRMS** (ESI-FT) calcd for  $C_{25}H_{26}N_3O_6^+$  ( $[M+H]^+$ ) = 464.1816, Found 464.1809.

Chiral HPLC spectrum **8r**:

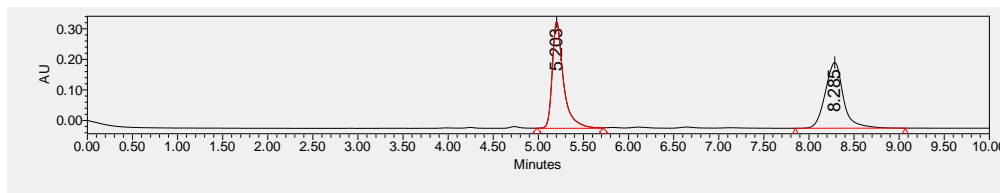

|   | Retention Time | Area    | % Area |
|---|----------------|---------|--------|
| 1 | 5.203          | 3009974 | 50.08  |
| 2 | 8.285          | 3000898 | 49.92  |

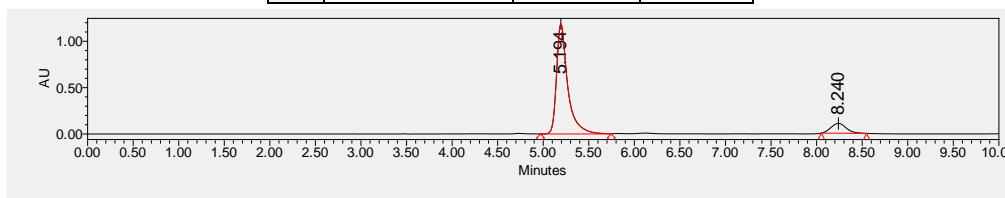

|   | Retention Time | Area     | % Area |
|---|----------------|----------|--------|
| 1 | 5.194          | 10094442 | 89.10  |
| 2 | 8.240          | 1235233  | 10.90  |

**Dimethyl (*E*)-3-((2-methoxy-2-oxoethyl)imino)-7-nitro-2-phenyl-2,3-dihydropyrrolo[2,1-a]isoquinoline-1,1(10bH)-dicarboxylate (**8s**)**

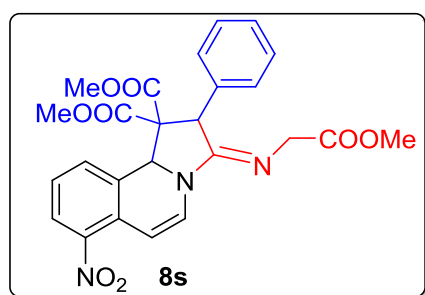

Orange red oil; 81% yield, 50:50 e.r.;

**IR** (neat): 2955, 2853, 1738, 1676, 1620, 1526, 1462, 1445, 1406, 1350, 1275, 1211, 1184, 1088, 843, 770, 737 and 702  $cm^{-1}$ .

**<sup>1</sup>H NMR** (400 MHz,  $CDCl_3$ )  $\delta$  = 7.78 – 7.70 (m, 1H), 7.42 (d,  $J$  = 8.0 Hz, 2H), 7.36 – 7.29 (m, 3H), 7.20 – 7.14 (m, 2H), 7.10 (t,  $J$  = 8.0 Hz, 1H), 6.39 (d,  $J$  = 8.0 Hz, 1H), 6.15 (s, 1H), 4.63 (s, 1H), 4.04 – 4.00 (m, 1H), 3.85 – 3.78 (m, 1H), 3.60 (s, 6H), 3.47 (s, 3H).

$^{13}\text{C}\{^1\text{H}\}$  NMR (101 MHz,  $\text{CDCl}_3$ )  $\delta$  = 171.1, 168.4, 167.8, 159.0, 145.1, 132.4, 131.1, 129.6, 129.2, 129.1, 128.0, 125.8, 124.8, 100.5, 66.6, 61.1, 53.4, 52.8, 52.2, 52.1, 52.0.

HRMS (ESI-FT) calcd for  $\text{C}_{25}\text{H}_{24}\text{N}_3\text{O}_8^+$  ( $[\text{M}+\text{H}^+]$ ) = 494.1558, Found 494.1562.

**Dimethyl (2*S*,10*bS*,*E*)-3-(tert-butylimino)-2-cycloheptyl-7-nitro-2,3-dihydropyrrolo[2,1-*a*]isoquinoline-1,1(10*bH*)-dicarboxylate (8t)**

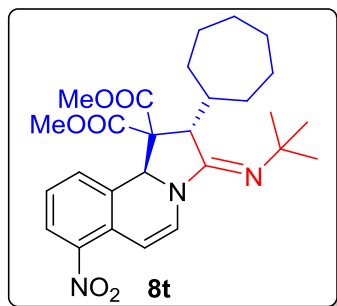

Orange red oil; 21% yield, 77:23 e.r.;  $[\alpha]_D^{21} = +48.89$  ( $c = 0.12$  in  $\text{CH}_2\text{Cl}_2$ ).

UPC<sup>2</sup> Phenomenex CHIRALCEL IA,  $\text{CO}_2/\text{CH}_3\text{CH}_2\text{OH} = 90/10$ ,  $\lambda = 254$  nm, flow rate = 1.5 mL/min,  $t_R$  (major) = 3.57 min,  $t_R$  (minor) = 4.20 min.

IR (neat): 2360, 1733, 1616, 1522, 1458, 1276, 1259, 764 and 750  $\text{cm}^{-1}$ .

$^1\text{H}$  NMR (400 MHz,  $\text{CDCl}_3$ )  $\delta$  = 7.70 (d,  $J = 8.0$  Hz, 1H), 7.51 (d,  $J = 8.0$  Hz, 1H), 7.29 – 7.22 (m, 2H), 7.04 (t,  $J = 8.0$  Hz, 1H), 6.20 (d,  $J = 8.0$  Hz, 1H), 5.71 (s, 1H), 3.89 (s, 3H), 3.59 – 3.48 (m, 4H), 1.78 – 1.63 (m, 9H), 1.63 – 1.50 (m, 3H), 1.48 – 1.41 (m, 1H), 1.32 (s, 9H).

$^{13}\text{C}\{^1\text{H}\}$  NMR (101 MHz,  $\text{CDCl}_3$ )  $\delta$  = 169.8, 169.0, 148.9, 144.4, 131.4, 129.9, 129.6, 129.4, 124.6, 124.5, 97.6, 67.1, 58.9, 54.2, 53.6, 52.9, 40.6, 34.3, 33.1, 31.9, 28.0, 27.5, 27.1.

HRMS (ESI-FT) calcd for  $\text{C}_{27}\text{H}_{36}\text{N}_3\text{O}_6^+$  ( $[\text{M}+\text{H}^+]$ ) = 498.2599, Found 498.1600.

Chiral HPLC spectrum 8t:

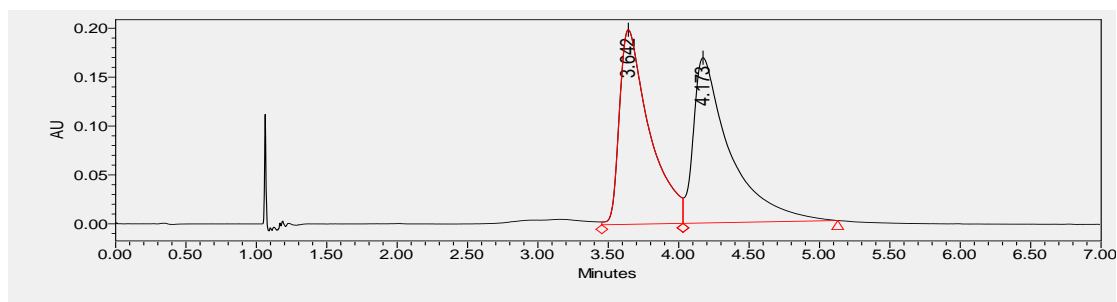



|   | Retention Time | Area    | % Area |
|---|----------------|---------|--------|
| 1 | 3.642          | 2938978 | 49.07  |
| 2 | 4.173          | 3050489 | 50.93  |

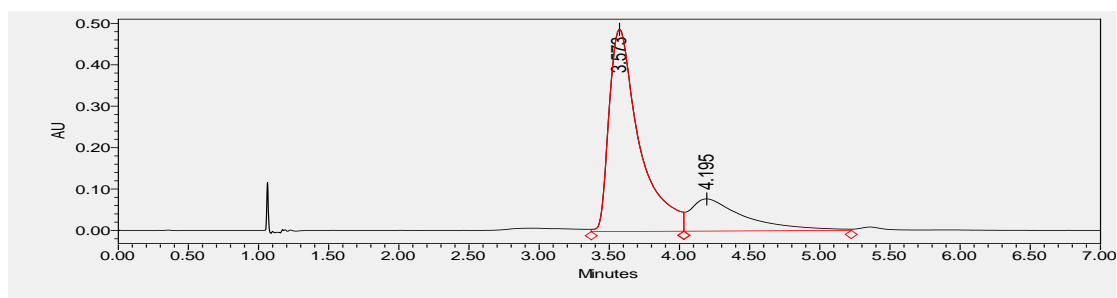

|   | Retention Time | Area    | % Area |
|---|----------------|---------|--------|
| 1 | 3.573          | 7304373 | 77.69  |
| 2 | 4.195          | 2097491 | 22.31  |

**Dimethyl (2*S*,10*bS*,*E*)-3-(naphthalen-2-ylimino)-7-nitro-2-phenyl-2,3-dihydropyrrolo[2,1-*a*]isoquinoline-1,1(10*bH*)-dicarboxylate (8u)**

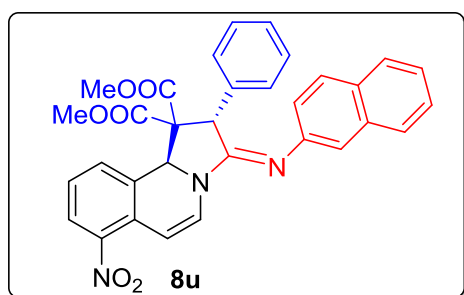

Orange red oil; 68% yield, 73:27 e.r.;  $[\alpha]_D^{21} = +89.19$  ( $c = 0.67$  in  $\text{CH}_2\text{Cl}_2$ ).

**HPLC** DAICEL CHIRALCEL IA, *n*-hexane/2-propanol = 90/10, flow rate = 1.0 mL/min,  $\lambda = 254$  nm,  $t_R$  (major) = 23.87 min,  $t_R$  (minor) = 37.11 min.

**IR** (neat): 2361, 1733, 1672, 1623, 1526, 1276, 1259, 764 and 750  $\text{cm}^{-1}$ .

**$^1\text{H}$  NMR** (400 MHz,  $\text{CDCl}_3$ )  $\delta = 7.82 - 7.77$  (m, 1H), 7.74 - 7.68 (m, 1H), 7.58 - 7.43 (m, 4H), 7.39 - 7.28 (m, 3H), 7.24 - 7.13 (m, 3H), 6.93 - 6.85 (m, 2H), 6.79 - 6.76 (m, 1H), 6.72 (dd,  $J = 8.6, 2.1$  Hz, 1H), 6.53 (dd,  $J = 8.0, 0.7$  Hz, 1H), 6.28 (s, 1H), 4.54 (s, 1H), 3.67 (s, 3H), 3.39 (s, 3H).

**$^{13}\text{C}\{^1\text{H}\}$  NMR** (101 MHz,  $\text{CDCl}_3$ )  $\delta = 168.6, 167.9, 157.1, 147.1, 145.2, 134.1, 133.9, 131.2, 130.2, 129.7, 128.9, 128.7, 128.4, 127.7, 127.6, 127.6, 127.2, 126.0, 126.0, 124.9, 124.3, 122.5, 117.4, 101.5, 66.7, 61.2, 53.4, 52.7, 52.4$ .

**HRMS** (ESI-FT) calcd for  $\text{C}_{32}\text{H}_{26}\text{N}_3\text{O}_6^+$  ( $[\text{M}+\text{H}^+]$ ) = 548.1816, Found 548.1816.

Chiral HPLC spectrum **8u**:

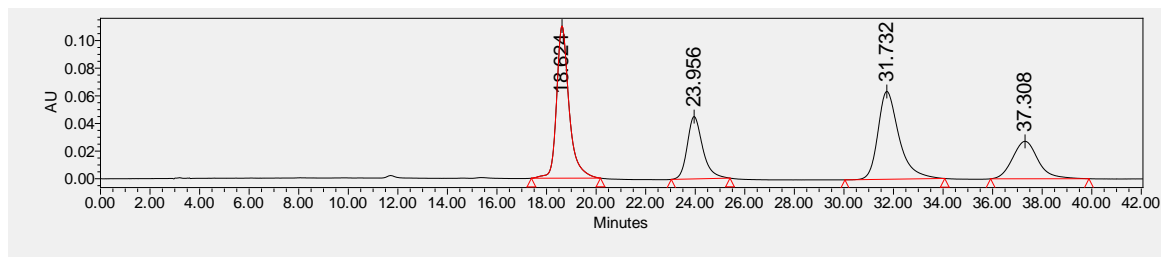

|   | Retention Time | Area    | % Area |
|---|----------------|---------|--------|
| 1 | 18.624         | 3850991 | 33.51  |
| 2 | 23.956         | 1950565 | 16.97  |
| 3 | 31.732         | 3755358 | 32.67  |
| 4 | 37.308         | 1936777 | 16.85  |

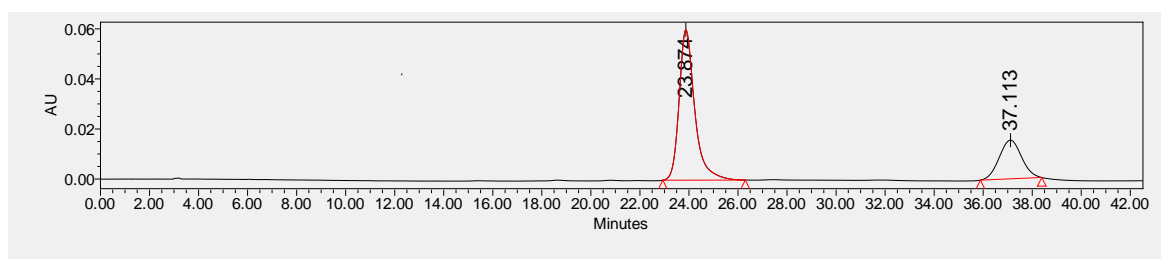

|   | Retention Time | Area    | % Area |
|---|----------------|---------|--------|
| 1 | 23.874         | 2652510 | 73.03  |
| 2 | 37.113         | 979436  | 26.97  |

**Dimethyl (2*S*,10*bS*,*E*)-7-amino-3-(*tert*-butylimino)-2-phenyl-2,3-dihydropyrrolo[2,1-*a*]isoquinoline-1,1(10*bH*)-dicarboxylate (**8v**)**

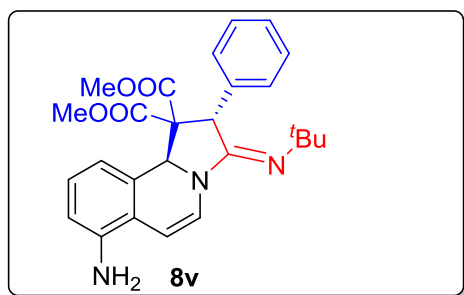

Coreless oil; 32% yield, 98:2 e.r.;  $[\alpha]_D^{21} = +114.13$  ( $c = 0.18$  in  $\text{CH}_2\text{Cl}_2$ ).

**HPLC** DAICEL CHIRALCEL IA, *n*-hexane/2-propanol = 70/30, flow rate = 1.0 mL/min,  $\lambda = 254$  nm,  $t_R$  (major) = 4.96 min,  $t_R$  (minor) = 6.39 min.

**IR** (neat): 2965, 1740, 1682, 1612, 1526, 1466, 1350, 1263, 770 and 735  $\text{cm}^{-1}$ .

**$^1\text{H}$  NMR** (400 MHz,  $\text{CDCl}_3$ )  $\delta = 7.34 - 7.27$  (m, 3H), 7.24 - 7.20 (m, 1H), 7.18 -

7.12 (m, 2H), 6.81 (t,  $J = 7.8$  Hz, 1H), 6.67 – 6.62 (m, 1H), 6.50 (d,  $J = 7.8$  Hz, 1H), 5.90 (s, 1H), 5.65 (d,  $J = 7.8$  Hz, 1H), 4.65 (s, 1H), 3.66 – 3.52 (m, 5H), 3.50 (s, 3H), 1.07 (s, 9H).

$^{13}\text{C}\{^1\text{H}\}$  NMR (101 MHz,  $\text{CDCl}_3$ )  $\delta = 169.4, 168.3, 151.4, 140.2, 135.2, 129.3, 128.8, 128.6, 128.3, 126.3, 124.0, 119.6, 117.8, 115.7, 99.8, 67.0, 59.1, 53.7, 53.4, 52.7, 52.4, 31.7$ .

HRMS (ESI-FT) calcd for  $\text{C}_{26}\text{H}_{30}\text{N}_3\text{O}_4^+$  ( $[\text{M}+\text{H}^+]$ ) = 448.2231, Found 448.2237.

Chiral HPLC spectrum **8v**:

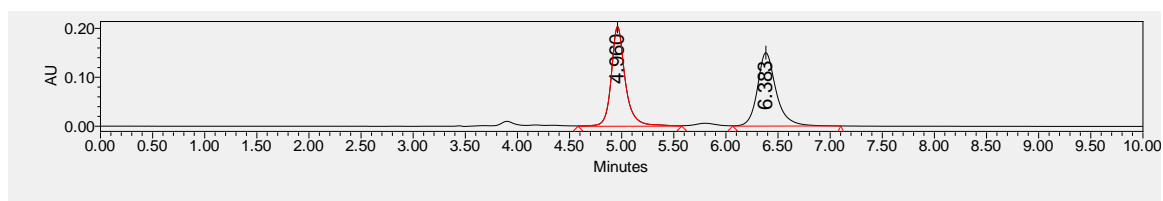

|   | Retention Time | Area    | % Area |
|---|----------------|---------|--------|
| 1 | 4.960          | 1911210 | 50.58  |
| 2 | 6.383          | 1867712 | 49.42  |

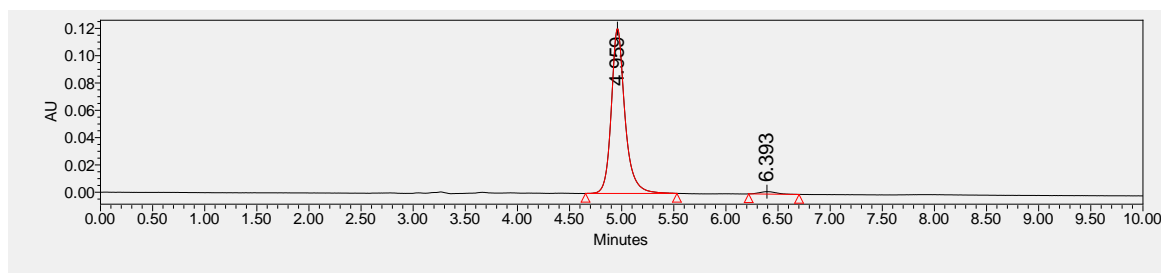

|   | Retention Time | Area    | % Area |
|---|----------------|---------|--------|
| 1 | 4.959          | 1096958 | 98.17  |
| 2 | 6.393          | 20398   | 1.83   |

### Supplementary Table 10. Control experiment 1

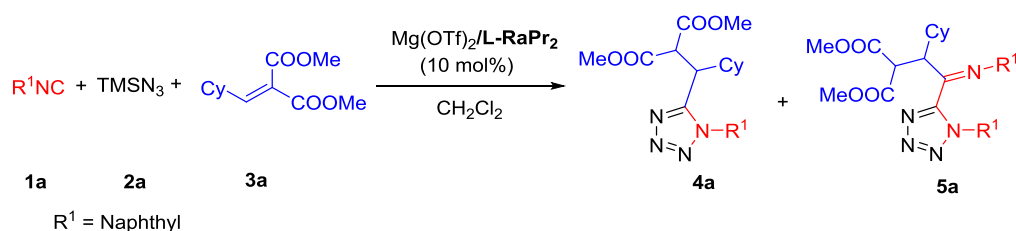

| Entry | Conditions               | Results |
|-------|--------------------------|---------|
| 1     | No <b>2a</b> , 30 °C, 3h | mess    |
| 2     | No <b>3a</b> , 30 °C, 3h | nr      |
| 3     | No <b>1a</b> , 30 °C, 3h | nr      |

Reactions were carried out with [**1a** (0.20 mmol), **2a** (0.24 mmol), **3a** (0.20 mmol)] and  $\text{Mg(OTf)}_2/\text{L-RaPr}_2$  (1.4:1.0, 10 mol%) in  $\text{CH}_2\text{Cl}_2$  (1.0 mL) at 30 °C for 3 h.

**Supplementary Discussion 3.** It was proved that in the presence of chiral Lewis acid catalyst, no reaction occurred after mixing **1a** and **2a** or mixing **2a** and **3a**. Isocyanide **1a** could react with **3a** smoothly, however, only messy mixture was obtained at the end of reaction. These results implied that it is the addition of isocyanide **1a** to **3a** catalyzed by chiral Lewis acid which triggered this type of MCRs.

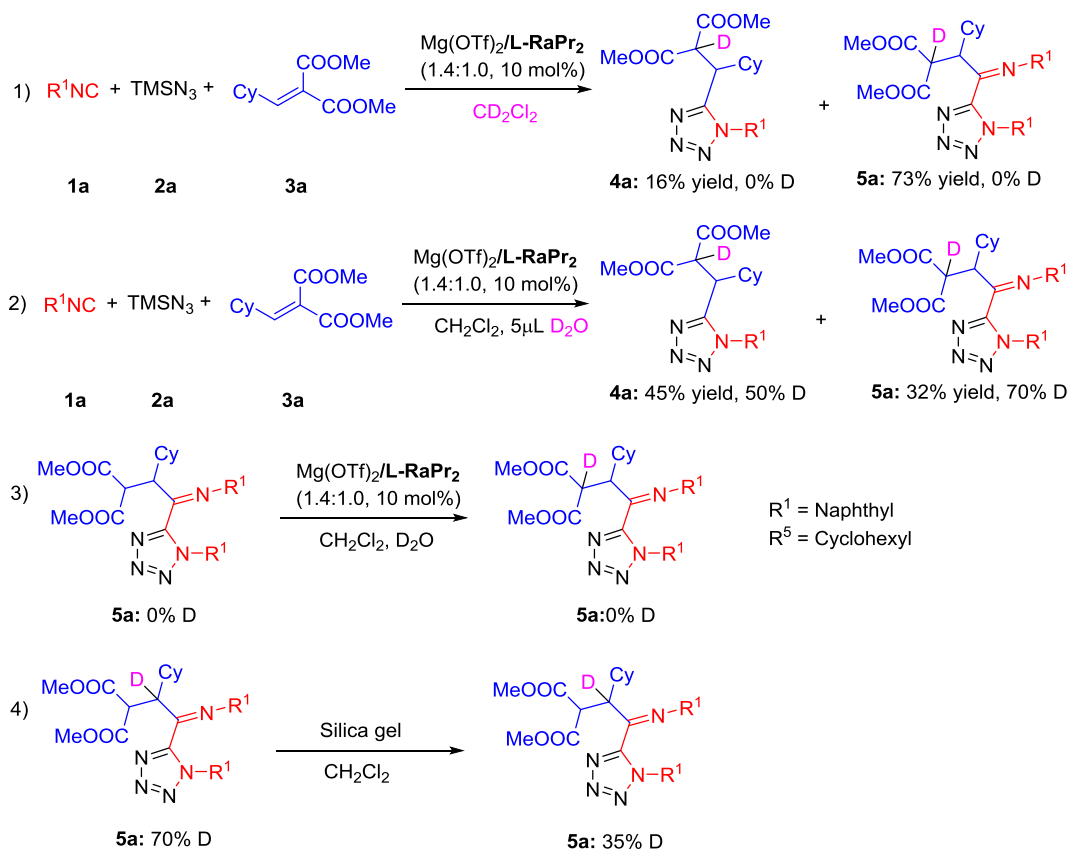

### Supplementary Figure 8. Control experiment 2

#### Supplementary Discussion 4.

- 1) Reactions were carried out with **1a** (0.10 mmol), **2a** (0.12mmol), **3a** (0.10 mmol) and  $\text{Mg}(\text{OTf})_2/\text{L-RaPr}_2$  (1.4:1.0, 10 mol%) in  $\text{CD}_2\text{Cl}_2$  (1.0 mL) at 30 °C for 3 h.  
It proved that the hydrogen source of the product does not come from  $\text{CD}_2\text{Cl}_2$ .
- 2) Reactions were carried out with **1a** (0.10 mmol), **2a** (0.12mmol), **3a** (0.10 mmol), 5 $\mu\text{L}$   $\text{D}_2\text{O}$  and  $\text{Mg}(\text{OTf})_2/\text{L-RaPr}_2$  (1.4:1.0, 10 mol%) in  $\text{CH}_2\text{Cl}_2$  (1.0 mL) at 30 °C for 3 h. The products were separated by silica gel column chromatography.  
This observation not only indicated that the proton transfer was facilitated by a trace amount of water but also suggested water has a remarkable influence on the pathway.
- 3) Reactions were carried out with **5a** (0.10 mmol), 5 $\mu\text{L}$   $\text{D}_2\text{O}$  and  $\text{Mg}(\text{OTf})_2/\text{L-RaPr}_2$  (1.4:1.0, 10 mol%) in  $\text{CH}_2\text{Cl}_2$  (1.0 mL) at 30 °C for 3 h.
- 4) Reactions were carried out with **5a** (70% deuterium) and silica gel in  $\text{CD}_2\text{Cl}_2$  (1.0 mL) at 30 °C for 3 h.  
It explained the reason of different deuterium of **4a** and **5a** in the reaction 2 and the deuterium is not stable.

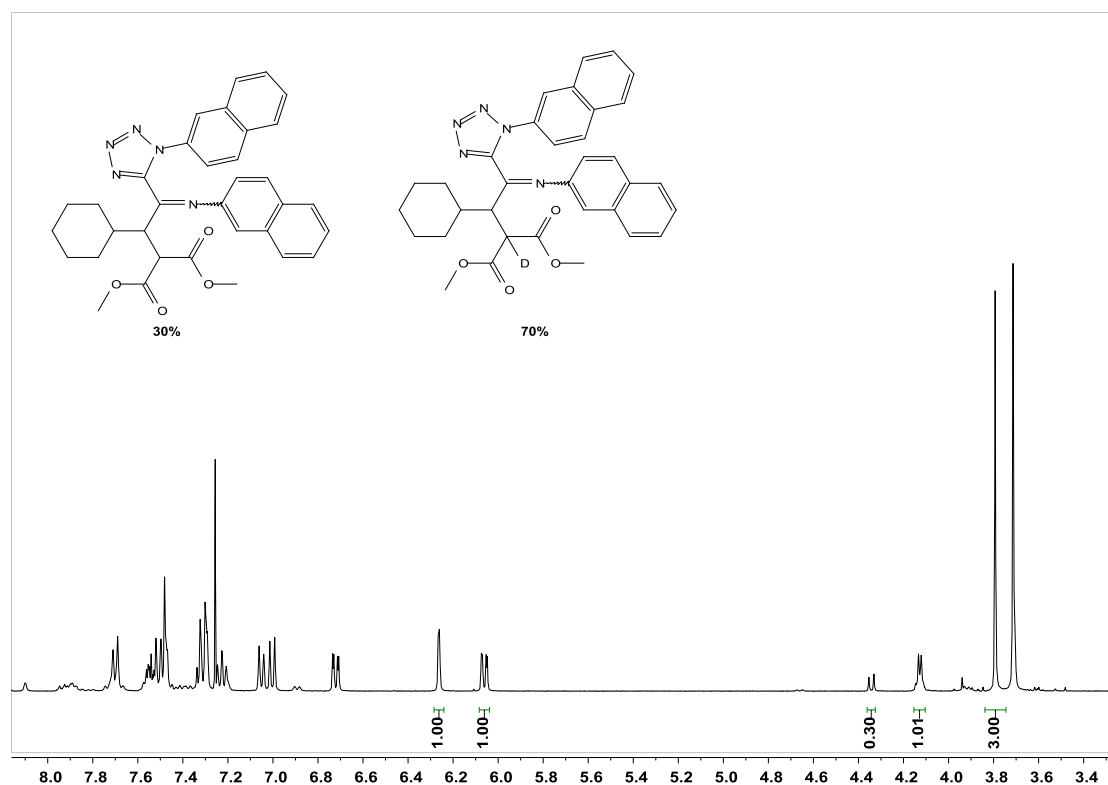

Supplementary Figure 9.  $^1\text{H}$  spectra for deuterated **5a**

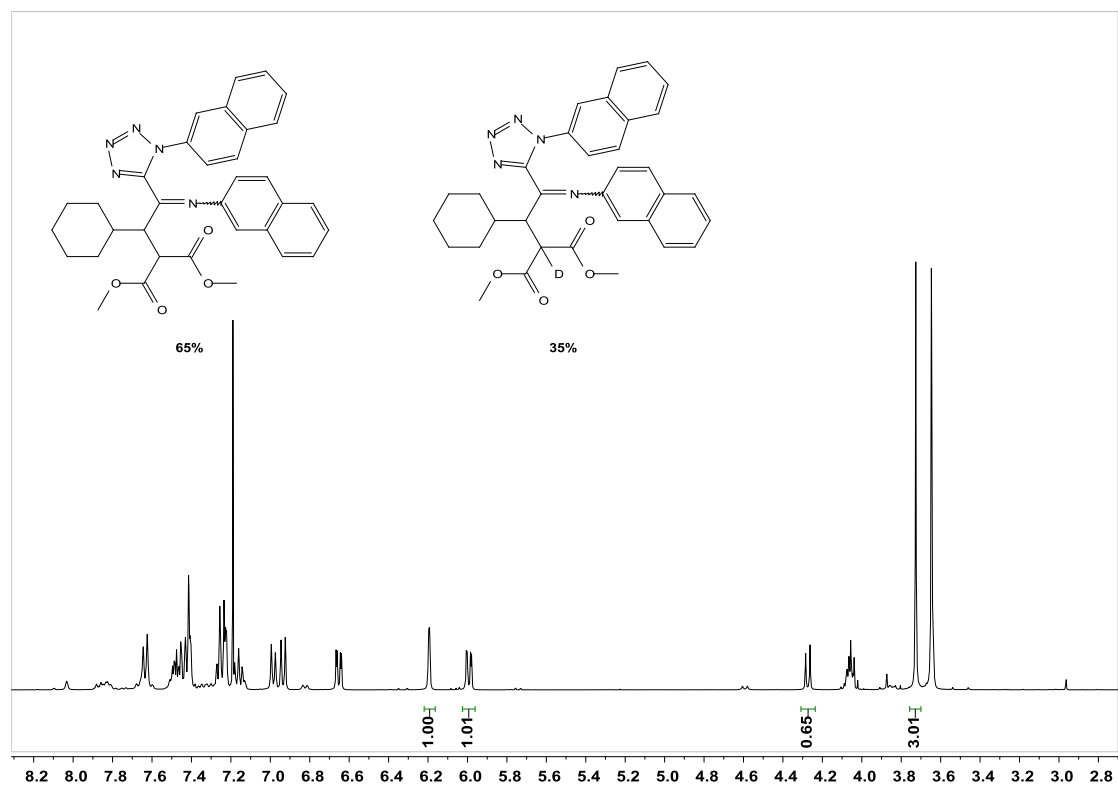

**Supplementary Figure 10.**  $^1\text{H}$  spectra for deuterated **5a**

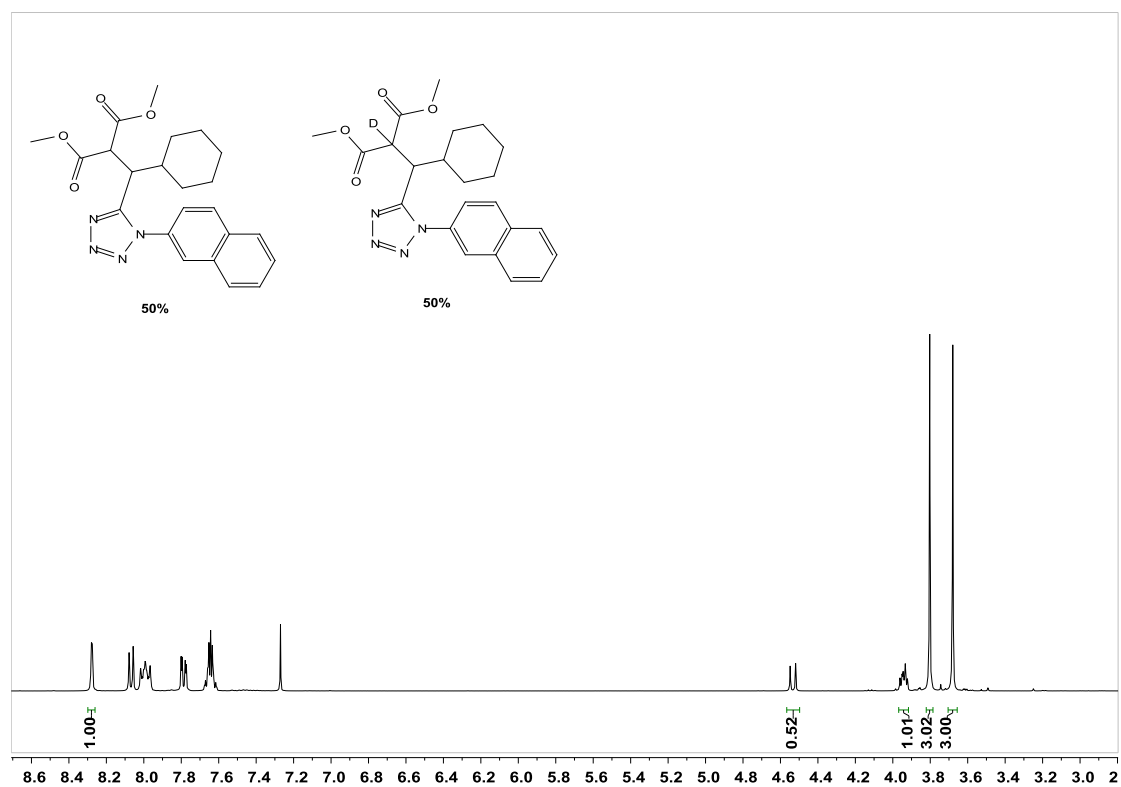

**Supplementary Figure 11.**  $^1\text{H}$  spectra for deuterated **4a**

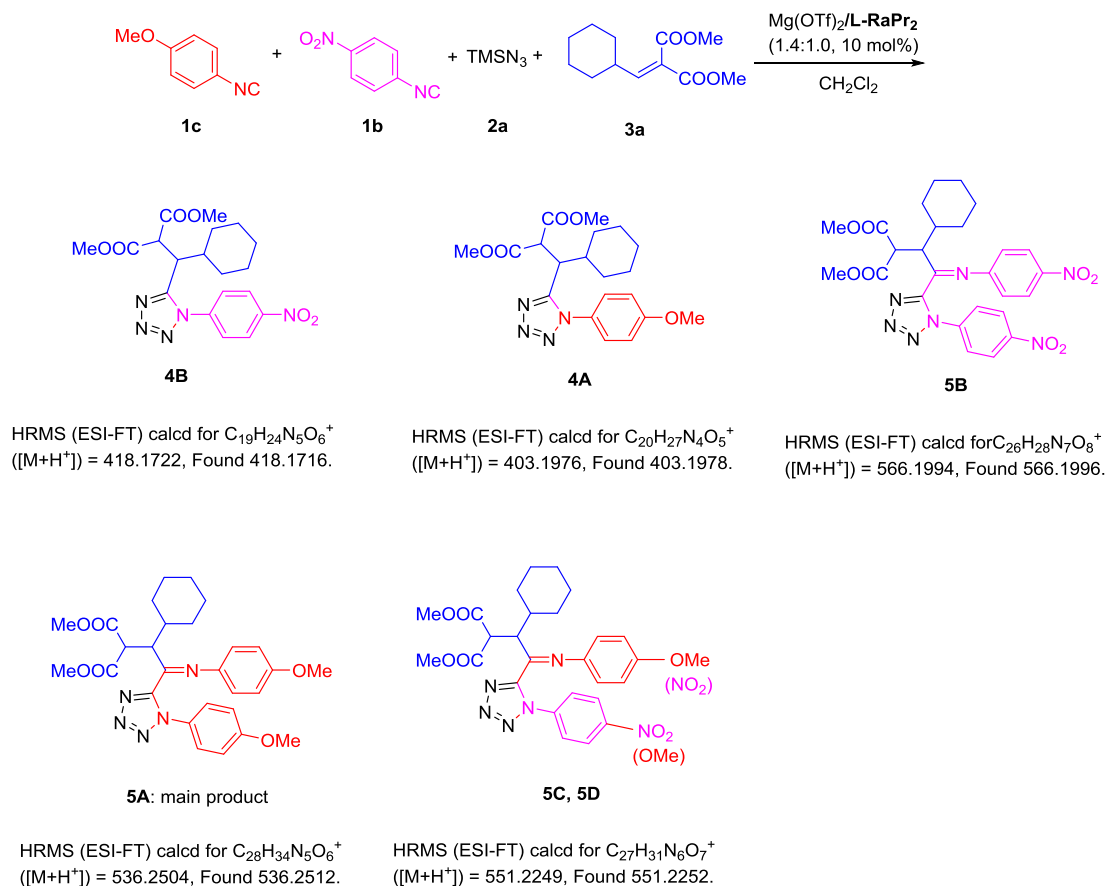

### Supplementary Figure 12. Control experiment 3

Reactions were carried out with **1b** (0.10 mmol), **1c** (0.10 mmol) **2a** (0.24mmol), **3a** (0.20 mmol) and  $\text{Mg(OTf)}_2/\text{L-RaPr}_2$  (1.4:1.0, 10 mol%) in  $\text{CH}_2\text{Cl}_2$  (1.0 mL) at 30 °C for 3 h.

### Supplementary Discussion 5.

It proved the reaction both three-molecule reaction pathway and four-molecule reaction pathway shared with the same intermediate. Moreover, the results mentioned above also illustrated that electron-rich isocyanides were more reactive than electron-poor isocyanides in current system.

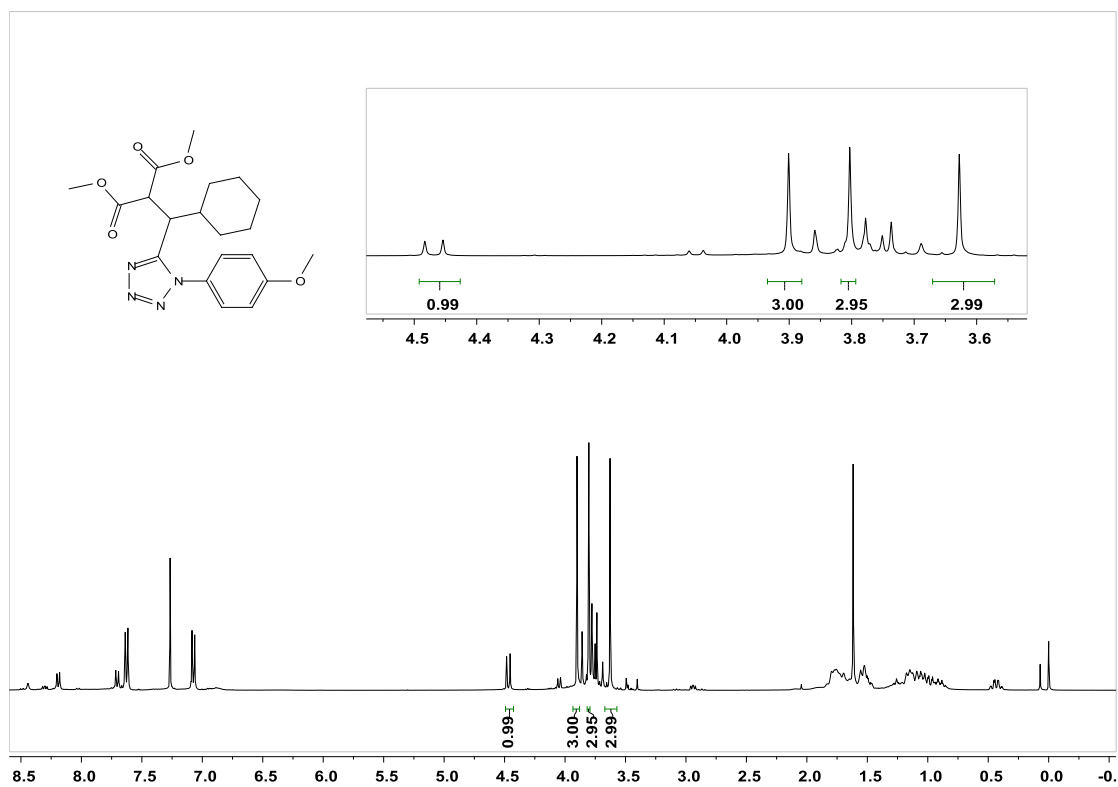

**Supplementary Figure 13.**  $^1\text{H}$  spectra for product mixture 1

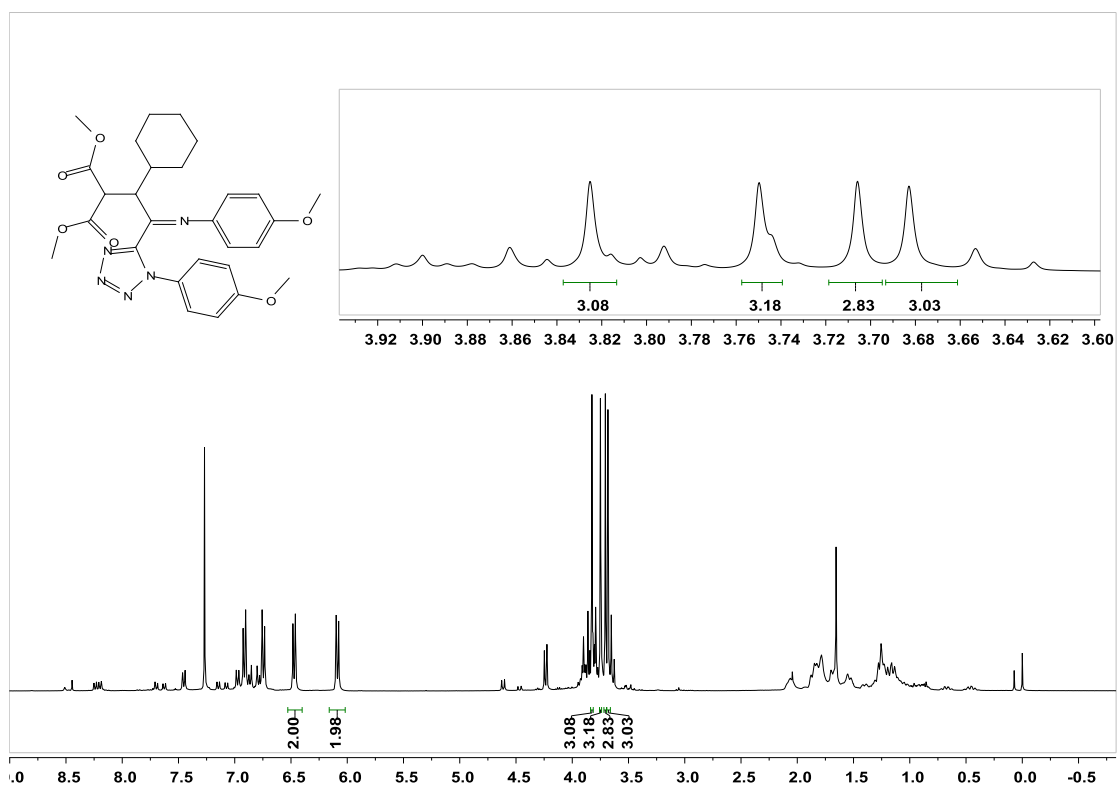

**Supplementary Figure 14.**  $^1\text{H}$  spectra for product mixture 2



XQ-3-203-2 #543 RT: 4.85 AV: 1 NL: 9.29E5  
T: FTMS + c ESI Full ms [120.0000-1000.0000]

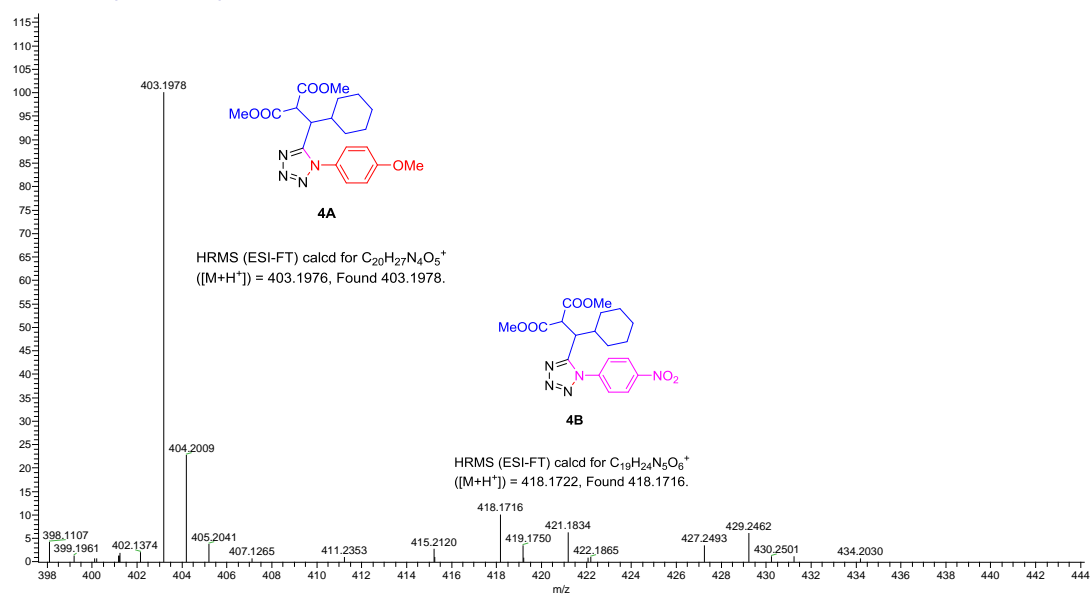

**Supplementary Figure 15. HRMS for 4A**

XQ-3-203-2 #109 RT: 0.98 AV: 1 NL: 2.86E5  
T: FTMS + c ESI Full ms [120.0000-1000.0000]

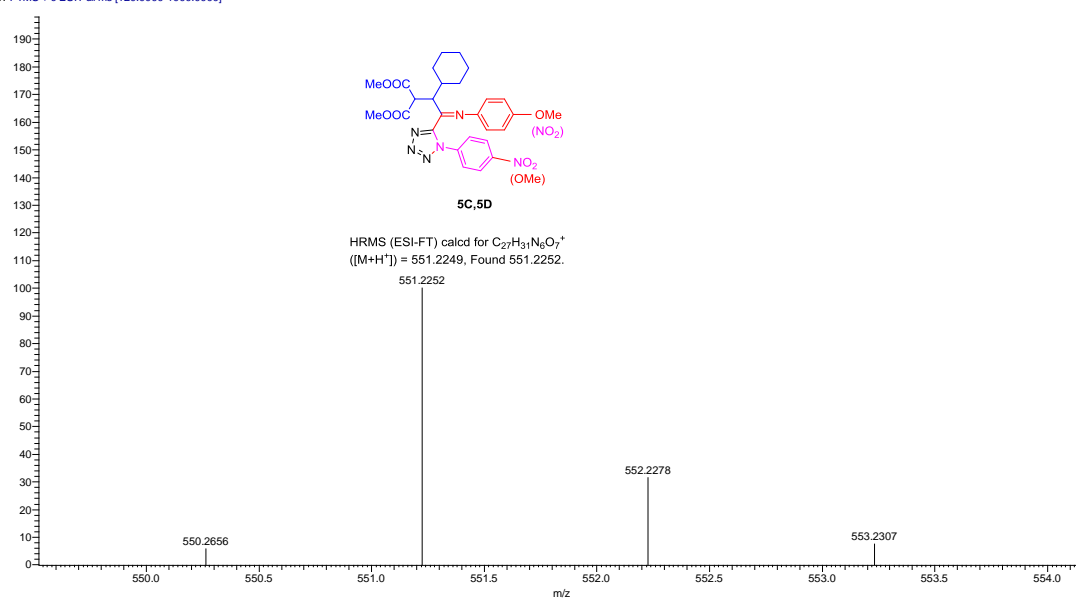

**Supplementary Figure 16. HRMS for 5C and 5D**

XQ-3-203-X #109 RT: 0.98 AV: 1 NL: 8.00E6  
T: FTMS + c ESI Full ms [120.0000-1000.0000]

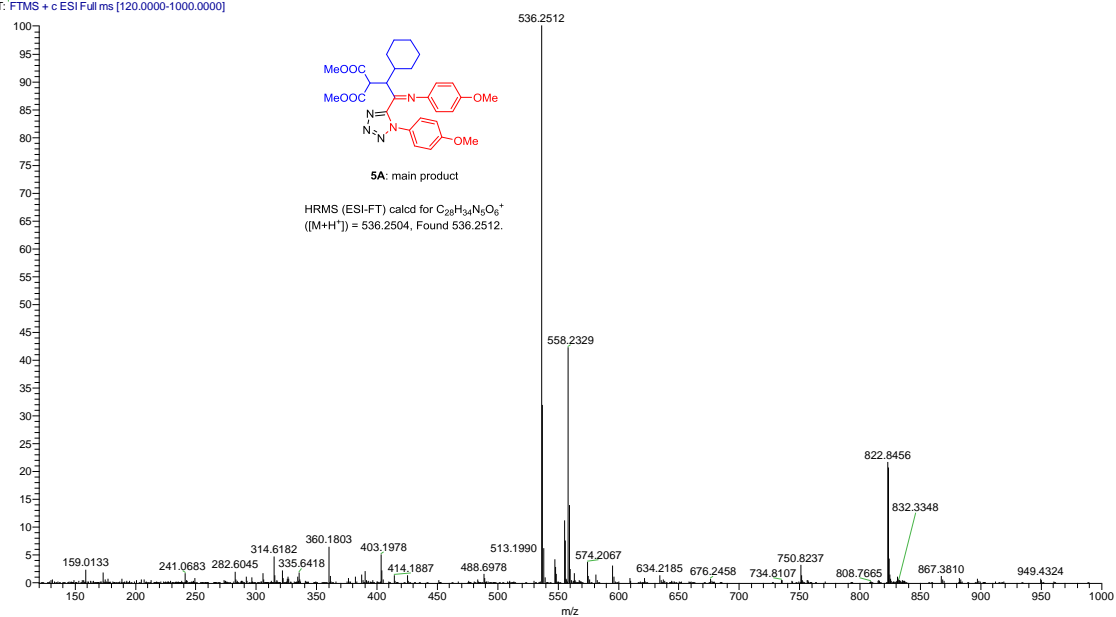

**Supplementary Figure 17. HRMS for 5A**

XQ-3-203-S #101 RT: 0.91 AV: 1 NL: 1.83E5  
T: FTMS + c ESI Full ms [120.0000-1000.0000]

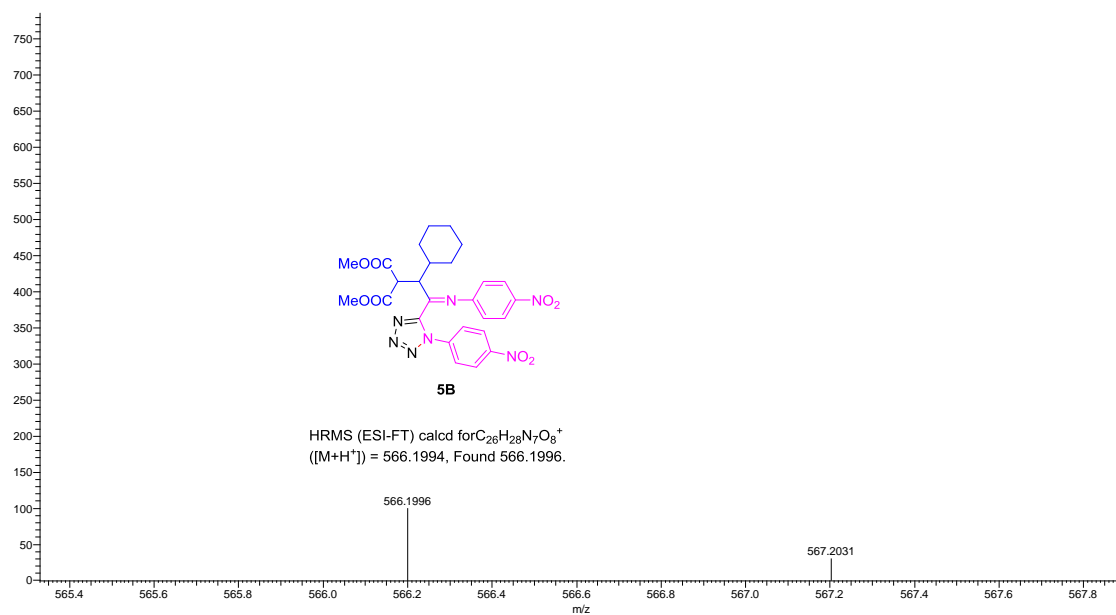

**Supplementary Figure 18. HRMS for 5B**

**Supplementary Table 11.** Influence of metal salts and base

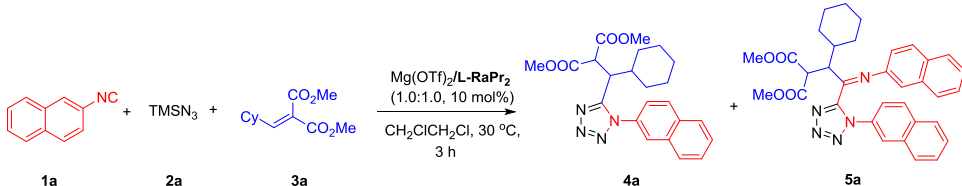

| Entry <sup>a</sup> | Additive                           | Yield of <b>4a</b> (%) <sup>b</sup> | Yield of <b>5a</b> (%) <sup>b</sup> | e.r. of <b>4a</b> <sup>c</sup> | e.r. of <b>5a</b> <sup>c</sup> |
|--------------------|------------------------------------|-------------------------------------|-------------------------------------|--------------------------------|--------------------------------|
| 1                  | -                                  | 38                                  | 51                                  | 83.5:16.5                      | 96:4                           |
| 2                  | Ca(OTf) <sub>2</sub>               | -                                   | 81                                  | -                              | 94:6                           |
| 3 <sup>b</sup>     | LiOTf                              | -                                   | 88                                  | -                              | 94:6                           |
| 4 <sup>b</sup>     | NaOTf                              | -                                   | 86                                  | -                              | 94:6                           |
| 5                  | Mg(ClO <sub>4</sub> ) <sub>2</sub> | -                                   | 75                                  | -                              | 92.5:7.5                       |
| 6                  | Mg(NTf) <sub>2</sub>               | no                                  | 92                                  | -                              | 90.5:9.5                       |
| 7                  | Et <sub>3</sub> N                  | 53                                  | no                                  | 86:14                          | -                              |
| 8                  | <sup>i</sup> Pr <sub>2</sub> NEt   | 45                                  | 32                                  | 82:16                          | 91.5:8.5                       |
| 9                  | DMAP                               | 44                                  | 35                                  | 82:16                          | 96:4                           |
| 10                 | DBACO                              | 76                                  | -                                   | 86:14                          | -                              |
| 11 <sup>c</sup>    | Et <sub>3</sub> N                  | 52                                  | -                                   | 70:30                          | -                              |

<sup>a</sup> Reaction conditions: Unless otherwise noted, all reactions were carried out with **1a** (0.10 mmol), **2a** (0.15mmol), **3a** (0.15 mmol), additive (0.005 mmol) and Mg(OTf)<sub>2</sub>/**L-RaPr**<sub>2</sub> (1.0:1.0, 10 mol %) in CH<sub>2</sub>ClCH<sub>2</sub>Cl (1.0 mL) at 30 °C for 3 h. <sup>b</sup> additive is 0.01 mmol. <sup>c</sup> The reaction was performed in CH<sub>2</sub>Cl<sub>2</sub> at -40 °C for 2days and -20 °C for 3 days. no= not detect

**Supplementary Discussion 6.** Excess metal salts play a role in accelerating the production of products. Excess **L-RaPr**<sub>2</sub> plays similar roles to base, but the enantioselectivity decreases when the temperature decreases to Et<sub>3</sub>N.

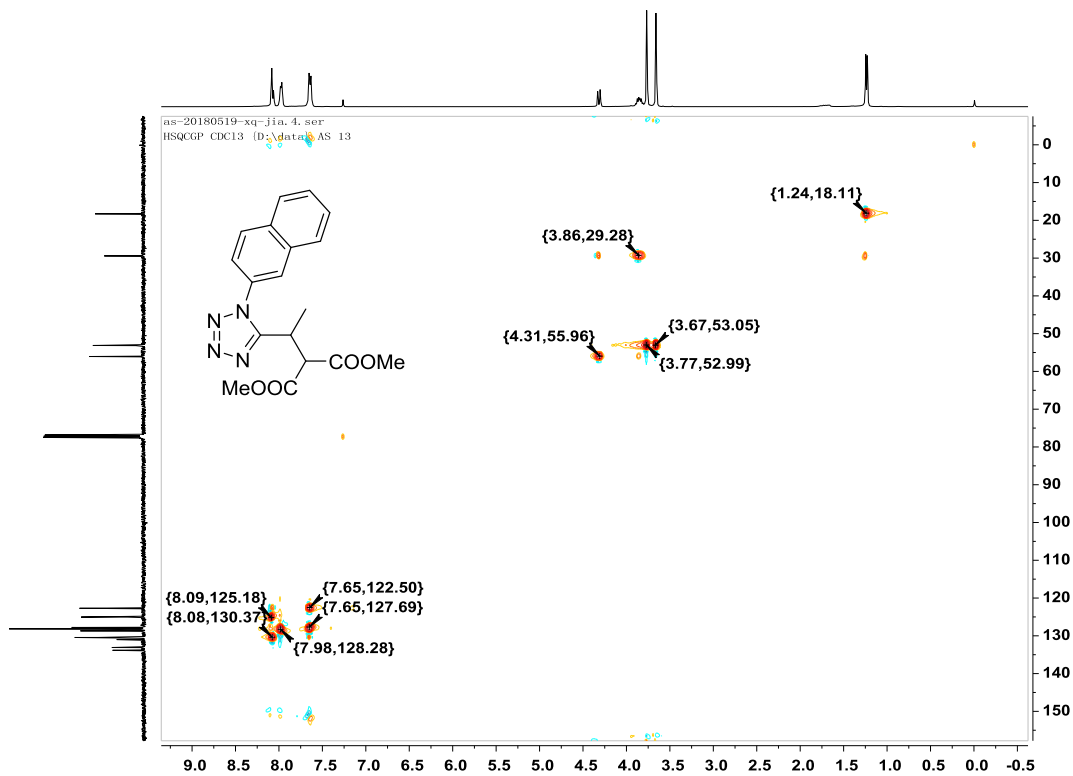

Supplementary Figure 19. HSQC of 4k

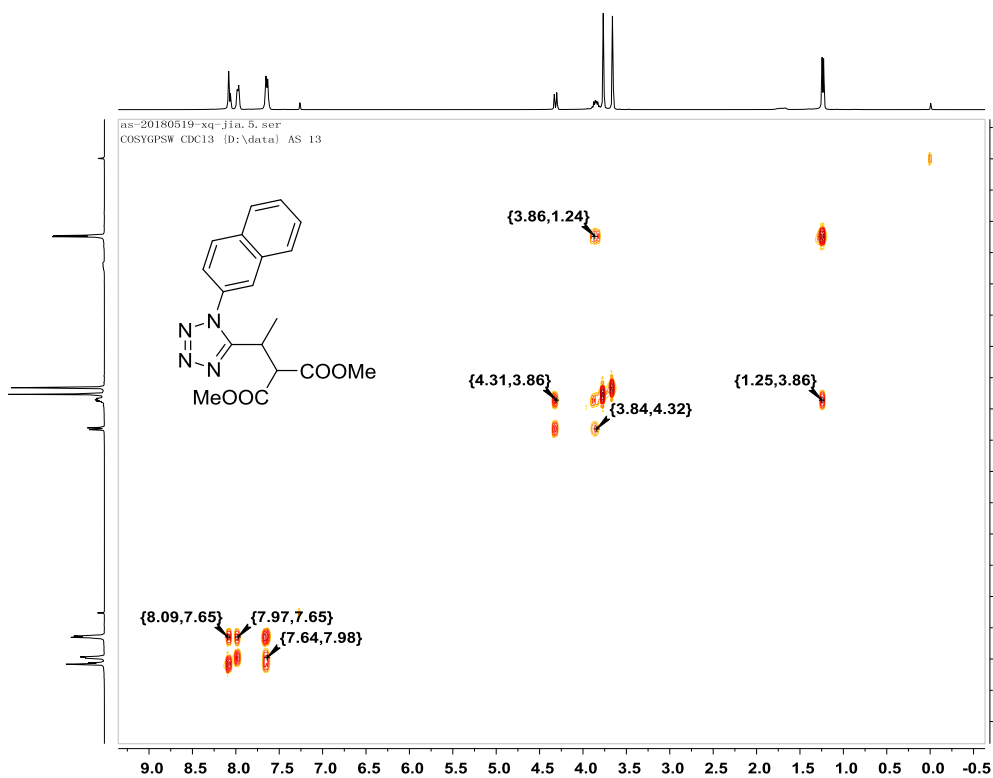

Supplementary Figure 20. COSY of 4k

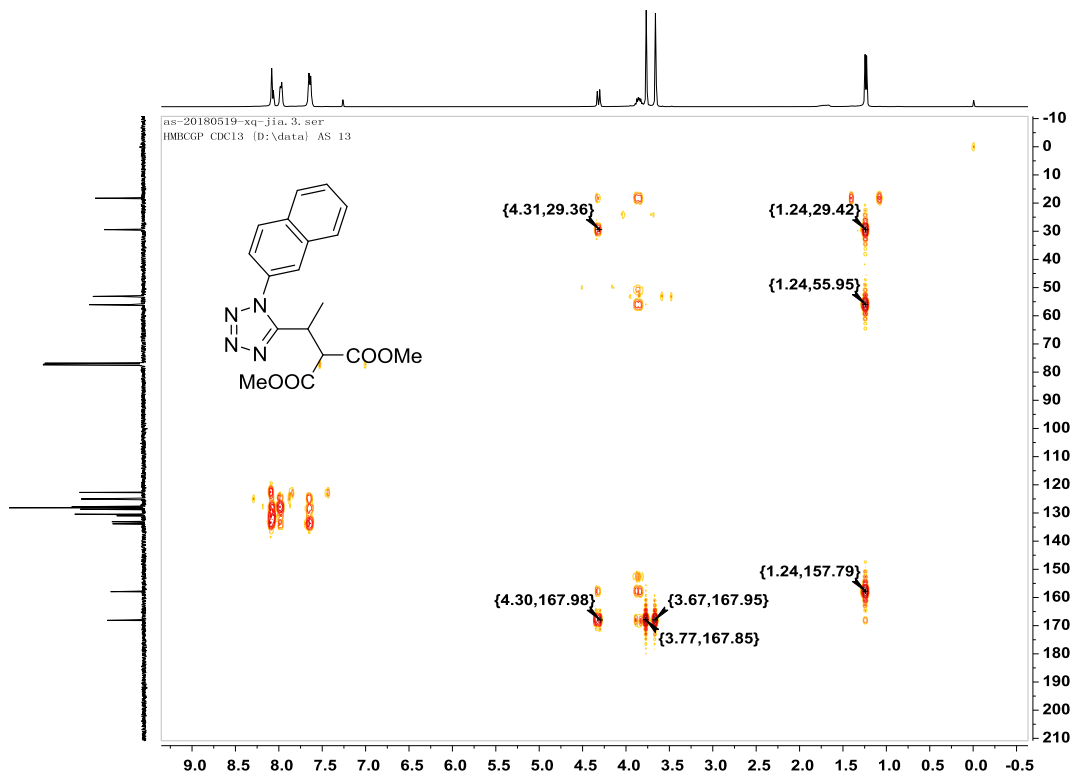

Supplementary Figure 21. HMBCGP of 4k

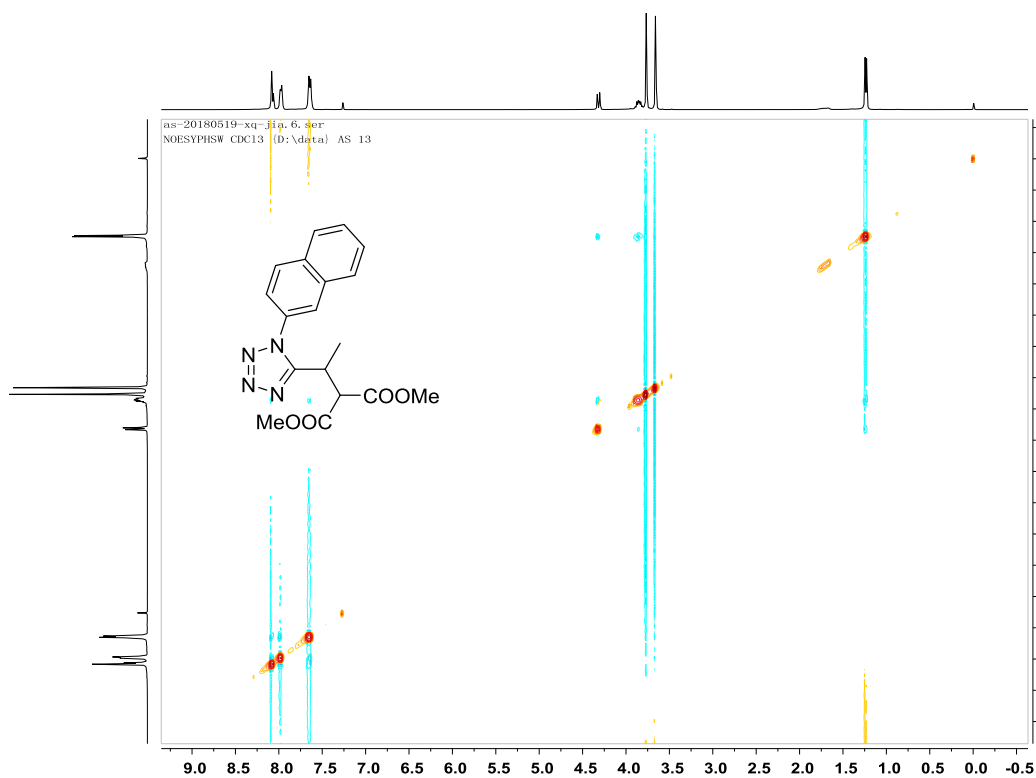

Supplementary Figure 22. NOESYPSW of 4k

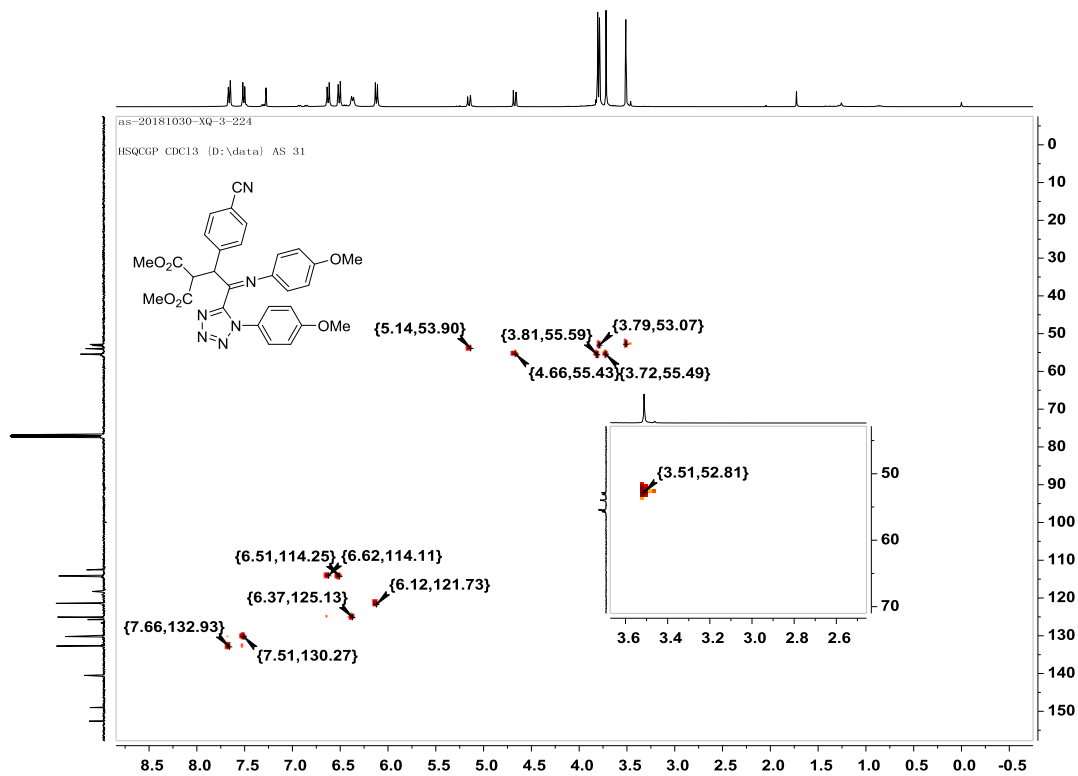

Supplementary Figure 23. HSQC of 5x

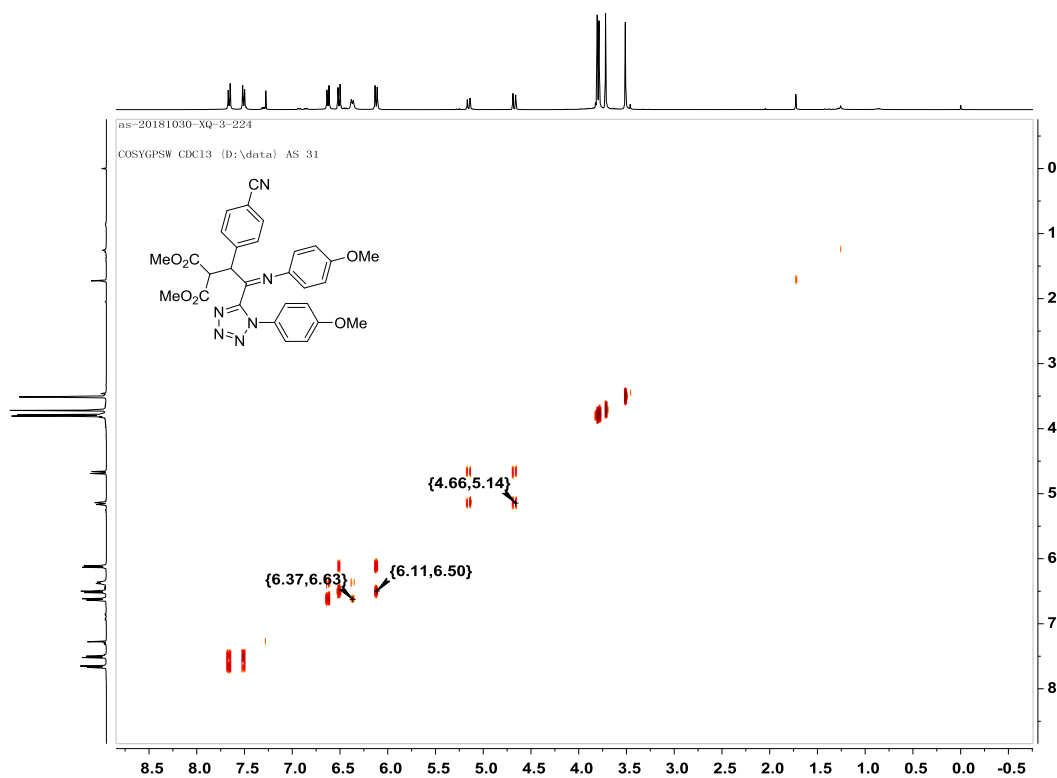

Supplementary Figure 24. COSY of 5x

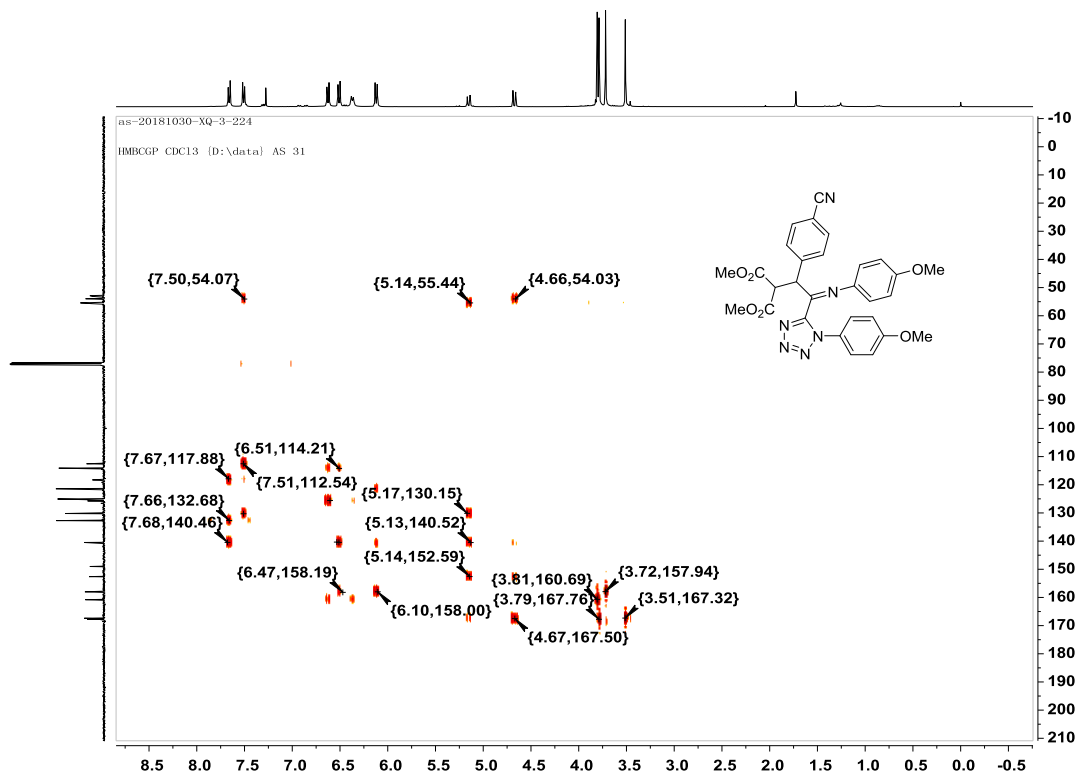

Supplementary Figure 25. HMBMGP of 5x

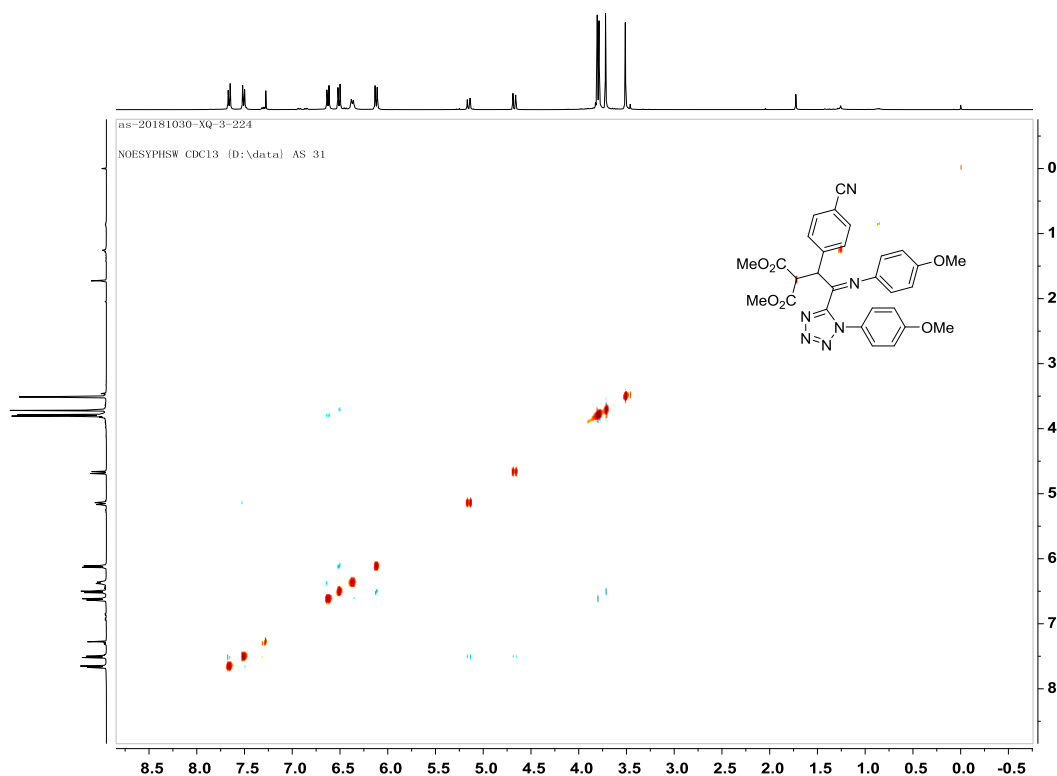

Supplementary Figure 26. NOESYPSW of 5x

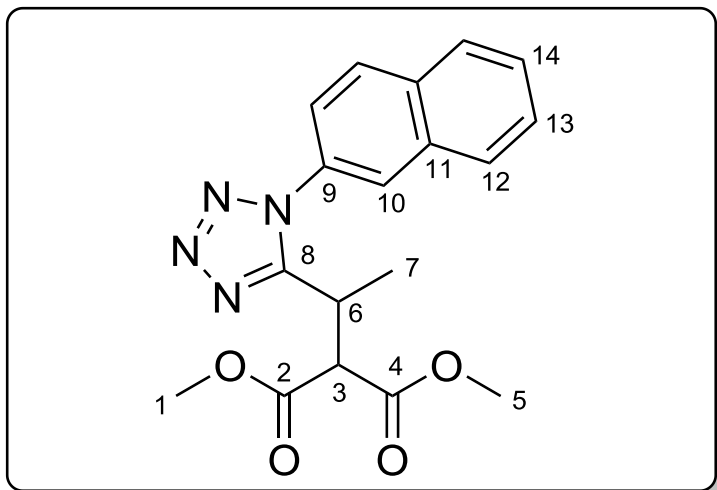

|                |                |
|----------------|----------------|
| 1: 3.77, 53.0; | 2: 168.0;      |
| 3: 4.31, 56.0; | 4: 167.9;      |
| 5: 3.67, 53.1; | 6: 3.86, 29.3; |
| 7: 1.24, 18.1; | 8: 157.8;      |

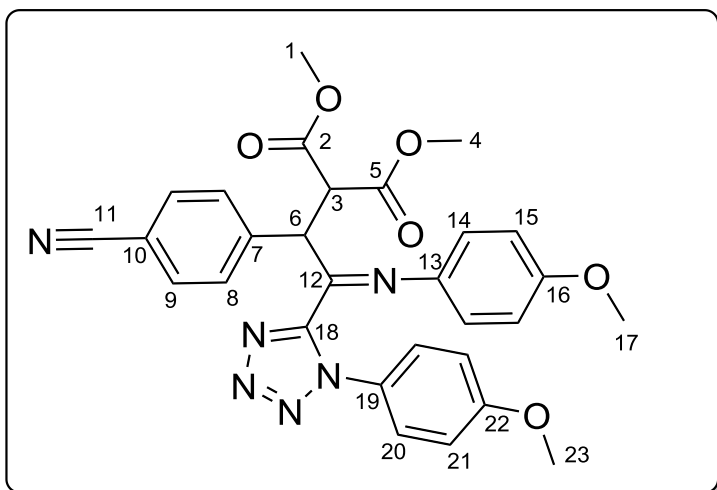

|                  |                  |
|------------------|------------------|
| 1: 3.77, 53.0;   | 2: 167.7;        |
| 3: 4.66, 55.4;   | 4: 3.50, 52.8;   |
| 5: 167.3;        | 6: 5.14, 53.9;   |
| 7: 140.3;        | 8: 7.49, 130.1;  |
| 9: 7.64, 132.6;  | 10: 112.5;       |
| 11: 118.4;       | 12: 148.9;       |
| 13: 140.4;       | 14: 6.10, 121.3; |
| 15: 6.50, 114.1; | 16: 157.9;       |
| 17: 3.70, 55.4;  | 18: 152.6;       |
| 19: 125.7;       | 20: 6.35, 125.0; |
| 21: 6.61, 114.0; | 22: 160.7;       |
| 23: 3.79, 55.6;  |                  |



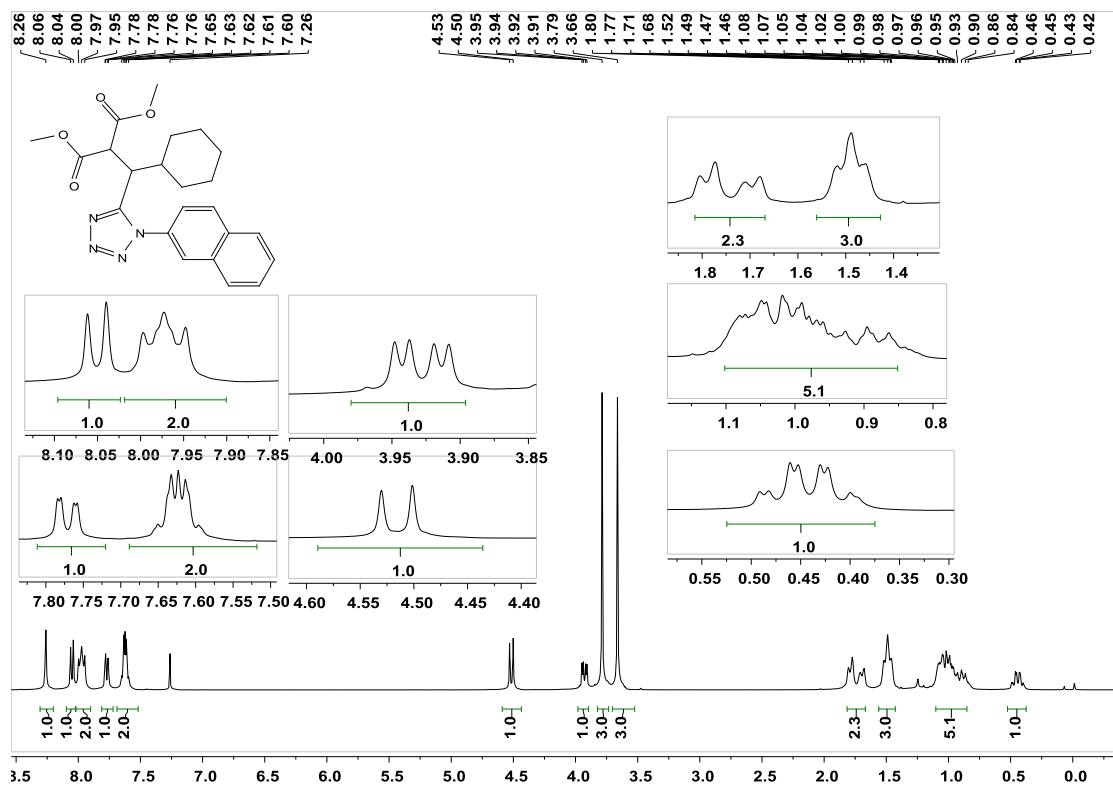

**Supplementary Figure 27.**  $^1\text{H}$  NMR spectra for product **4a**

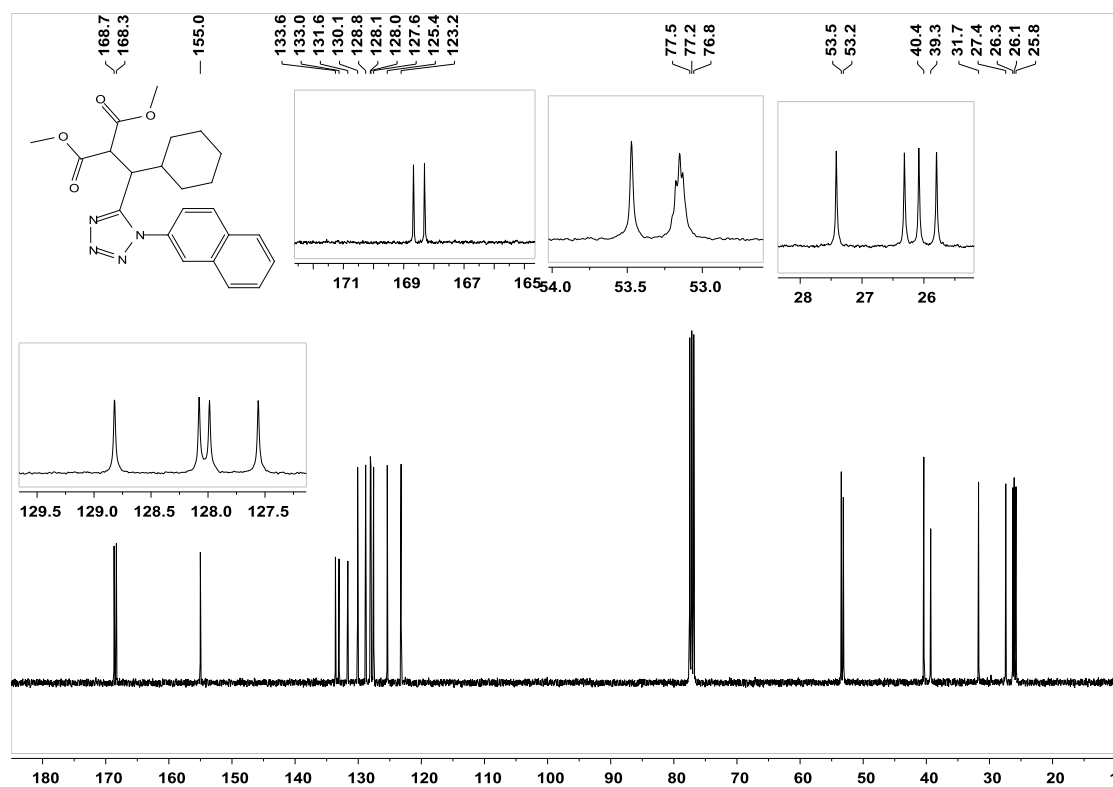

**Supplementary Figure 28.**  $^{13}\text{C}$  NMR spectra for product **4a**

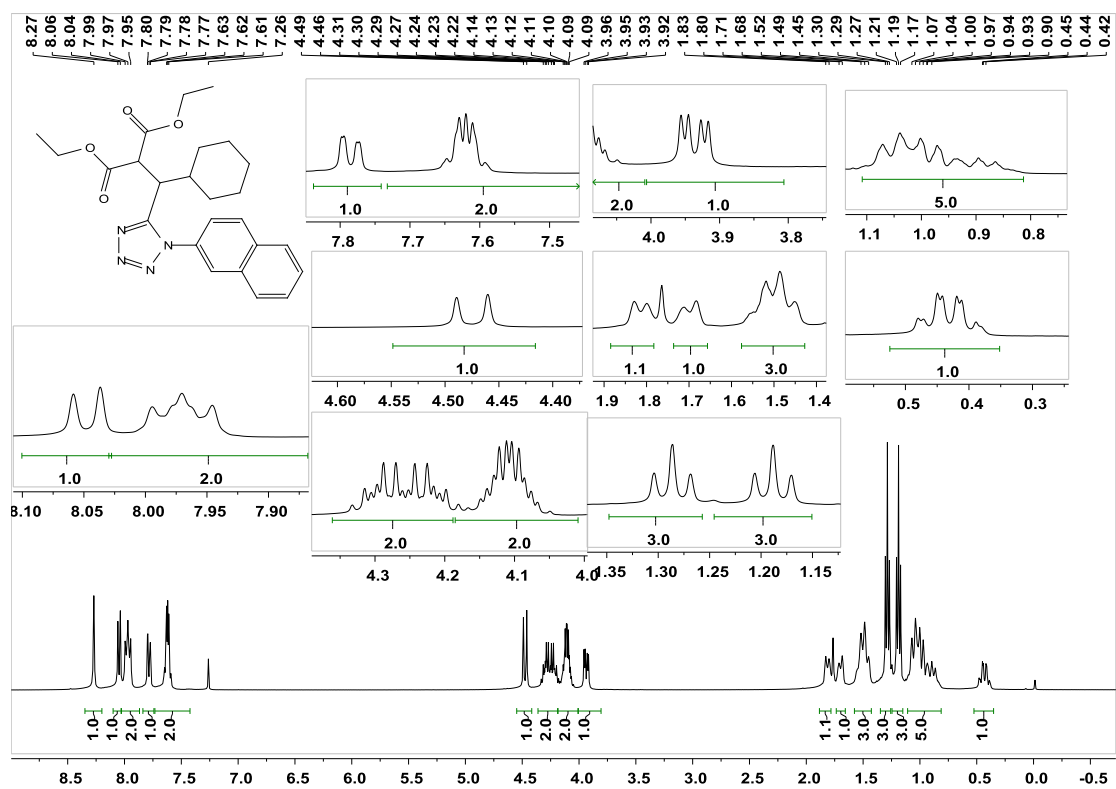

Supplementary Figure 29. <sup>1</sup>H NMR spectra for product 4b

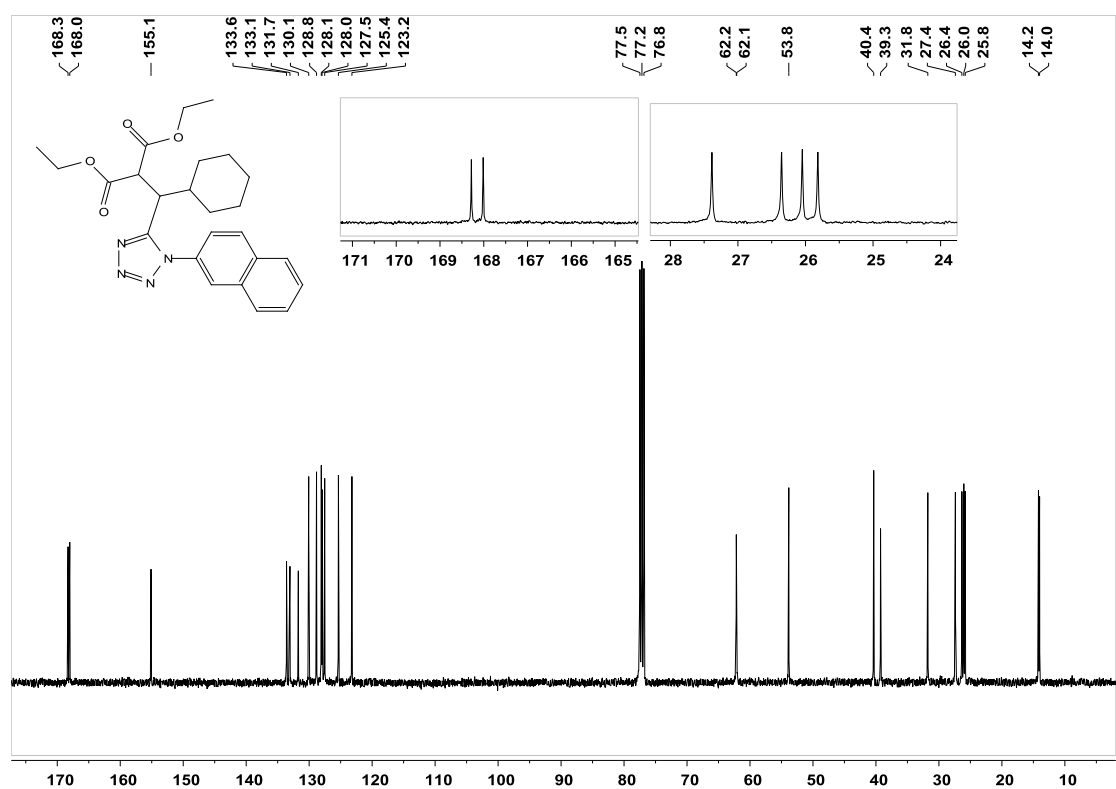

Supplementary Figure 30. <sup>13</sup>C NMR spectra for product 4b

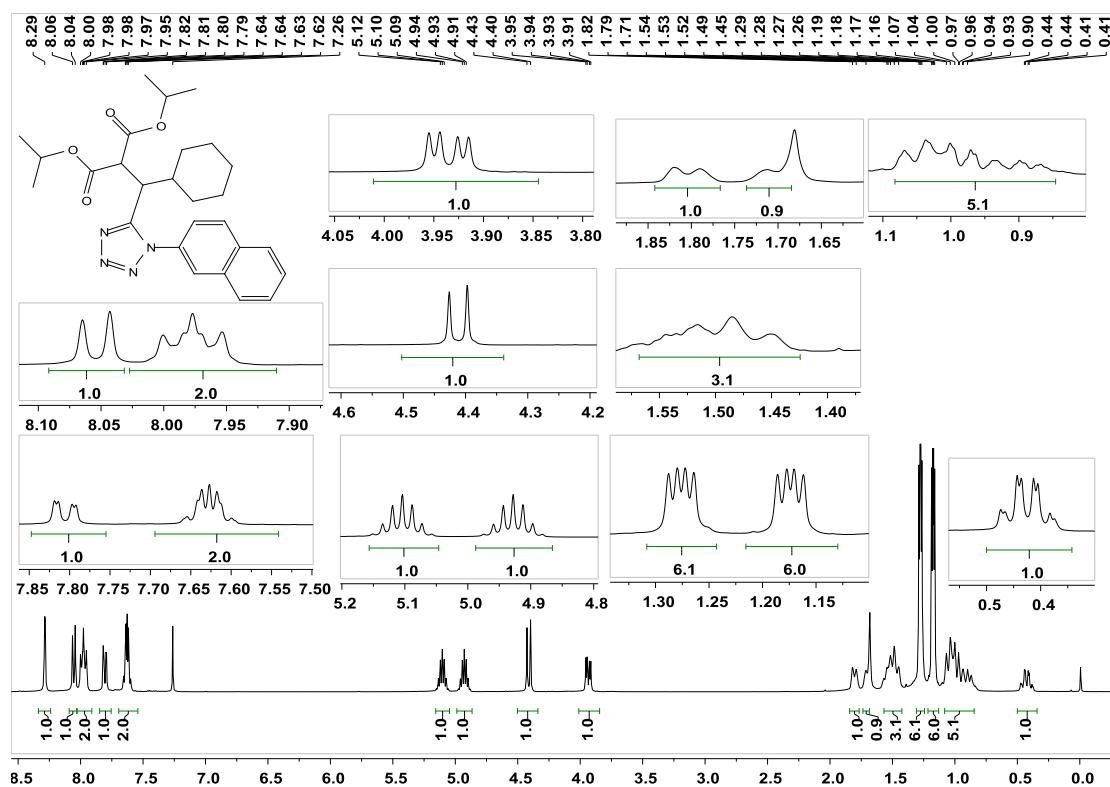

**Supplementary Figure 31.** <sup>1</sup>H NMR spectra for product **4c**

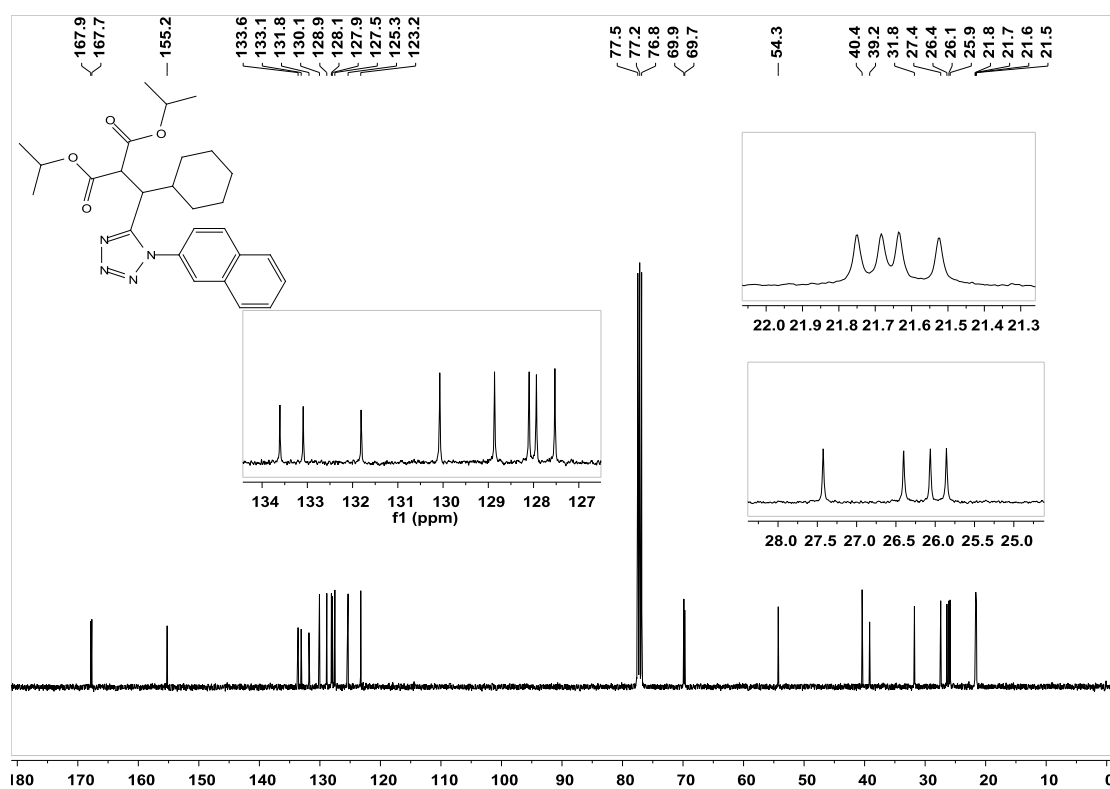

**Supplementary Figure 32.** <sup>13</sup>C NMR spectra for product **4c**

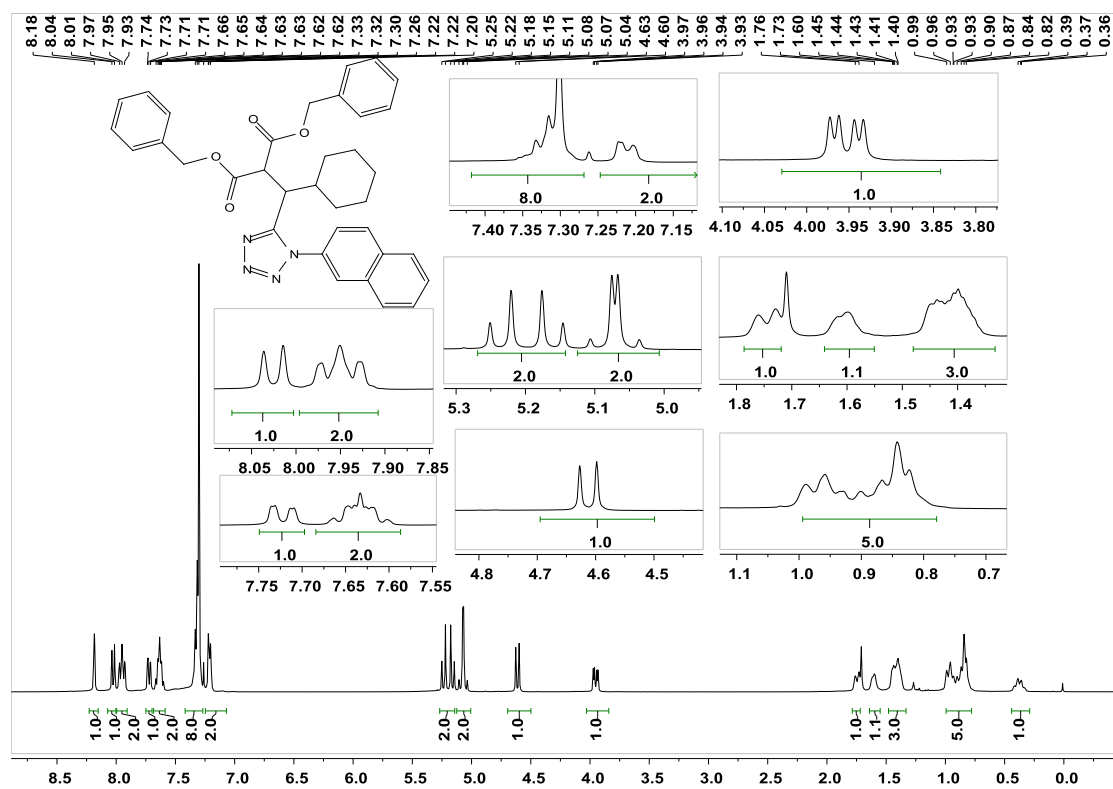

Supplementary Figure 33. <sup>1</sup>H NMR spectra for product **4d**

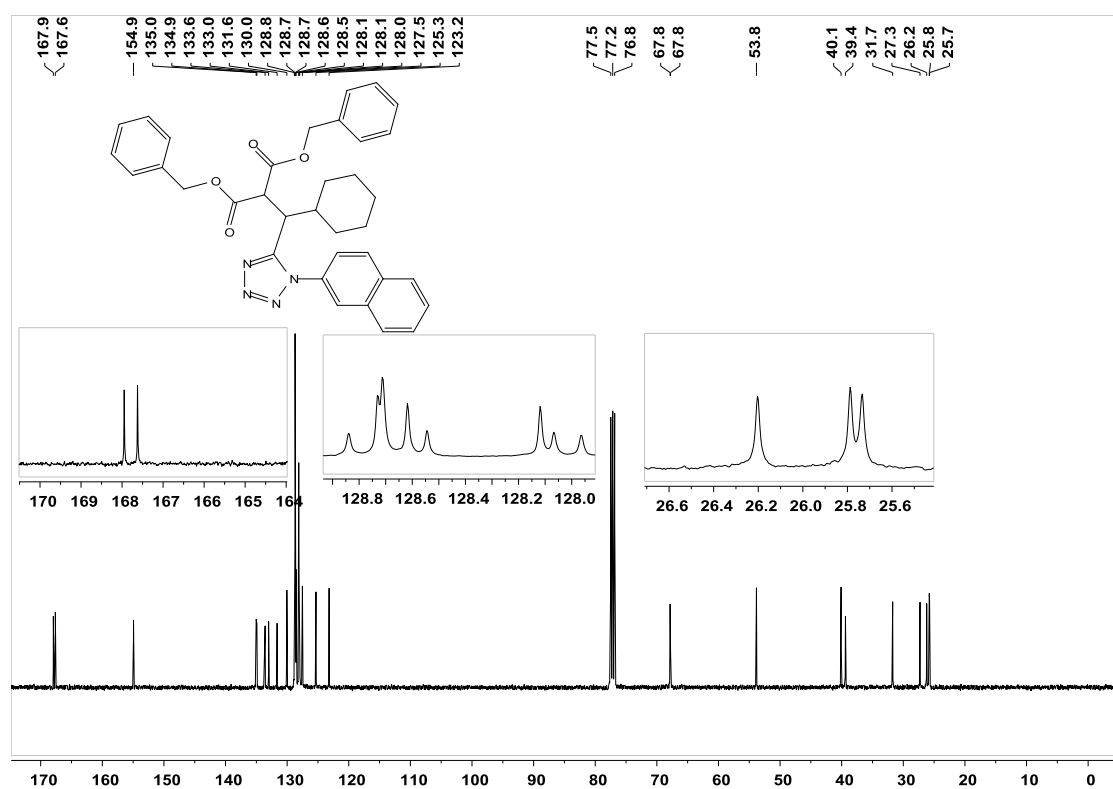

Supplementary Figure 34. <sup>13</sup>C NMR spectra for product **4d**

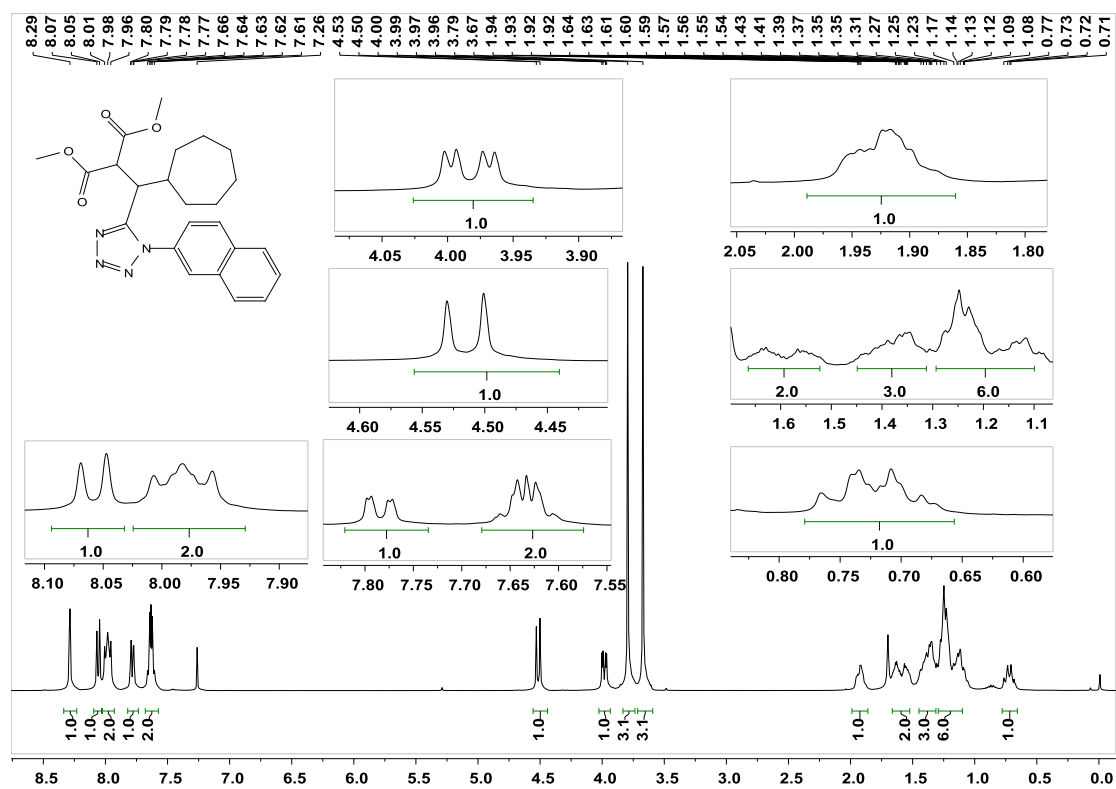

**Supplementary Figure 35.**  $^1\text{H}$  NMR spectra for product **4e**

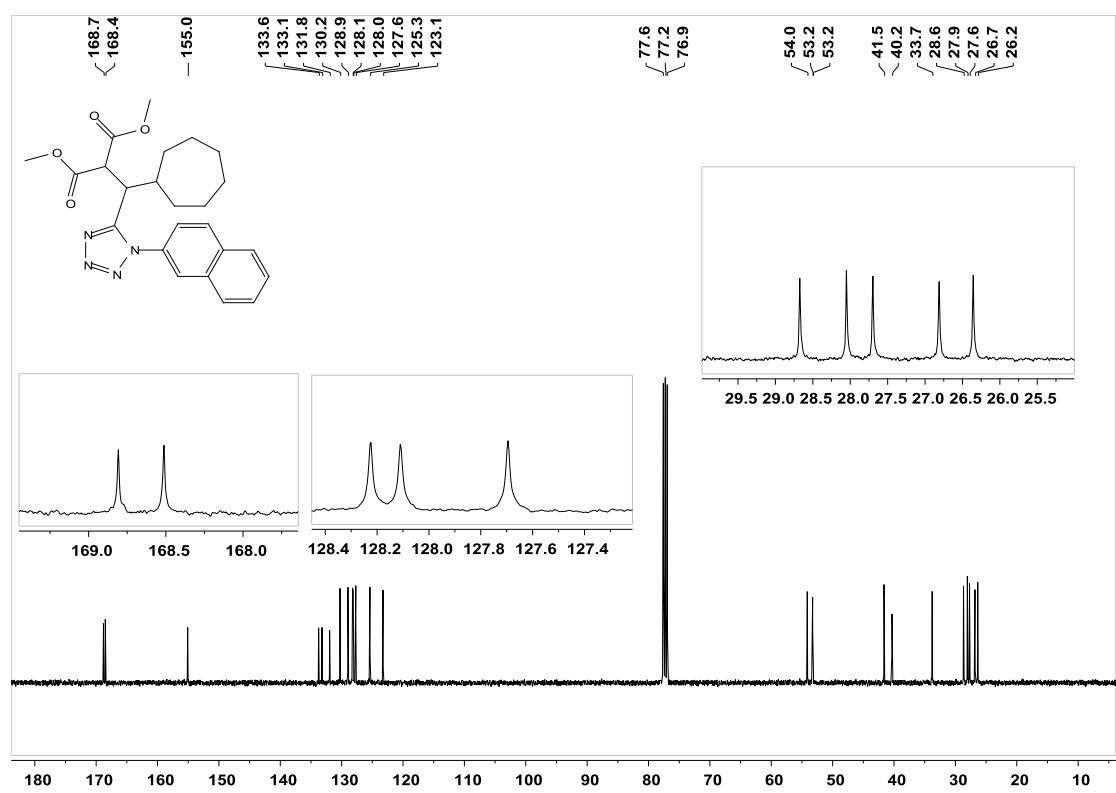

**Supplementary Figure 36.**  $^{13}\text{C}$  NMR spectra for product **4e**

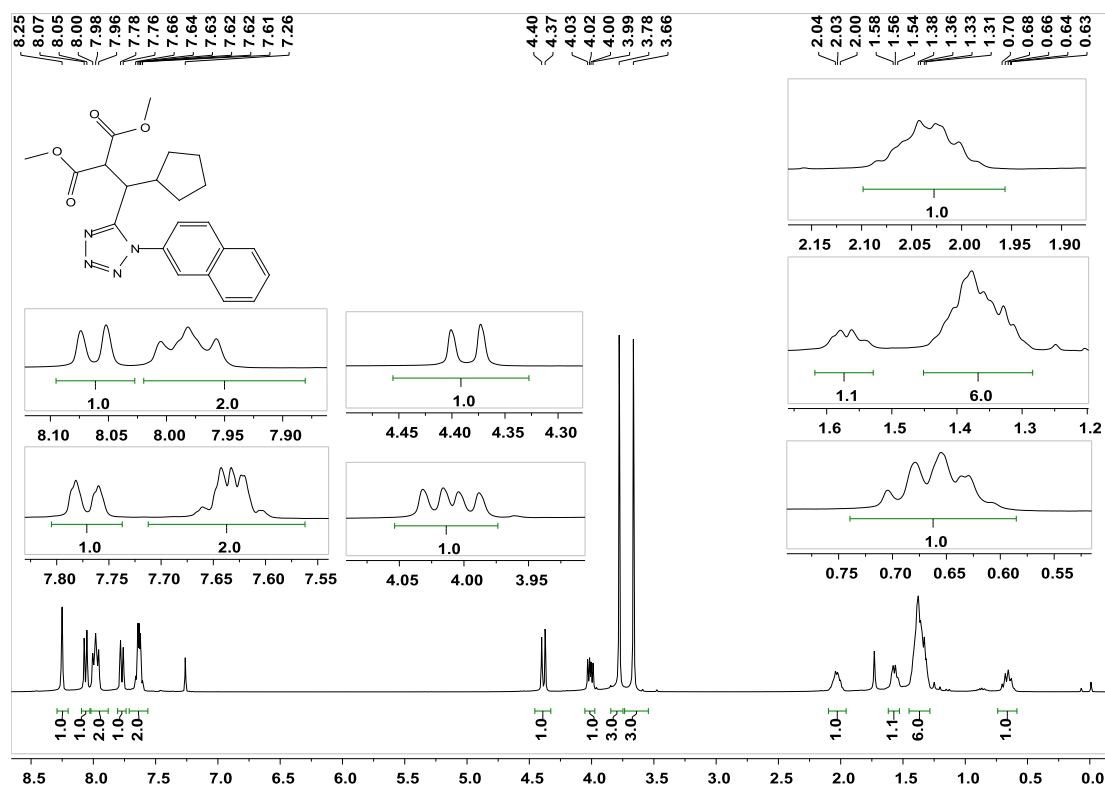

Supplementary Figure 37. <sup>1</sup>H NMR spectra for product 4f

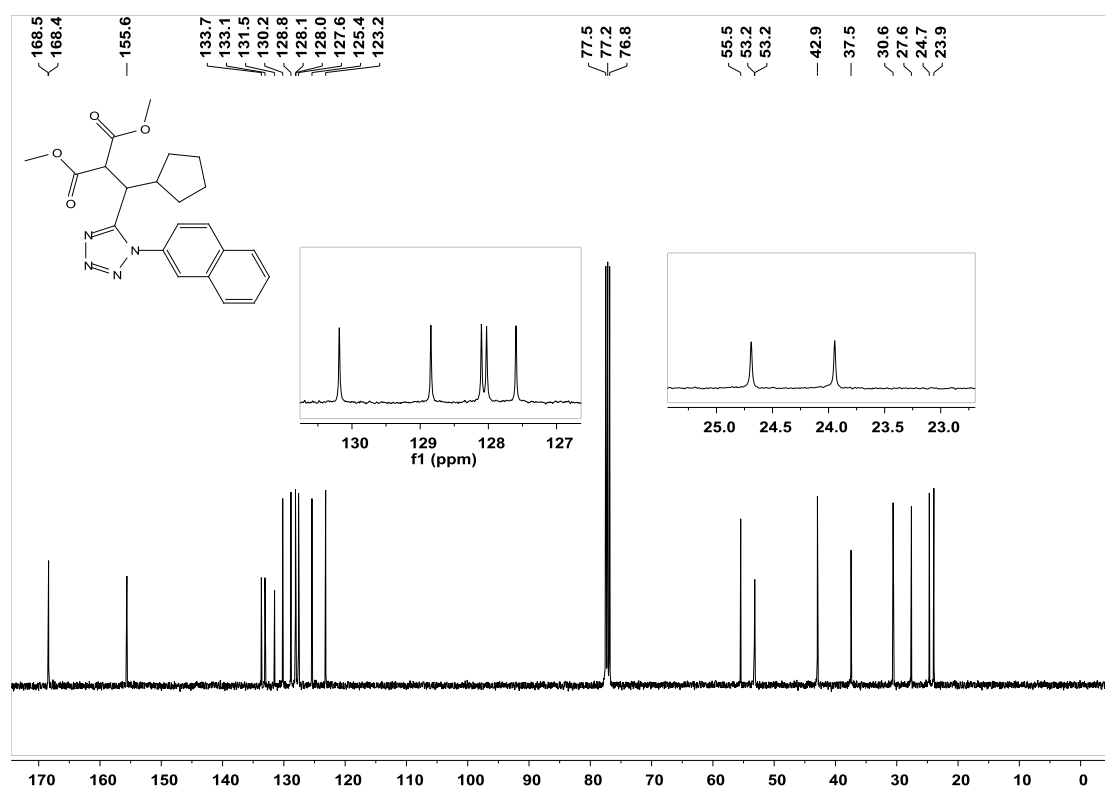

Supplementary Figure 38. <sup>13</sup>C NMR spectra for product 4f

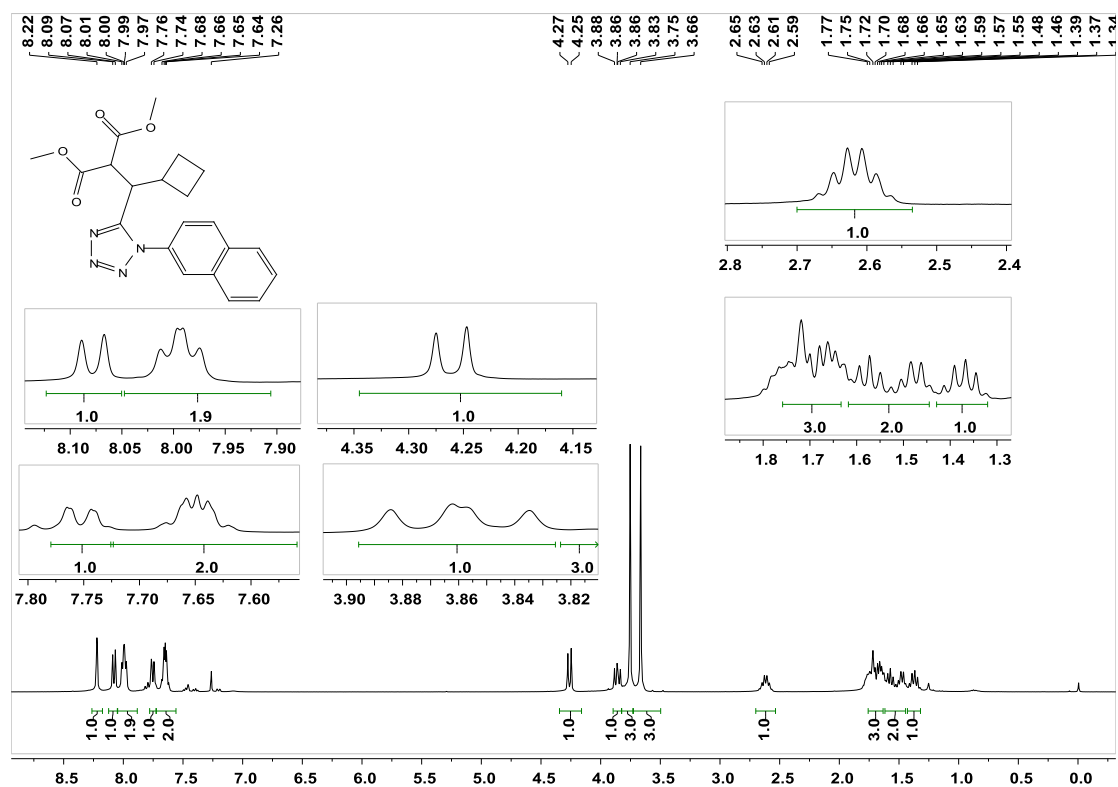

Supplementary Figure 39. <sup>1</sup>H NMR spectra for product 4g

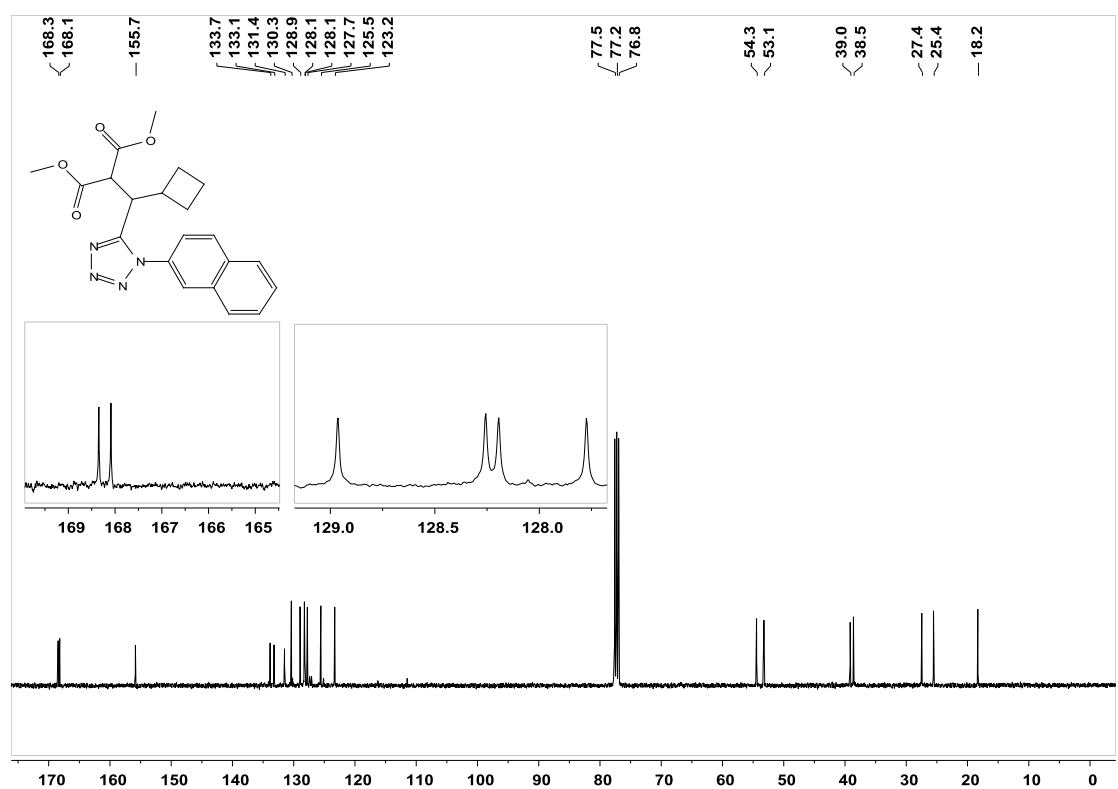

Supplementary Figure 40. <sup>13</sup>C NMR spectra for product 4g

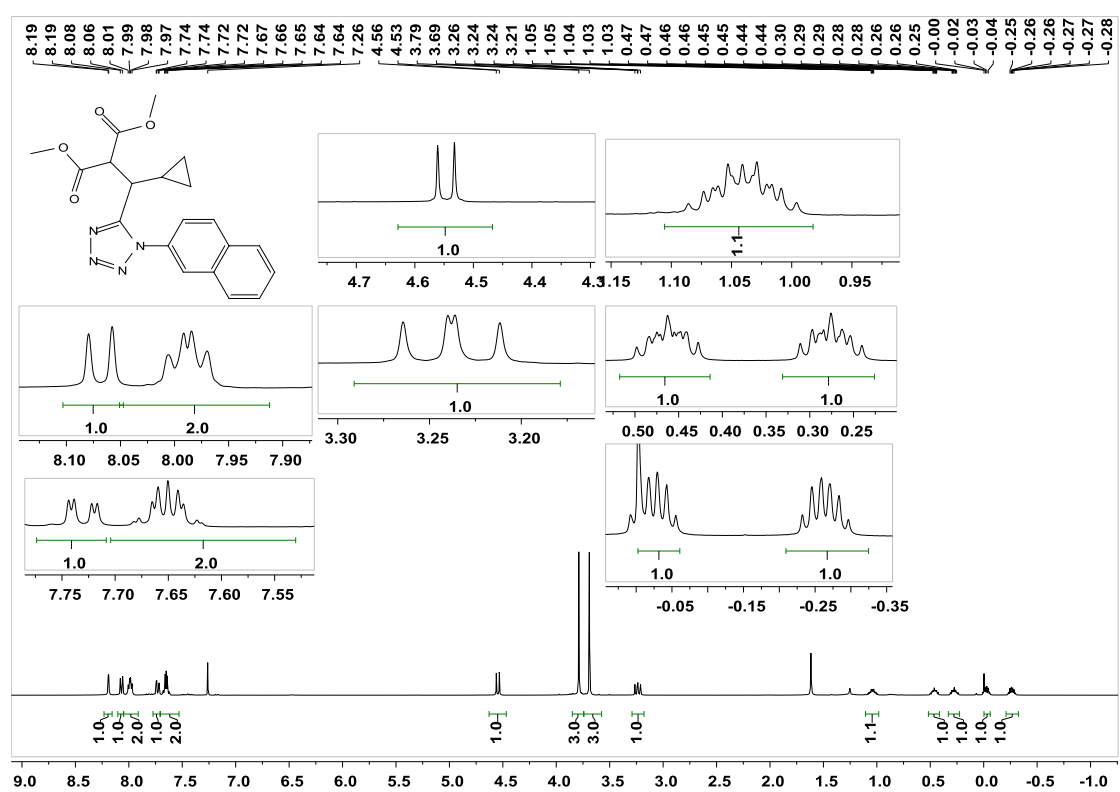

Supplementary Figure 41.  $^1\text{H}$  NMR spectra for product **4h**

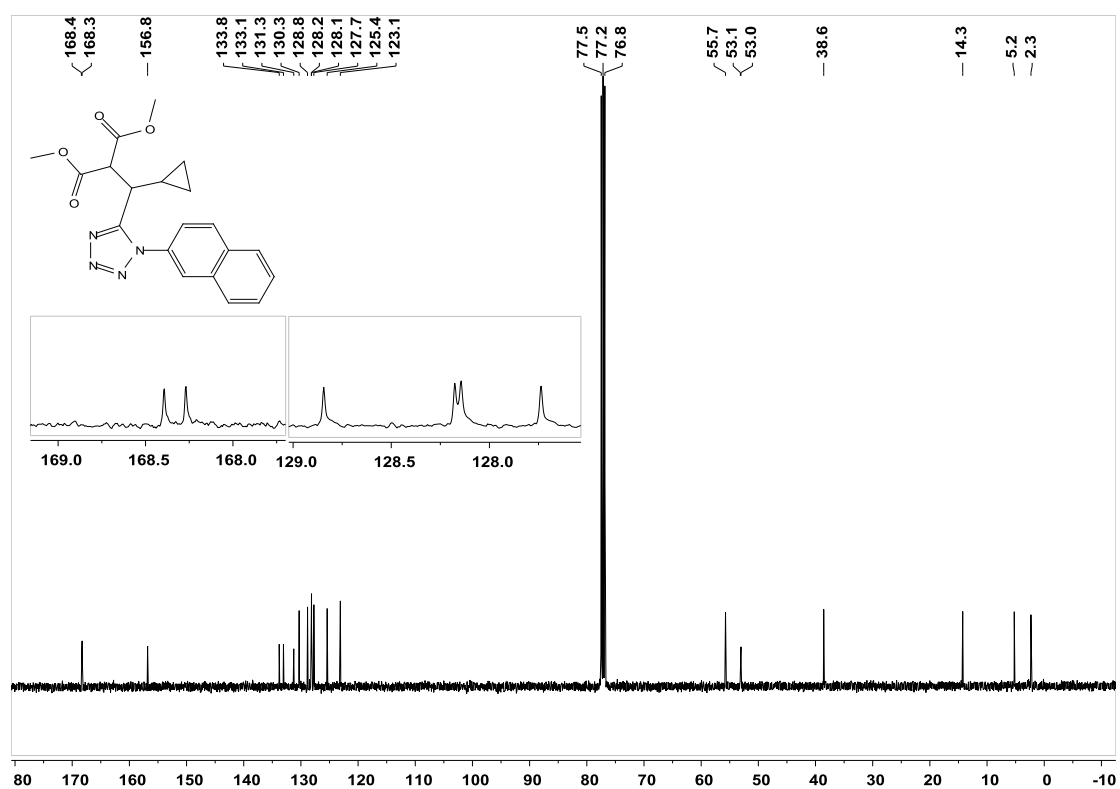

Supplementary Figure 42.  $^{13}\text{C}$  NMR spectra for product **4h**



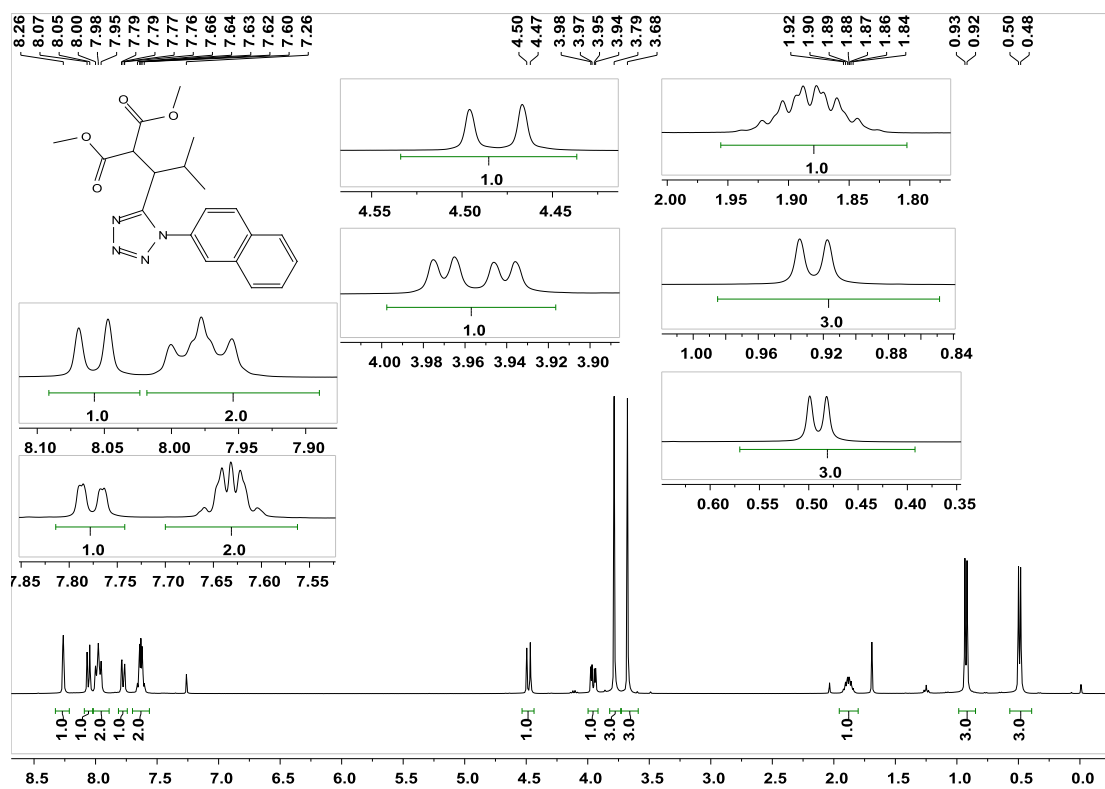

**Supplementary Figure 43.  $^1\text{H}$  NMR spectra for product **4i****

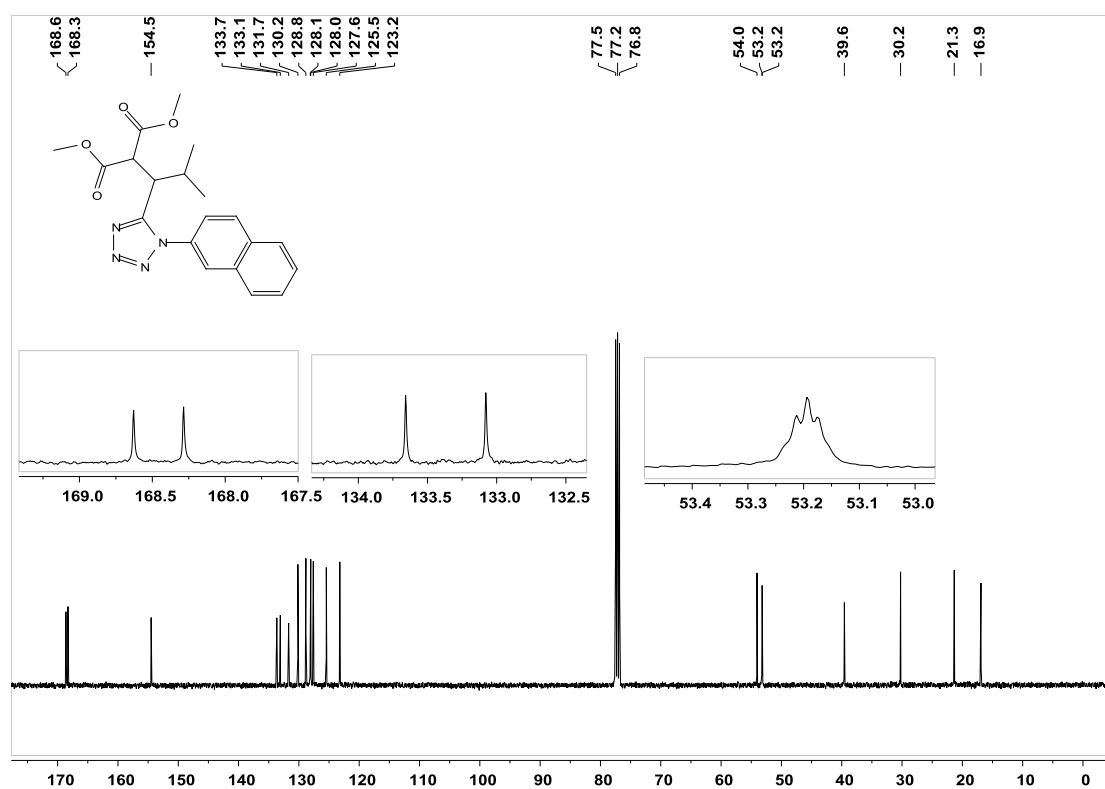

**Supplementary Figure 44.  $^{13}\text{C}$  NMR spectra for product **4i****

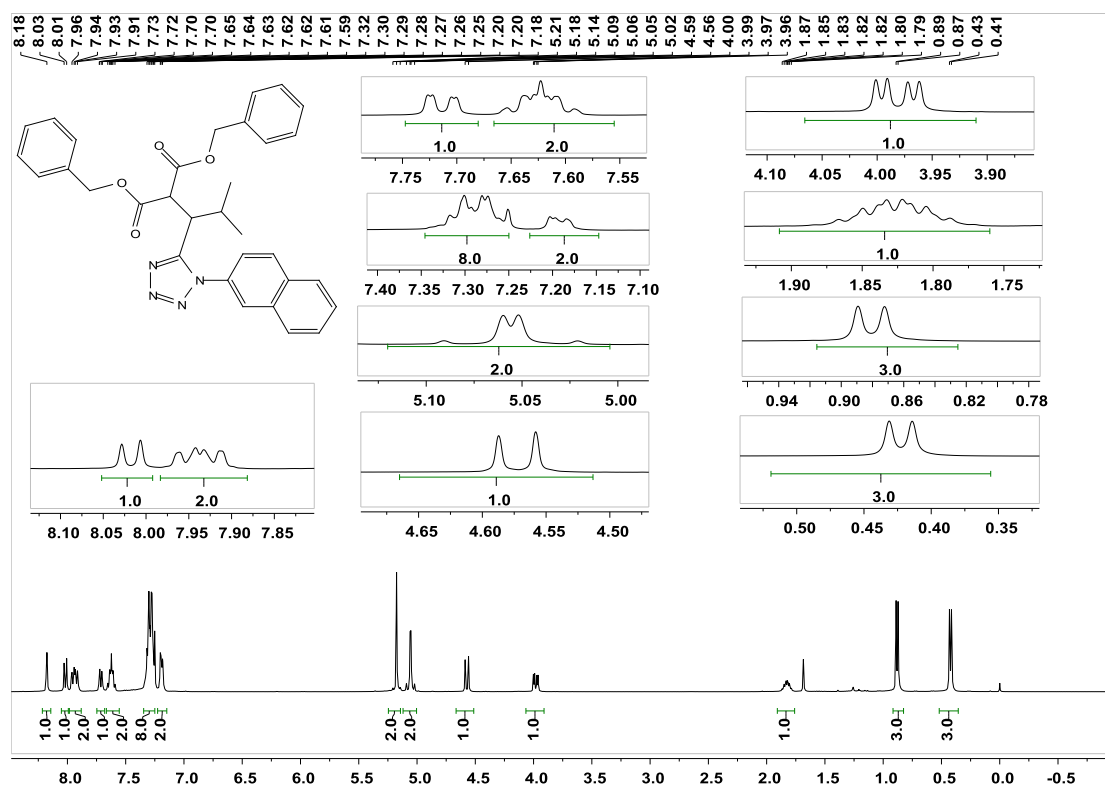

**Supplementary Figure 45.**  $^1\text{H}$  NMR spectra for product **4j**

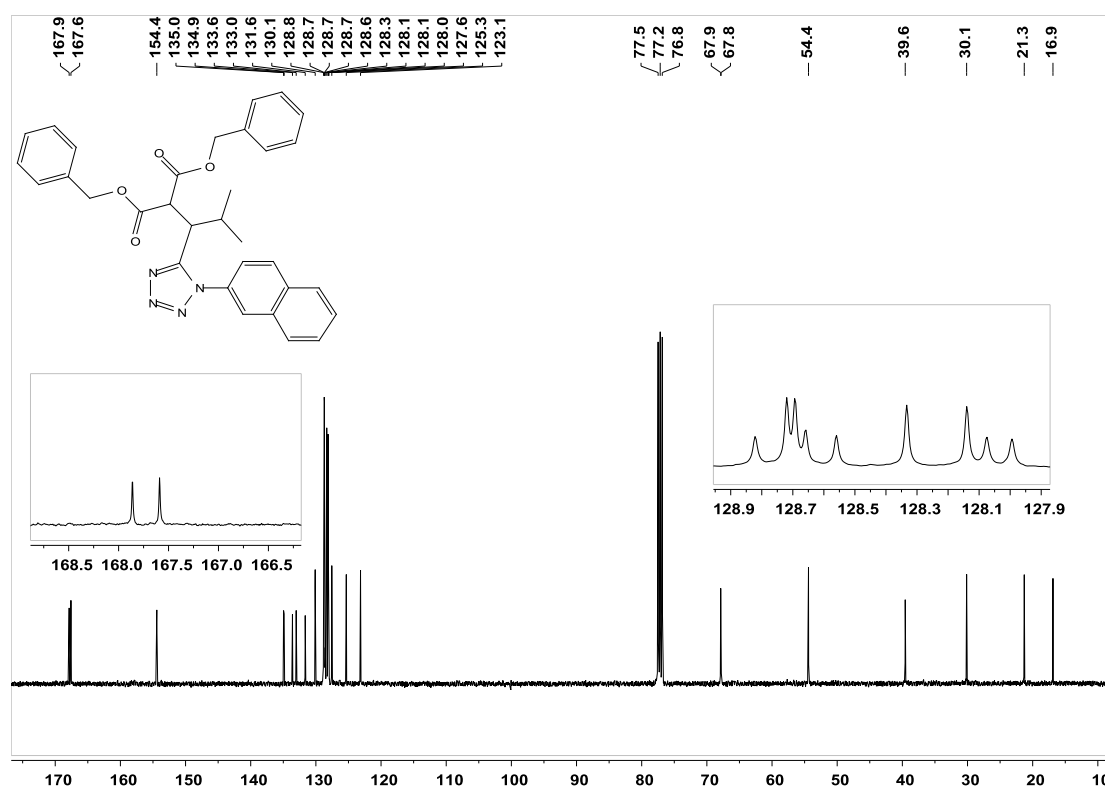

**Supplementary Figure 46.**  $^{13}\text{C}$  NMR spectra for product **4j**

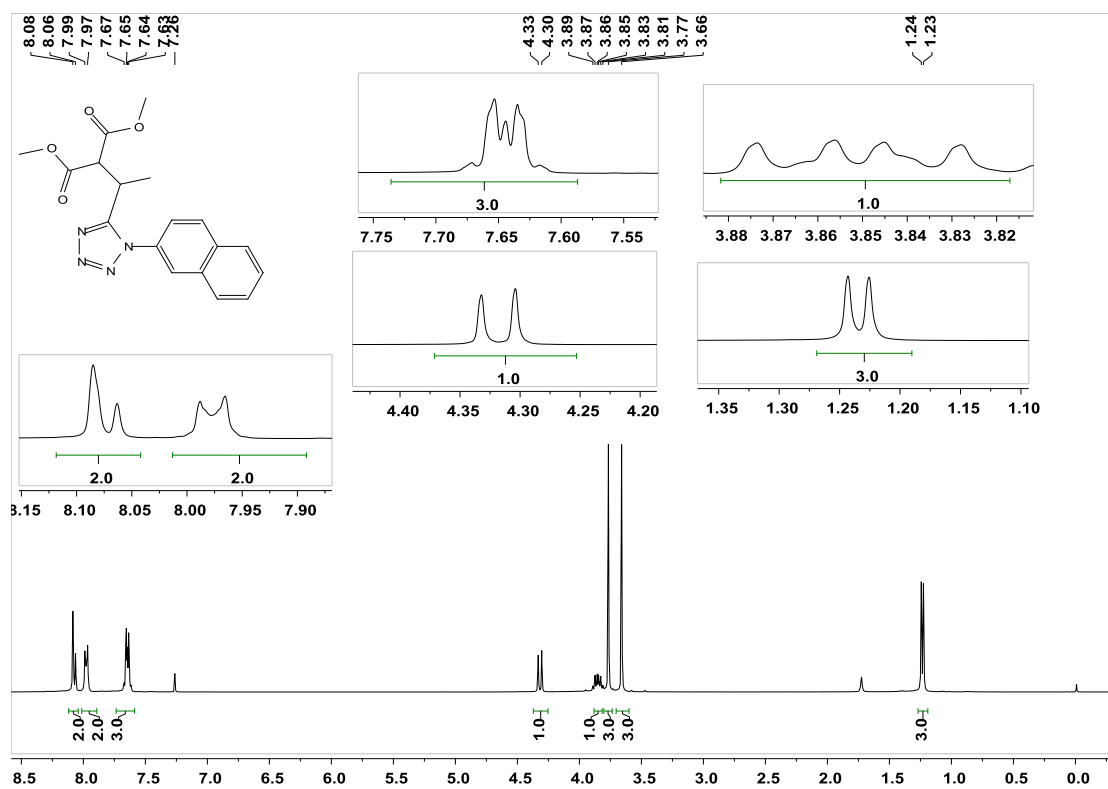

Supplementary Figure 47.  $^1\text{H}$  NMR spectra for product **4k**

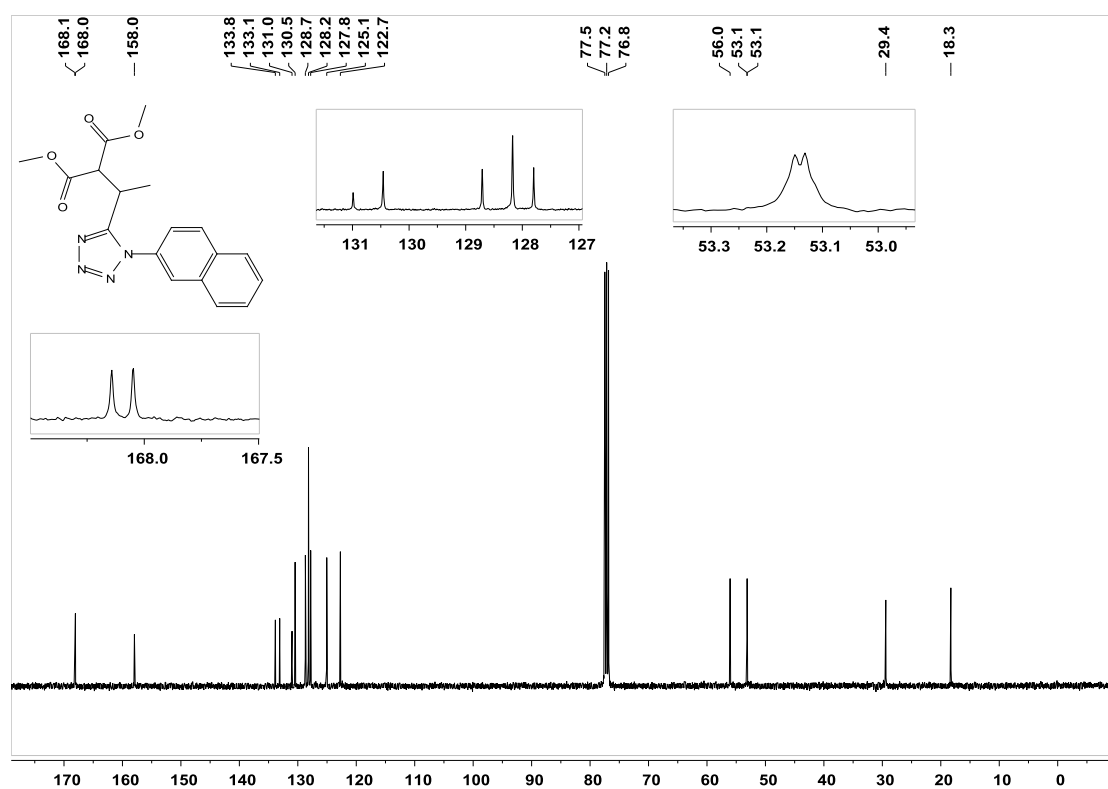

Supplementary Figure 48.  $^{13}\text{C}$  NMR spectra for product **4k**

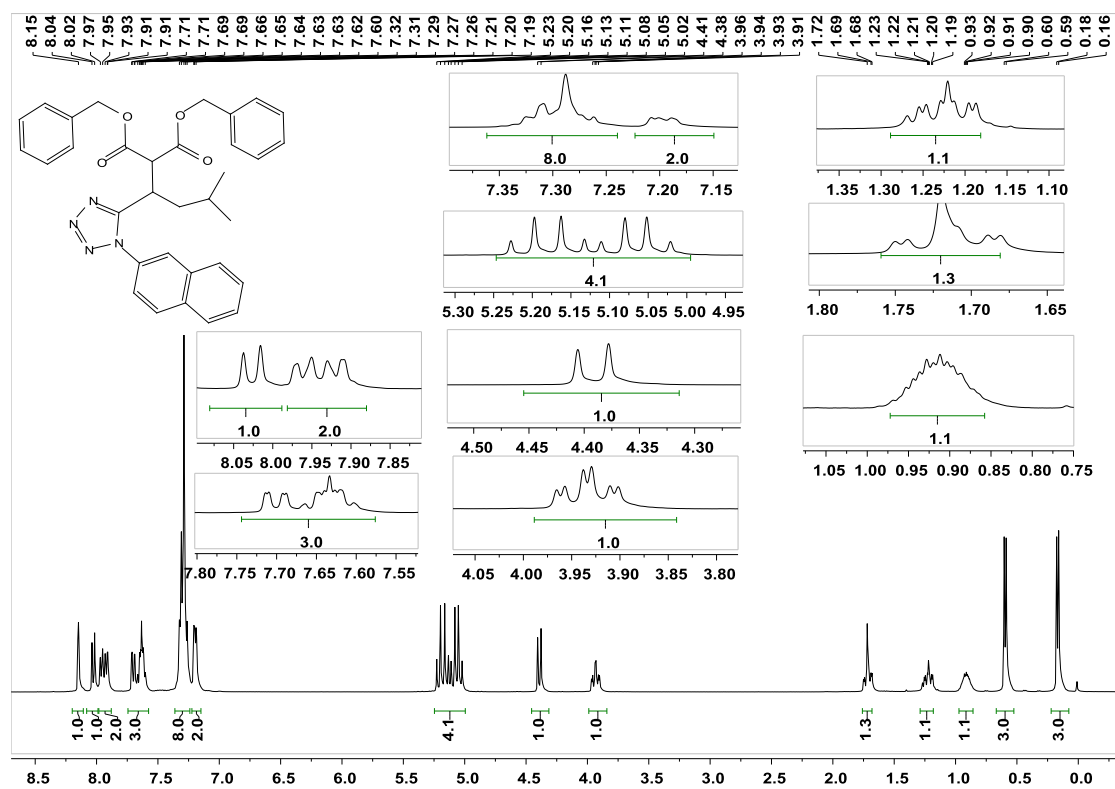

Supplementary Figure 49.  $^1\text{H}$  NMR spectra for product **4l**

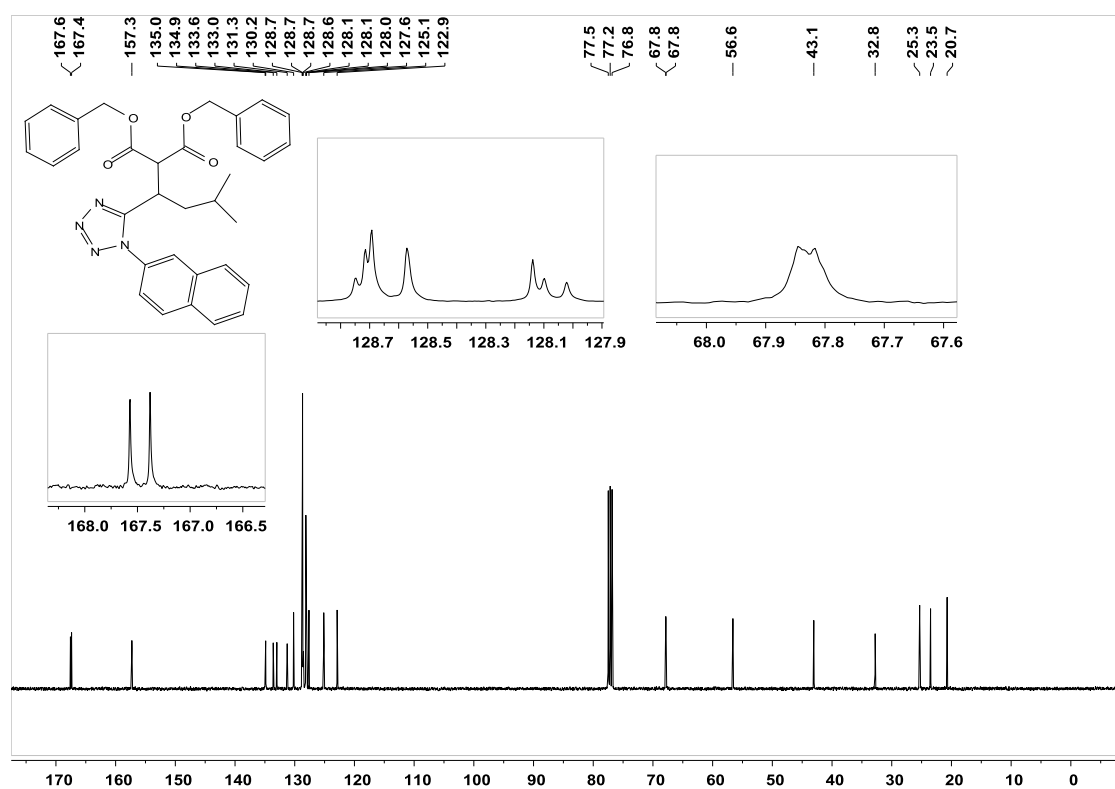

Supplementary Figure 50.  $^{13}\text{C}$  NMR spectra for product **4l**

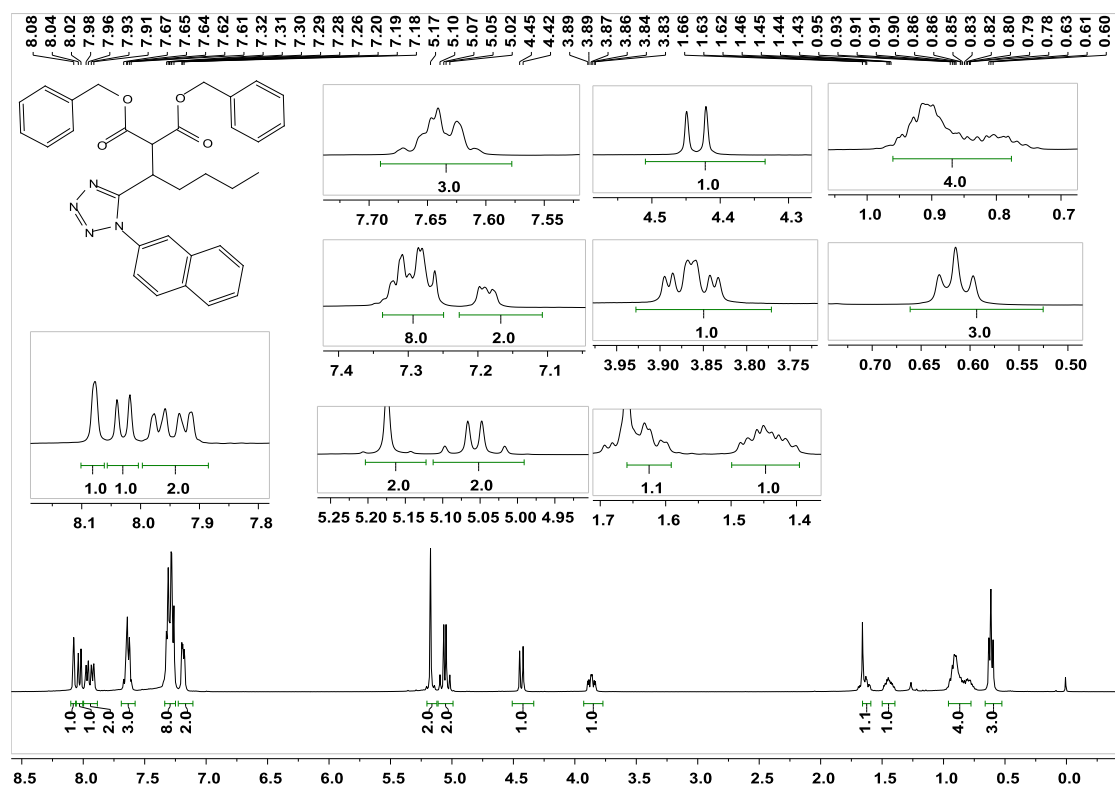

Supplementary Figure 51.  $^1\text{H}$  NMR spectra for product **4m**

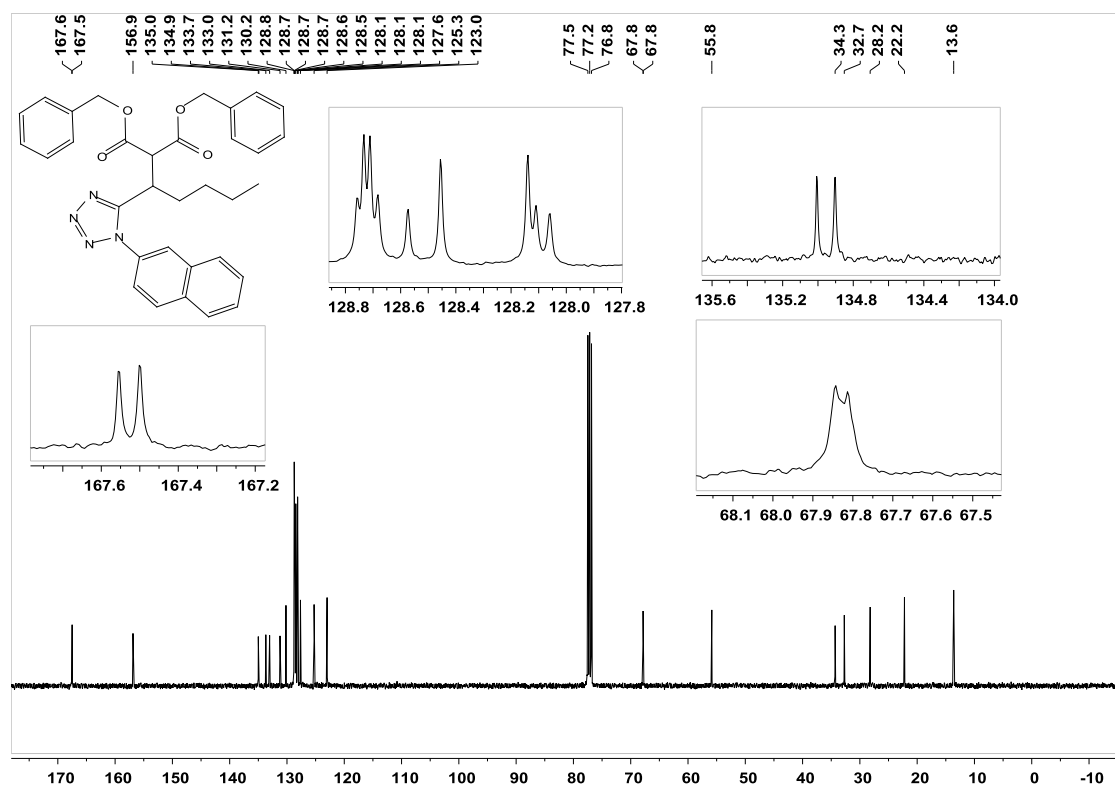

Supplementary Figure 52.  $^{13}\text{C}$  NMR spectra for product **4m**

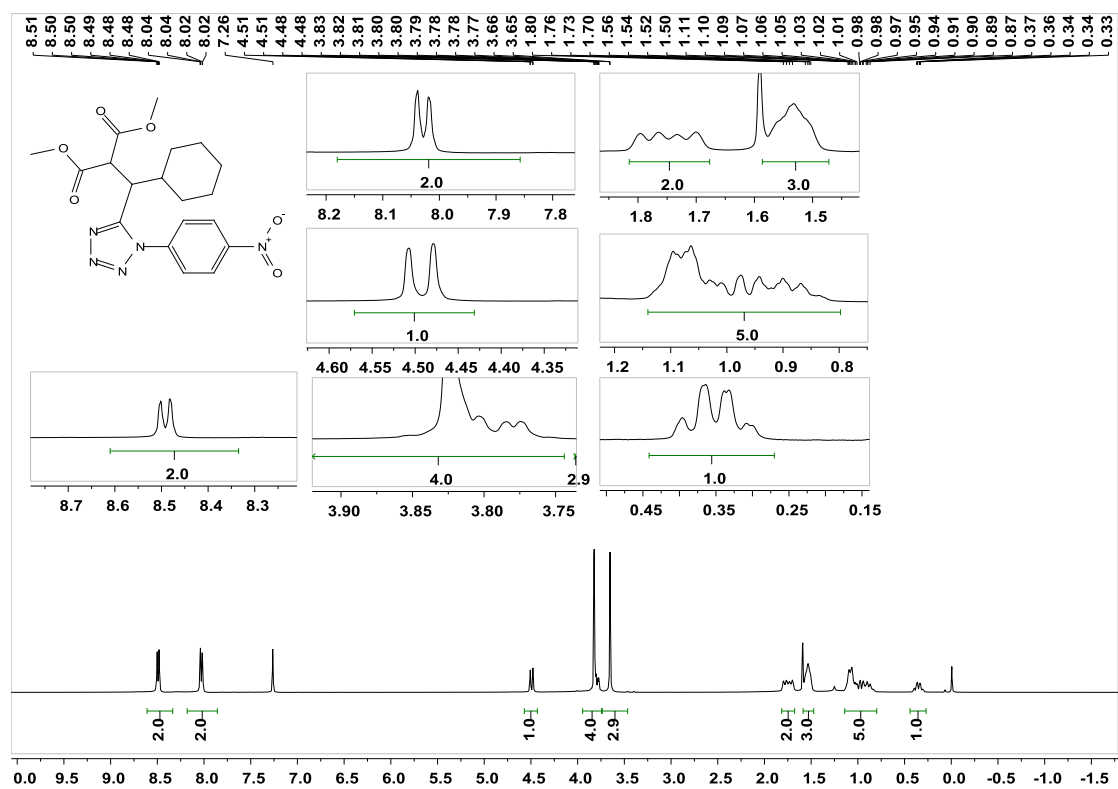

Supplementary Figure 53.  $^1\text{H}$  NMR spectra for product **4n**

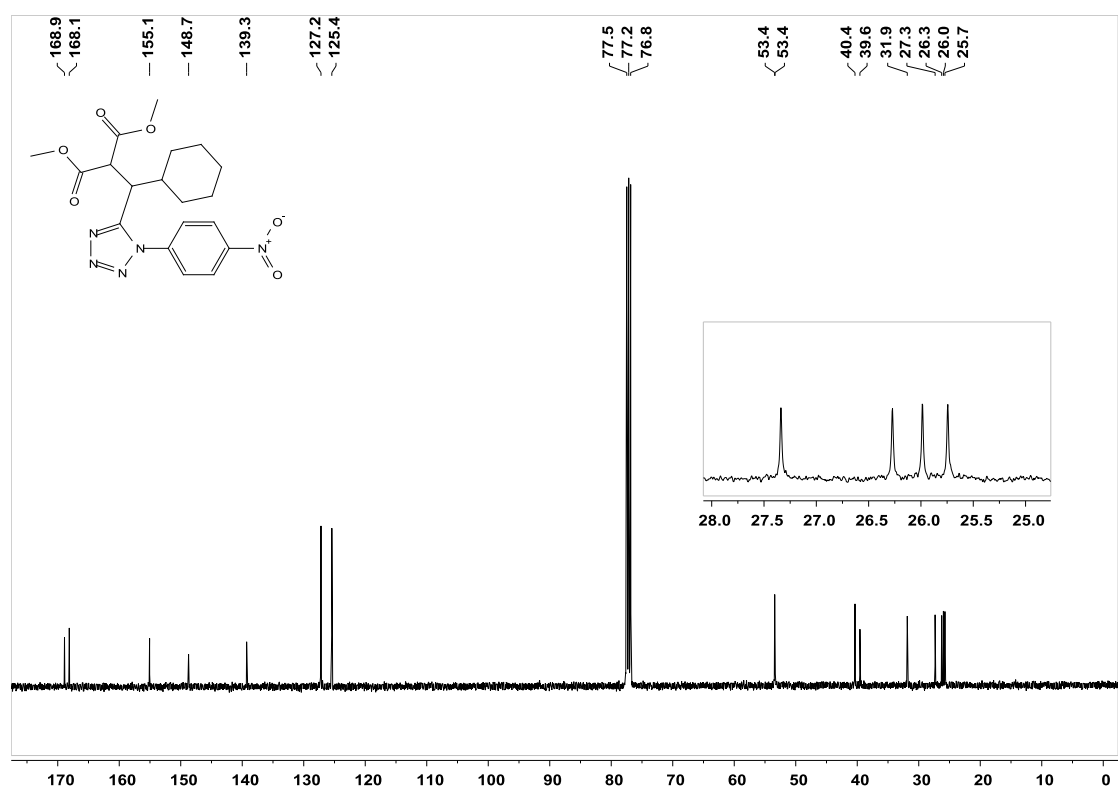

Supplementary Figure 54.  $^{13}\text{C}$  NMR spectra for product **4n**

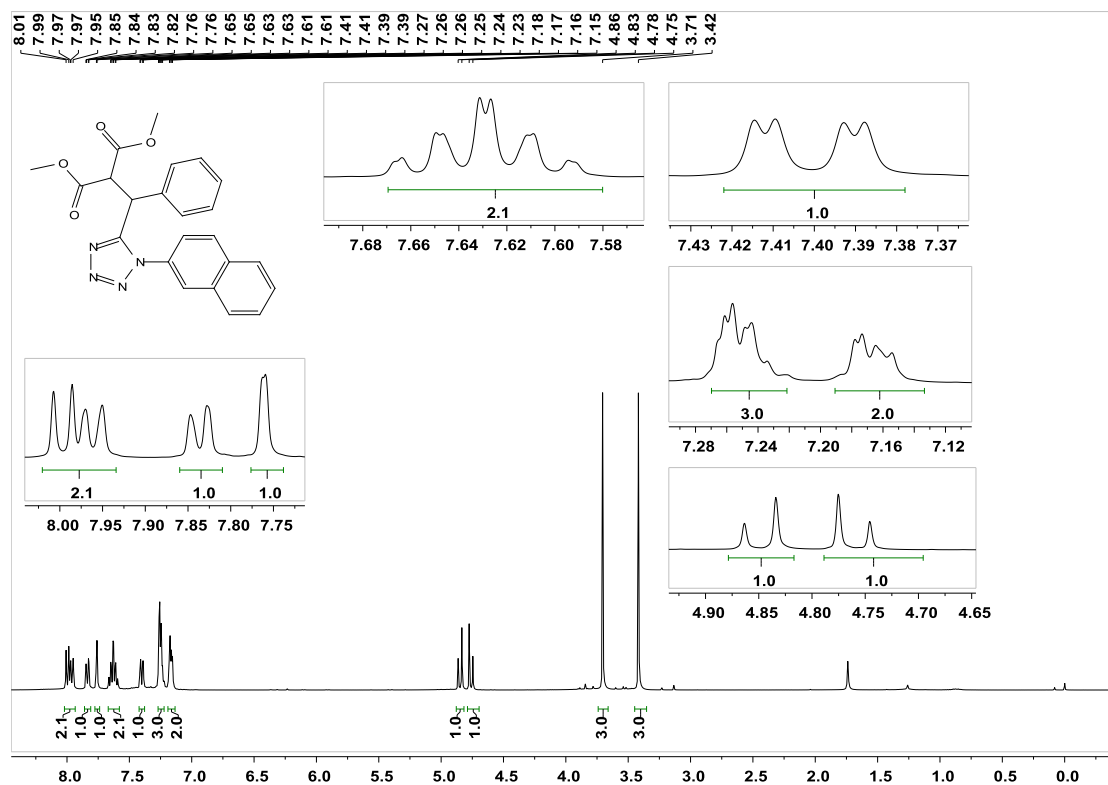

Supplementary Figure 55.  $^1\text{H}$  NMR spectra for product **4o**

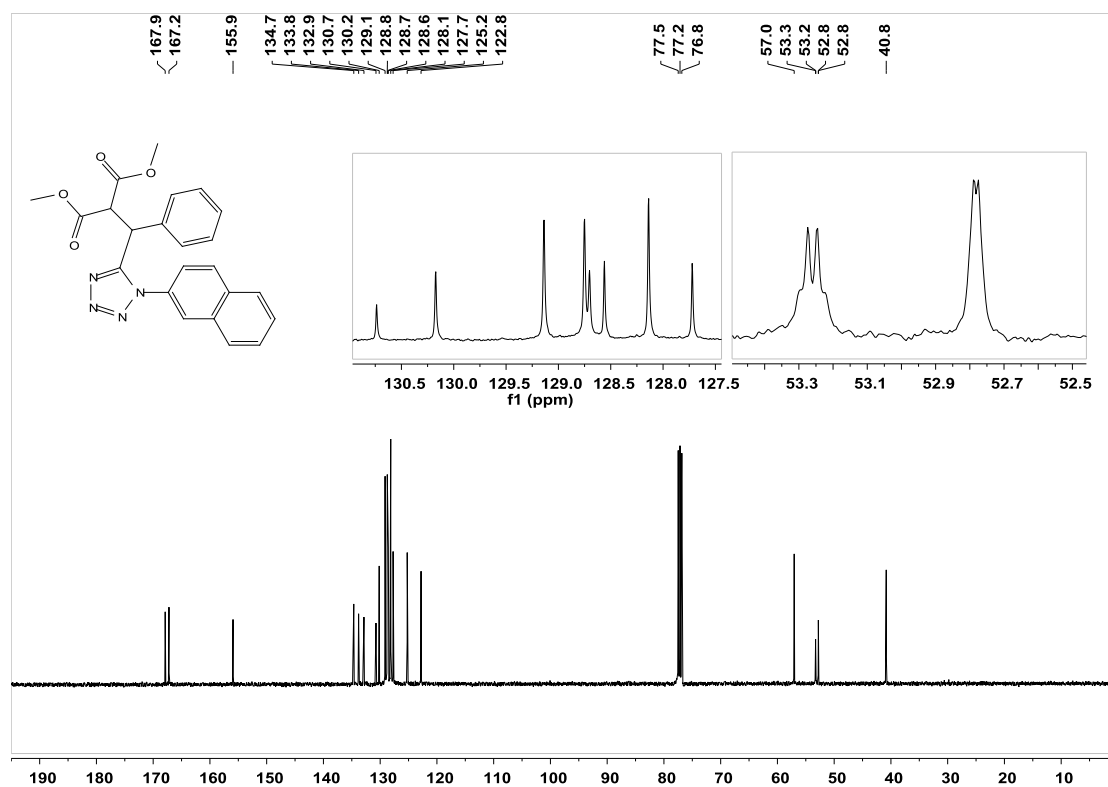

Supplementary Figure 56.  $^{13}\text{C}$  NMR spectra for product **4o**

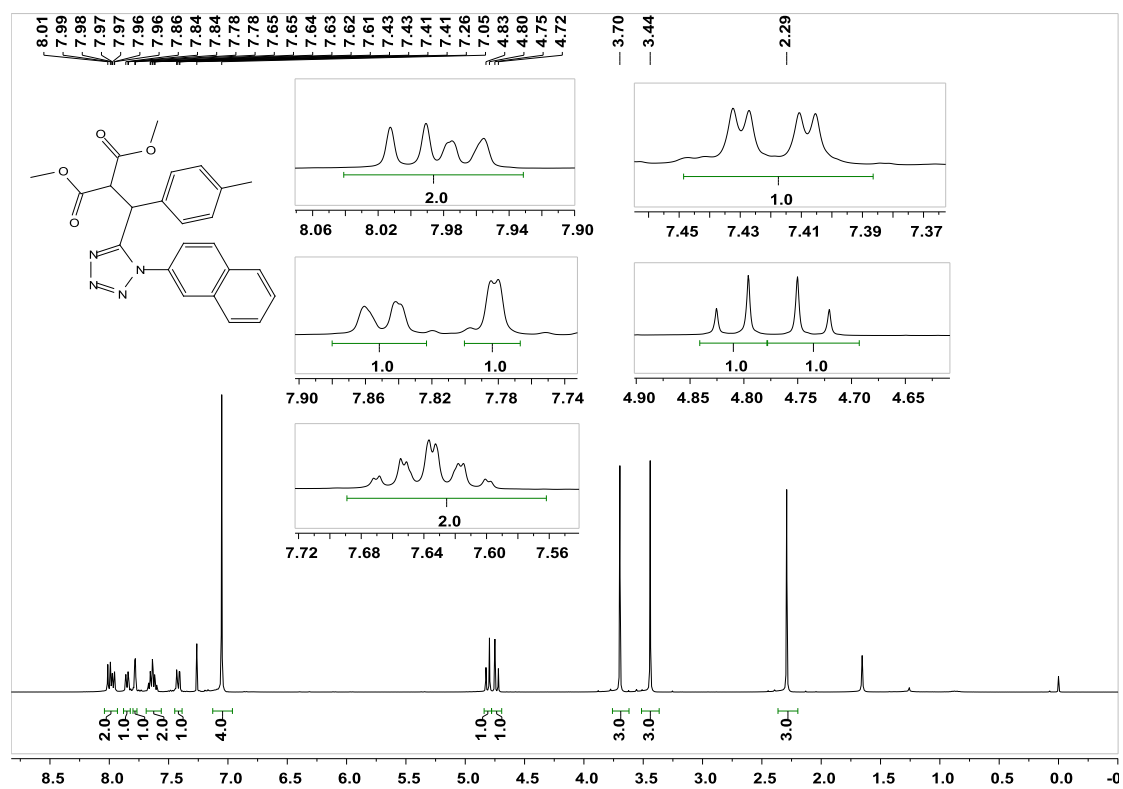

Supplementary Figure 57.  $^1\text{H}$  NMR spectra for product **4p**

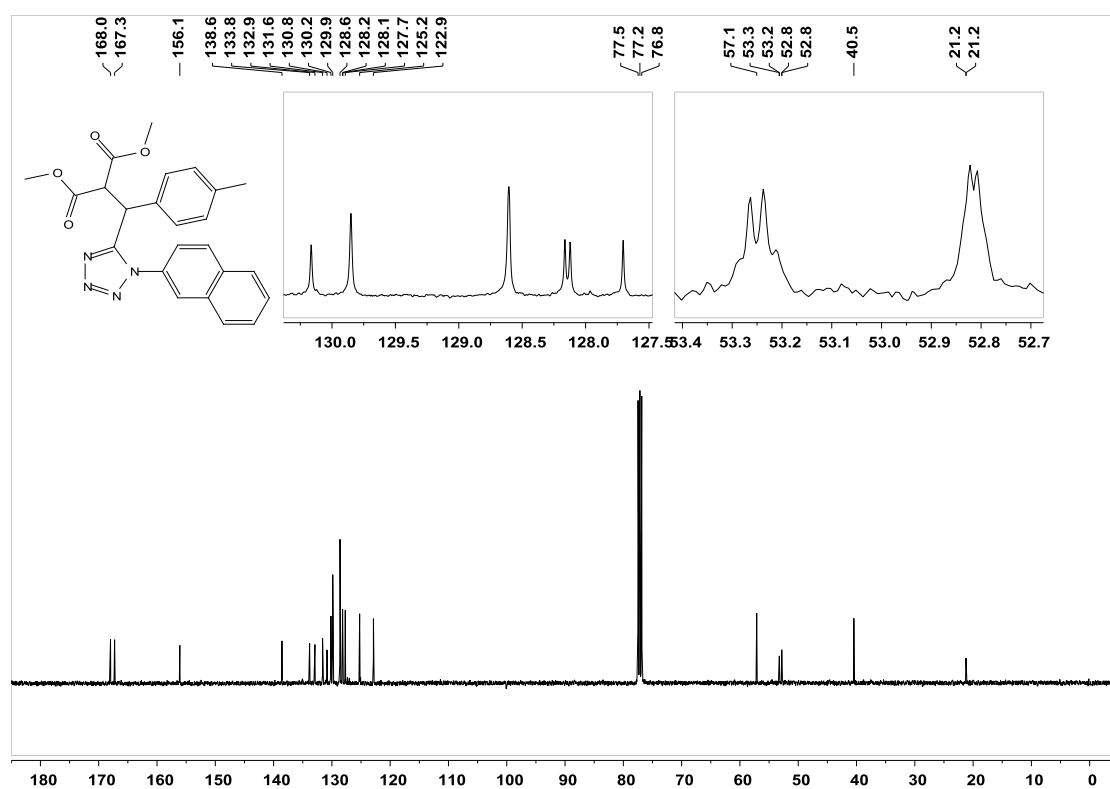

Supplementary Figure 58.  $^{13}\text{C}$  NMR spectra for product **4p**



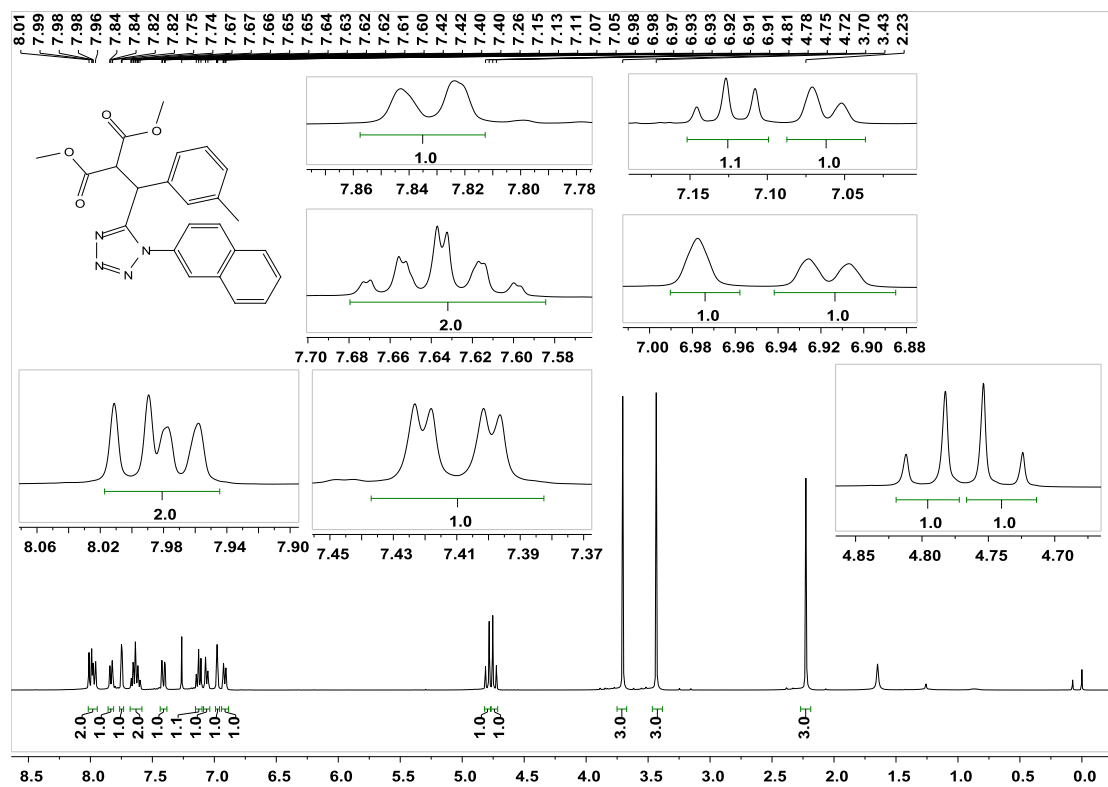

**Supplementary Figure 59.  $^1\text{H}$  NMR spectra for product 4q**

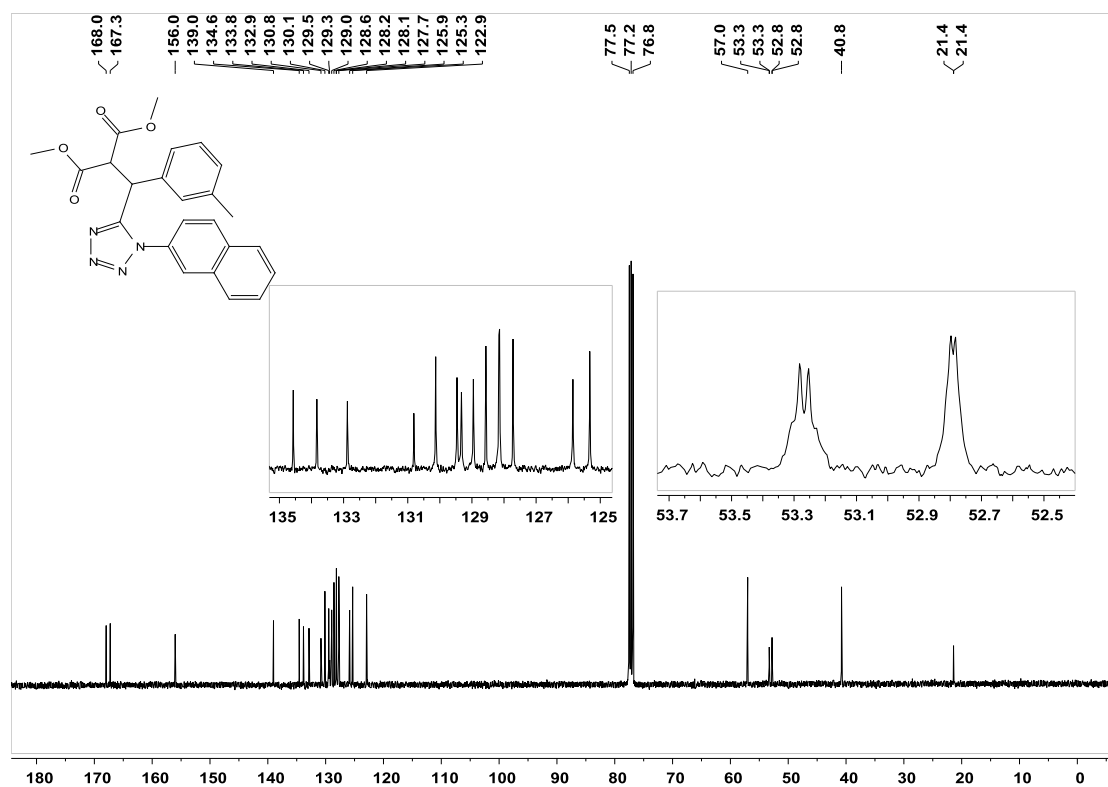

**Supplementary Figure 60.  $^{13}\text{C}$  NMR spectra for product 4q**

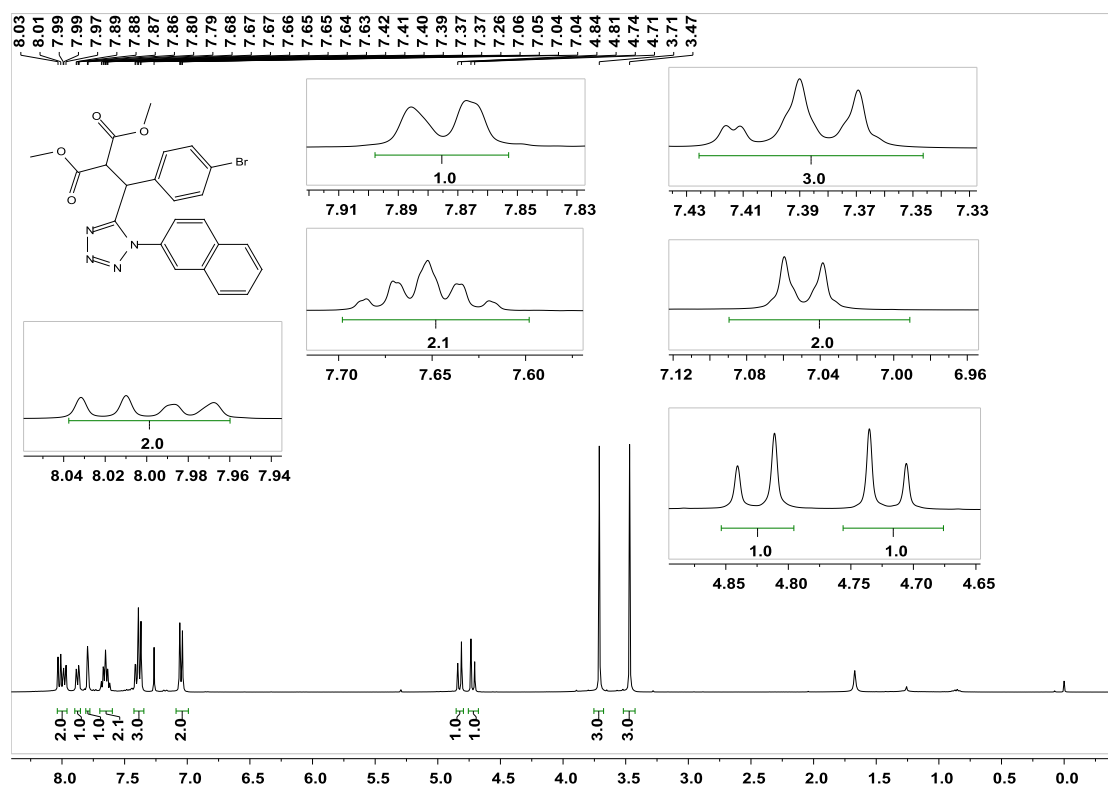

Supplementary Figure 61.  $^1\text{H}$  NMR spectra for product **4r**

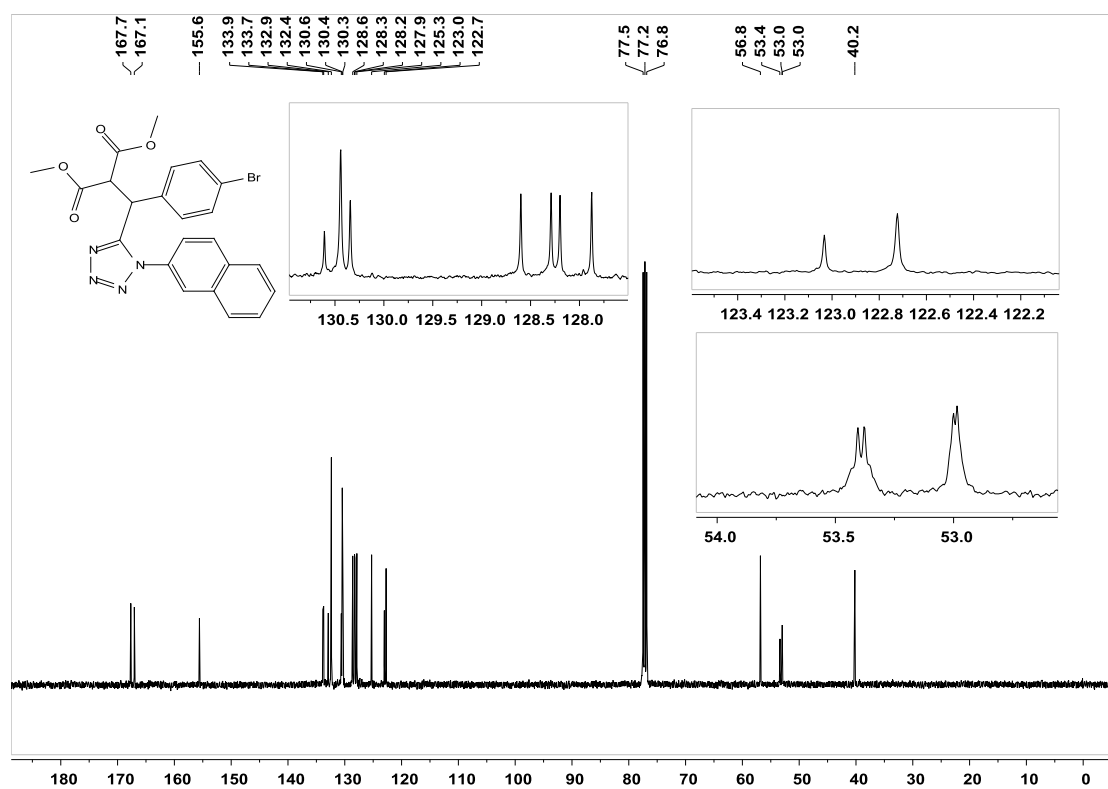

Supplementary Figure 62.  $^{13}\text{C}$  NMR spectra for product **4r**

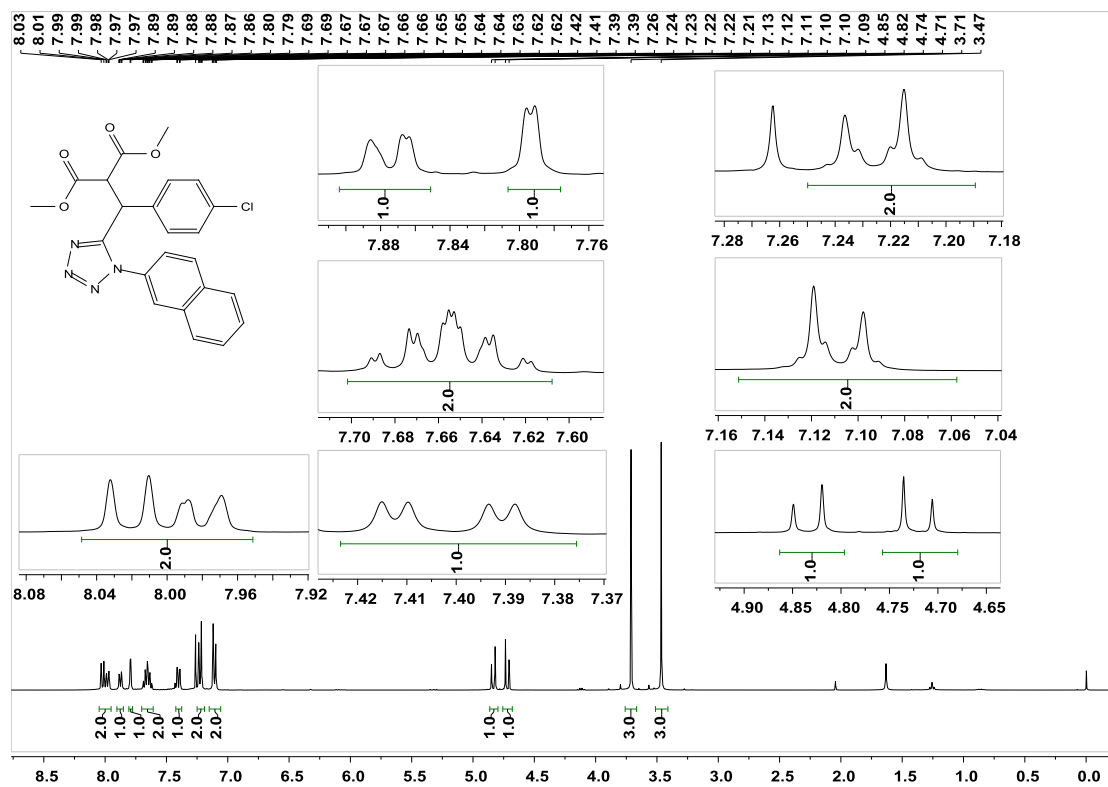

**Supplementary Figure 63.  $^1\text{H}$  NMR spectra for product 4s**

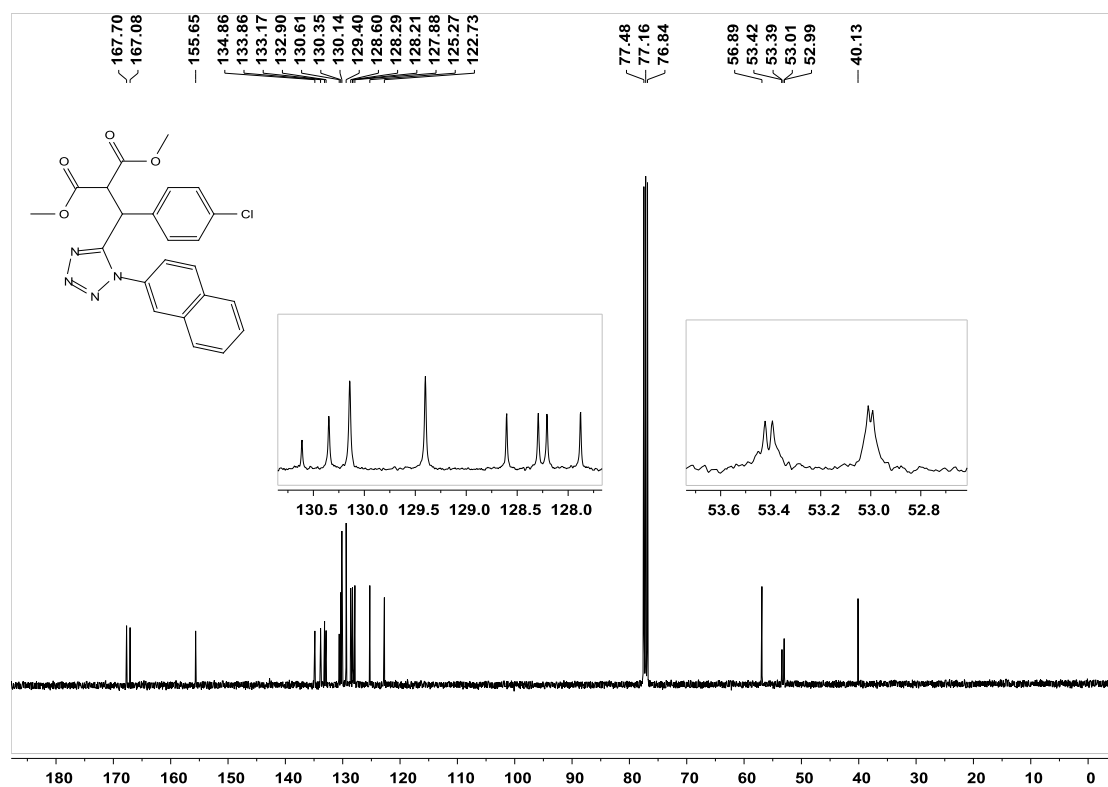

**Supplementary Figure 64.  $^{13}\text{C}$  NMR spectra for product 4s**

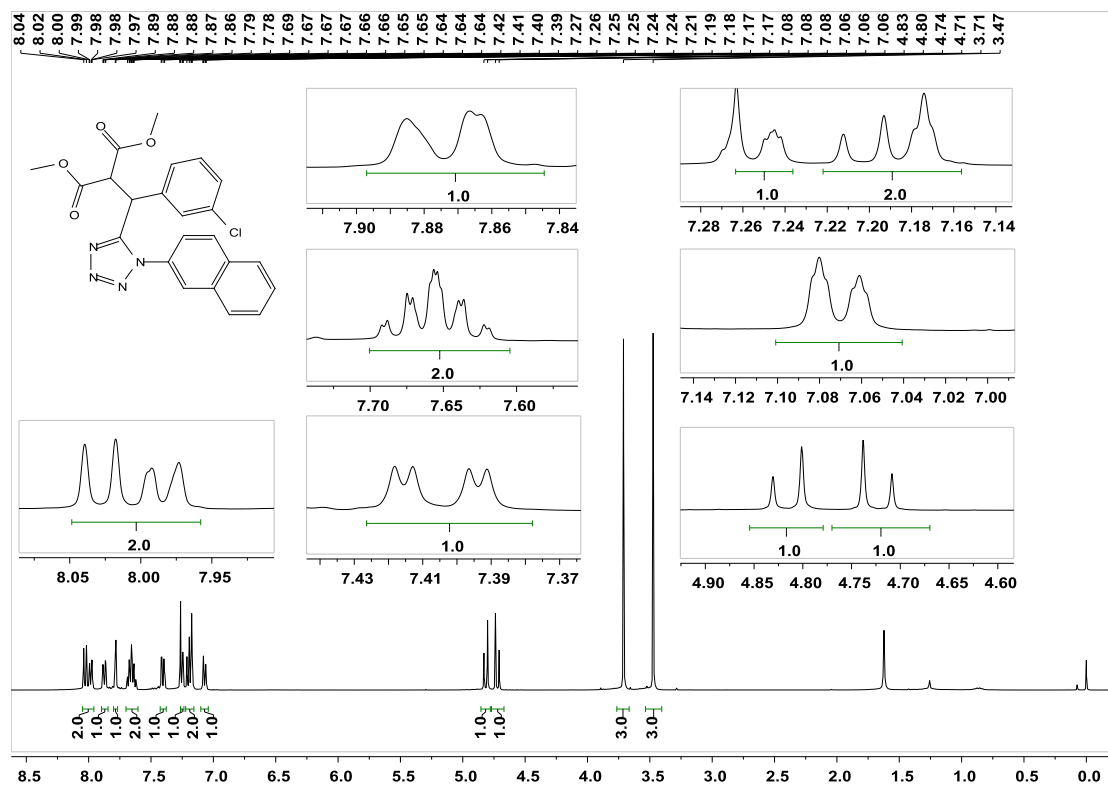

Supplementary Figure 65. <sup>1</sup>H NMR spectra for product 4t

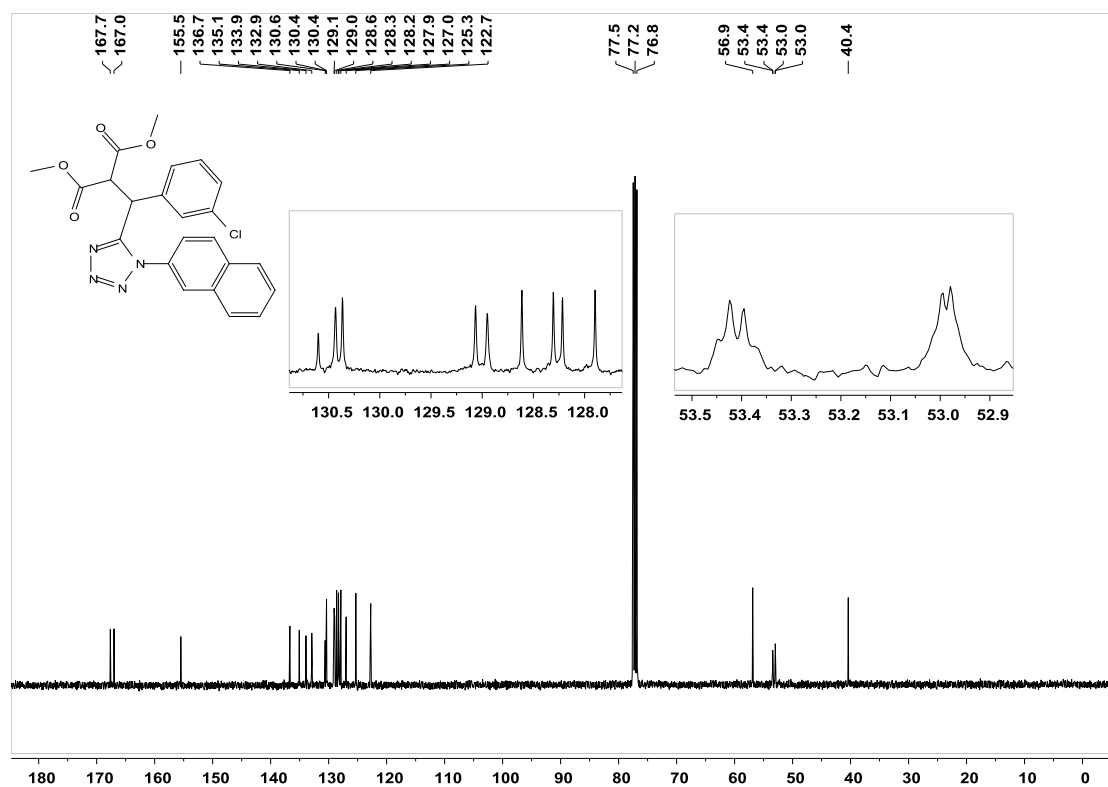

Supplementary Figure 66. <sup>13</sup>C NMR spectra for product 4t

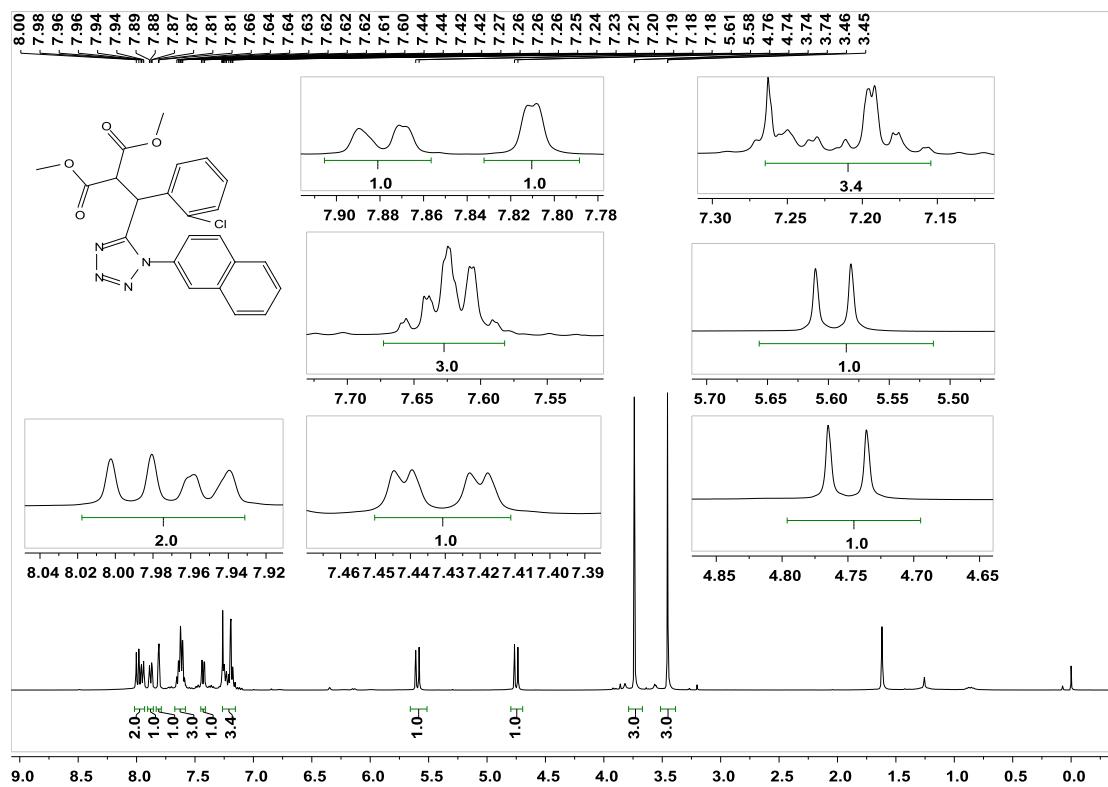

Supplementary Figure 67.  $^1\text{H}$  NMR spectra for product **4u**

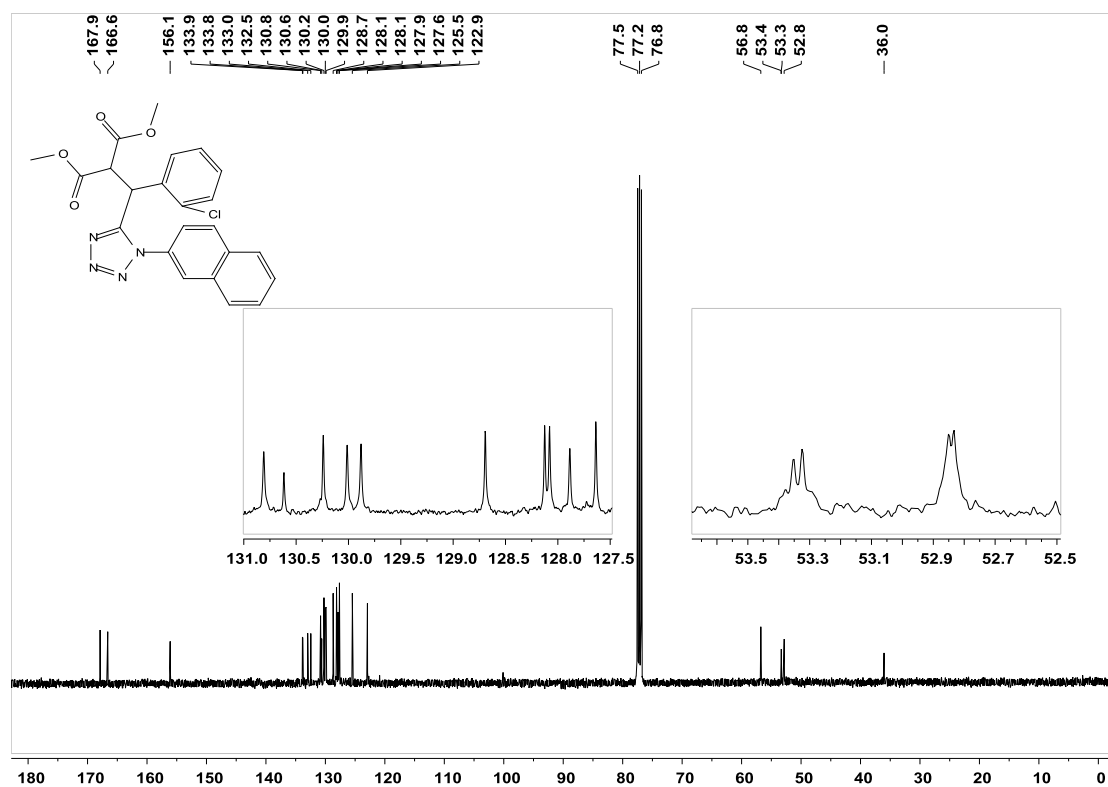

Supplementary Figure 68.  $^{13}\text{C}$  NMR spectra for product **4u**

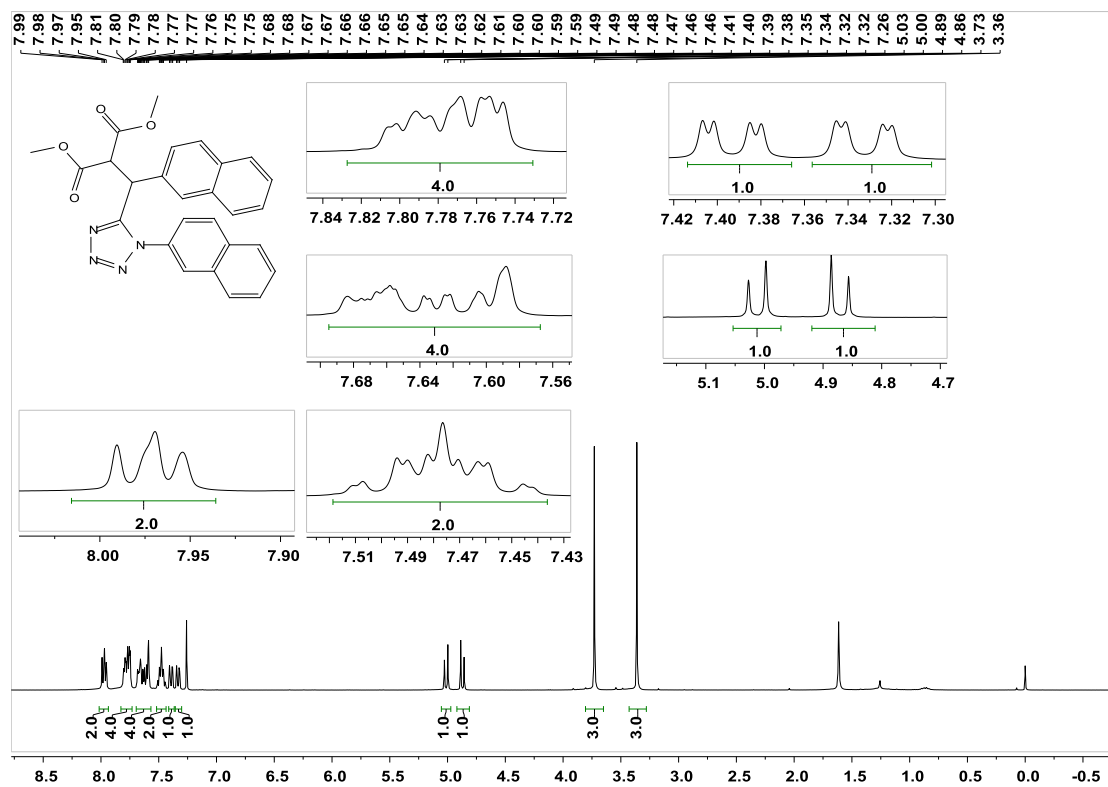

Supplementary Figure 69.  $^1\text{H}$  NMR spectra for product **4v**

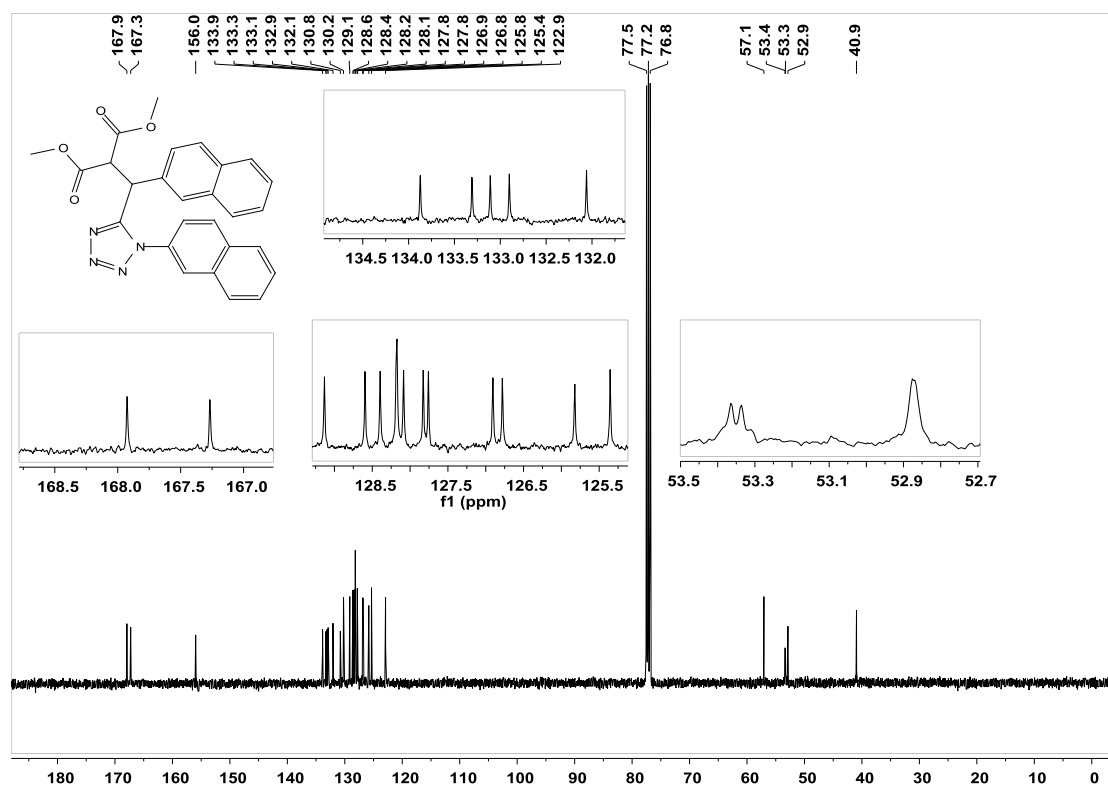

Supplementary Figure 70.  $^{13}\text{C}$  NMR spectra for product **4v**

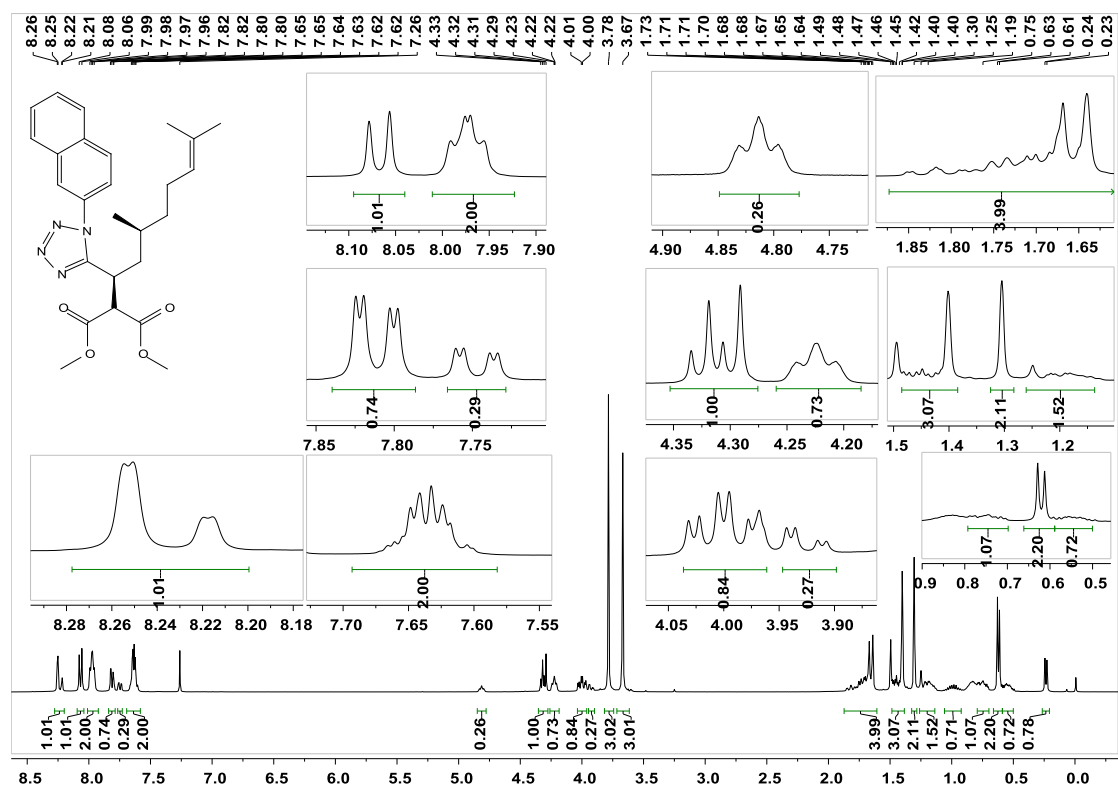

Supplementary Figure 71. <sup>1</sup>H NMR spectra for product 4w

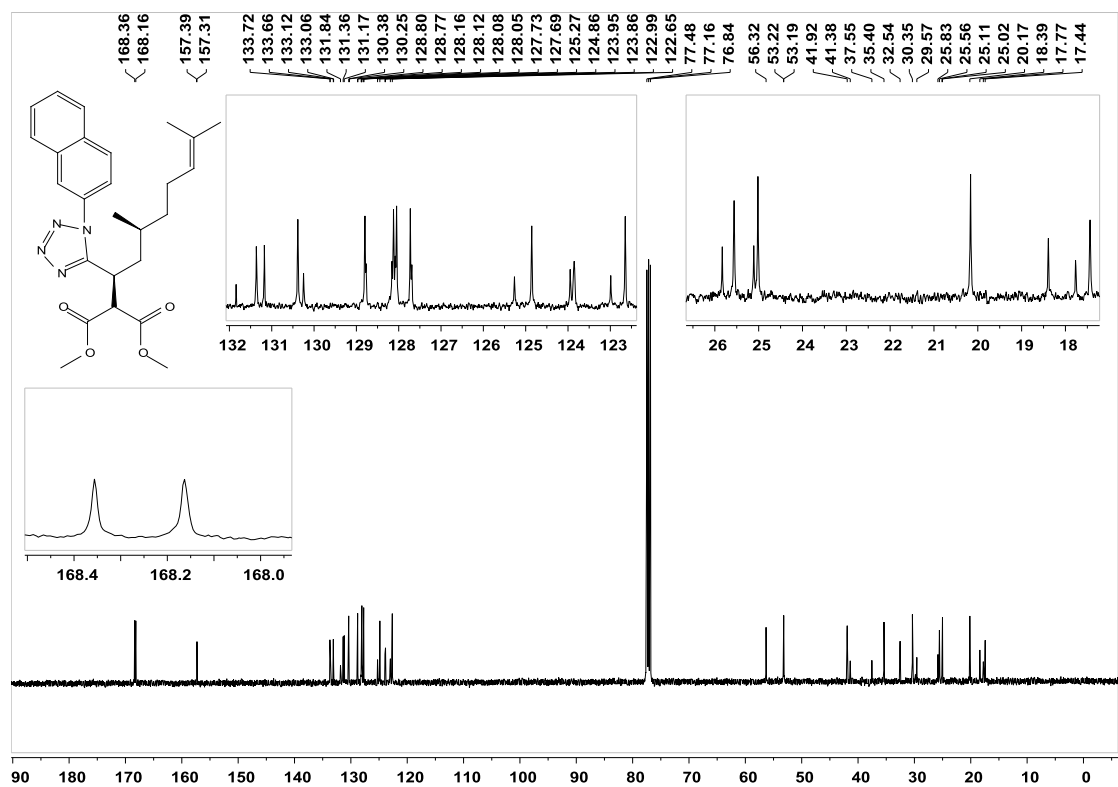

Supplementary Figure 72. <sup>13</sup>C NMR spectra for product 4w

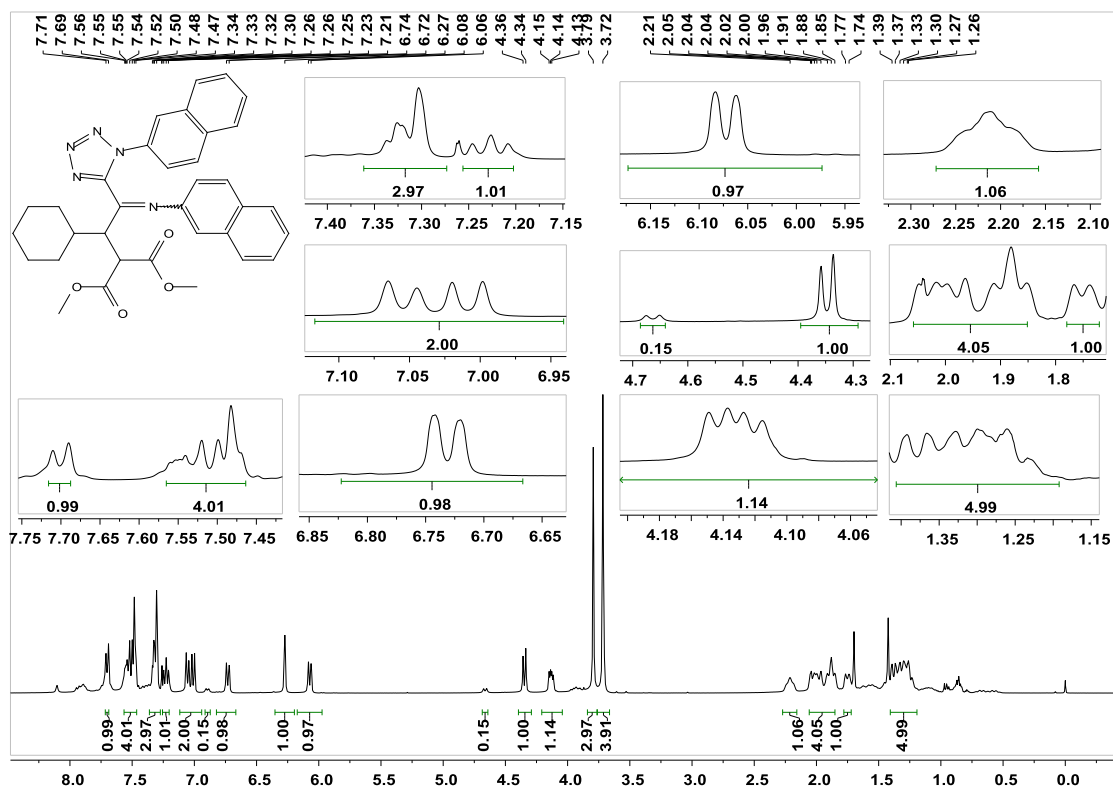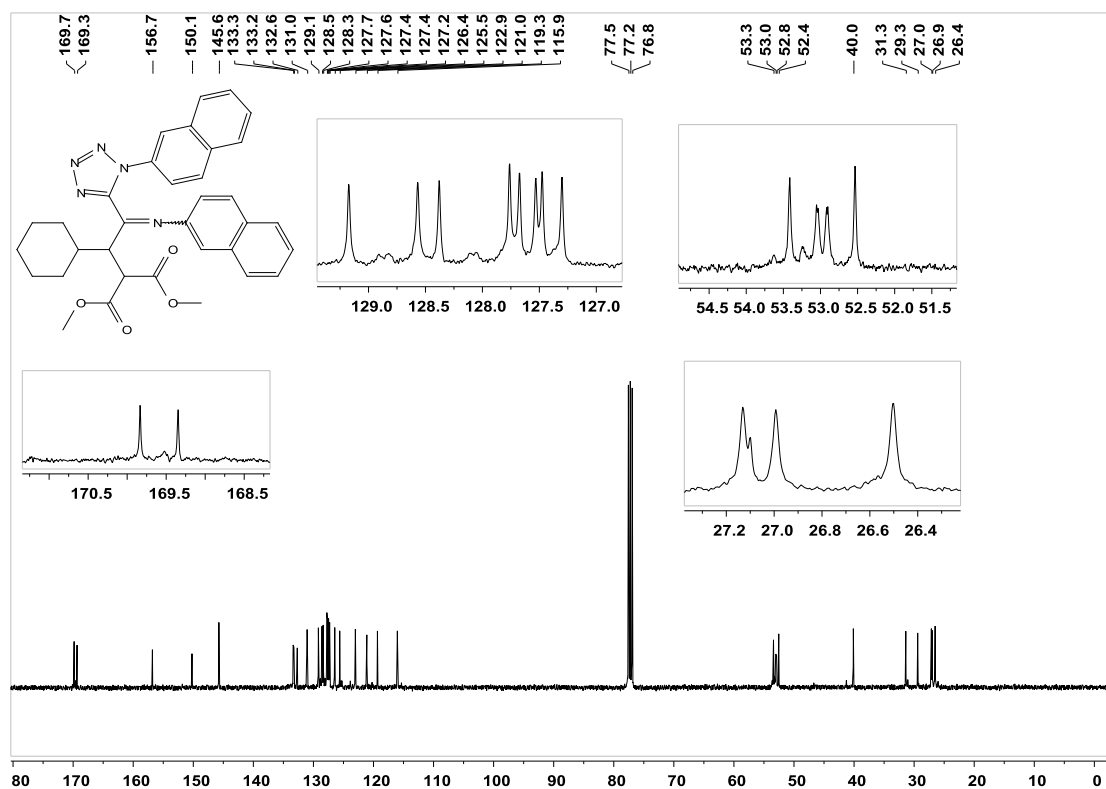



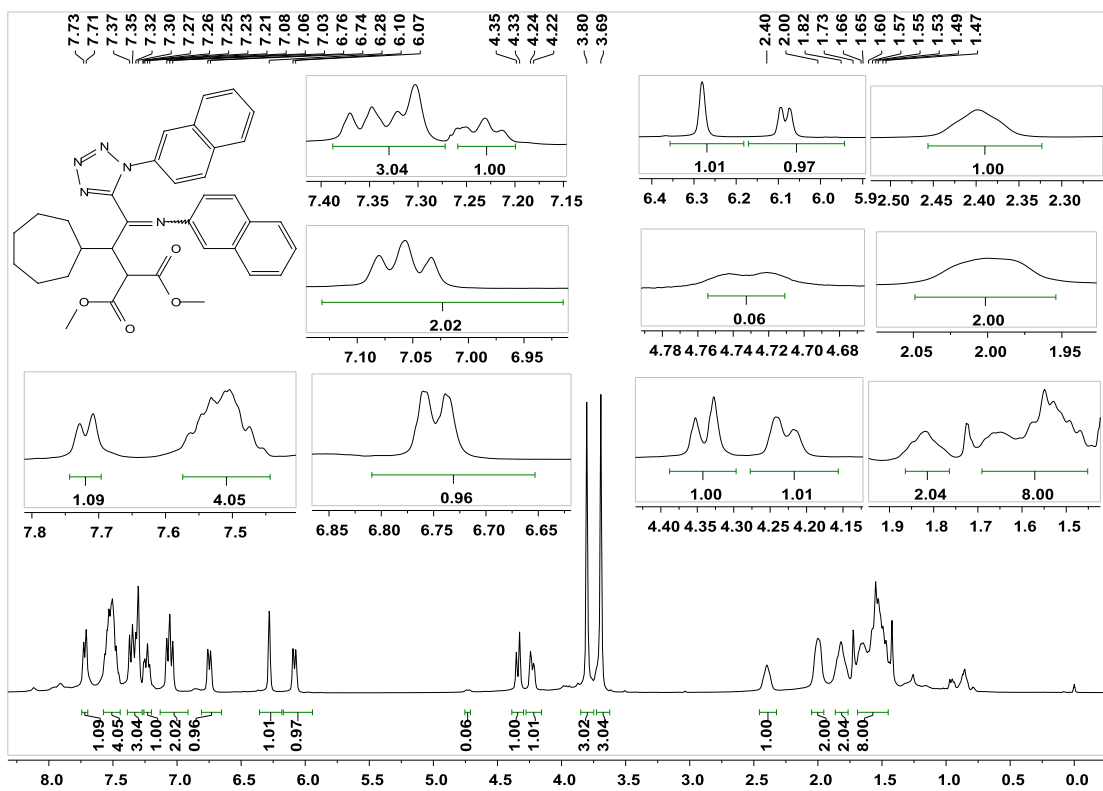

Supplementary Figure 75.  $^1\text{H}$  NMR spectra for product **5b**

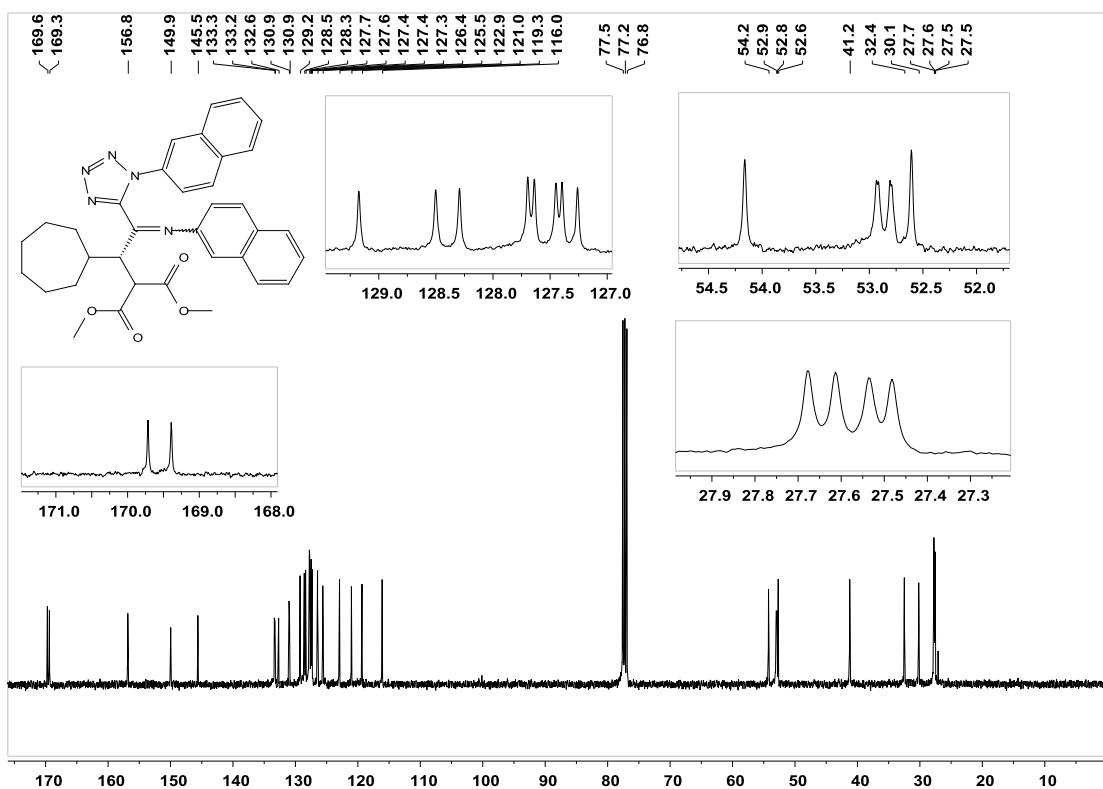

Supplementary Figure 76.  $^{13}\text{C}$  NMR spectra for product **5b**

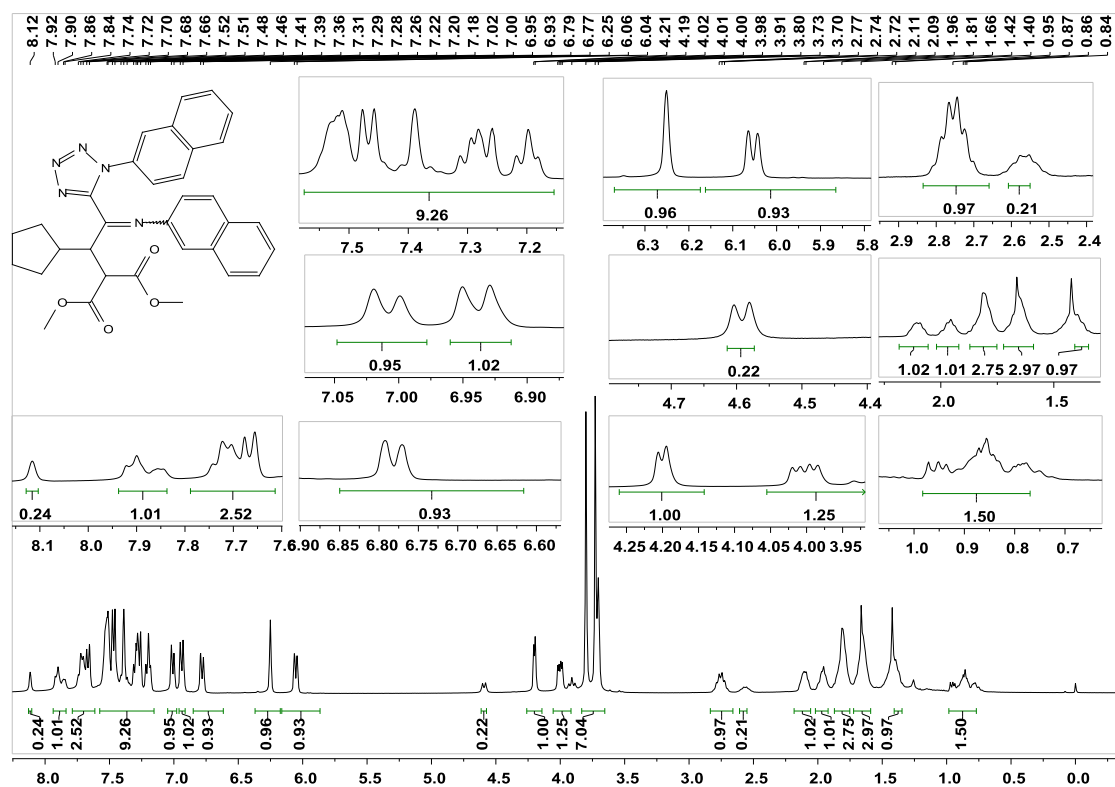

Supplementary Figure 77. <sup>1</sup>H NMR spectra for product 5c

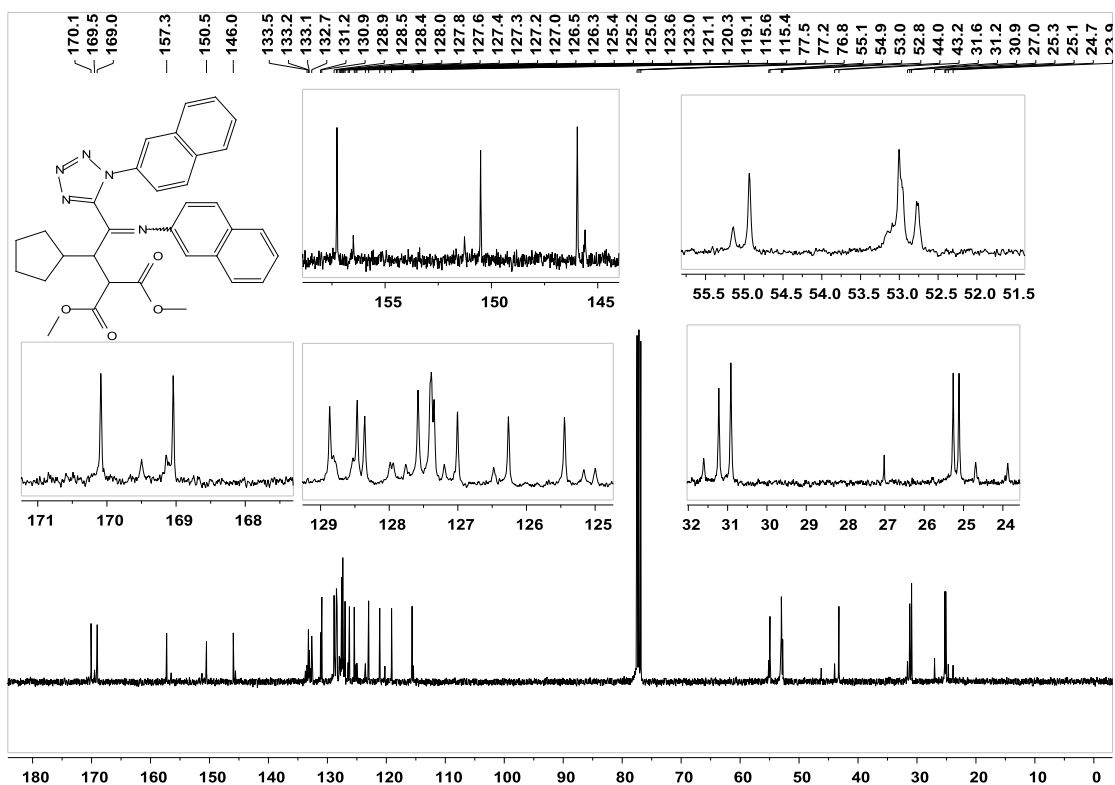

Supplementary Figure 78. <sup>13</sup>C NMR spectra for product 5c

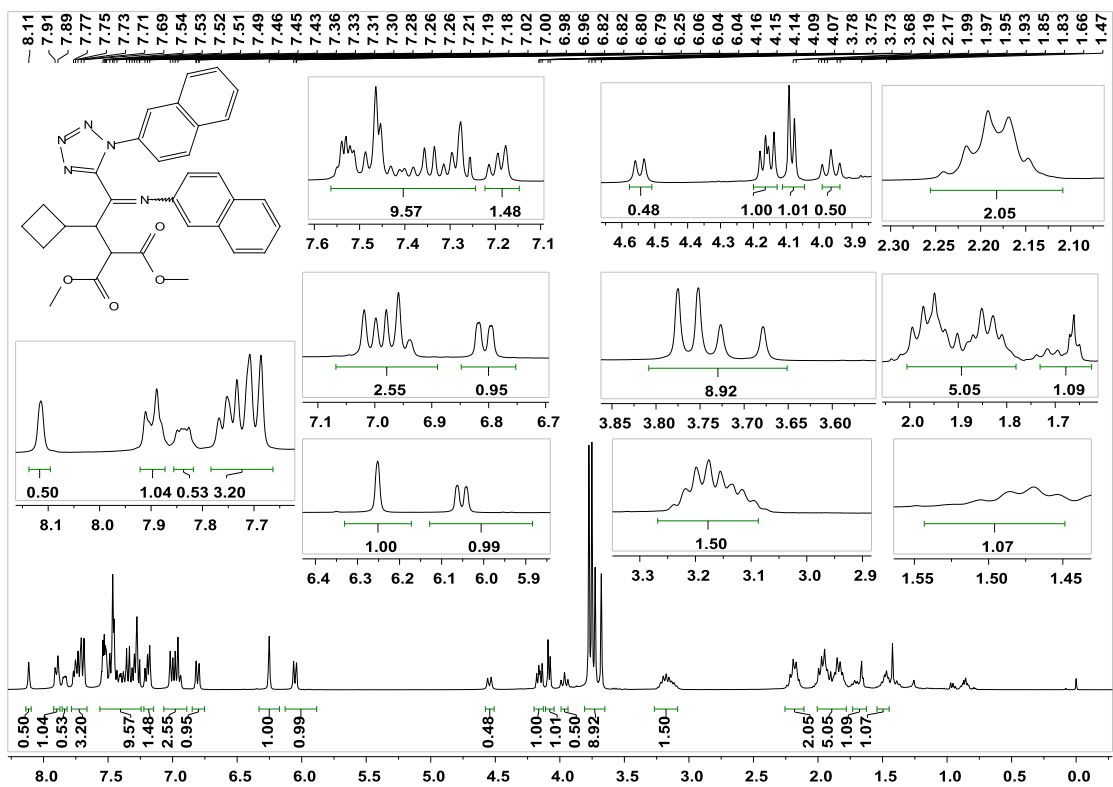

Supplementary Figure 79. <sup>1</sup>H NMR spectra for product 5d

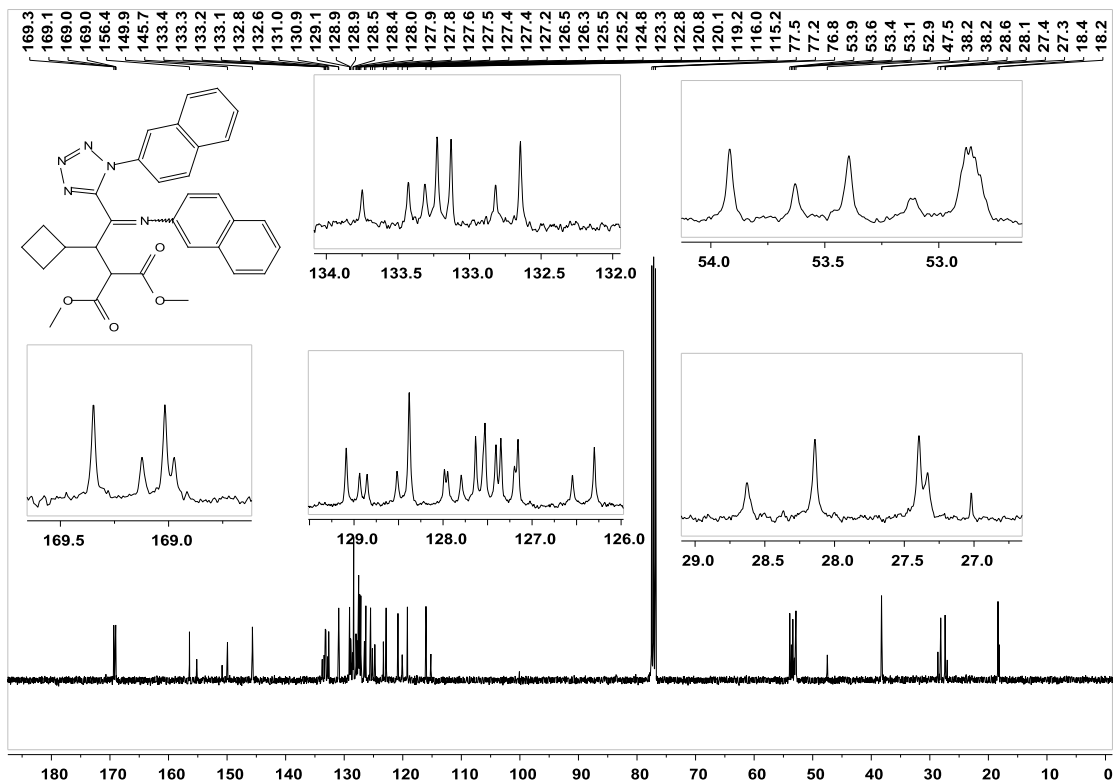

Supplementary Figure 80. <sup>13</sup>C NMR spectra for product 5d

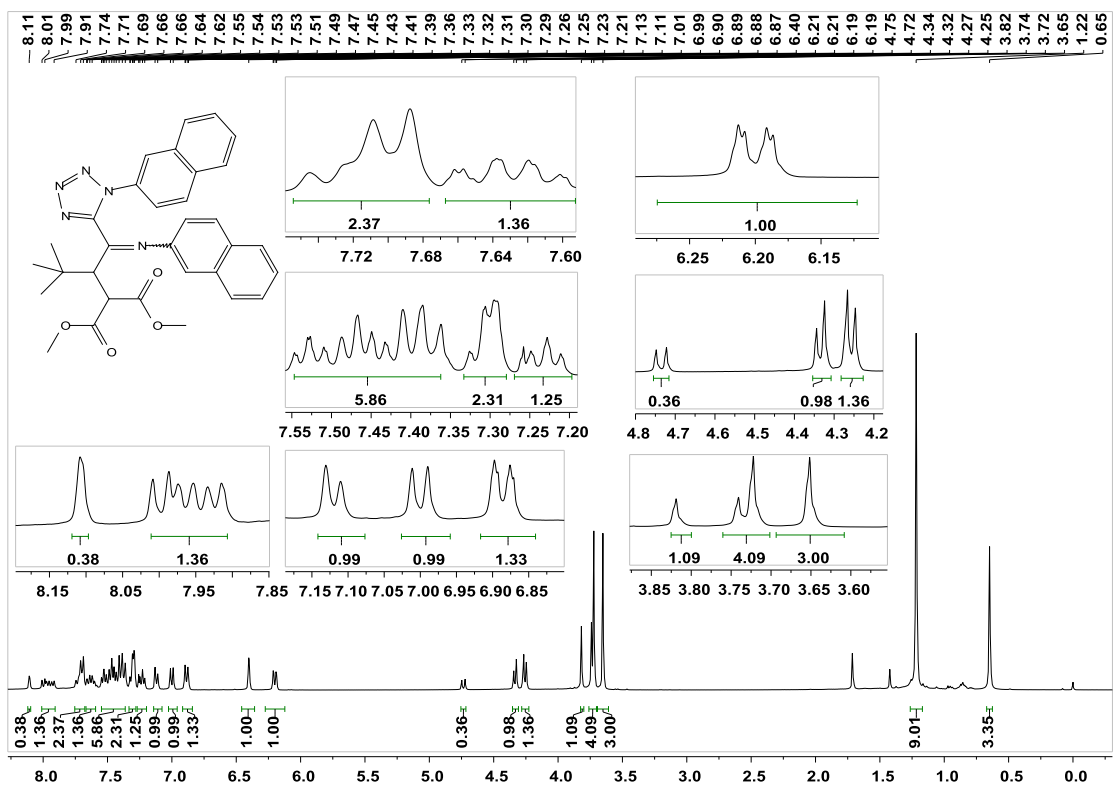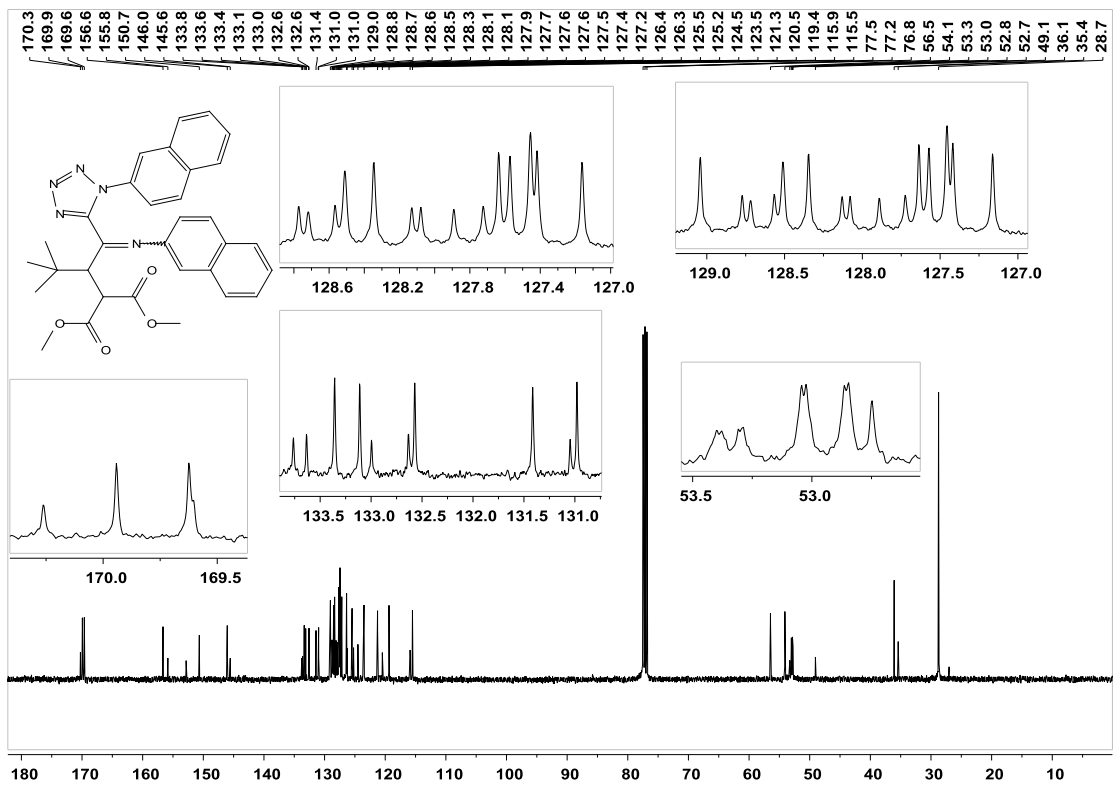

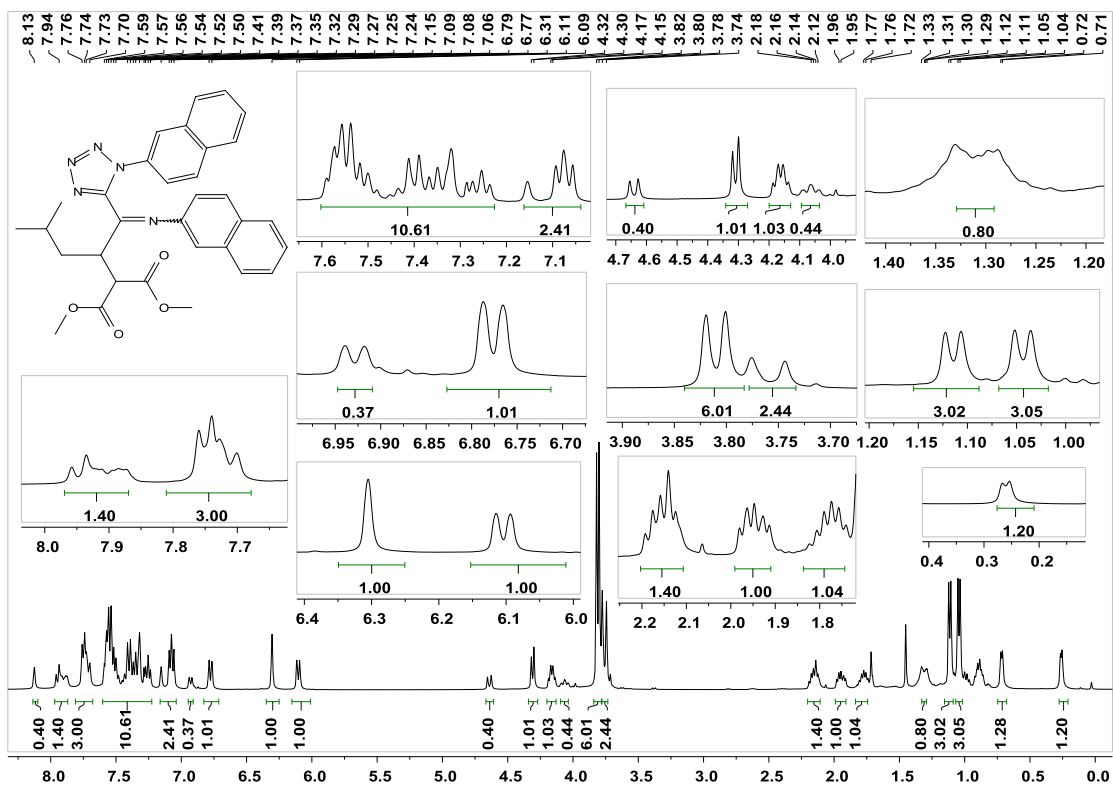

**Supplementary Figure 83.**  $^1\text{H}$  NMR spectra for product **5f**

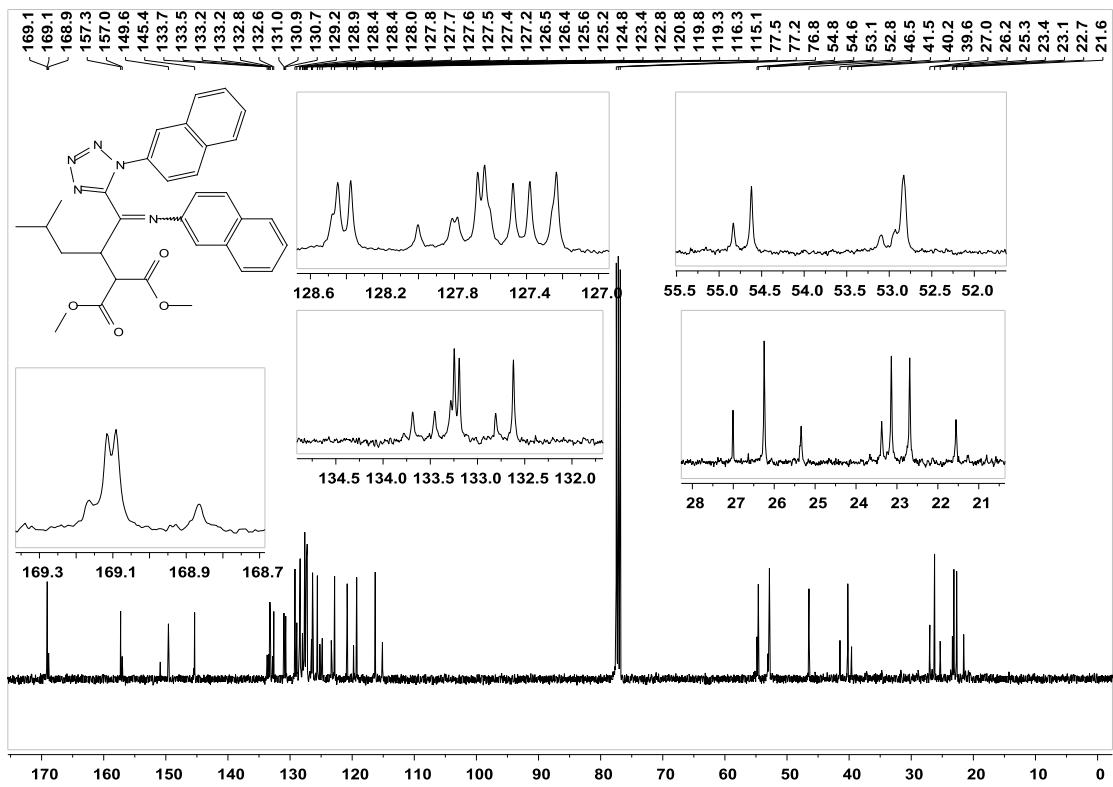

**Supplementary Figure 84.**  $^{13}\text{C}$  NMR spectra for product **5f**

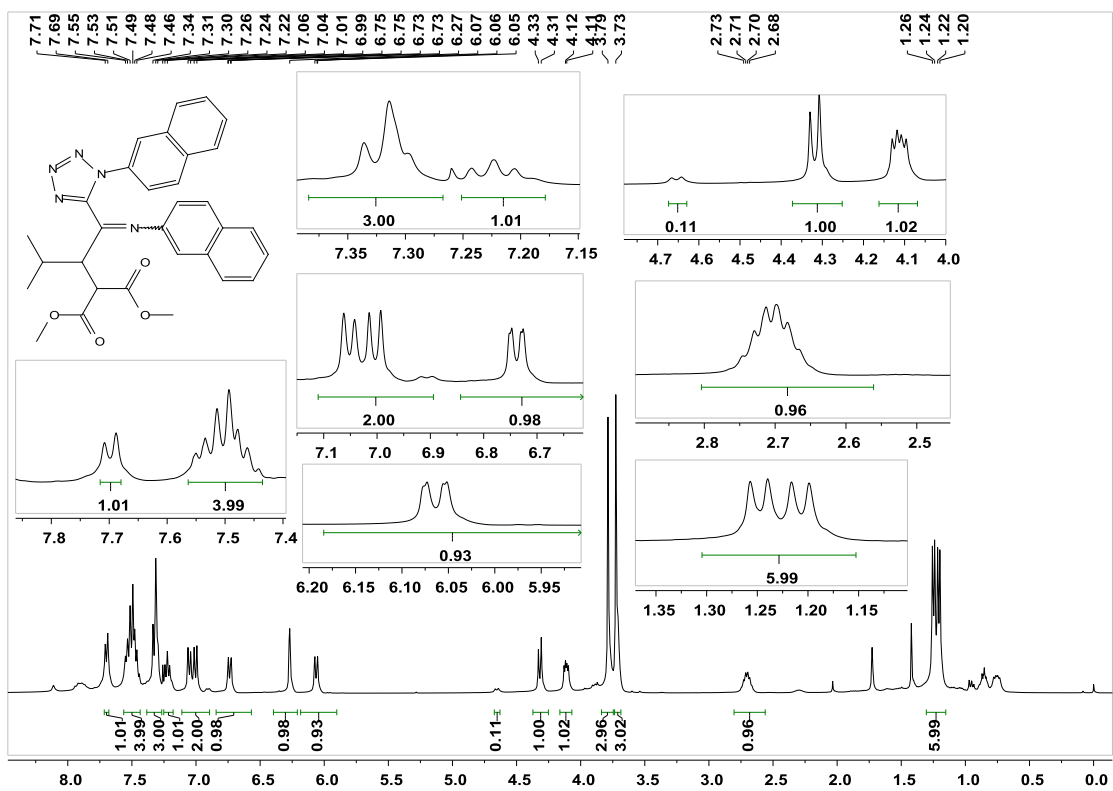

**Supplementary Figure 85.** <sup>1</sup>H NMR spectra for product **5g**

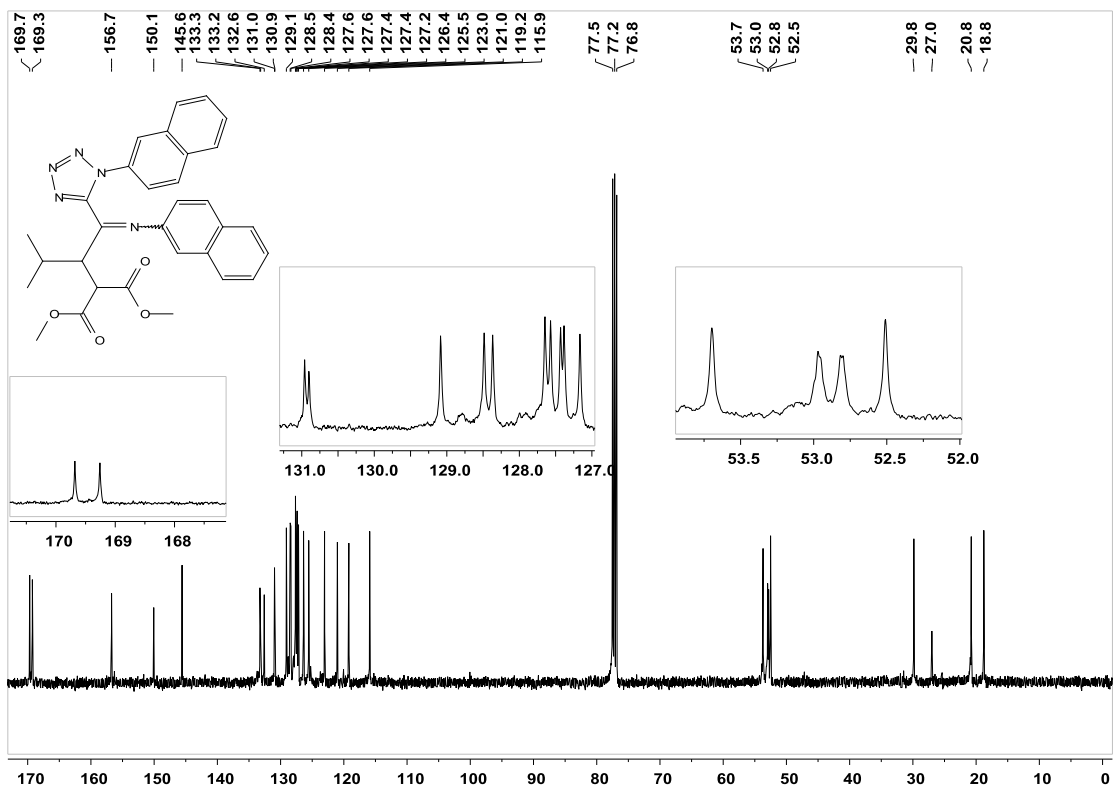

**Supplementary Figure 86.** <sup>13</sup>C NMR spectra for product **5g**

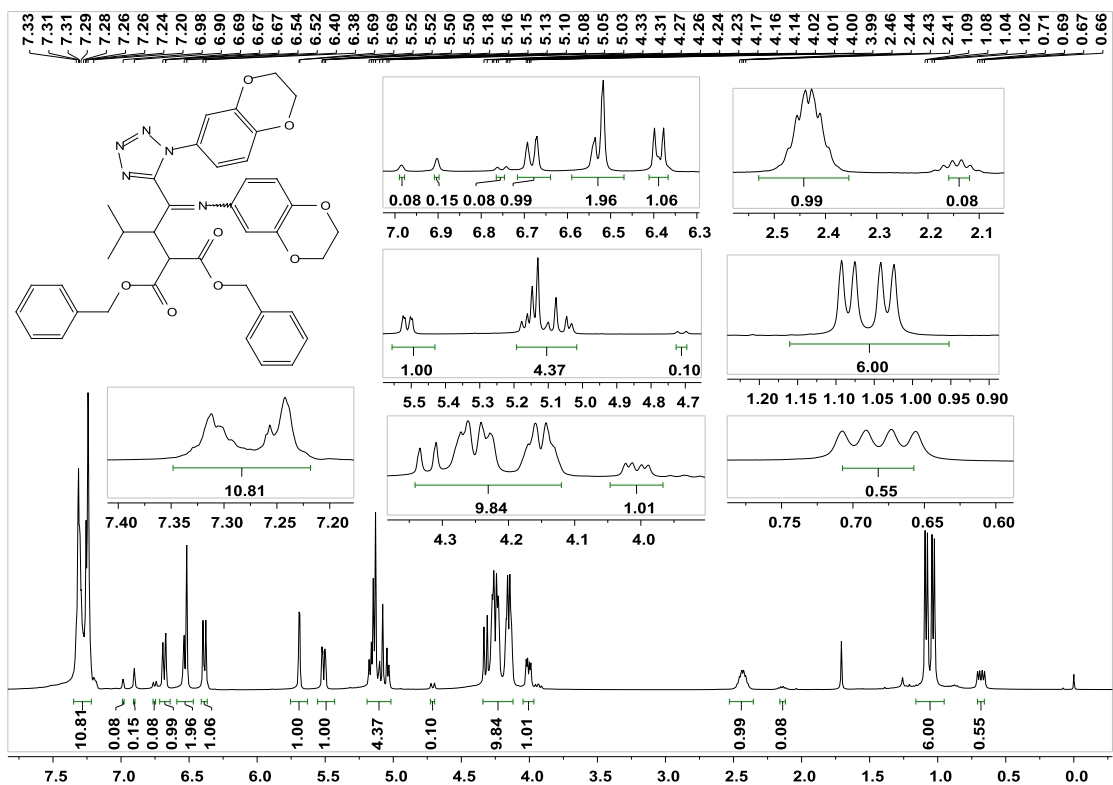

**Supplementary Figure 87.**  $^1\text{H}$  NMR spectra for product **5h**

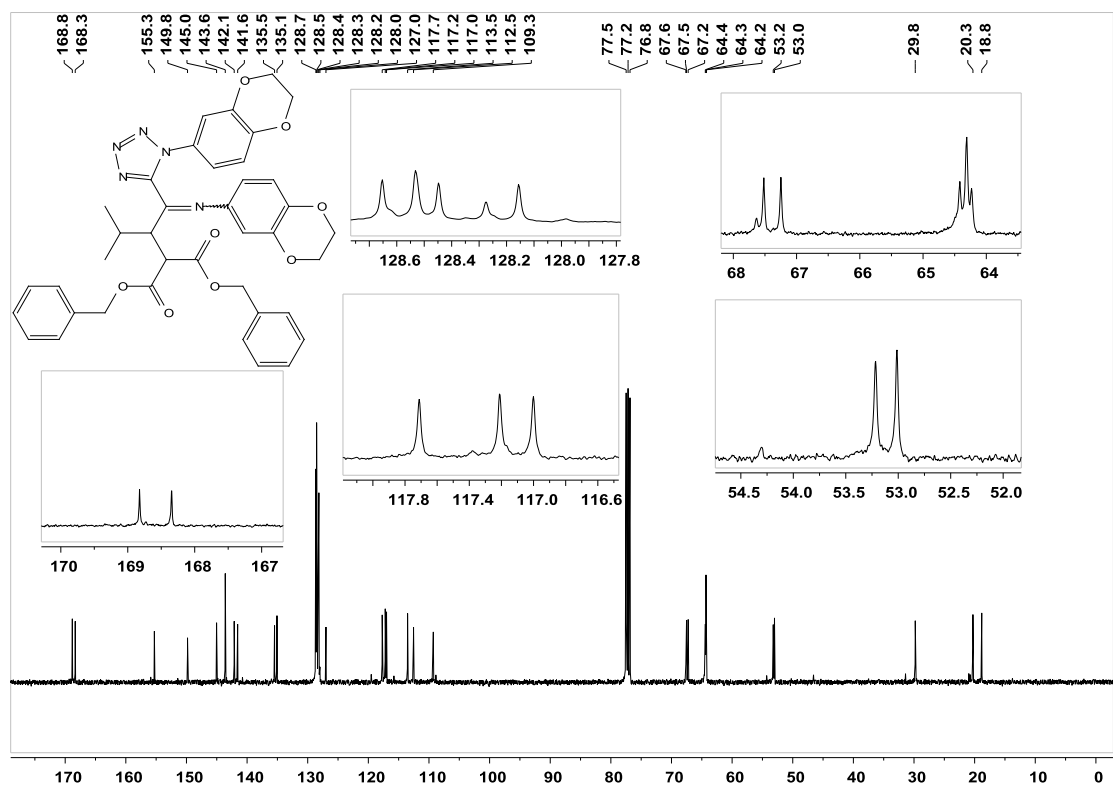

**Supplementary Figure 88.**  $^{13}\text{C}$  NMR spectra for product **5h**

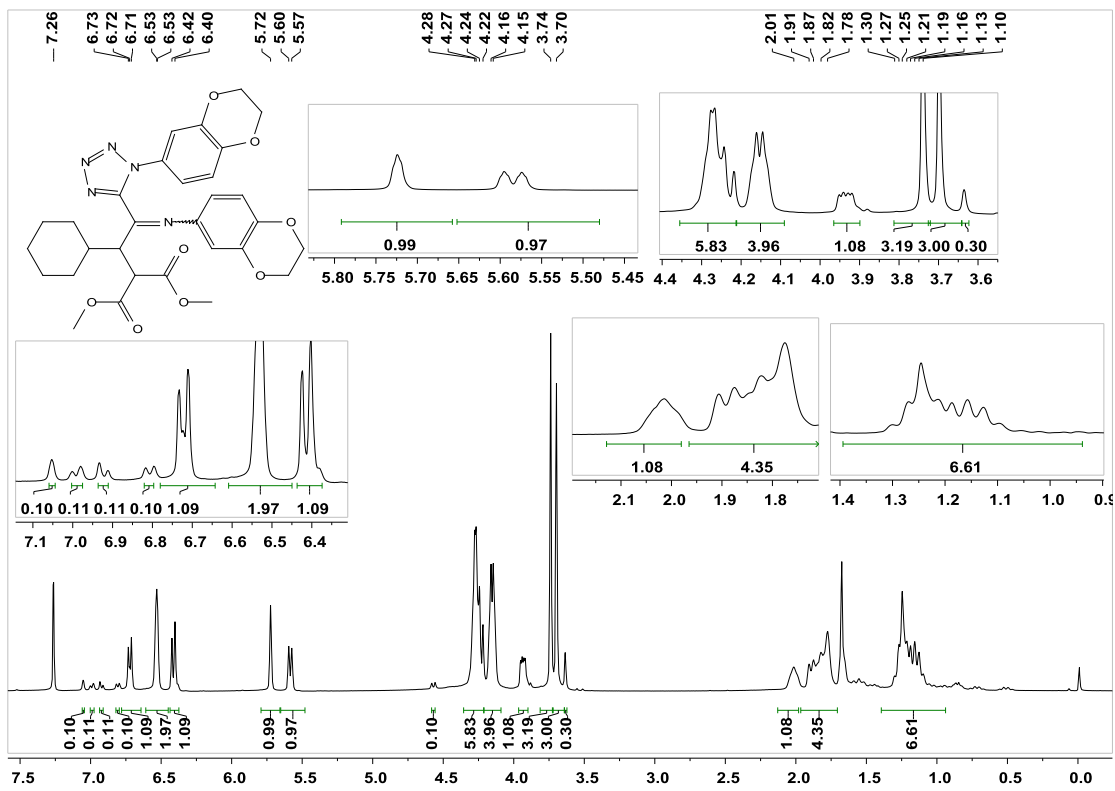

**Supplementary Figure 89.** <sup>1</sup>H NMR spectra for product **5i**

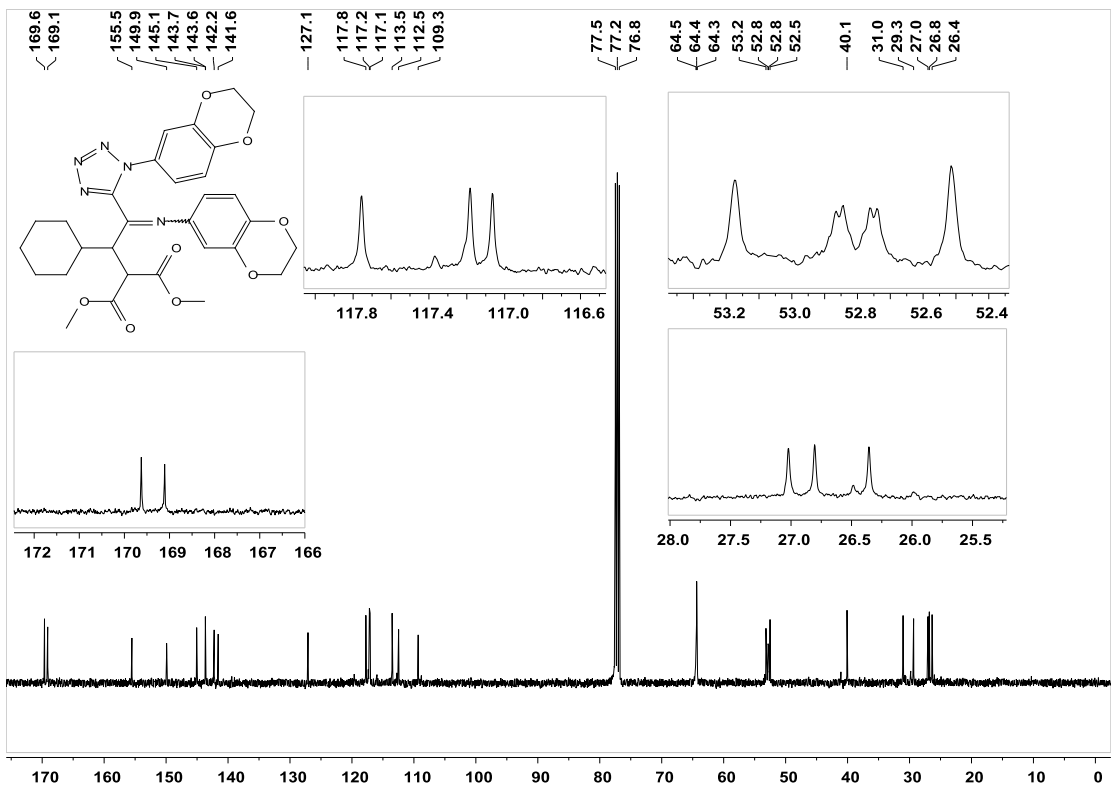

**Supplementary Figure 90.** <sup>13</sup>C NMR spectra for product **5i**



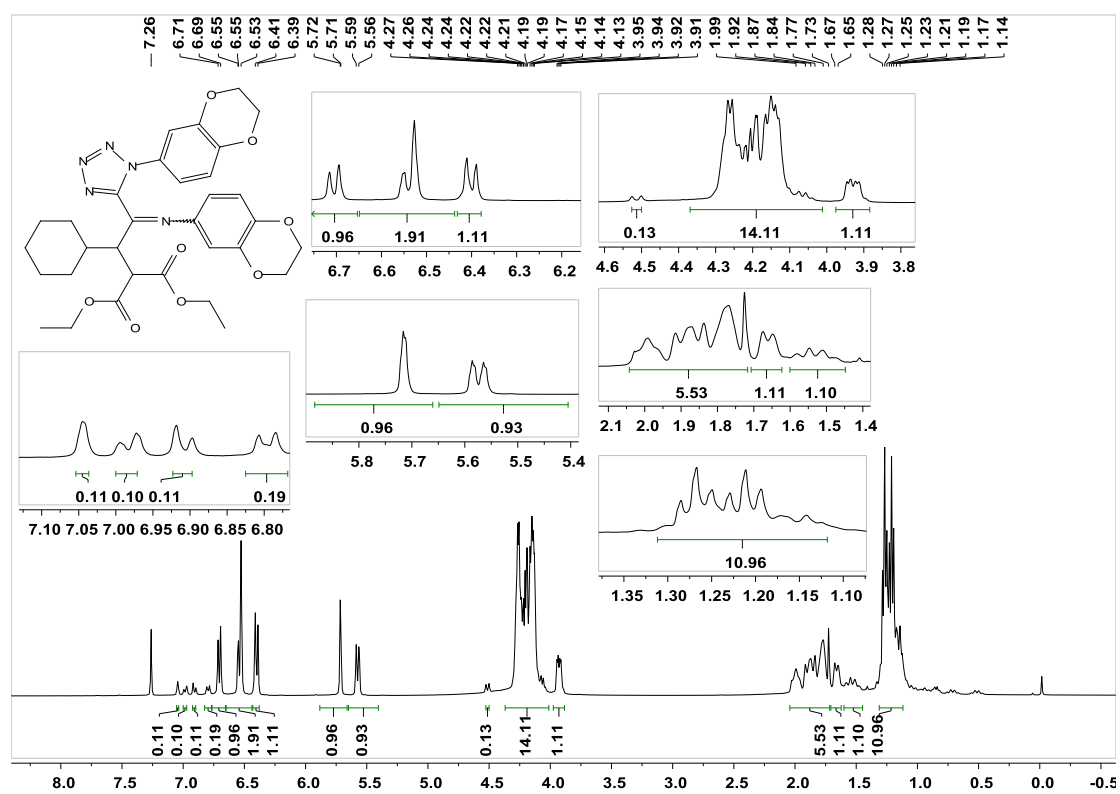

**Supplementary Figure 91.  $^1\text{H}$  NMR spectra for product **5j****

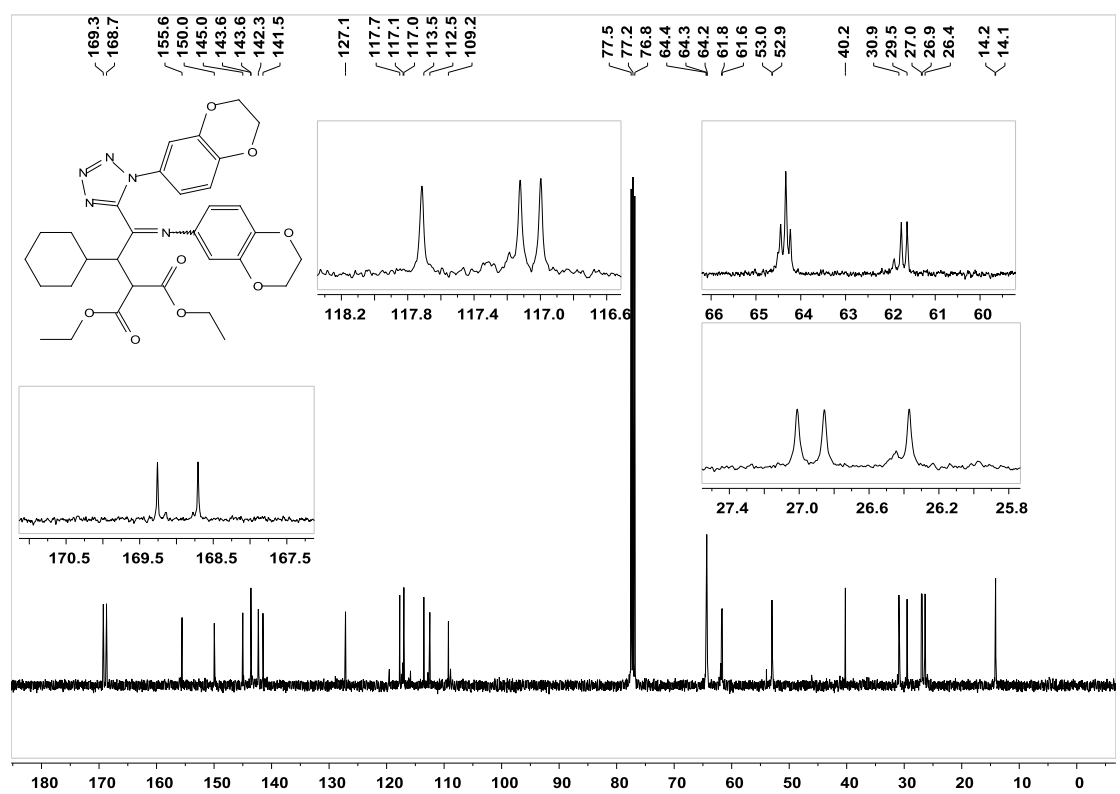

**Supplementary Figure 92.  $^{13}\text{C}$  NMR spectra for product **5j****

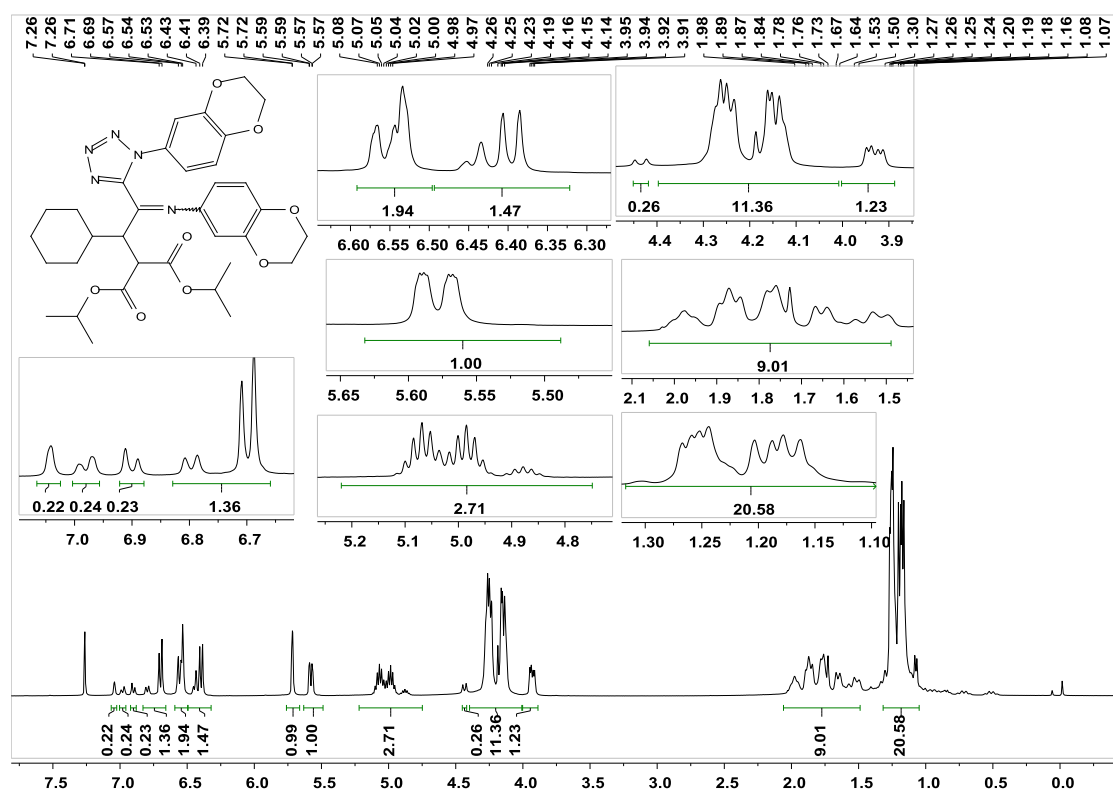

Supplementary Figure 93.  $^1\text{H}$  NMR spectra for product **5k**

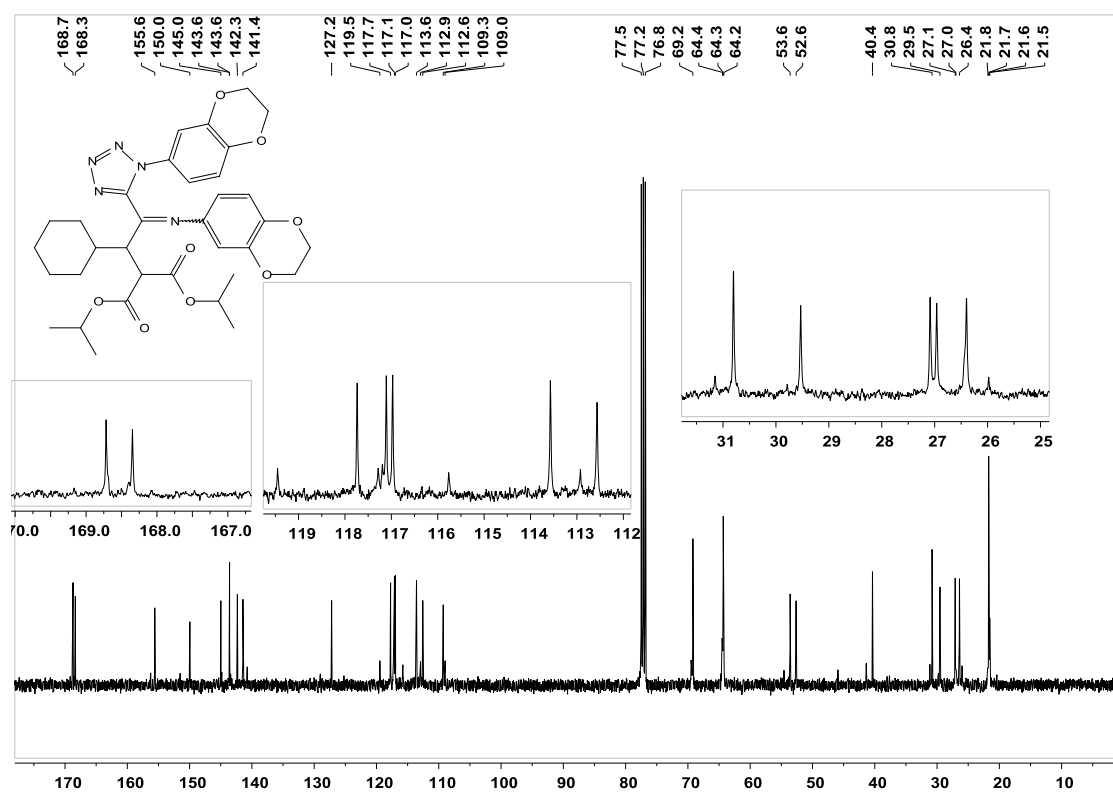

Supplementary Figure 94.  $^{13}\text{C}$  NMR spectra for product **5k**

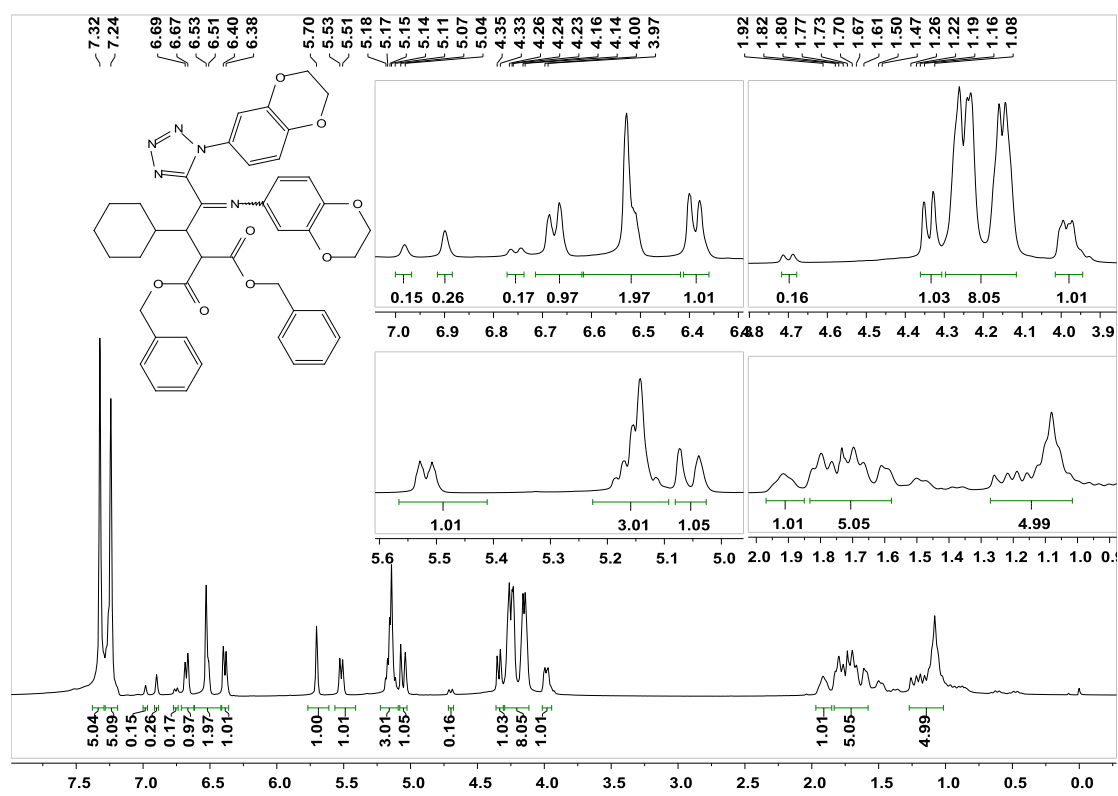

Supplementary Figure 95. <sup>1</sup>H NMR spectra for product 51

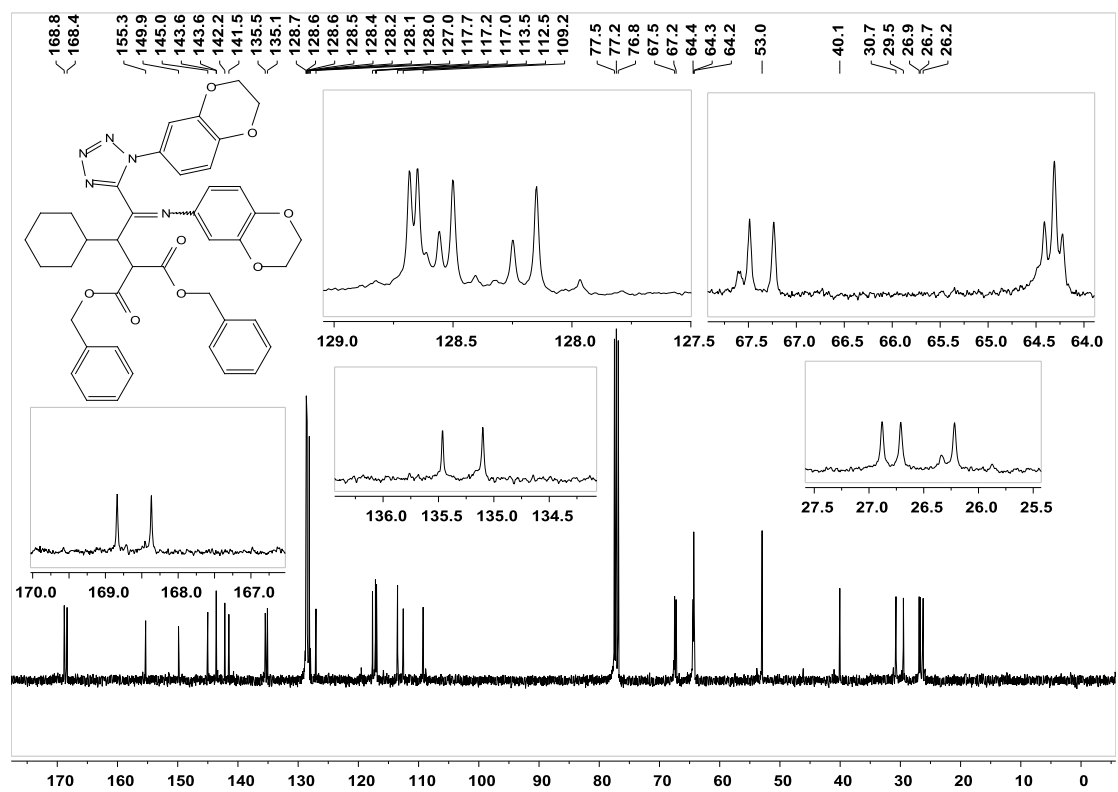

Supplementary Figure 96. <sup>13</sup>C NMR spectra for product 51

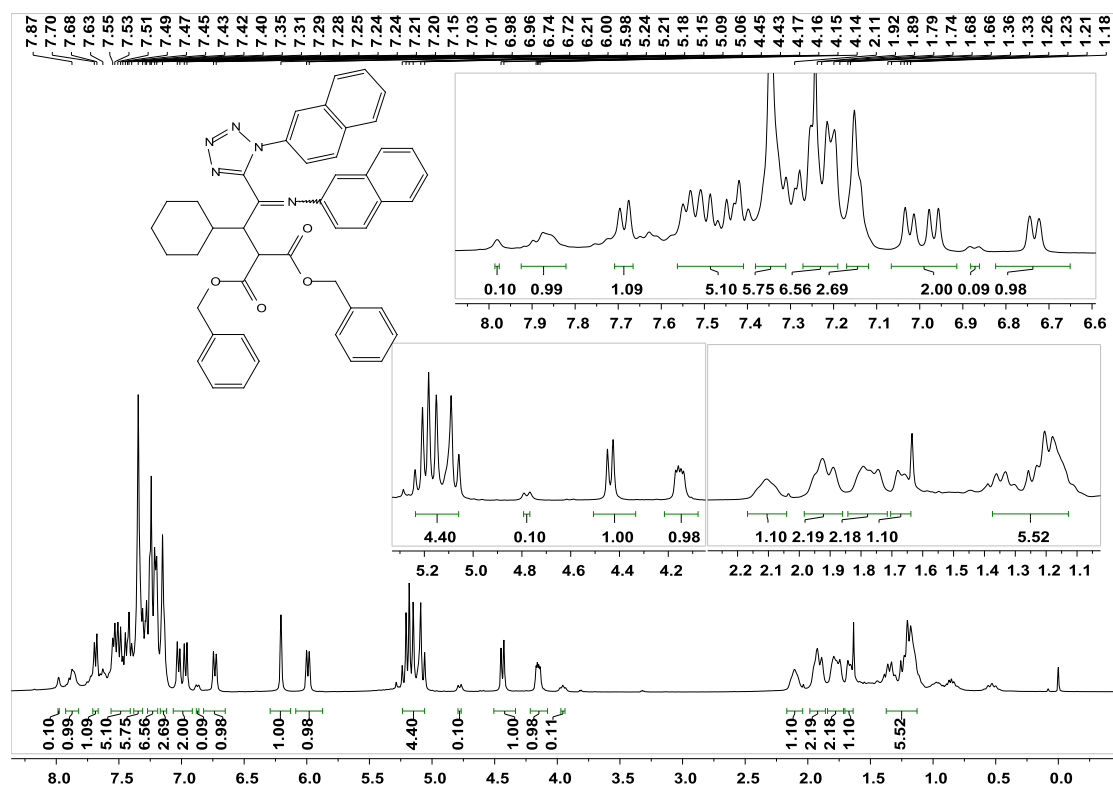

Supplementary Figure 97. <sup>1</sup>H NMR spectra for product 5m

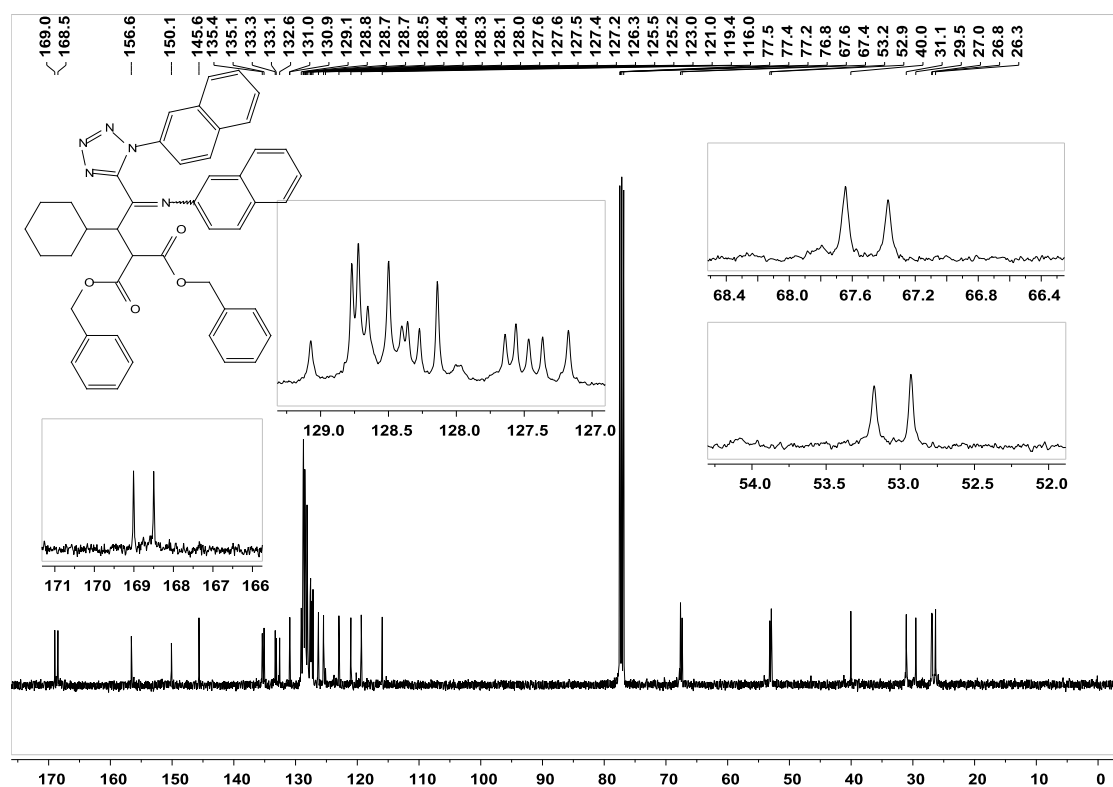

Supplementary Figure 98. <sup>13</sup>C NMR spectra for product 5m

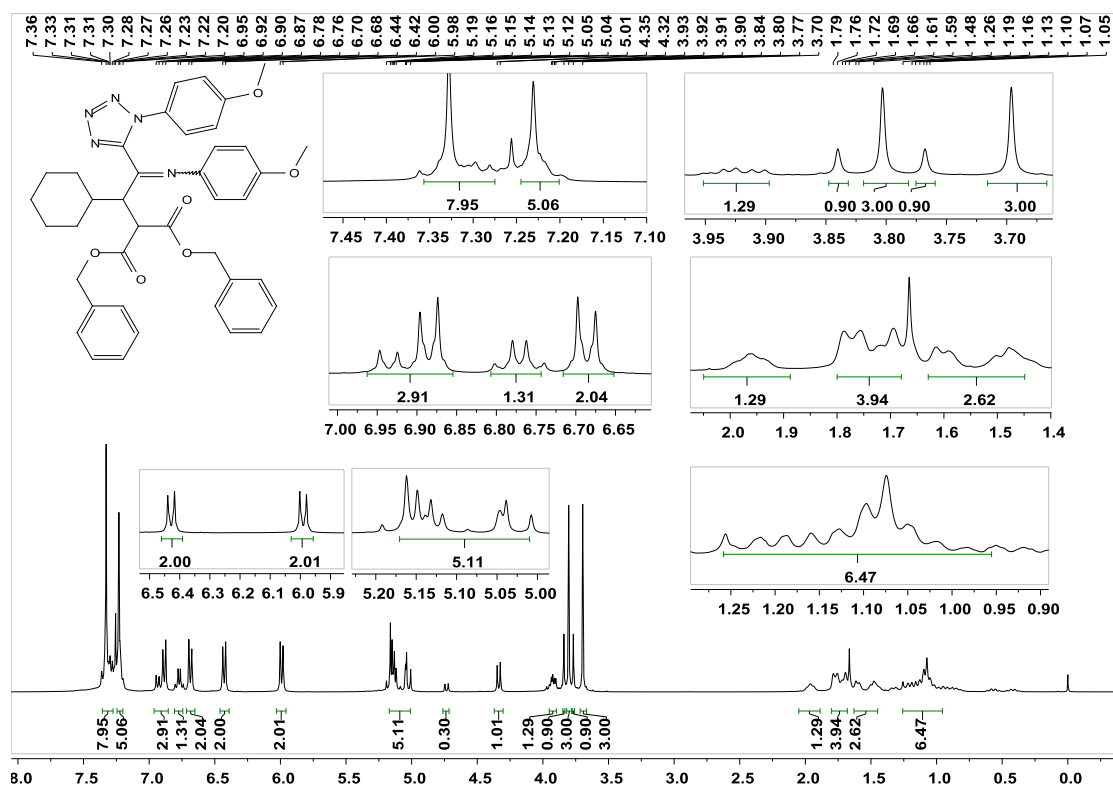

**Supplementary Figure 99. <sup>1</sup>H NMR spectra for product 5n**

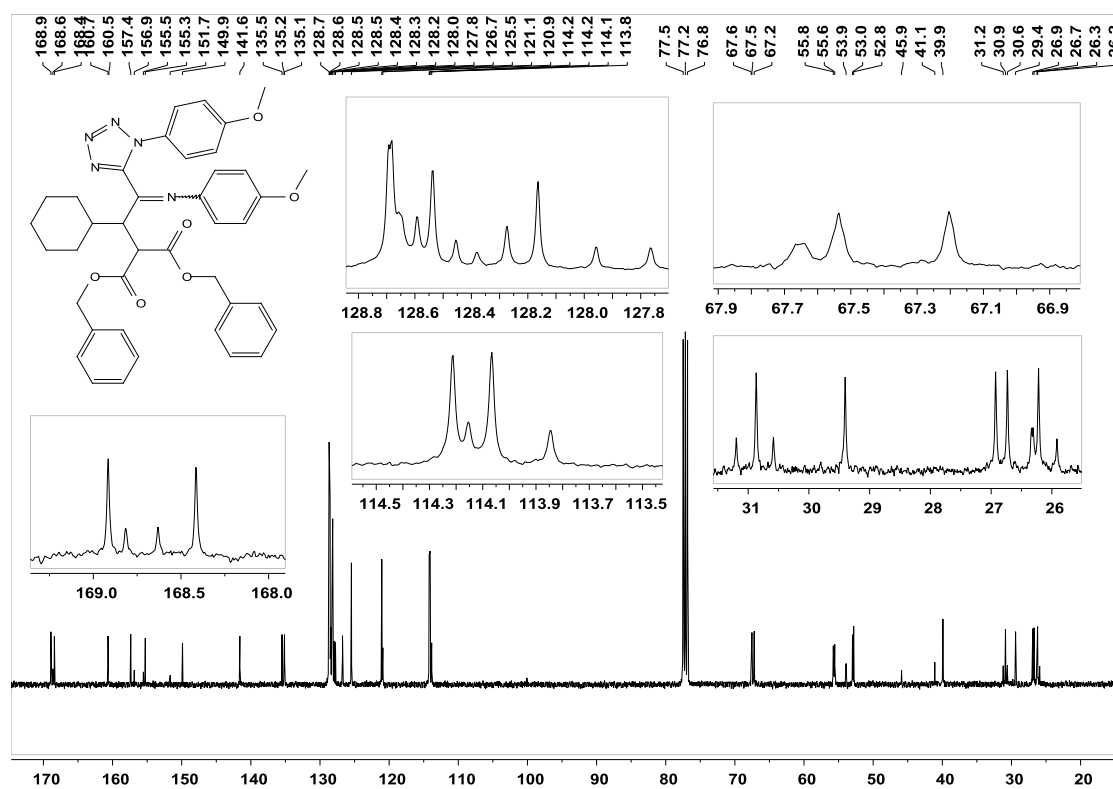

**Supplementary Figure 100. <sup>13</sup>C NMR spectra for product 5n**

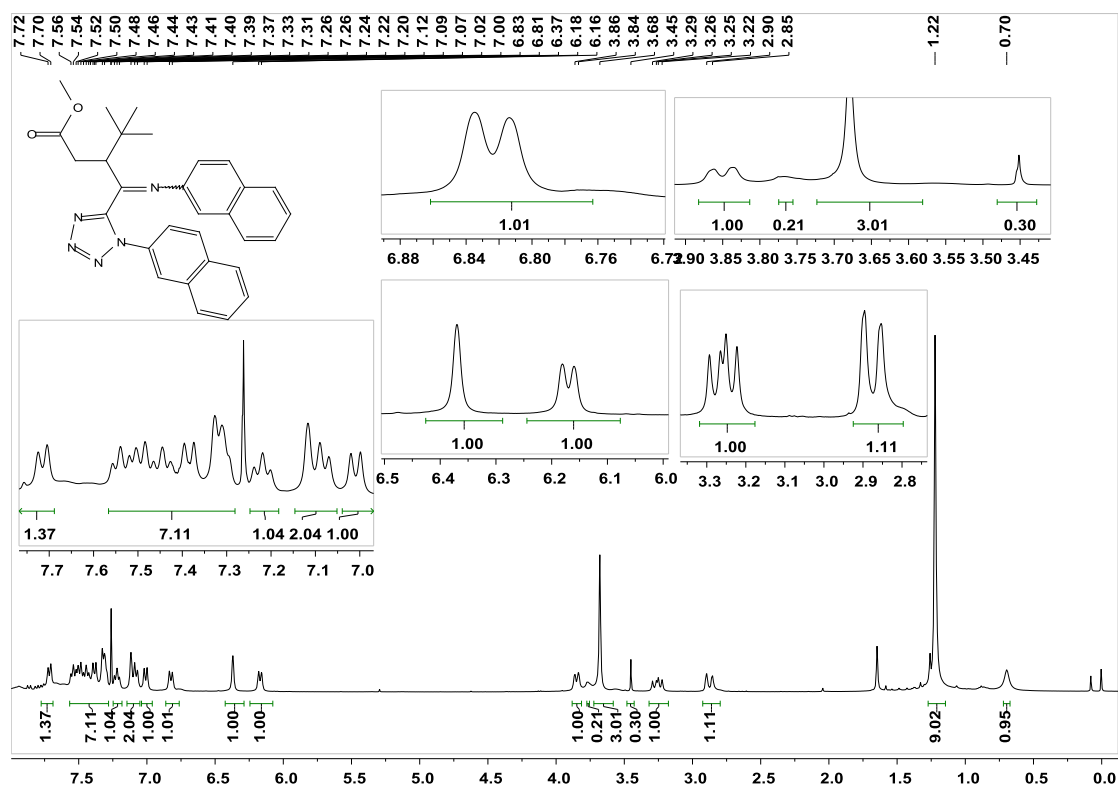

Supplementary Figure 101.  $^1\text{H}$  NMR spectra for product **6e**

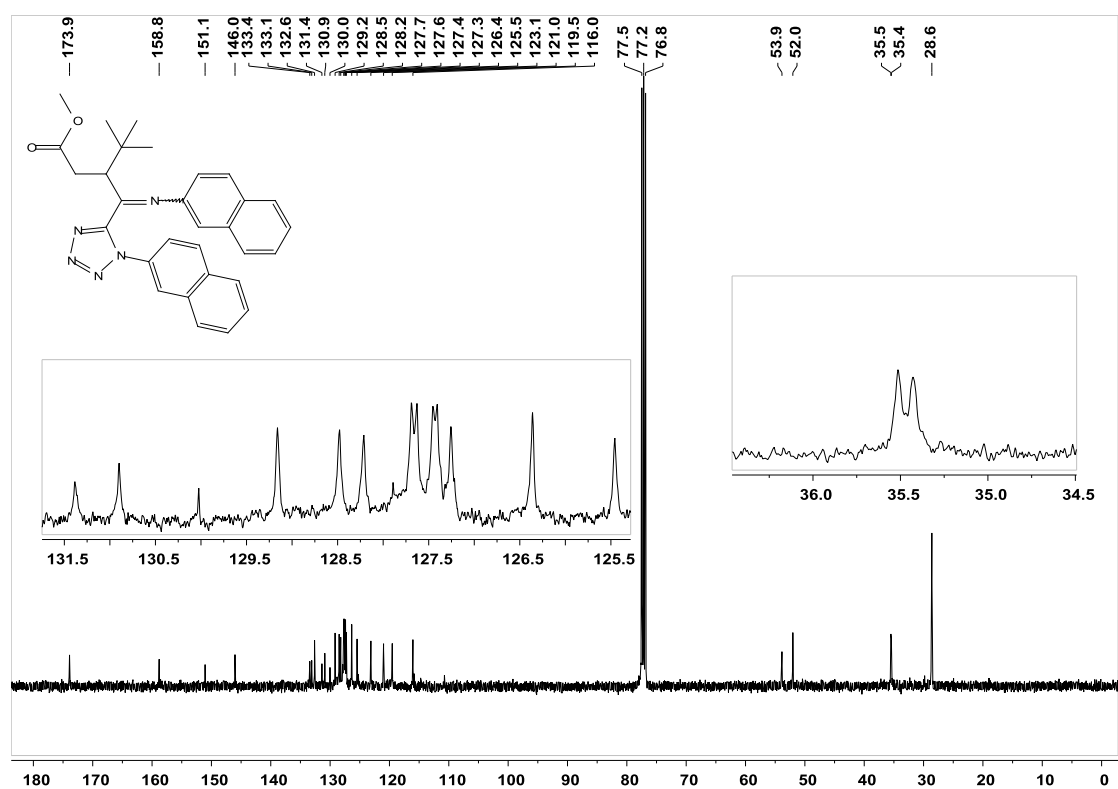

Supplementary Figure 102.  $^{13}\text{C}$  NMR spectra for product **6e**

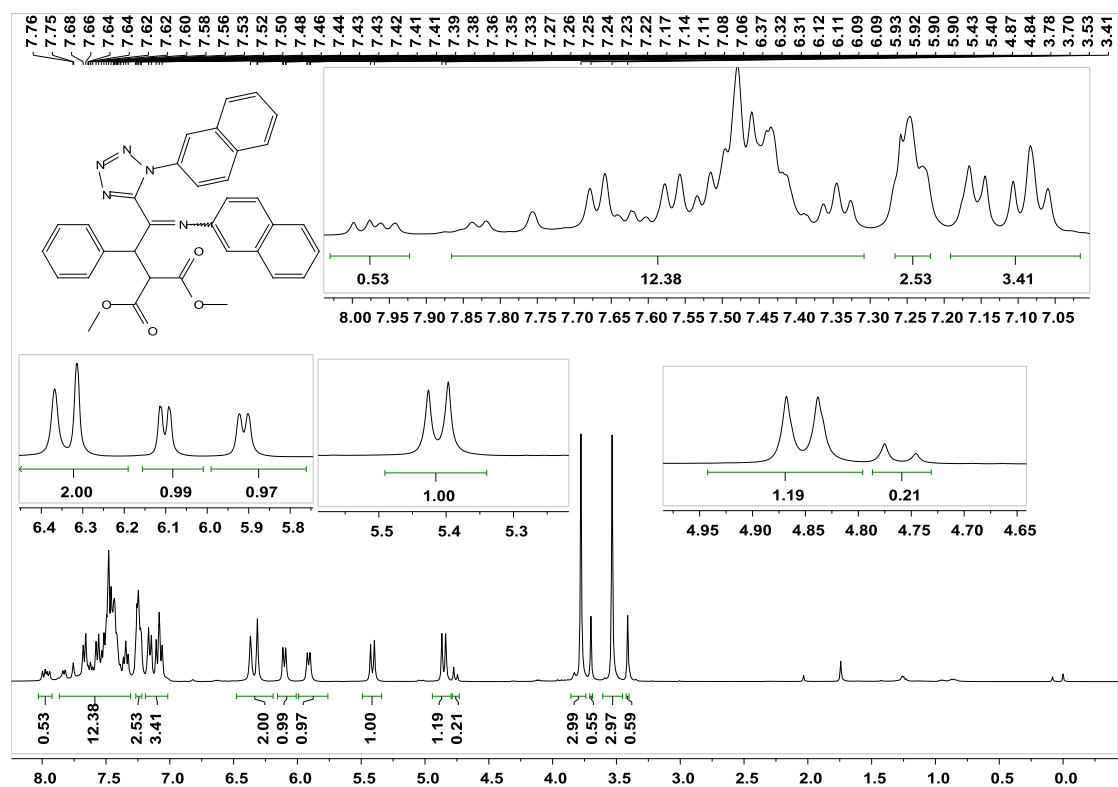

Supplementary Figure 103.  $^1\text{H}$  NMR spectra for product **5o**

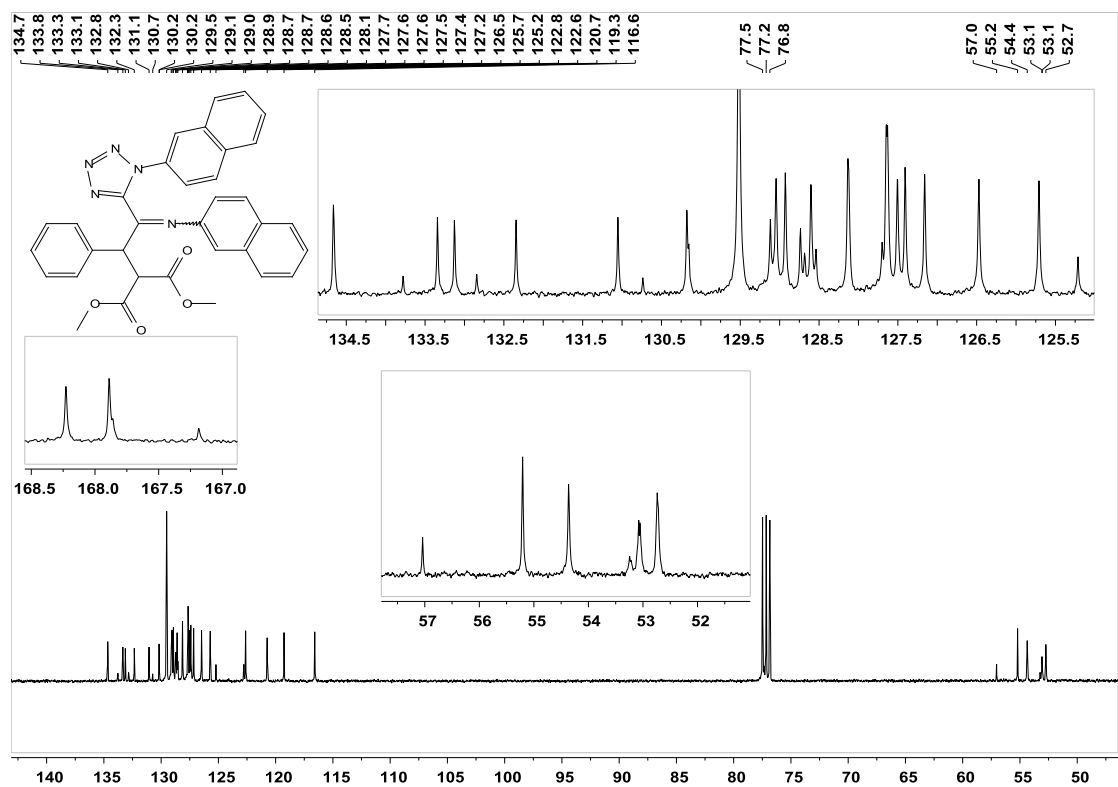

Supplementary Figure 104.  $^{13}\text{C}$  NMR spectra for product **5o**

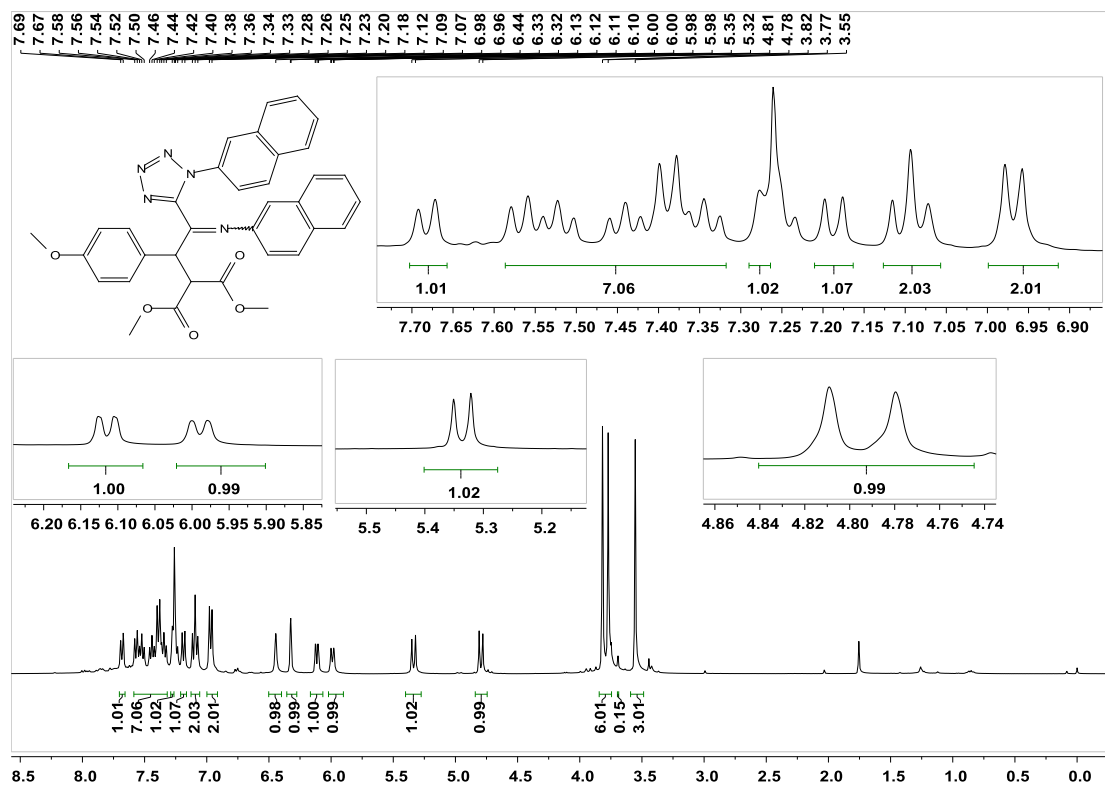

Supplementary Figure 105. <sup>1</sup>H NMR spectra for product **5p**

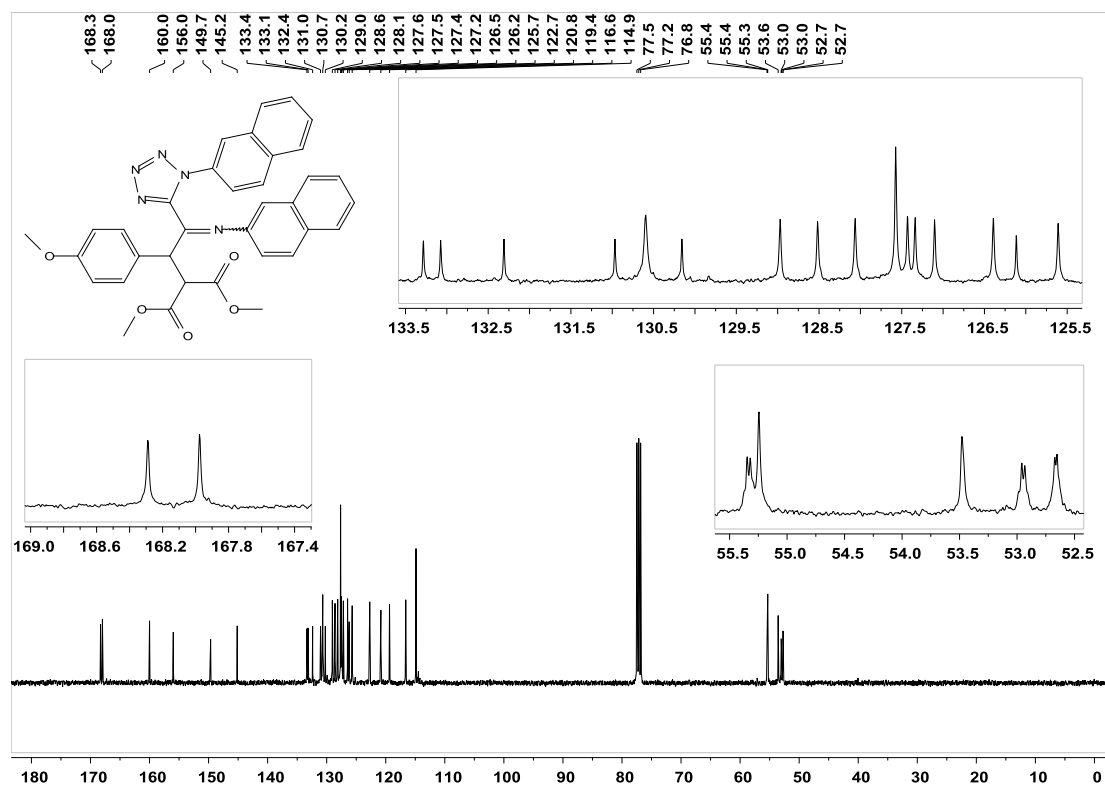

Supplementary Figure 106. <sup>13</sup>C NMR spectra for product **5p**



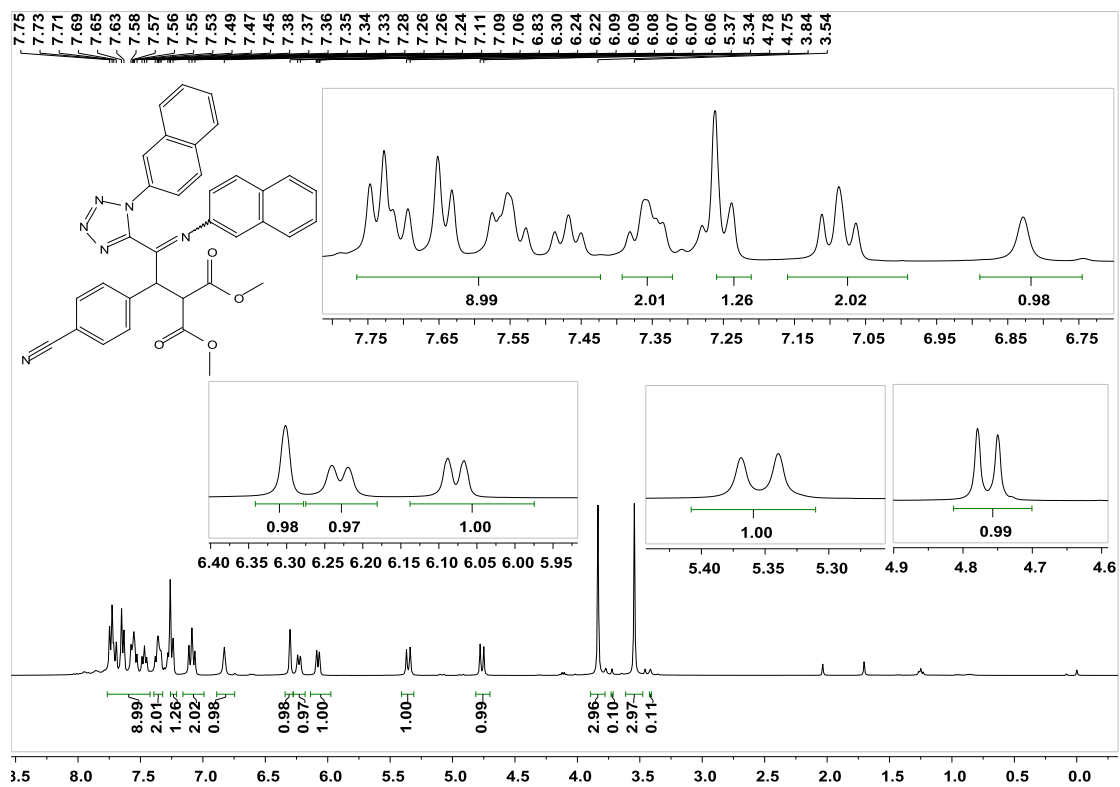

Supplementary Figure 107. <sup>1</sup>H NMR spectra for product 5q

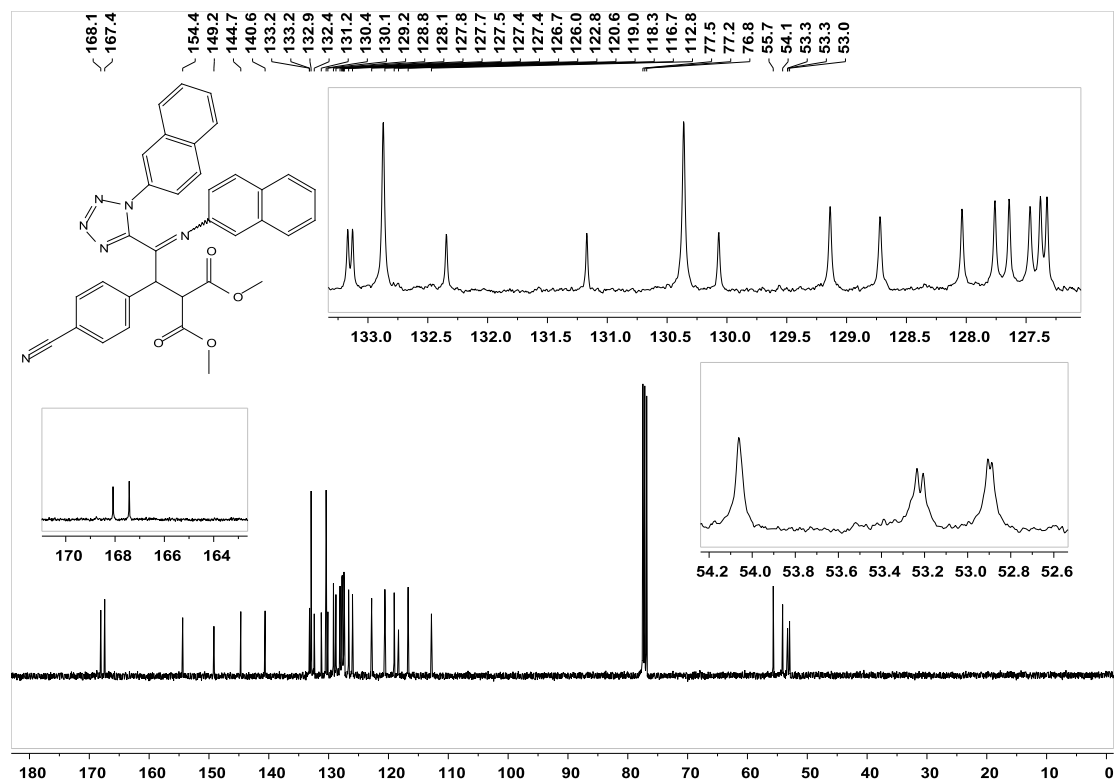

Supplementary Figure 108. <sup>13</sup>C NMR spectra for product 5q

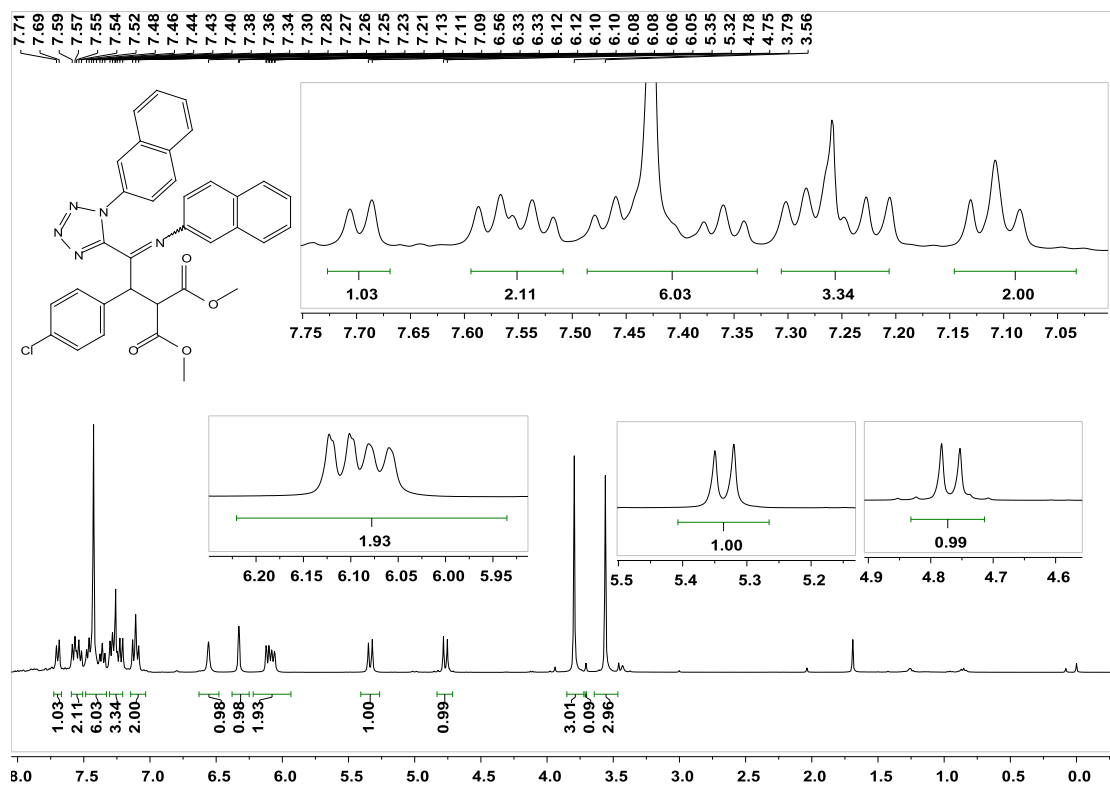

Supplementary Figure 109. <sup>1</sup>H NMR spectra for product **5r**

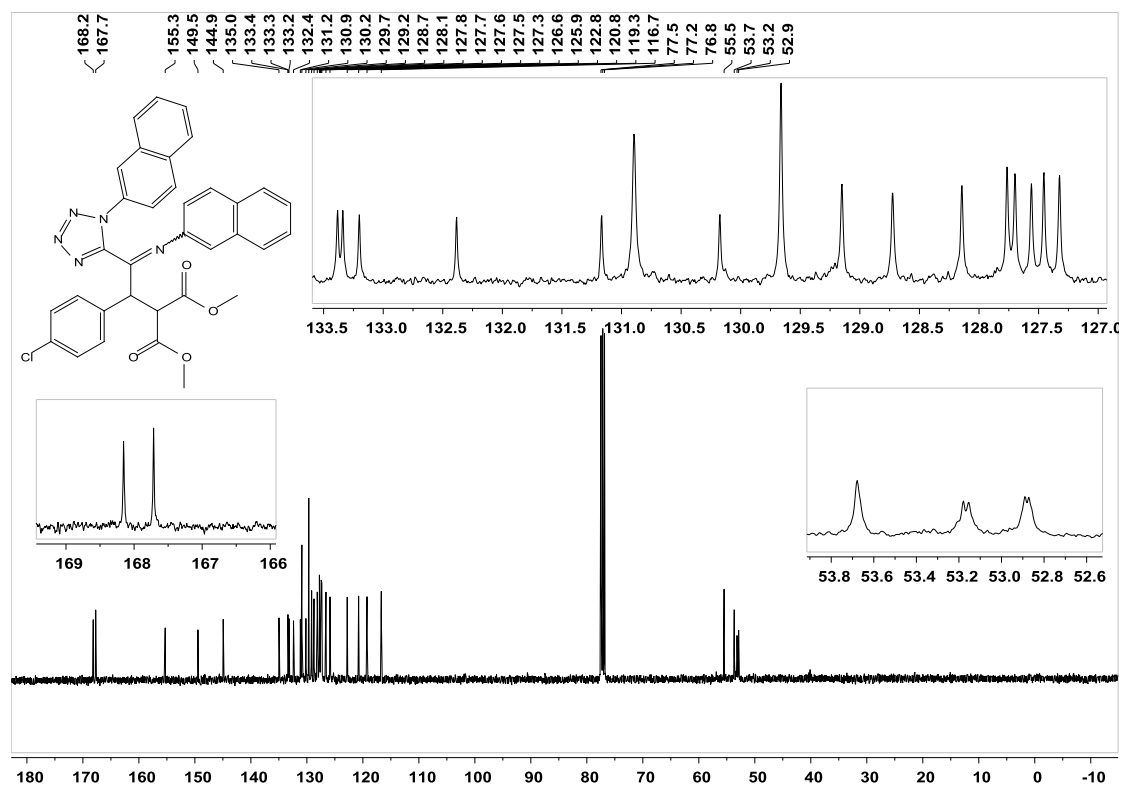

Supplementary Figure 110. <sup>13</sup>C NMR spectra for product **5r**

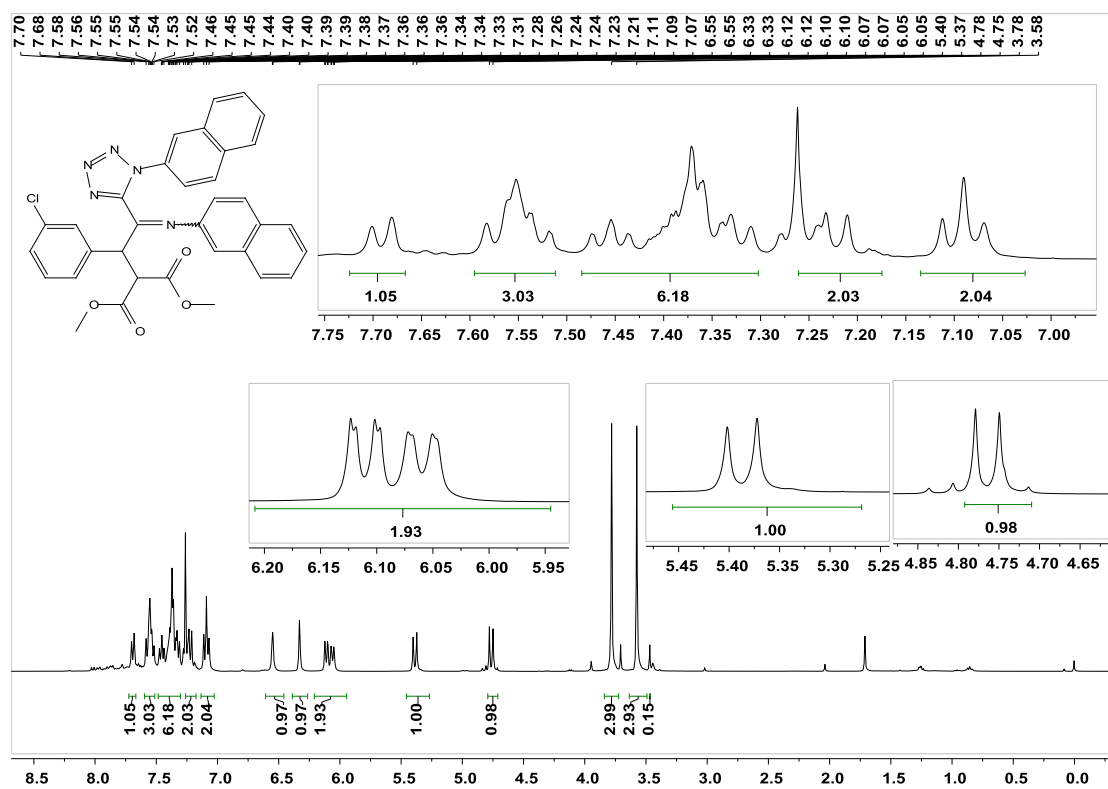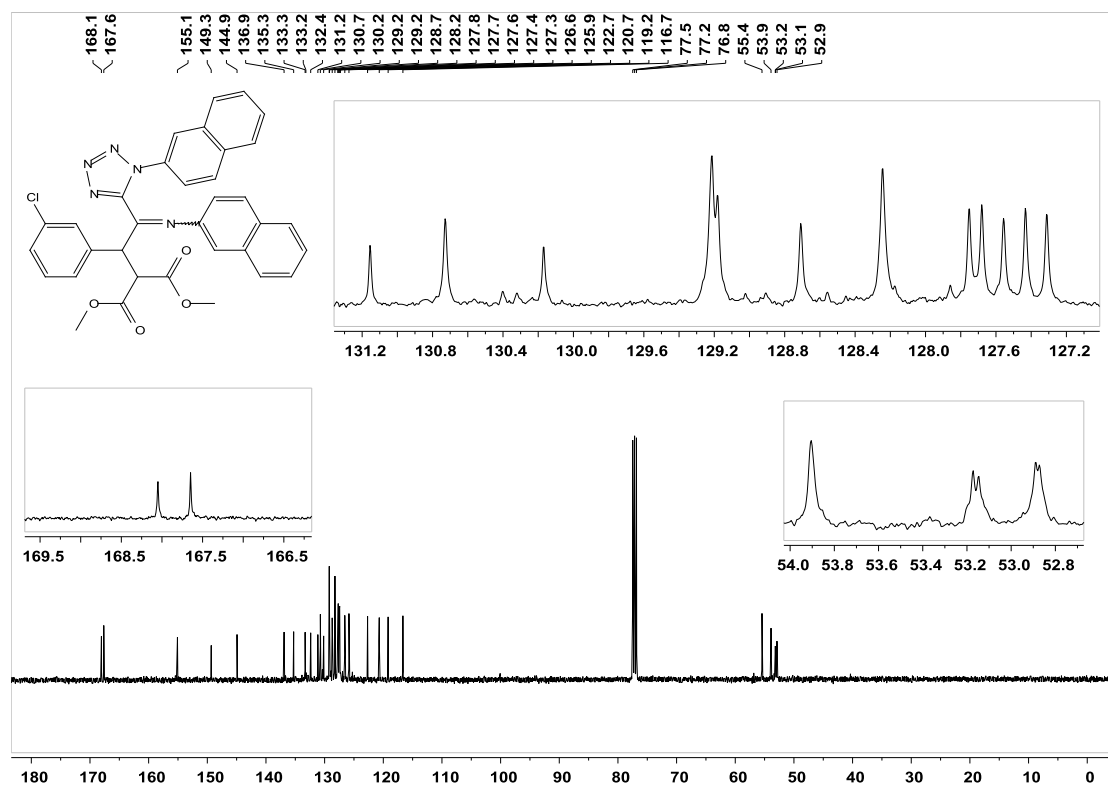

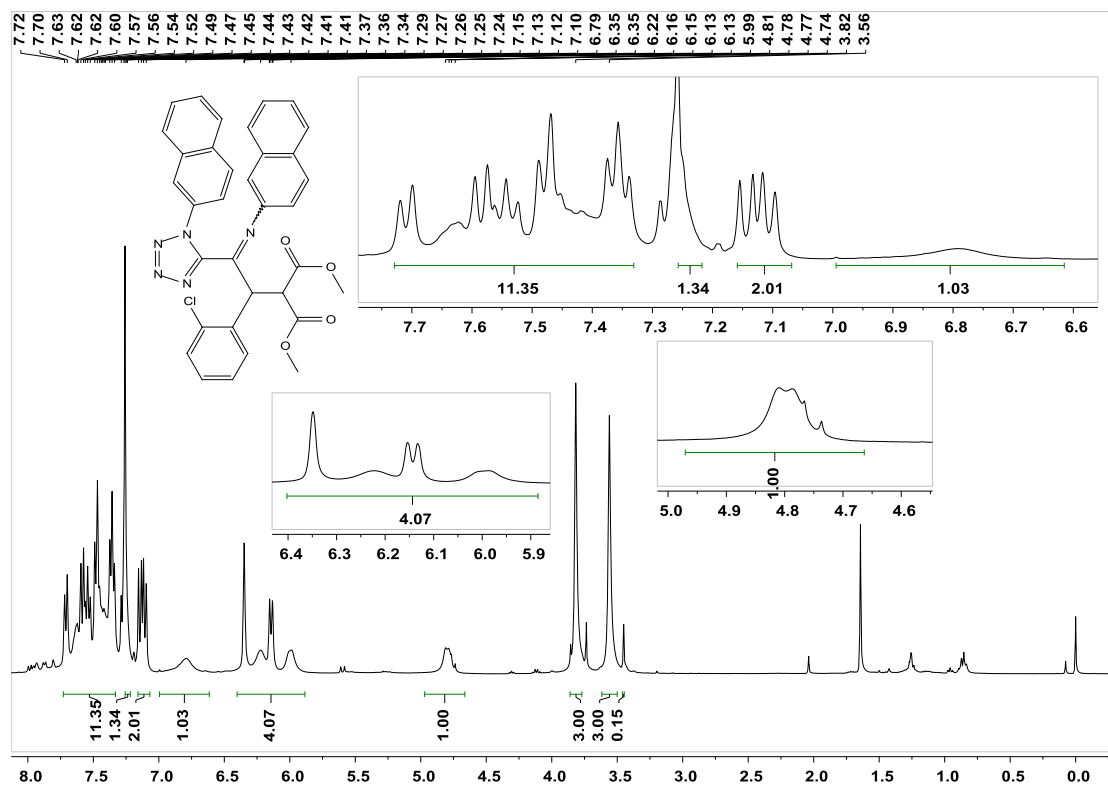

Supplementary Figure 113.  $^1\text{H}$  NMR spectra for product **5t**

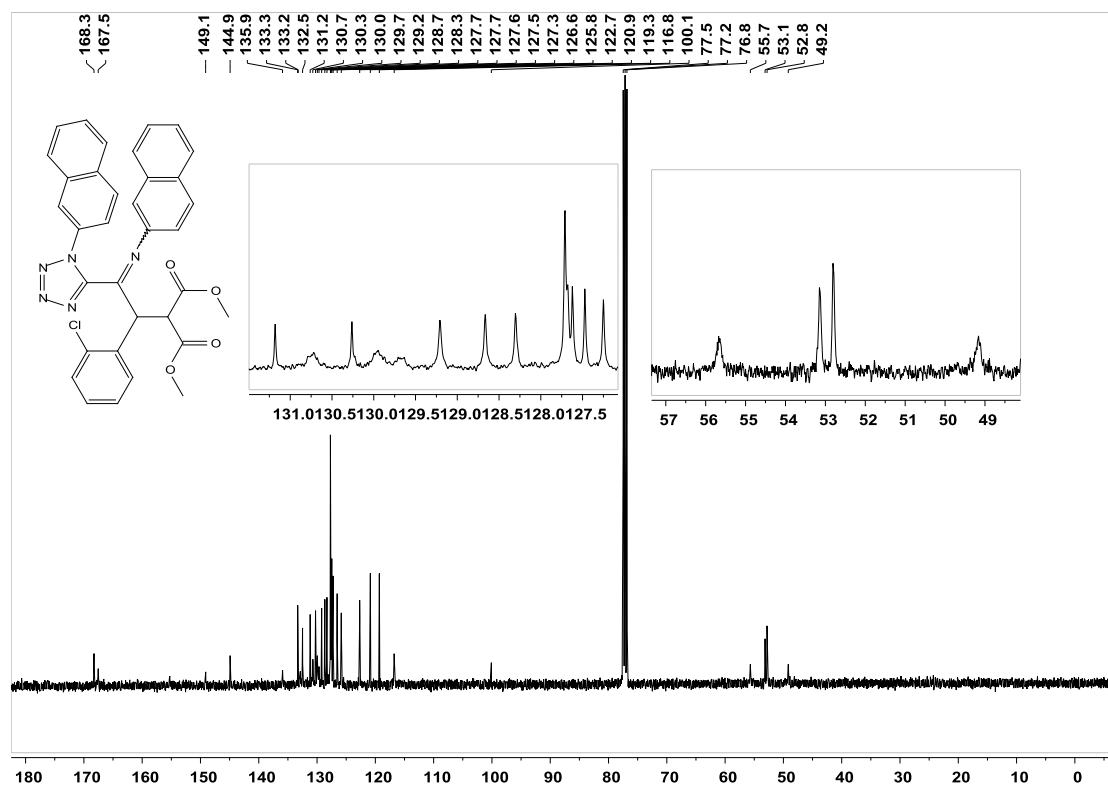

Supplementary Figure 114.  $^{13}\text{C}$  NMR spectra for product **5t**

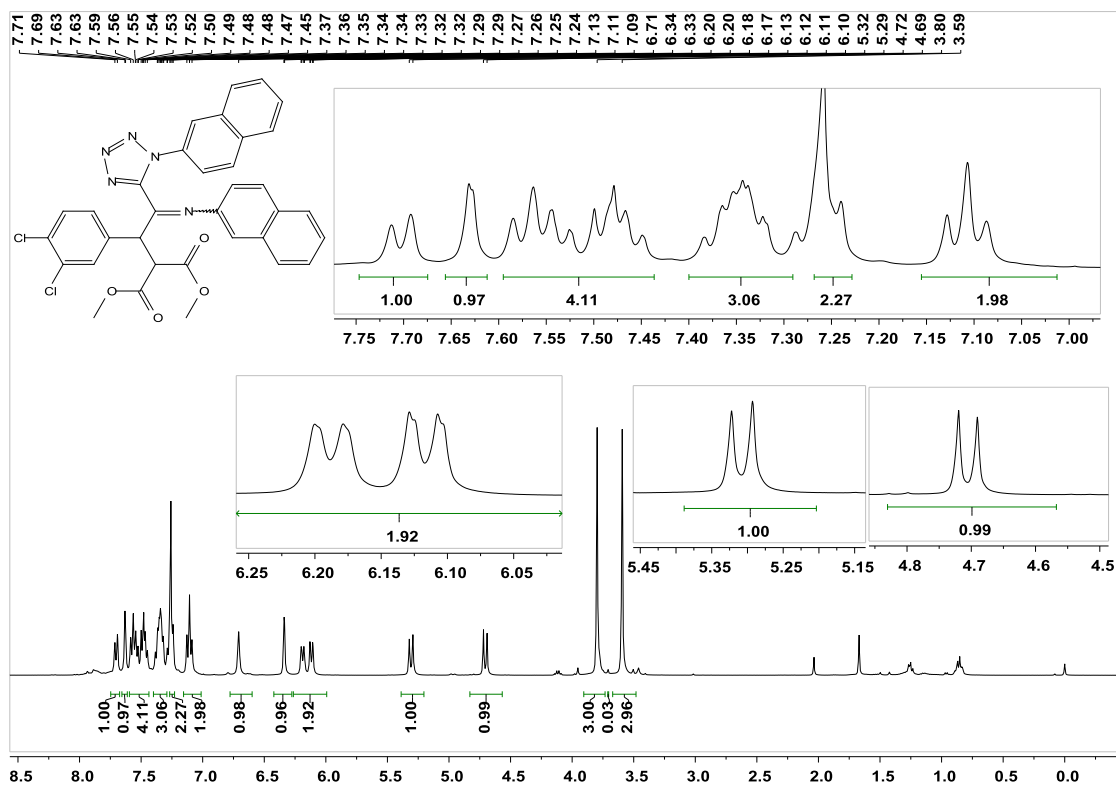

**Supplementary Figure 115.** <sup>1</sup>H NMR spectra for product **5u**

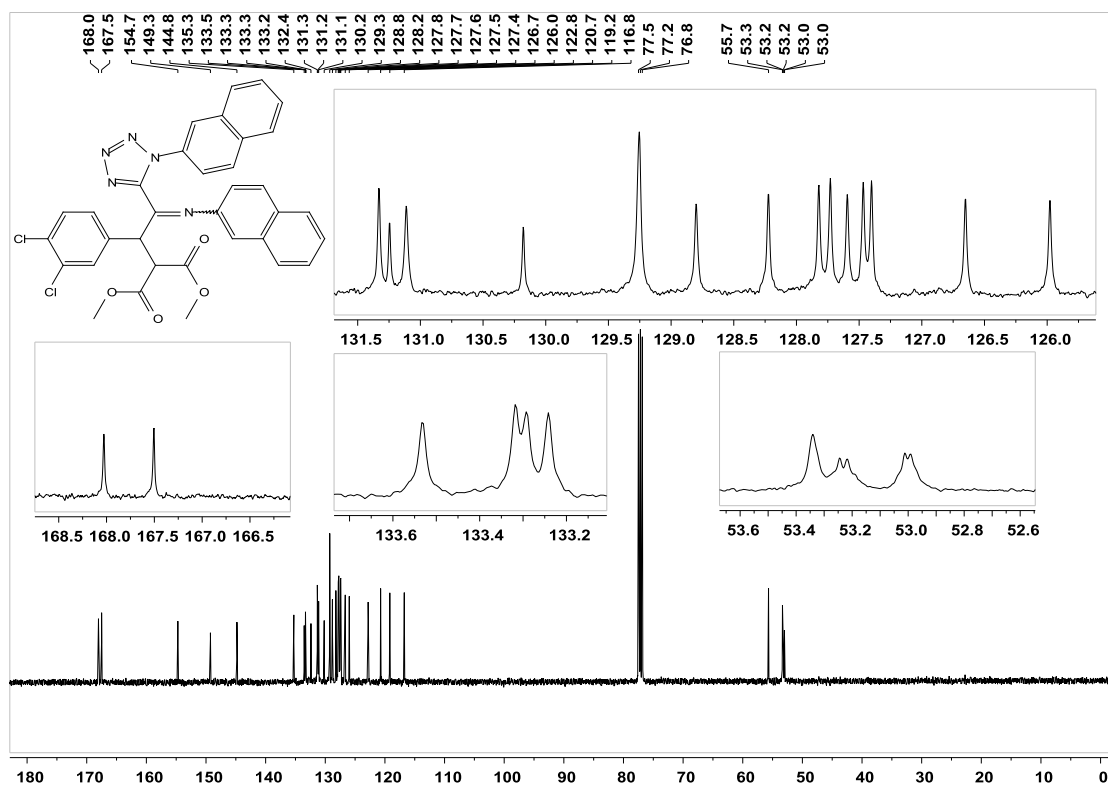

**Supplementary Figure 116.** <sup>13</sup>C NMR spectra for product **5u**

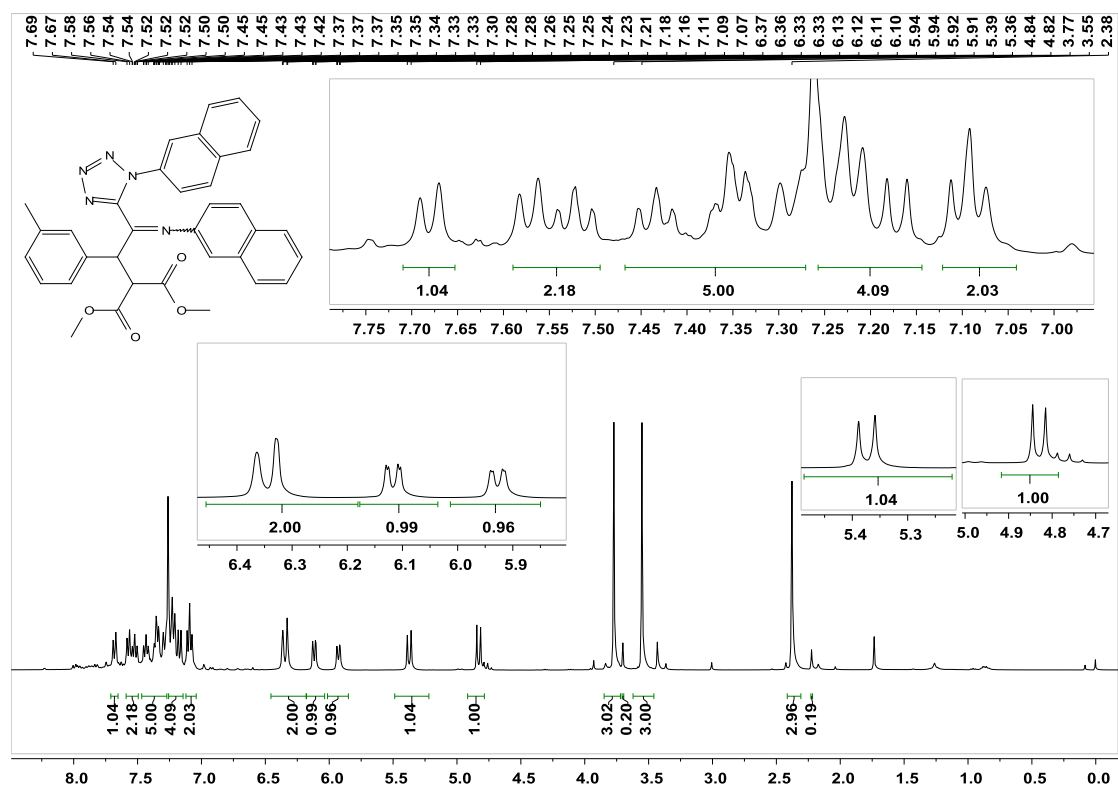

**Supplementary Figure 117.  $^1\text{H}$  NMR spectra for product **5v****

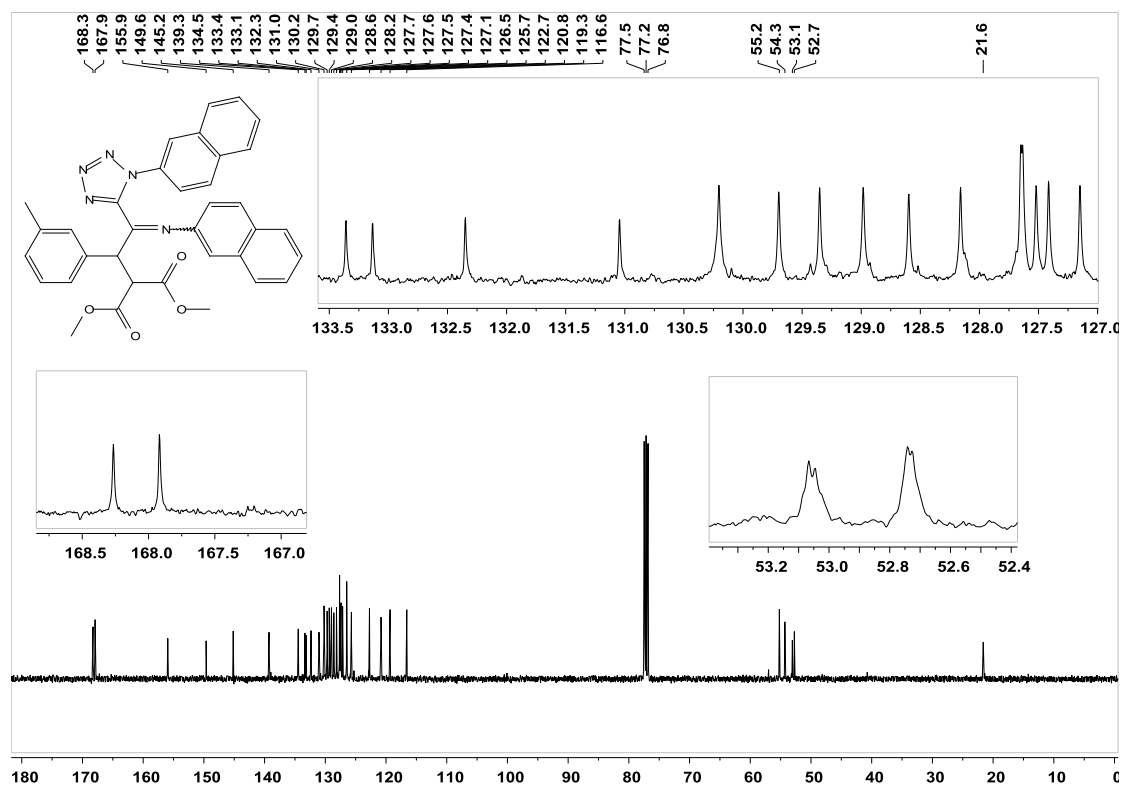

**Supplementary Figure 118.  $^{13}\text{C}$  NMR spectra for product **5v****

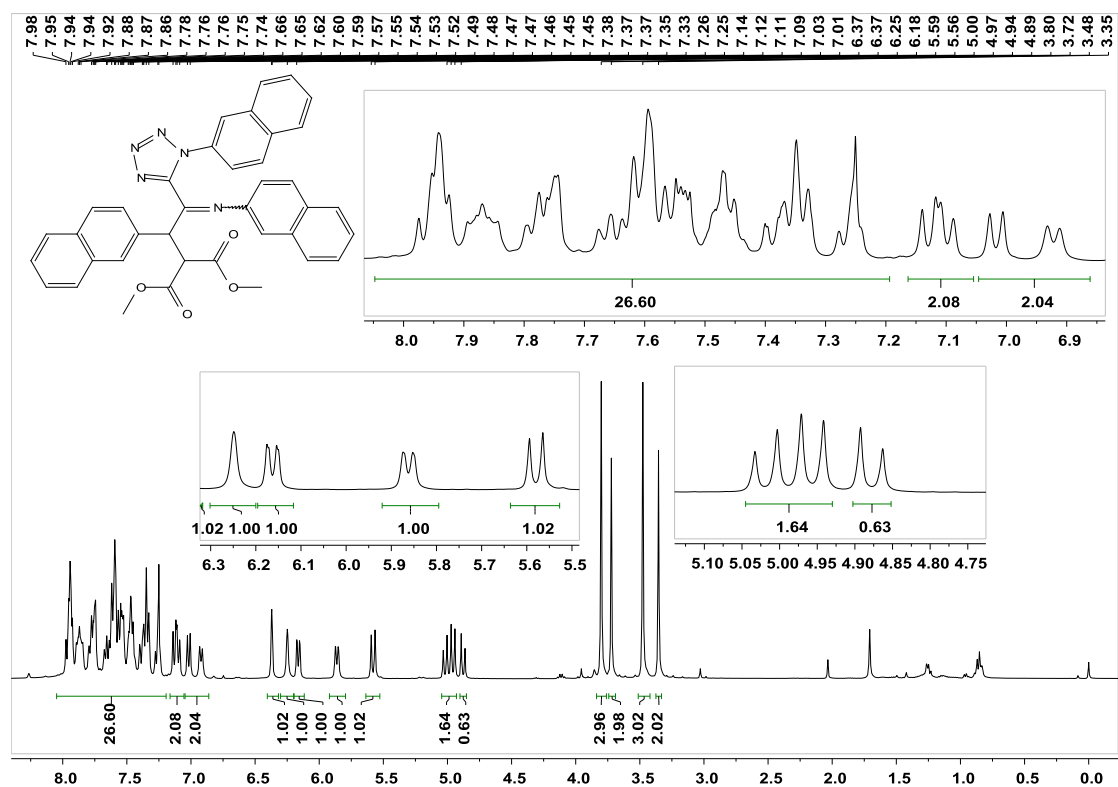

Supplementary Figure 119.  $^1\text{H}$  NMR spectra for product **5w**

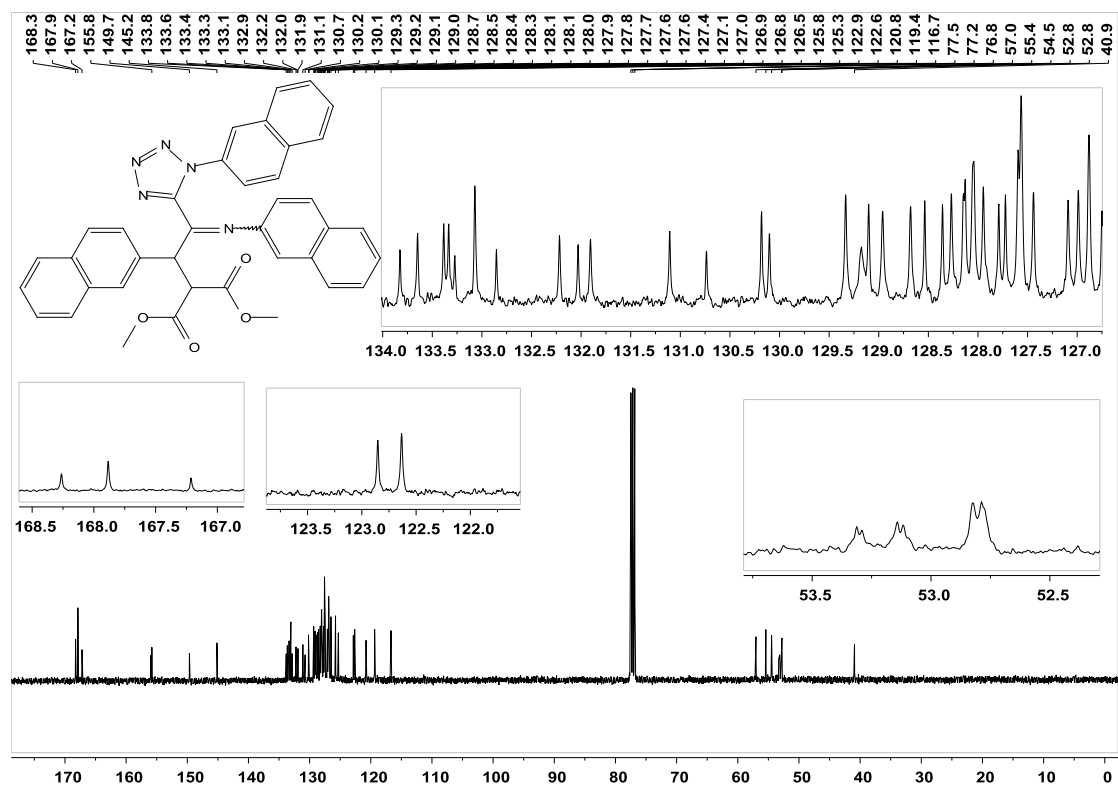

Supplementary Figure 120.  $^{13}\text{C}$  NMR spectra for product **5w**

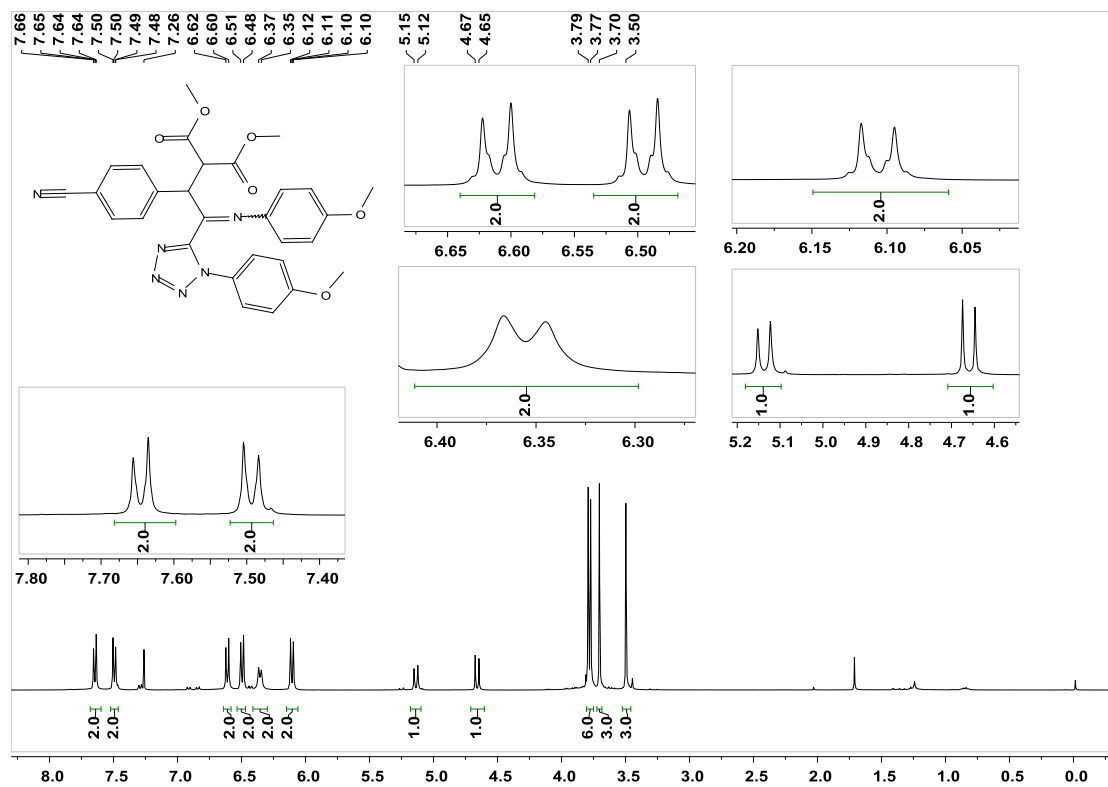

Supplementary Figure 121.  $^1\text{H}$  NMR spectra for product **5x**

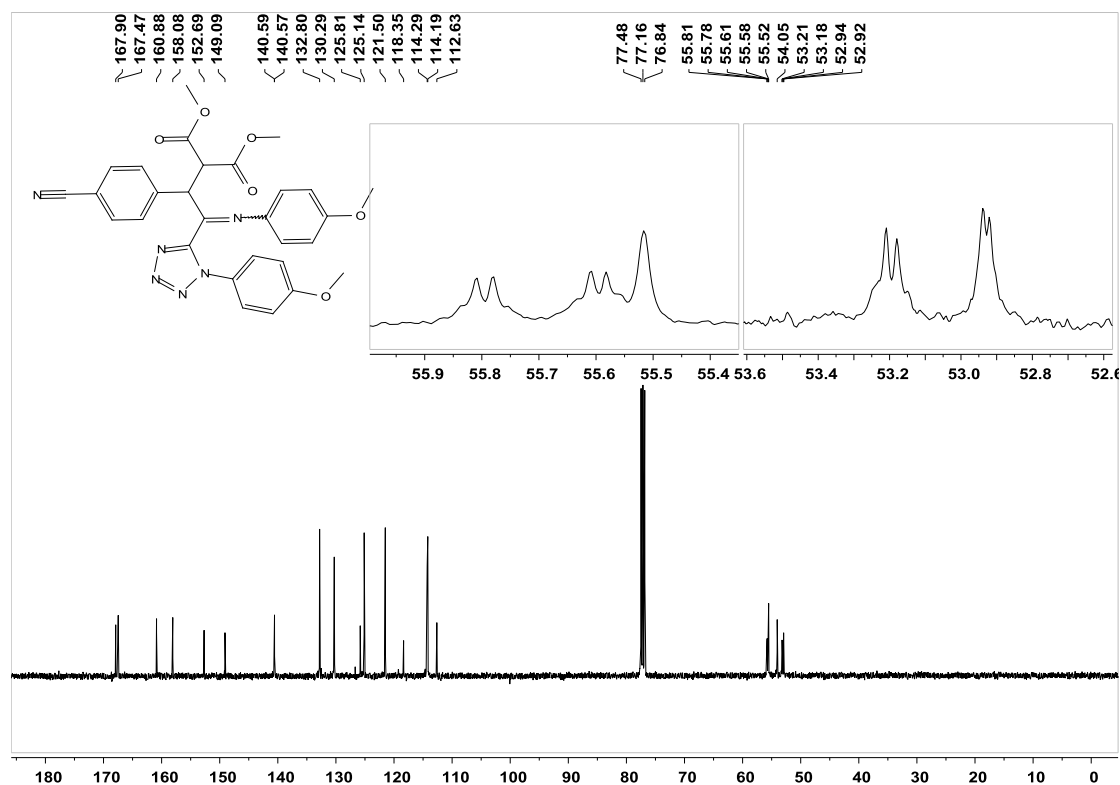

Supplementary Figure 122.  $^{13}\text{C}$  NMR spectra for product **5x**



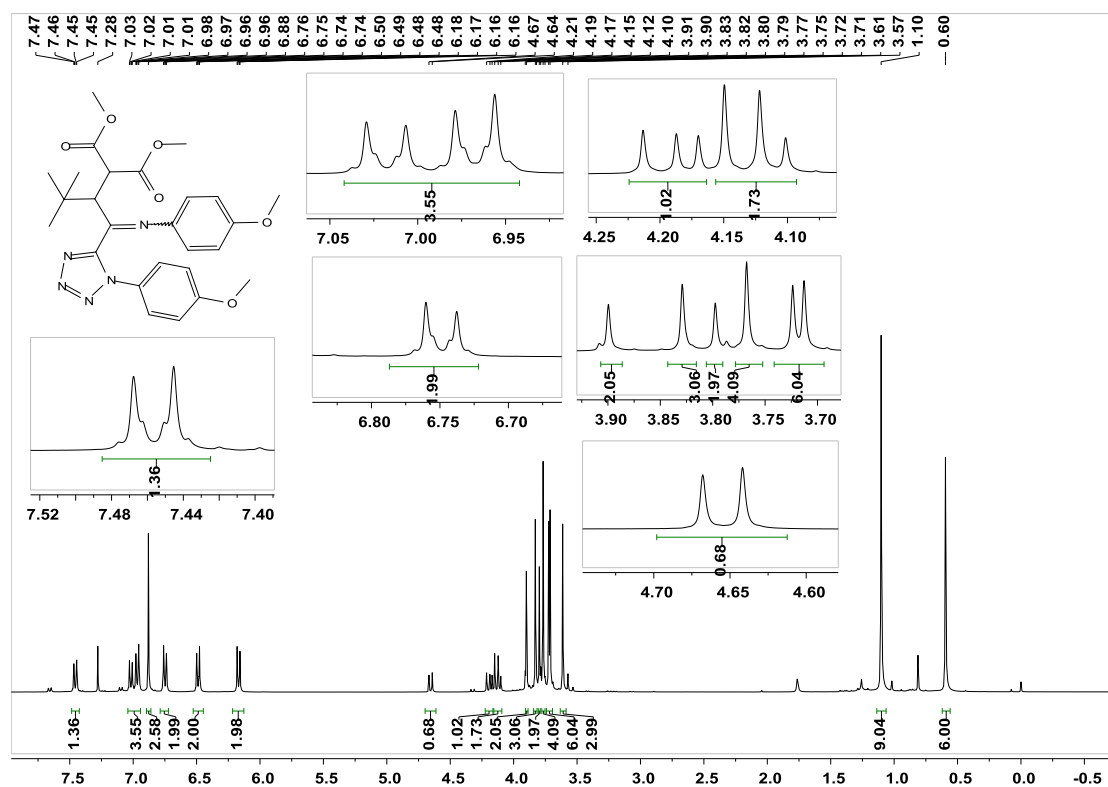

**Supplementary Figure 123.  $^1\text{H}$  NMR spectra for product **5z****

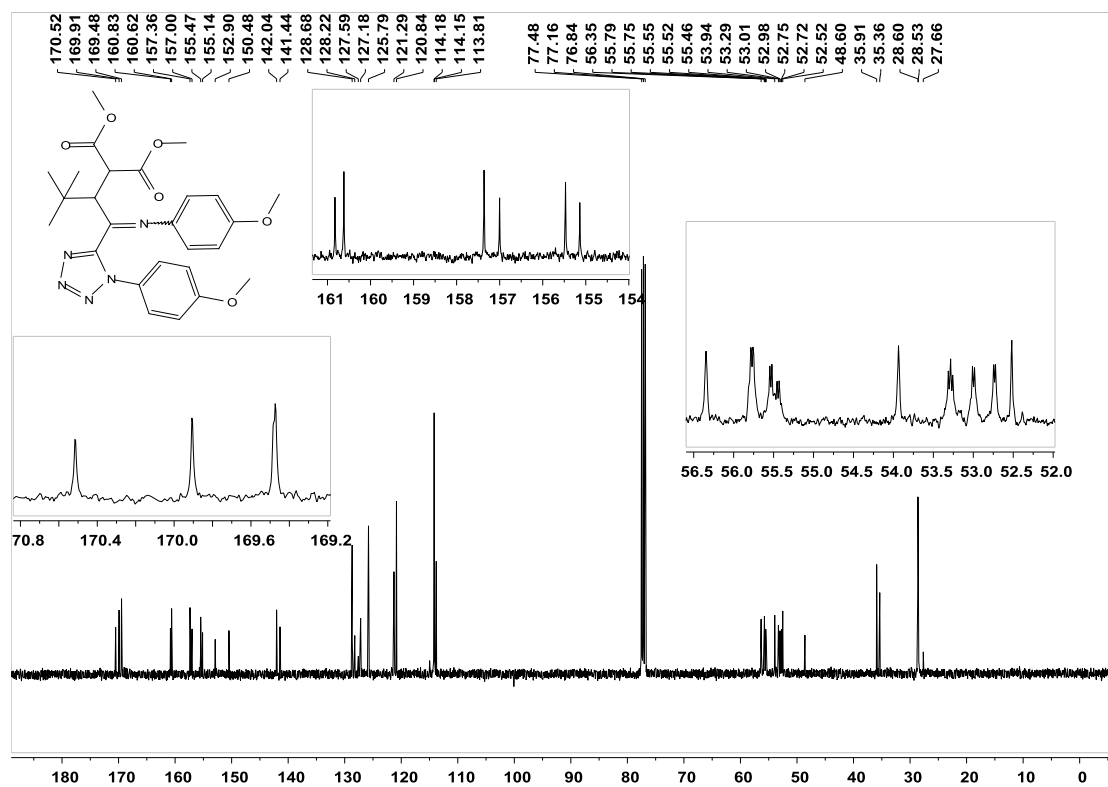

**Supplementary Figure 124.  $^{13}\text{C}$  NMR spectra for product **5z****

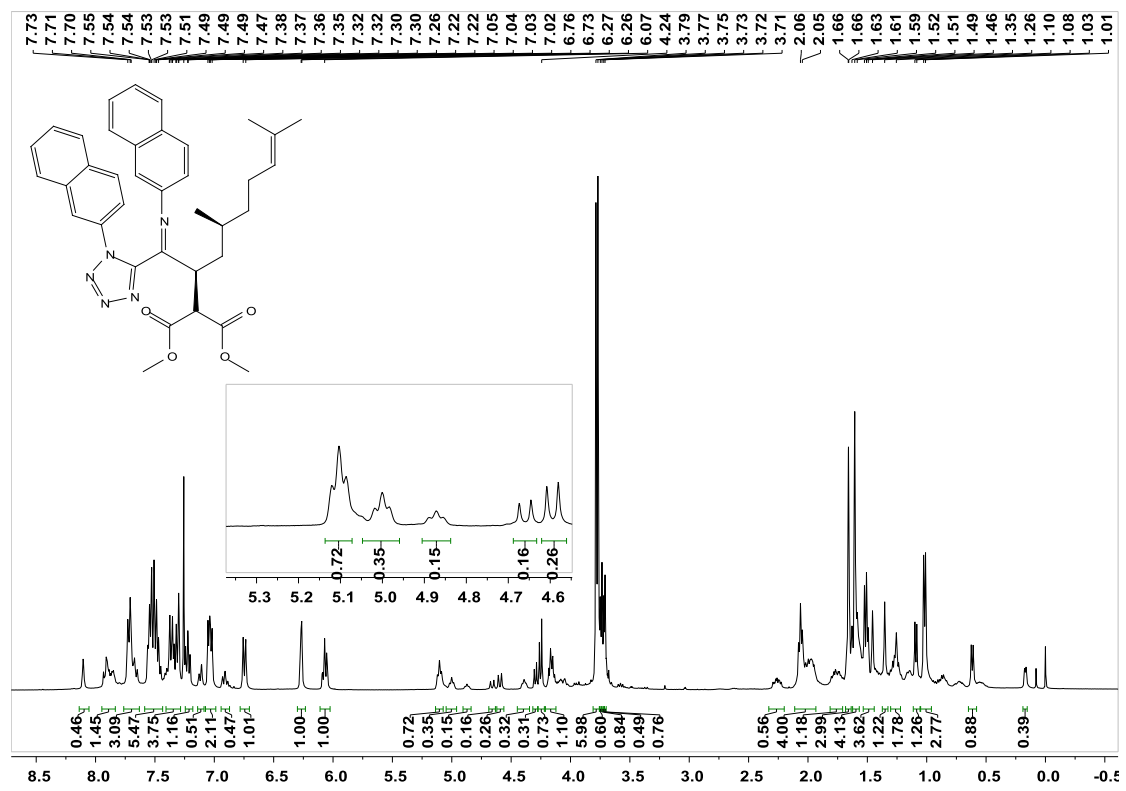

Supplementary Figure 125. <sup>1</sup>H NMR spectra for product **5y-L-RaPr<sub>2</sub>**

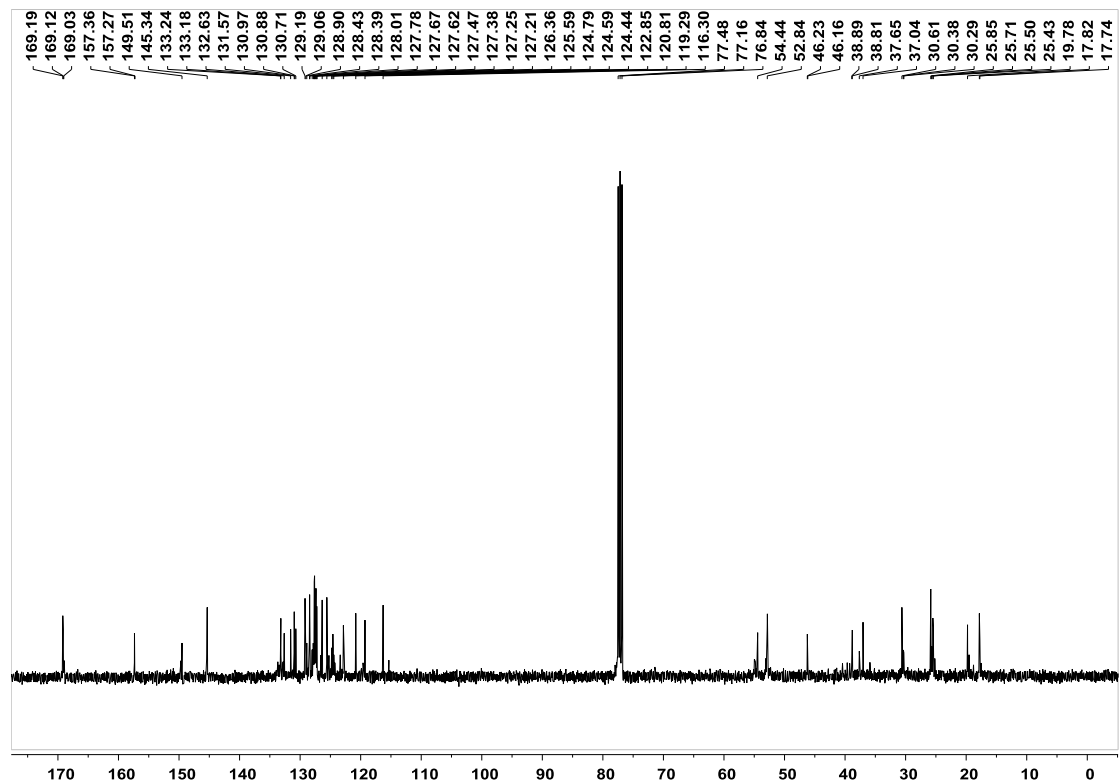

Supplementary Figure 126. <sup>13</sup>C NMR spectra for product **5y-L-RaPr<sub>2</sub>**

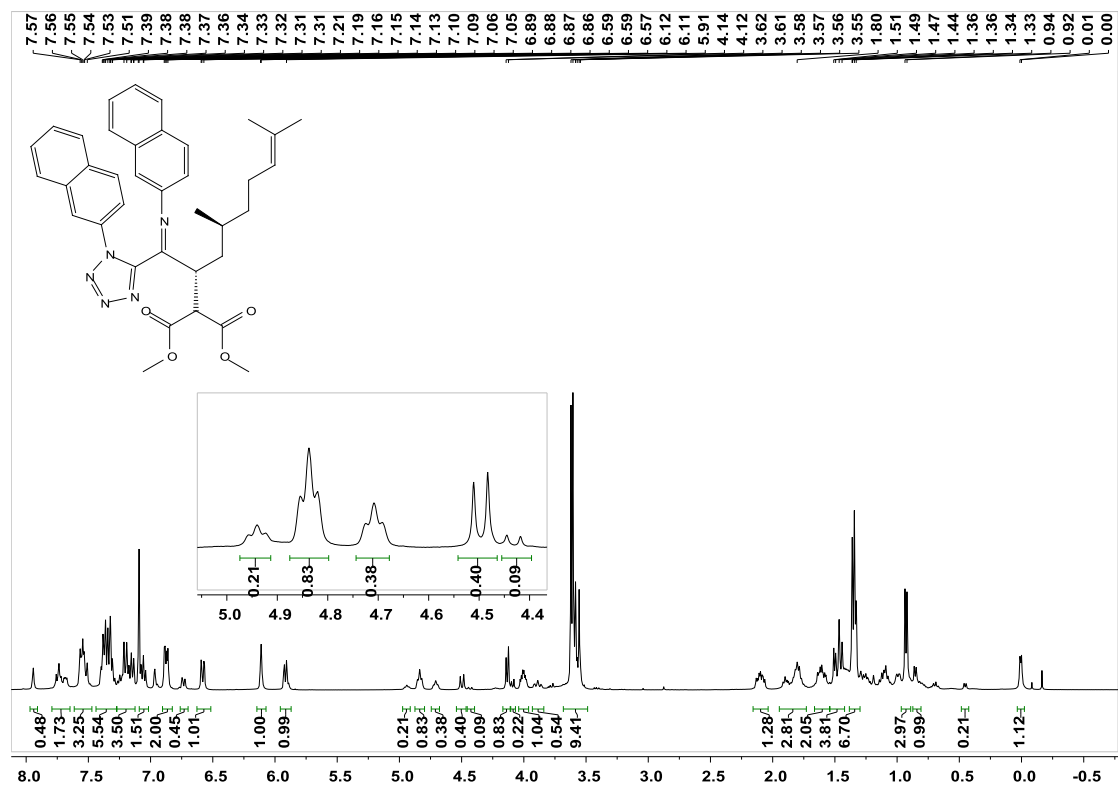

Supplementary Figure 127. <sup>1</sup>H NMR spectra for product **5y-ent-L-RaPr<sub>2</sub>**

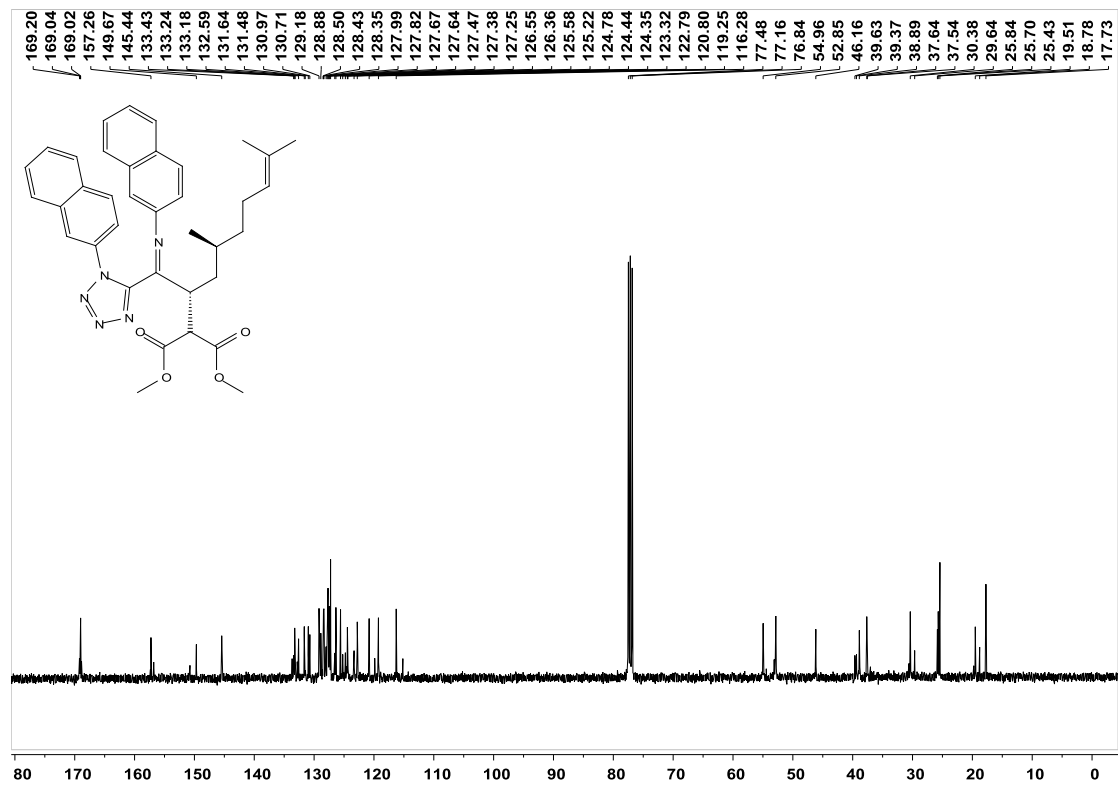

Supplementary Figure 128. <sup>13</sup>C NMR spectra for product **5y-ent-L-RaPr<sub>2</sub>**

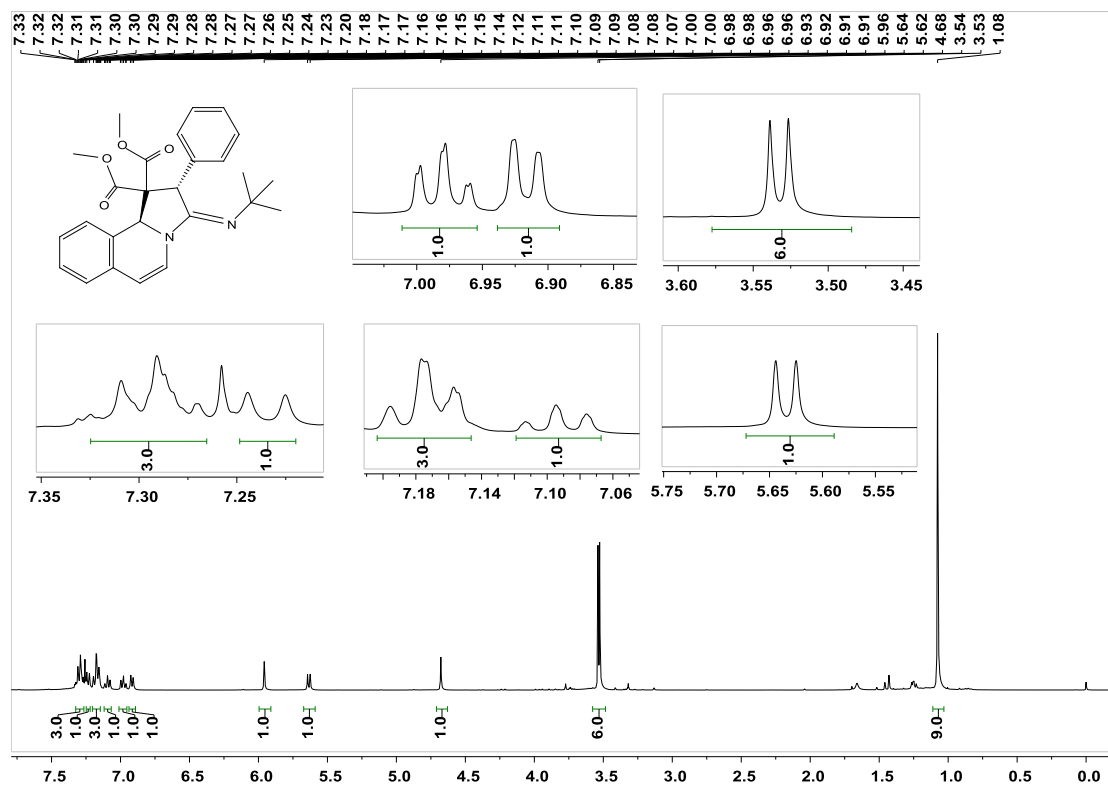

Supplementary Figure 129.  $^1\text{H}$  NMR spectra for product **8a**

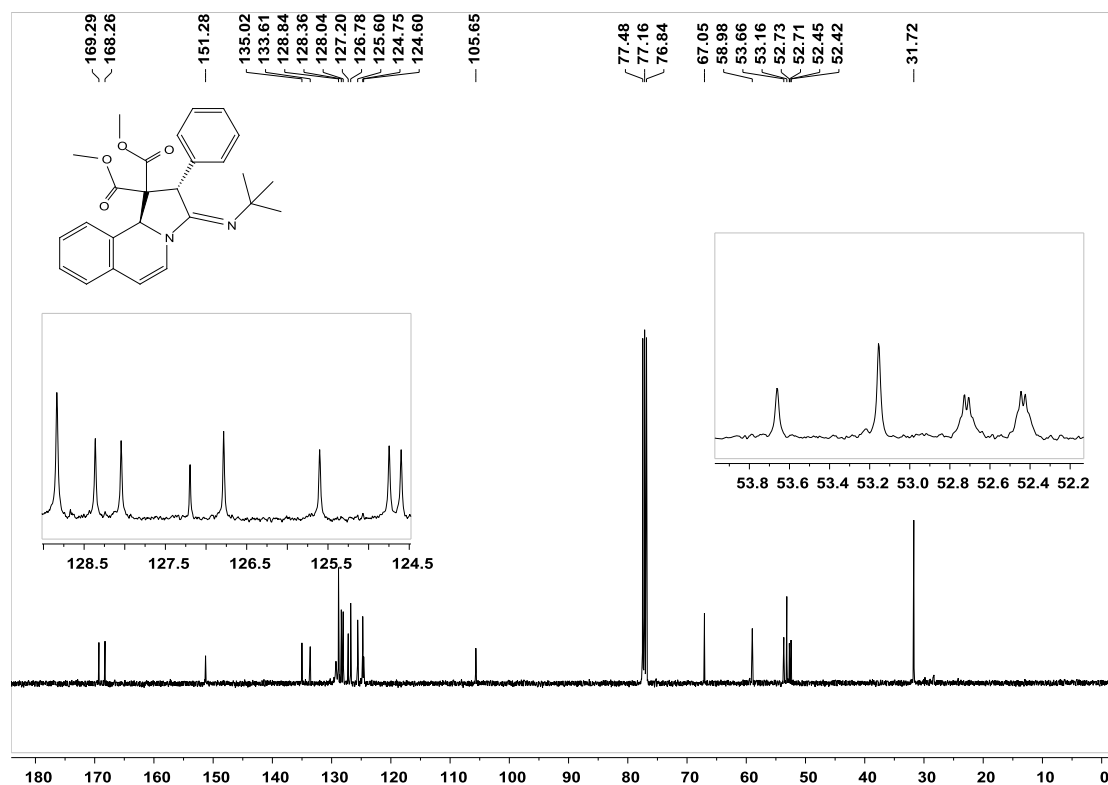

Supplementary Figure 130.  $^{13}\text{C}$  NMR spectra for product **8a**

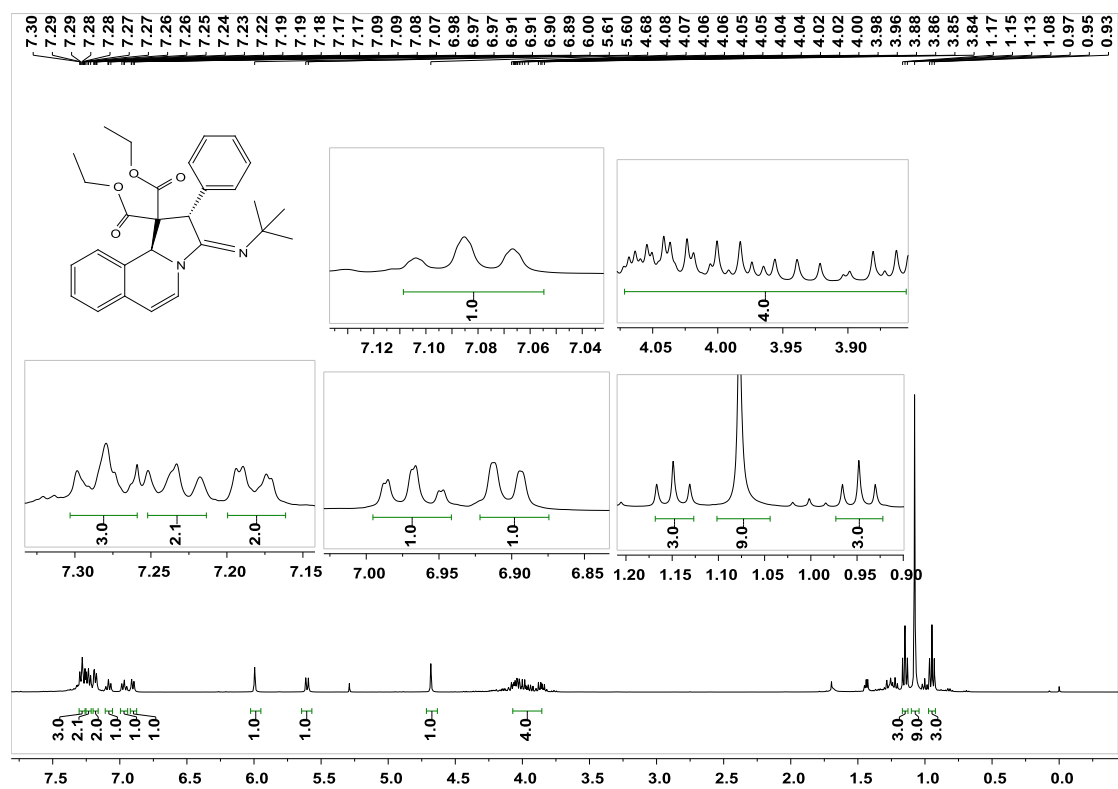

**Supplementary Figure 131.  $^1\text{H}$  NMR spectra for product **8b****

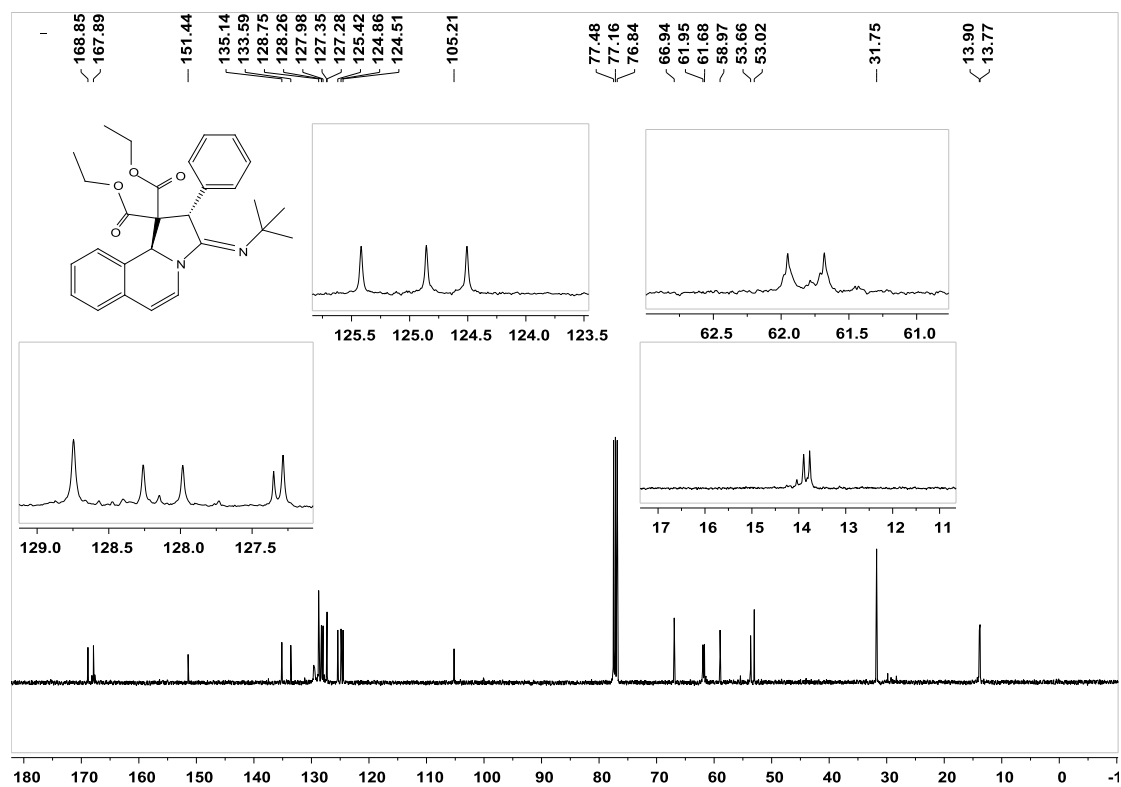

**Supplementary Figure 132.  $^{13}\text{C}$  NMR spectra for product **8b****

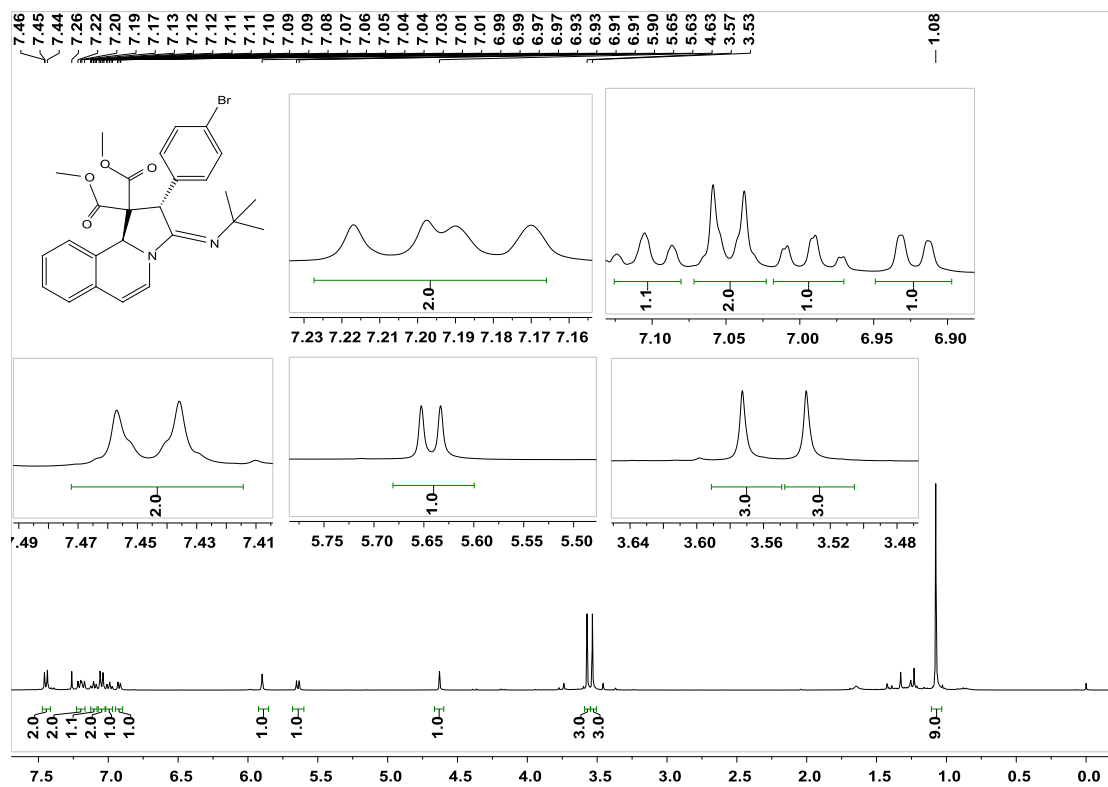

Supplementary Figure 133. <sup>1</sup>H NMR spectra for product 8c

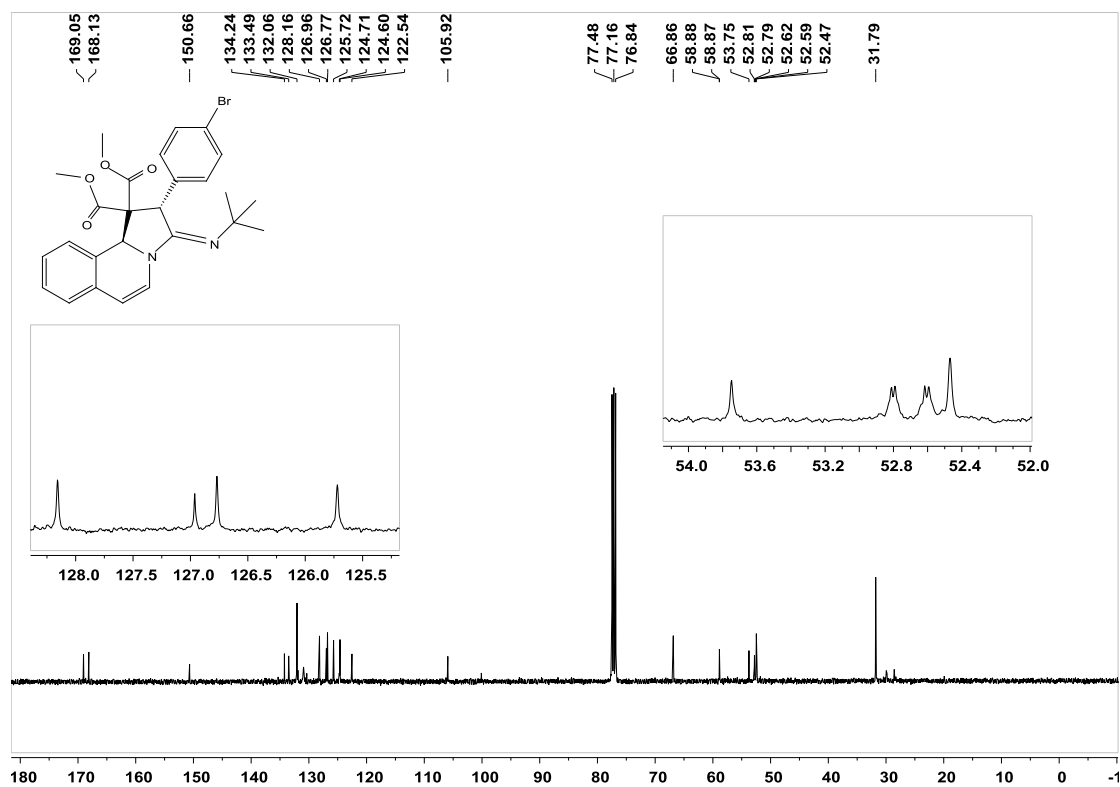

Supplementary Figure 134. <sup>13</sup>C NMR spectra for product 8c

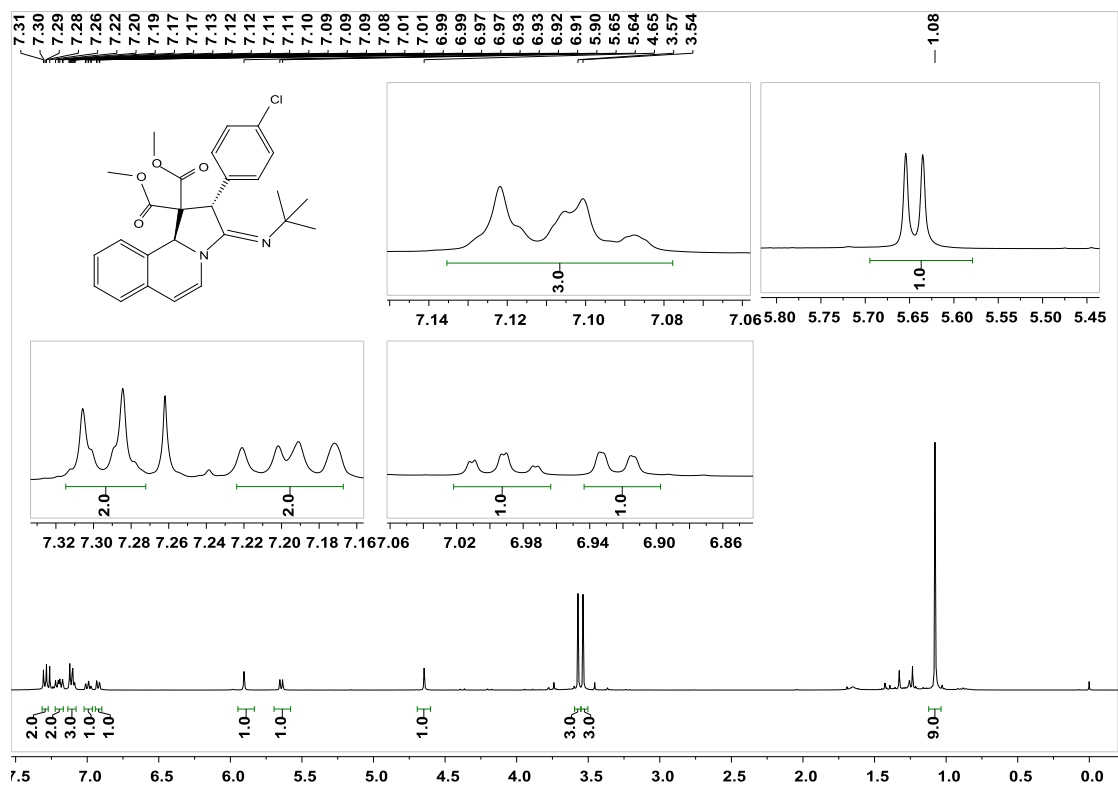

Supplementary Figure 135.  $^1\text{H}$  NMR spectra for product **8d**

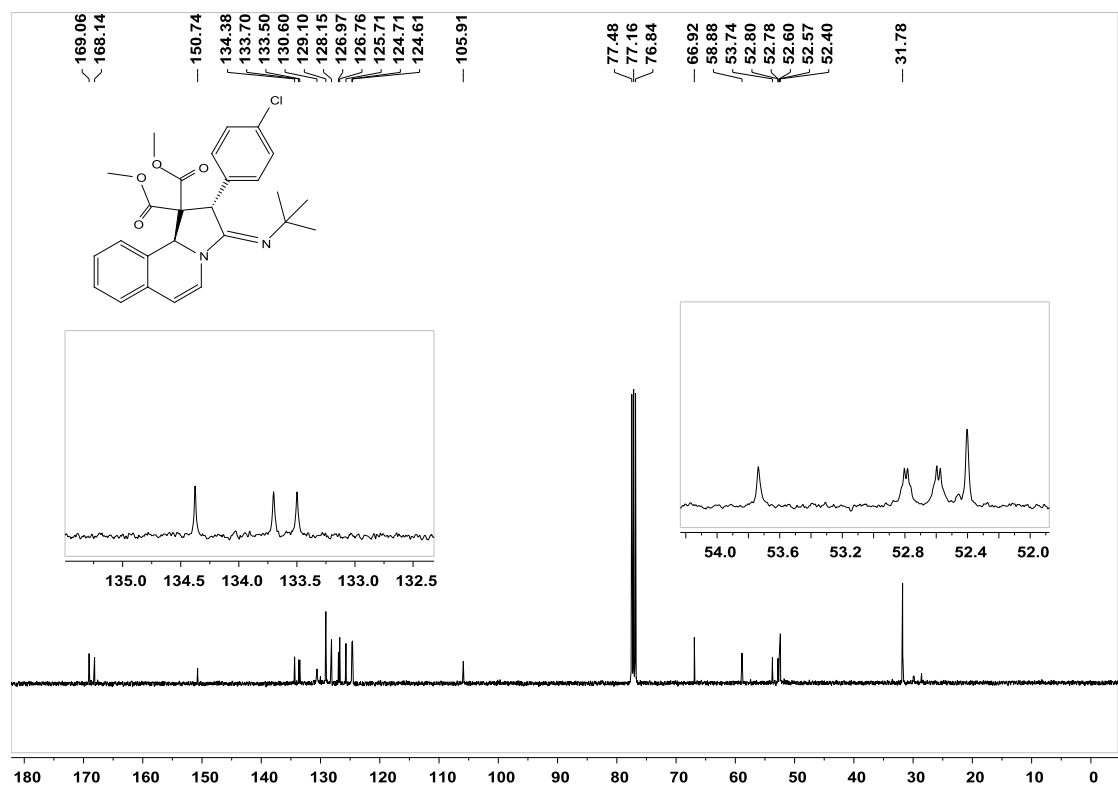

Supplementary Figure 136.  $^{13}\text{C}$  NMR spectra for product **8d**

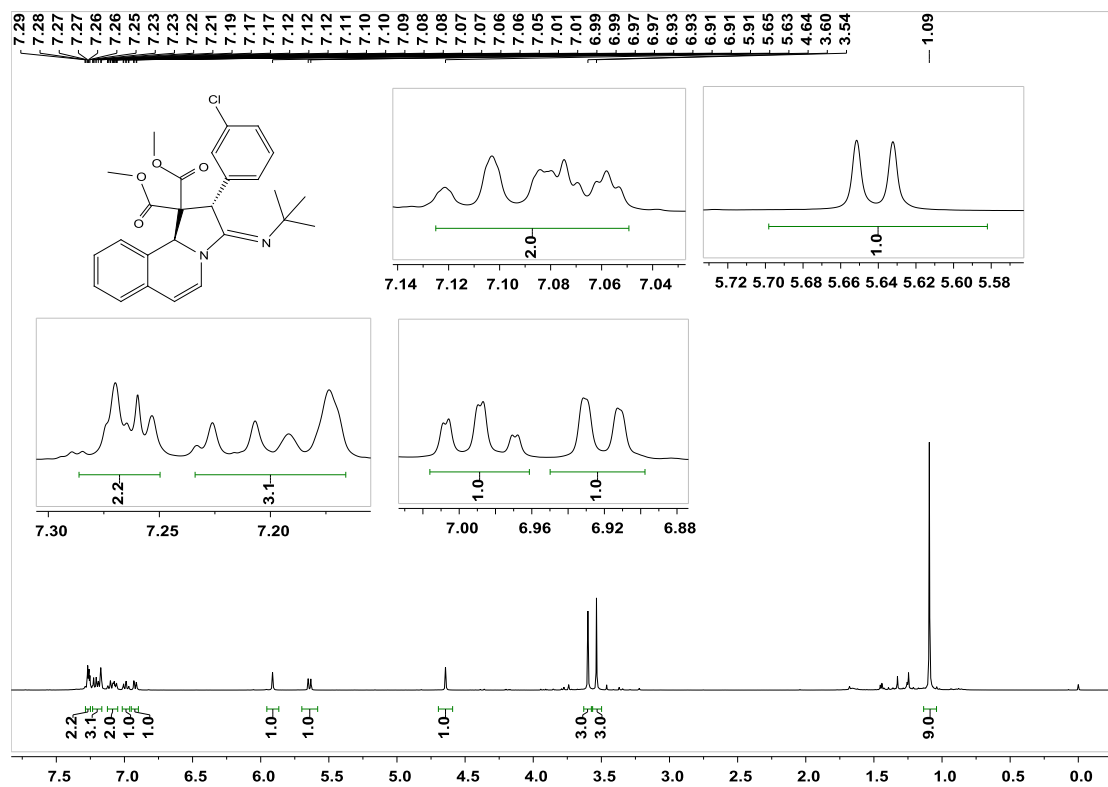

Supplementary Figure 137.  $^1\text{H}$  NMR spectra for product **8e**

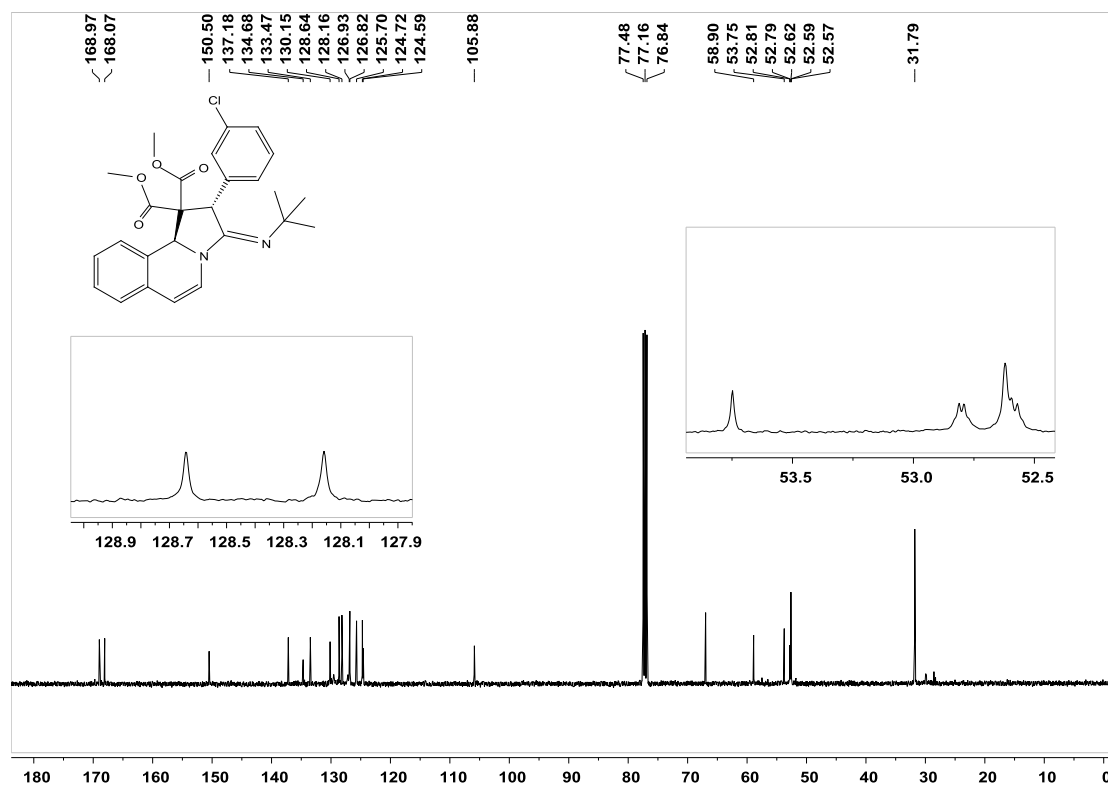

Supplementary Figure 138.  $^{13}\text{C}$  NMR spectra for product **8e**



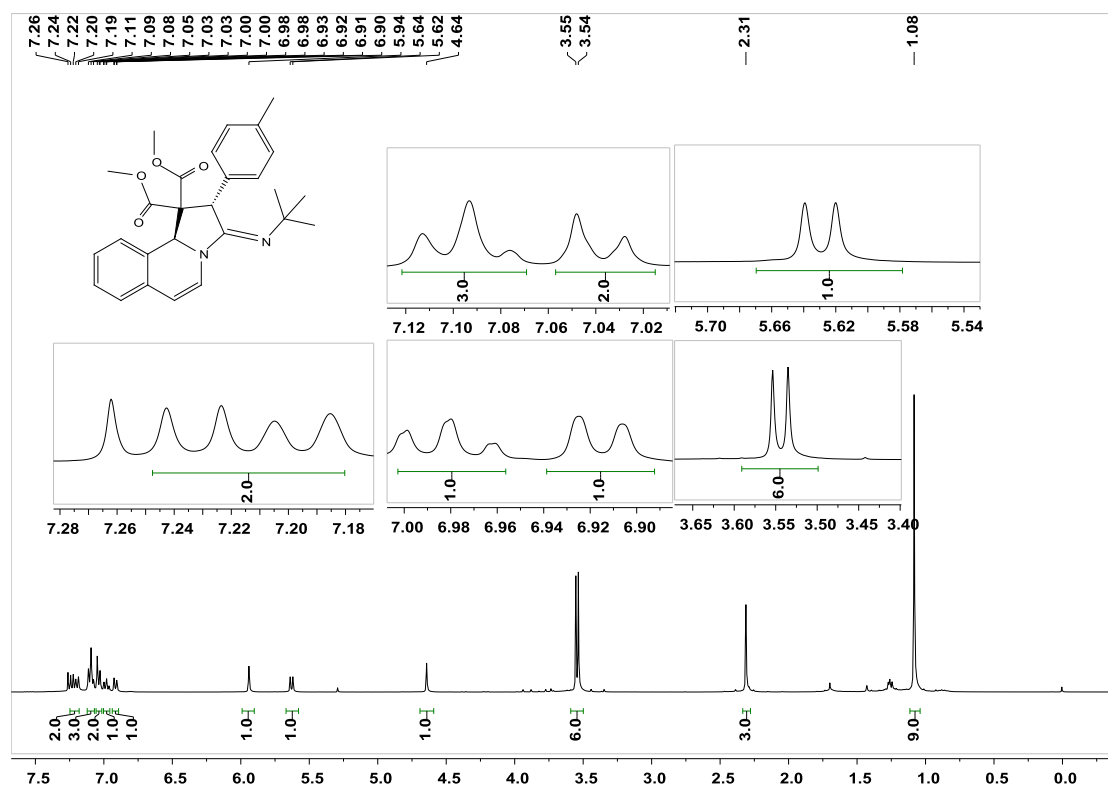

Supplementary Figure 139. <sup>1</sup>H NMR spectra for product 8f

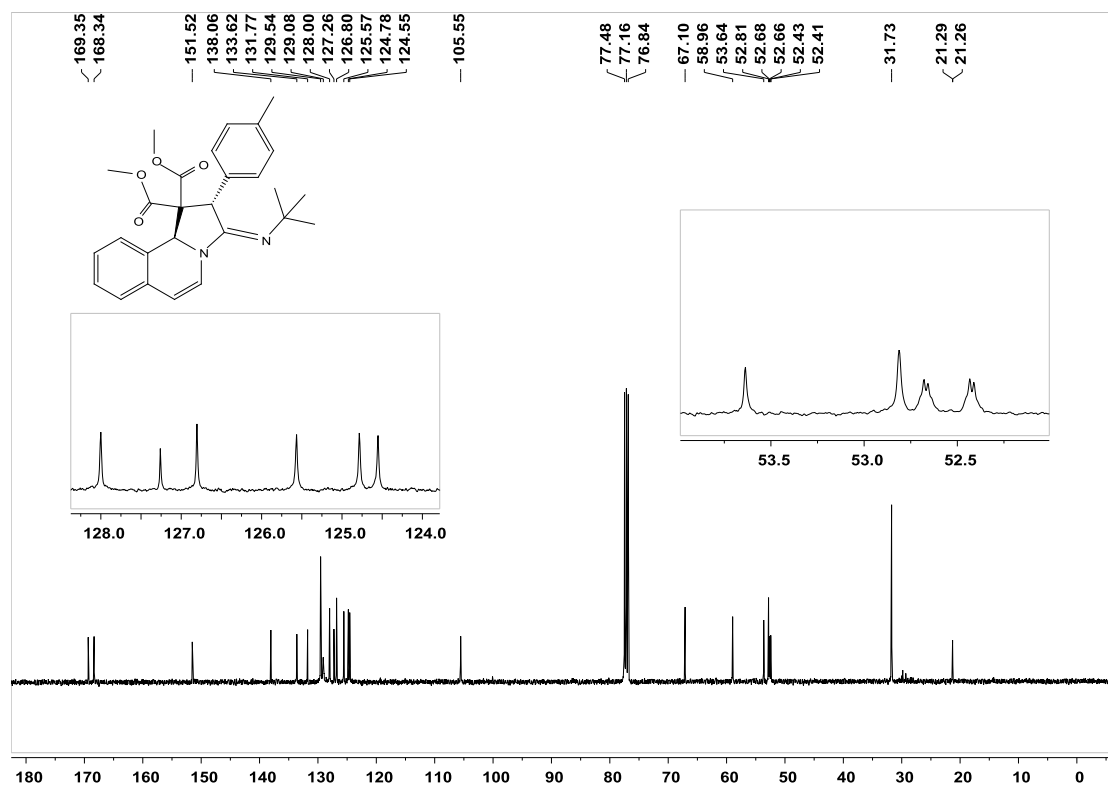

Supplementary Figure 140. <sup>13</sup>C NMR spectra for product 8f

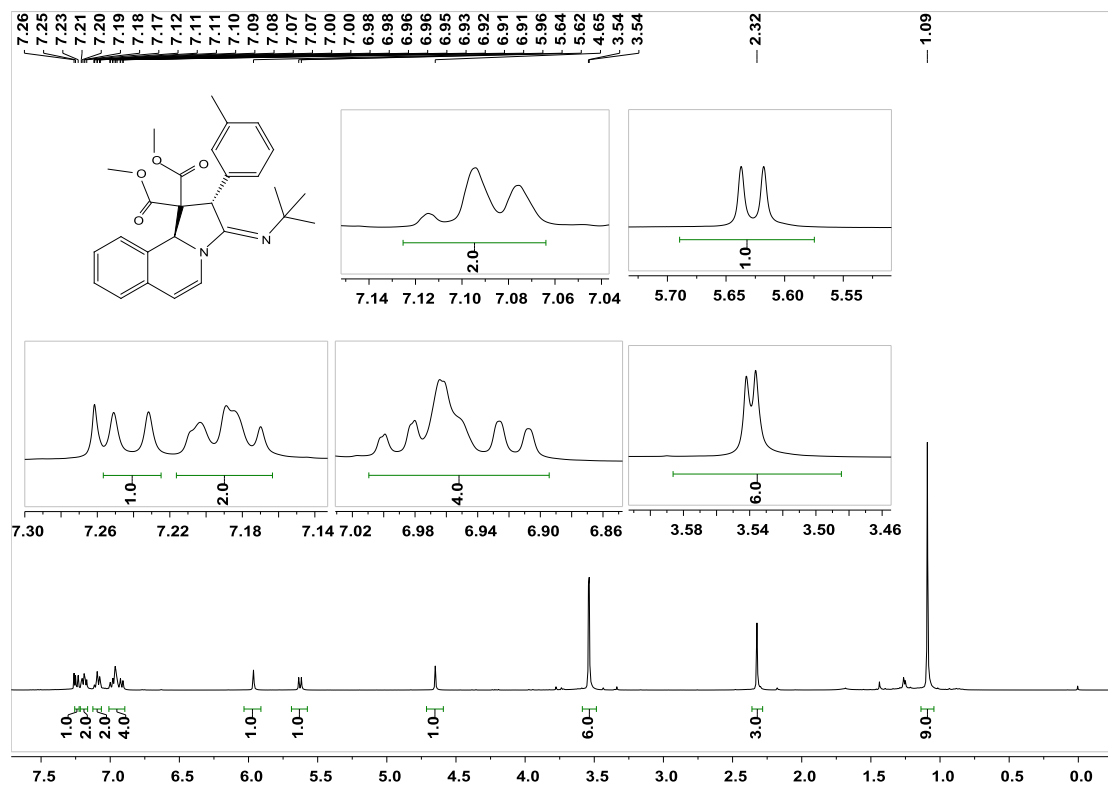

**Supplementary Figure 141.  $^1\text{H}$  NMR spectra for product **8g****

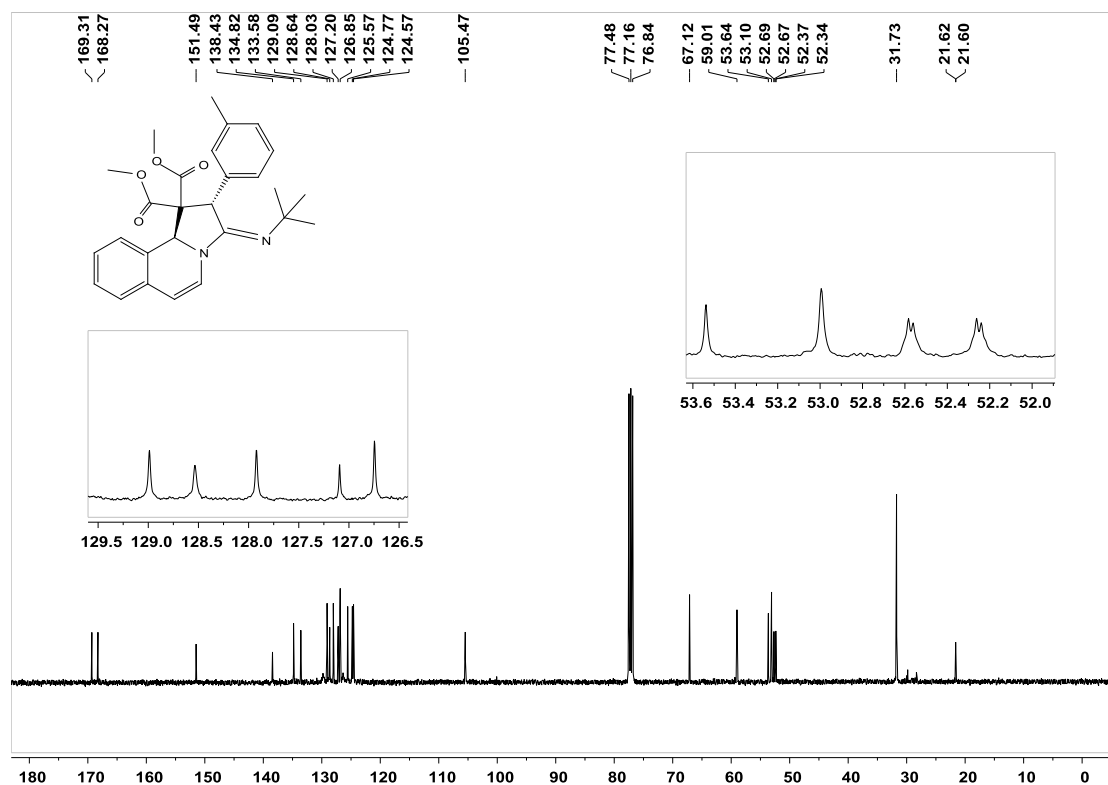

**Supplementary Figure 142.  $^{13}\text{C}$  NMR spectra for product **8g****

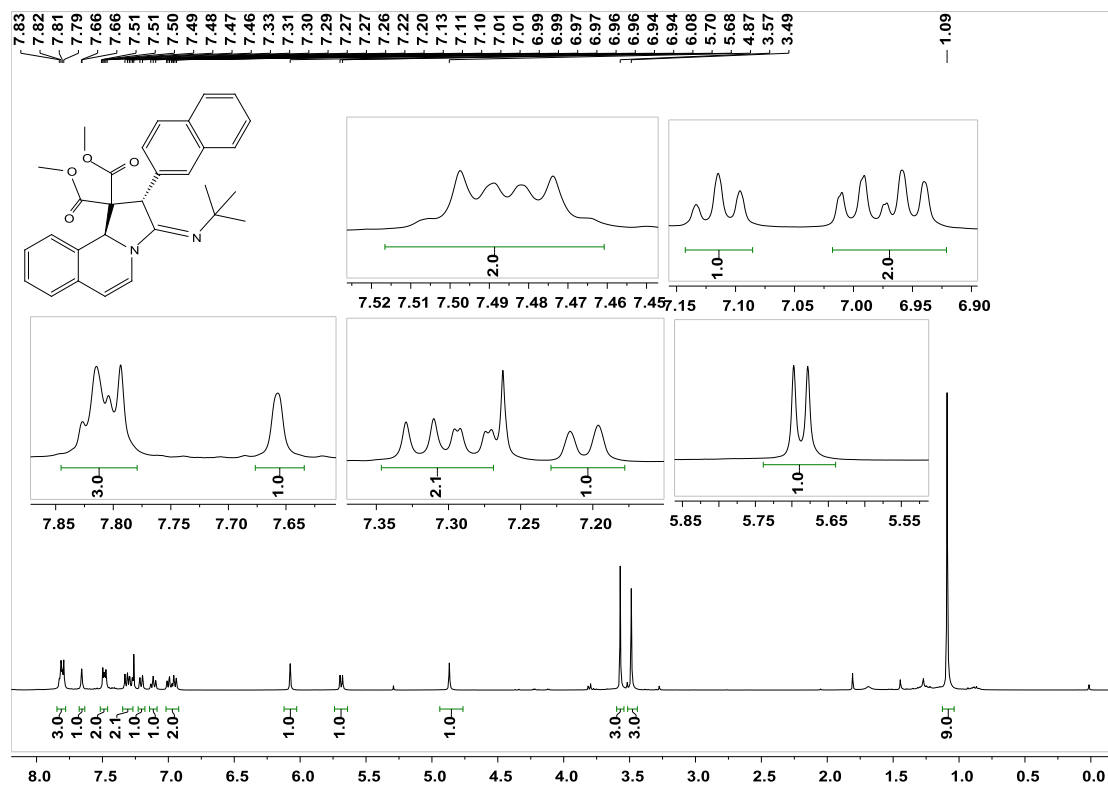

Supplementary Figure 143.  $^1\text{H}$  NMR spectra for product **8h**

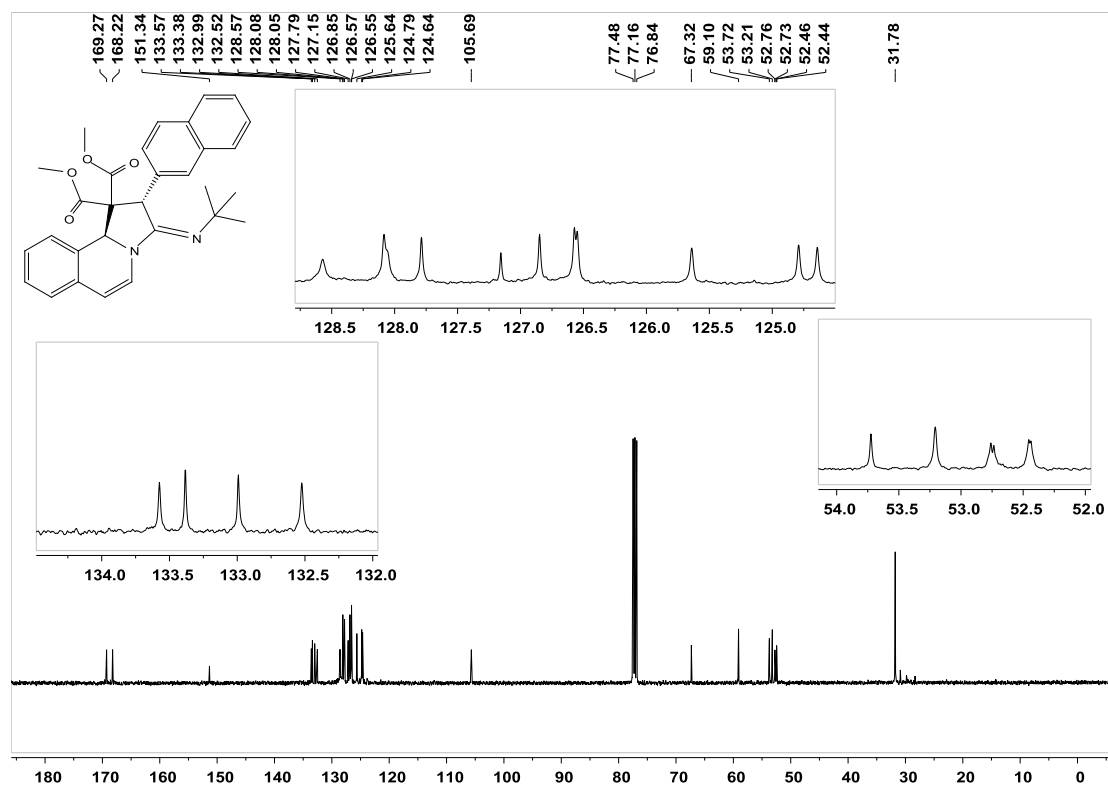

Supplementary Figure 144.  $^{13}\text{C}$  NMR spectra for product **8h**

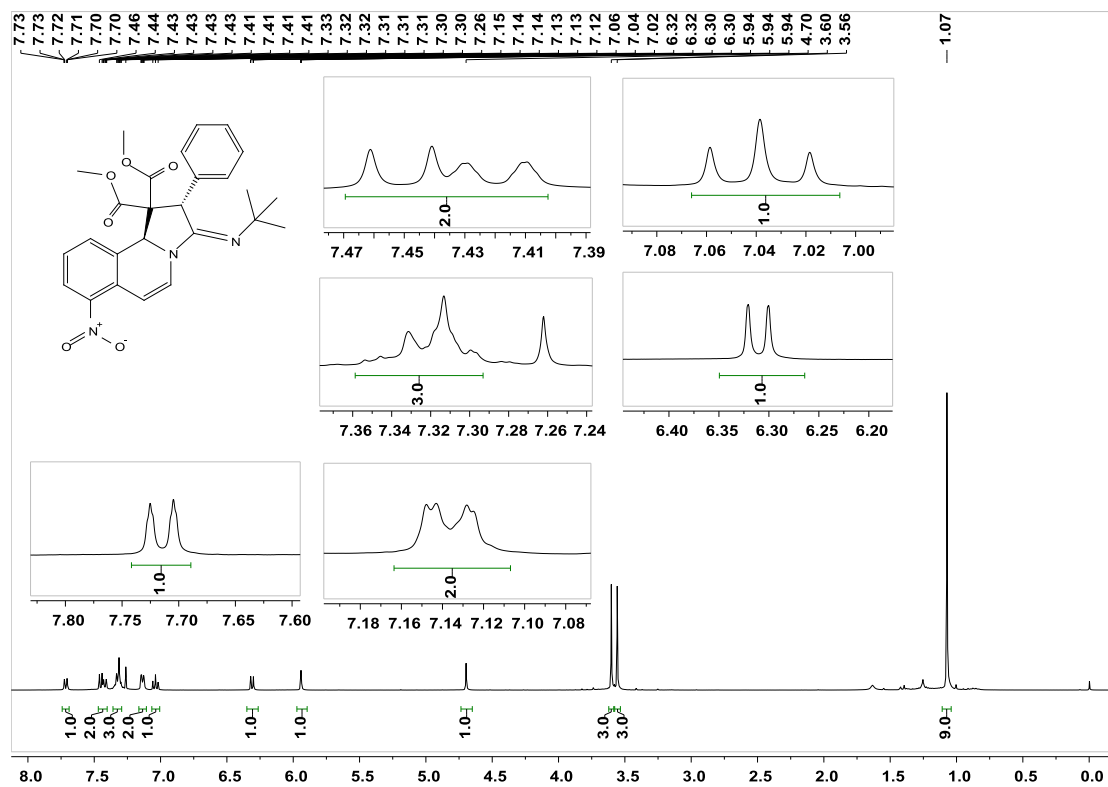

**Supplementary Figure 145. <sup>1</sup>H NMR spectra for product **8i****

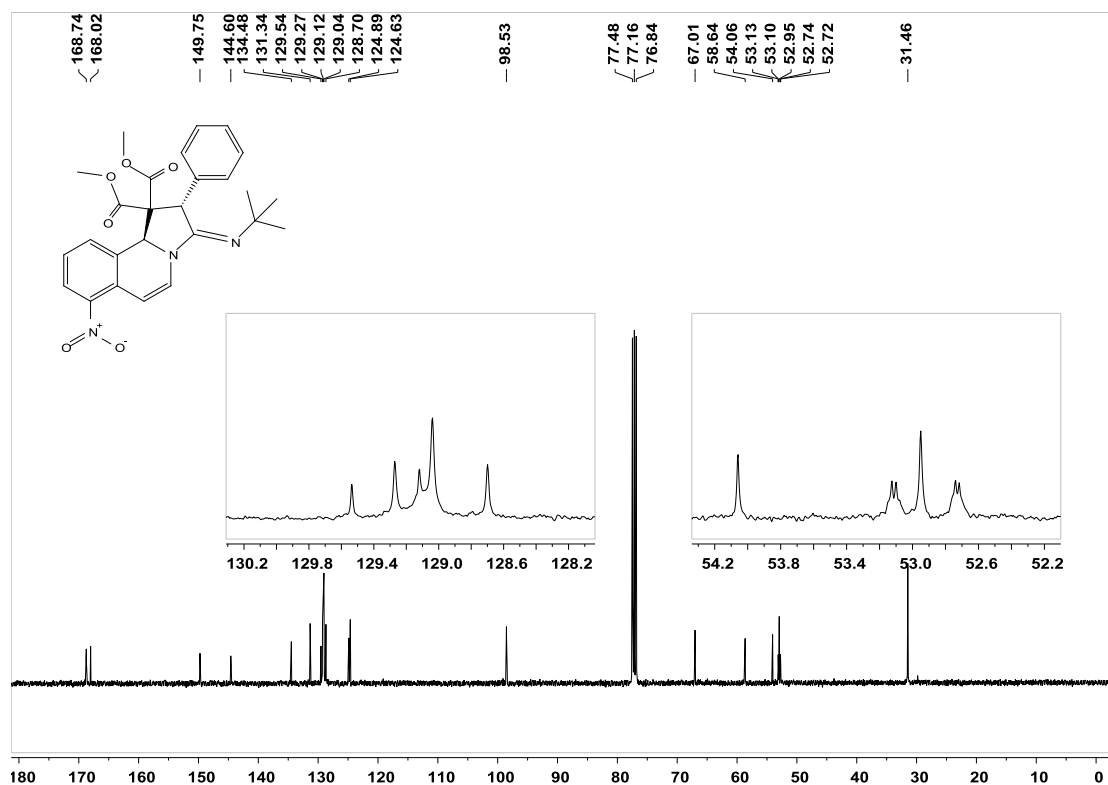

**Supplementary Figure 146. <sup>13</sup>C NMR spectra for product **8i****

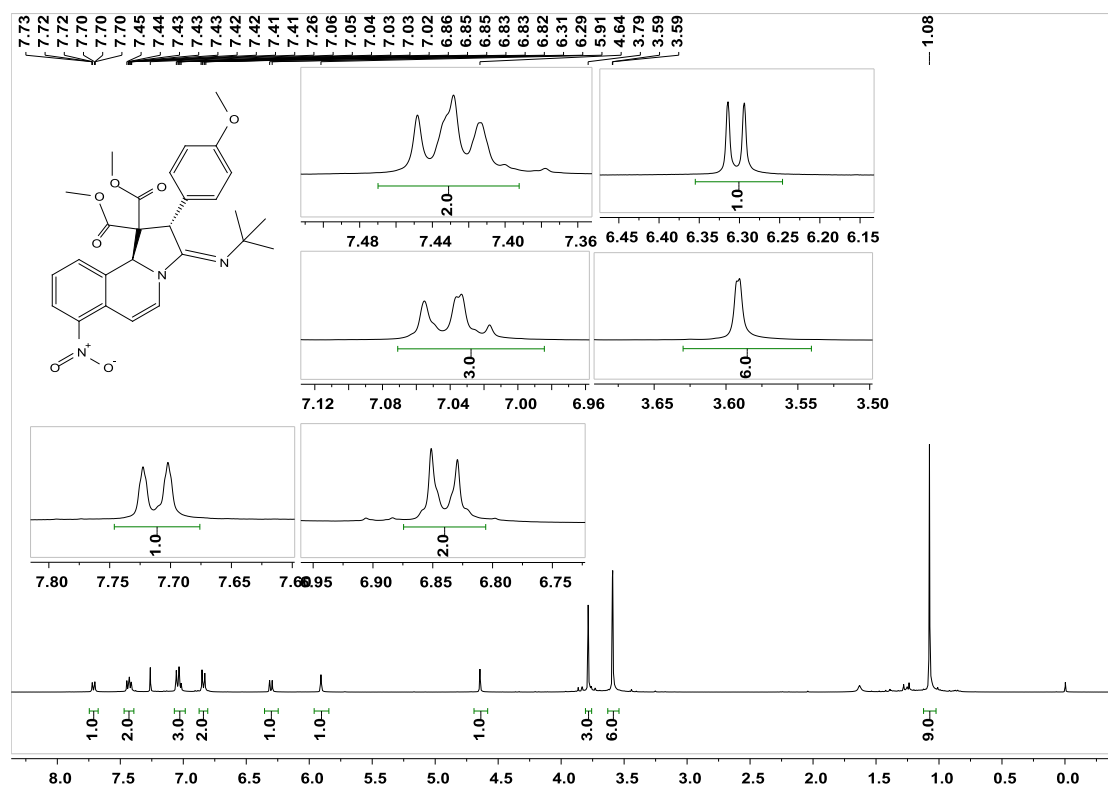

**Supplementary Figure 147. <sup>1</sup>H NMR spectra for product 8j**

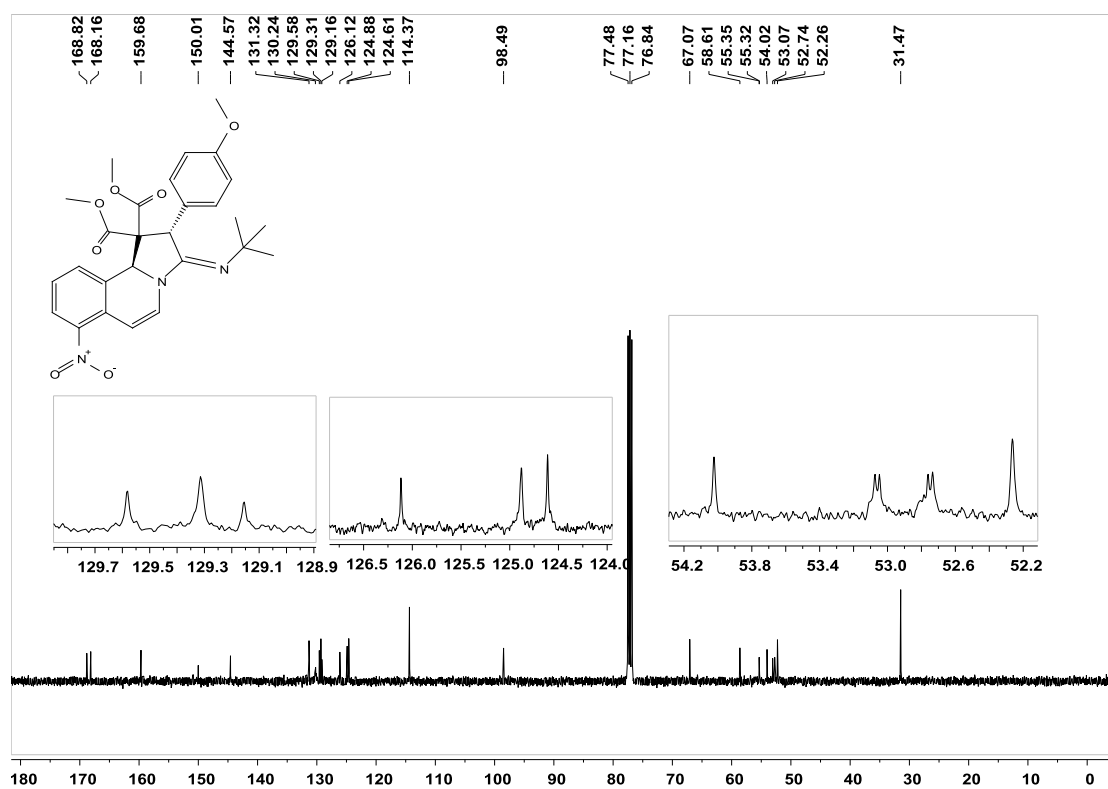

**Supplementary Figure 148. <sup>13</sup>C NMR spectra for product 8j**

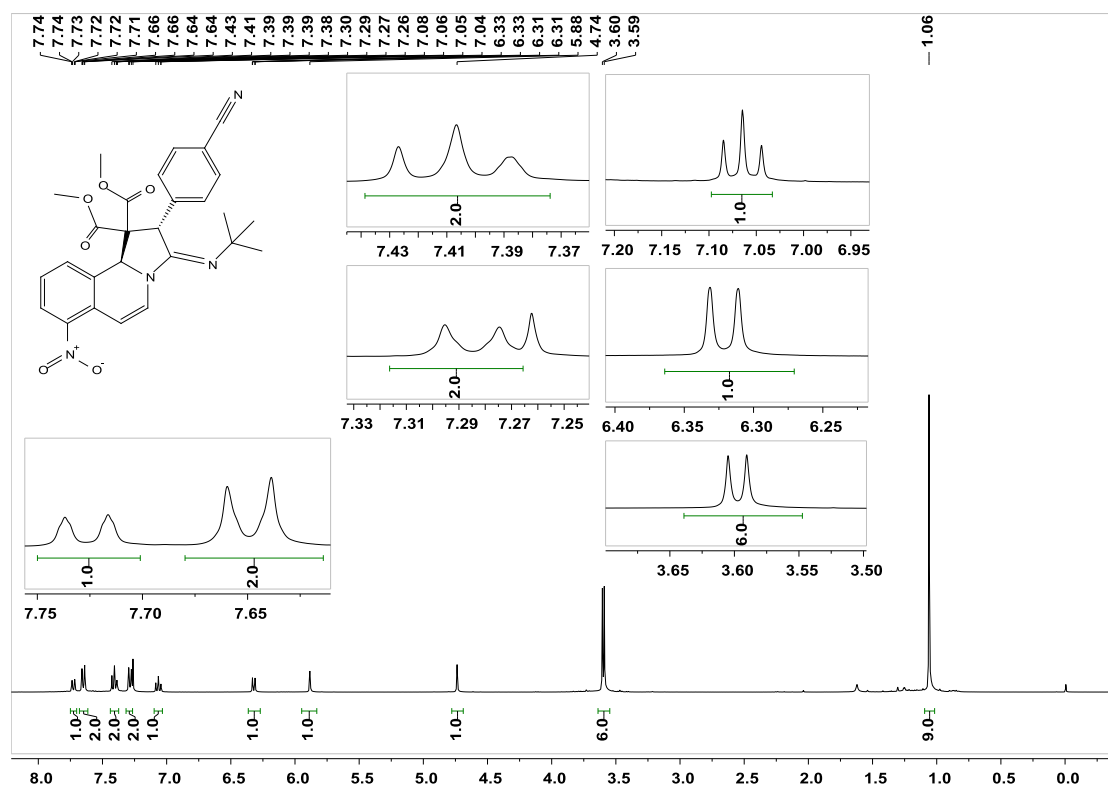

**Supplementary Figure 149. <sup>1</sup>H NMR spectra for product 8k**

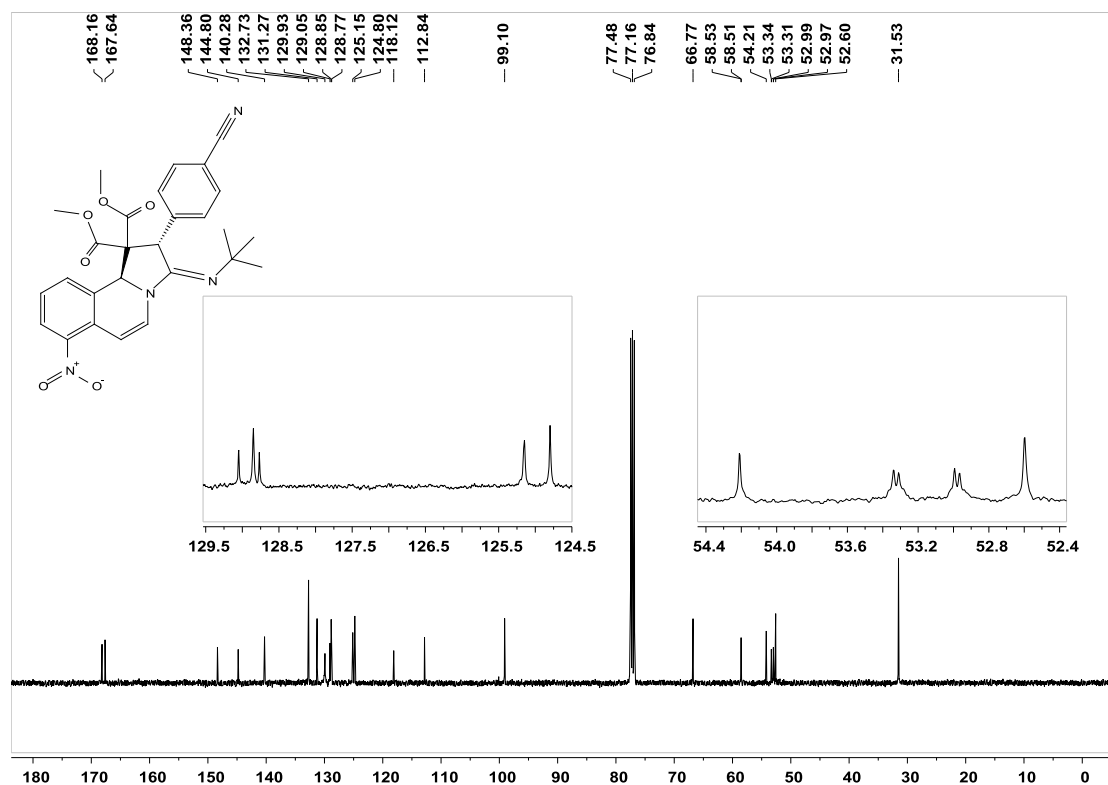

**Supplementary Figure 150. <sup>13</sup>C NMR spectra for product 8k**

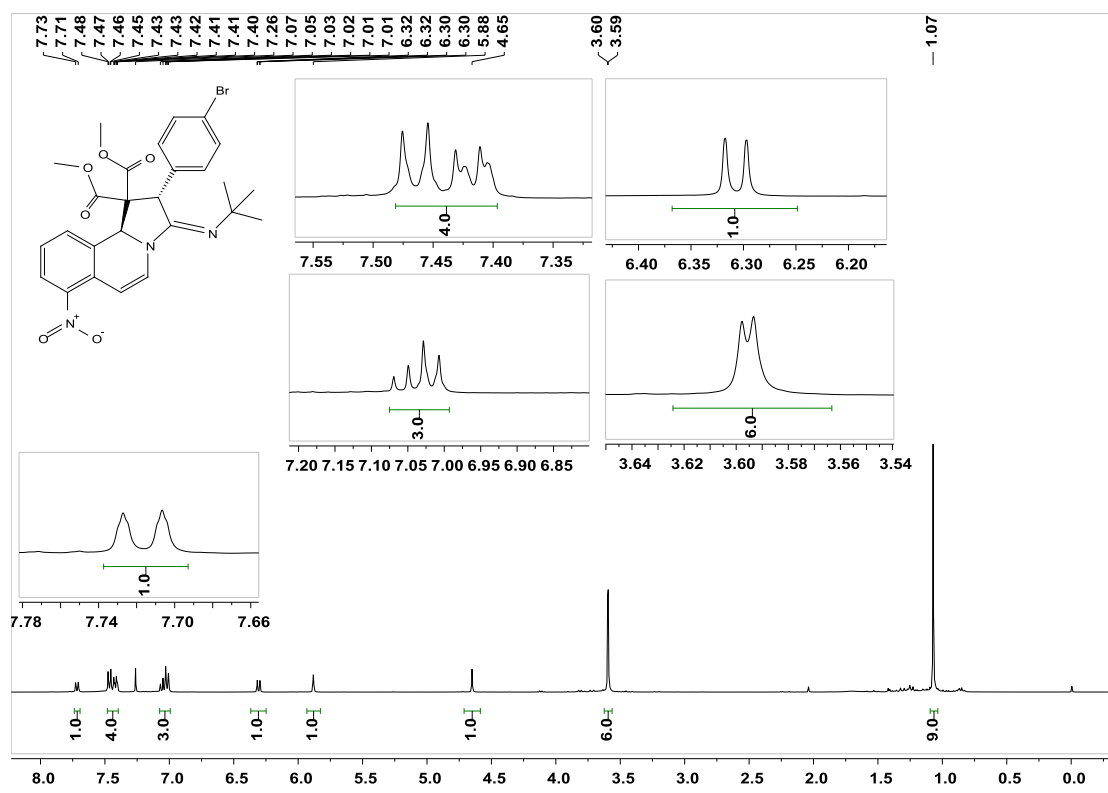

Supplementary Figure 151.  $^1\text{H}$  NMR spectra for product **8I**

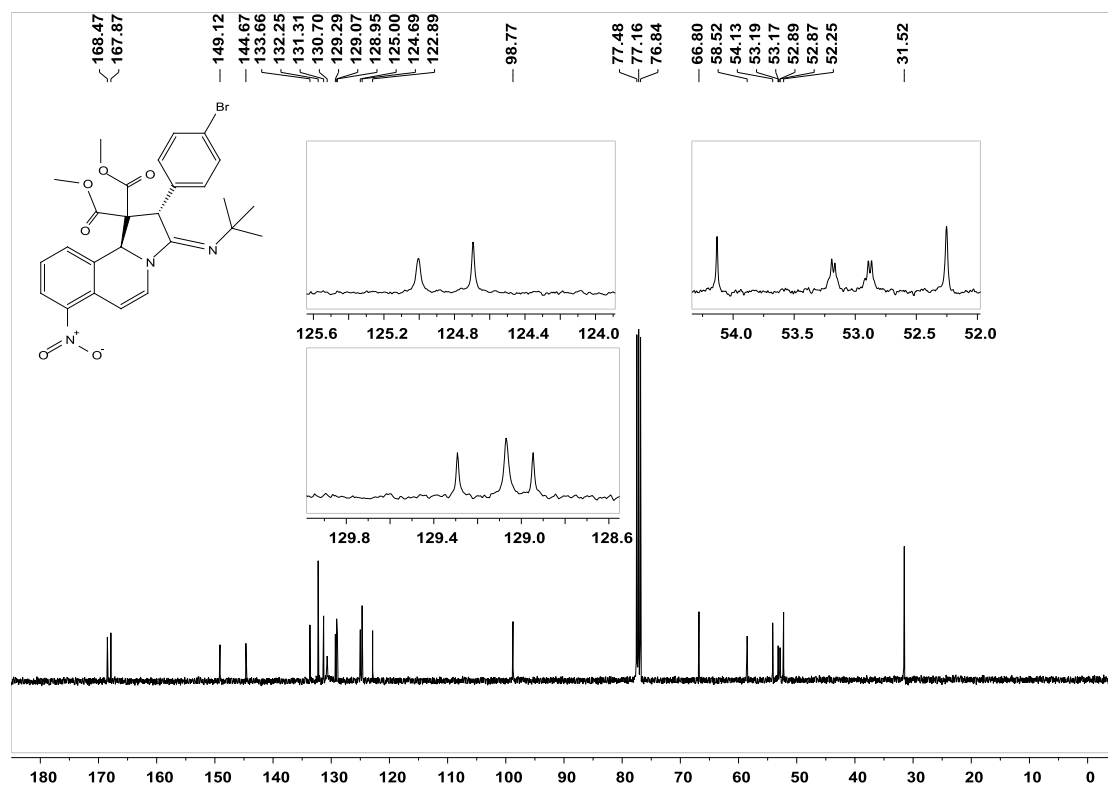

Supplementary Figure 152.  $^{13}\text{C}$  NMR spectra for product **8I**

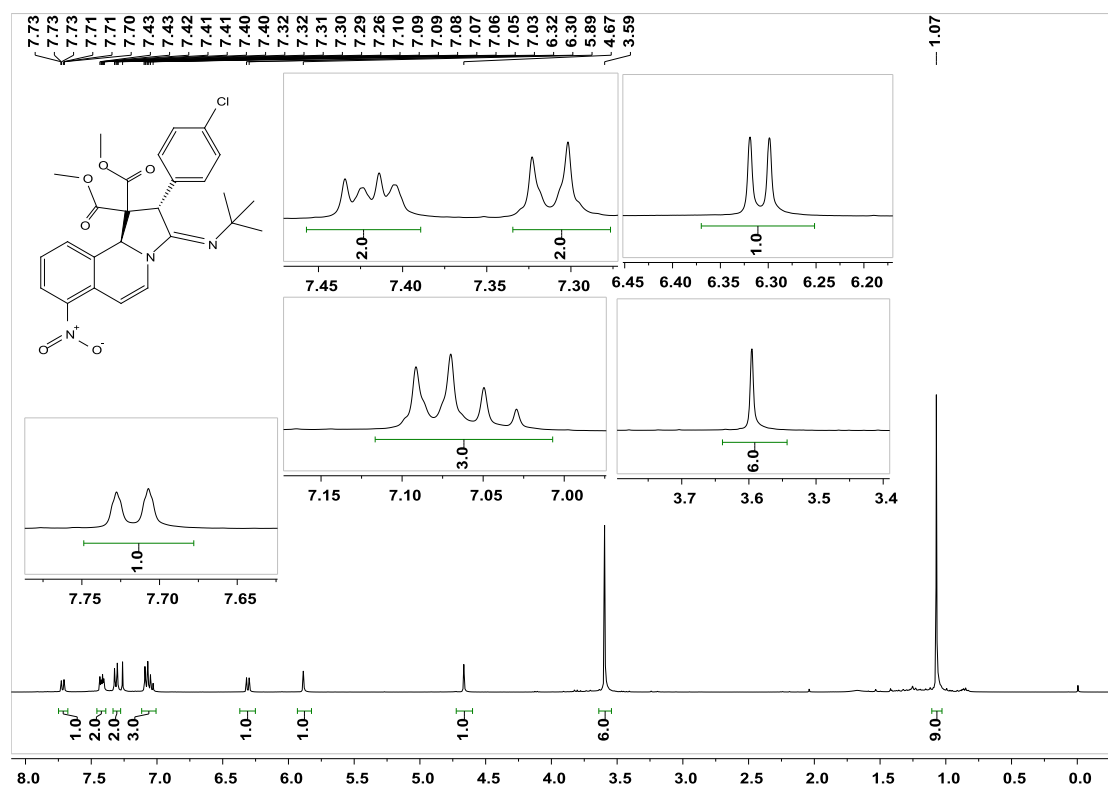

Supplementary Figure 153.  $^1\text{H}$  NMR spectra for product **8m**

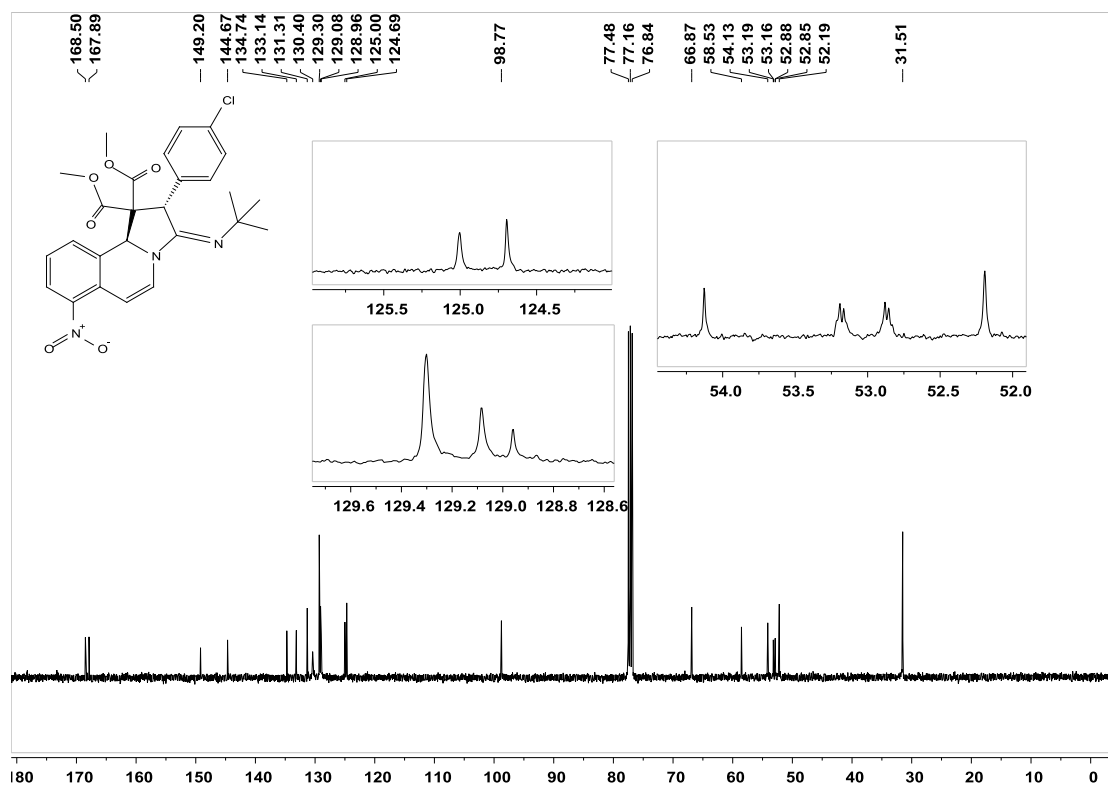

Supplementary Figure 154.  $^{13}\text{C}$  NMR spectra for product **8m**



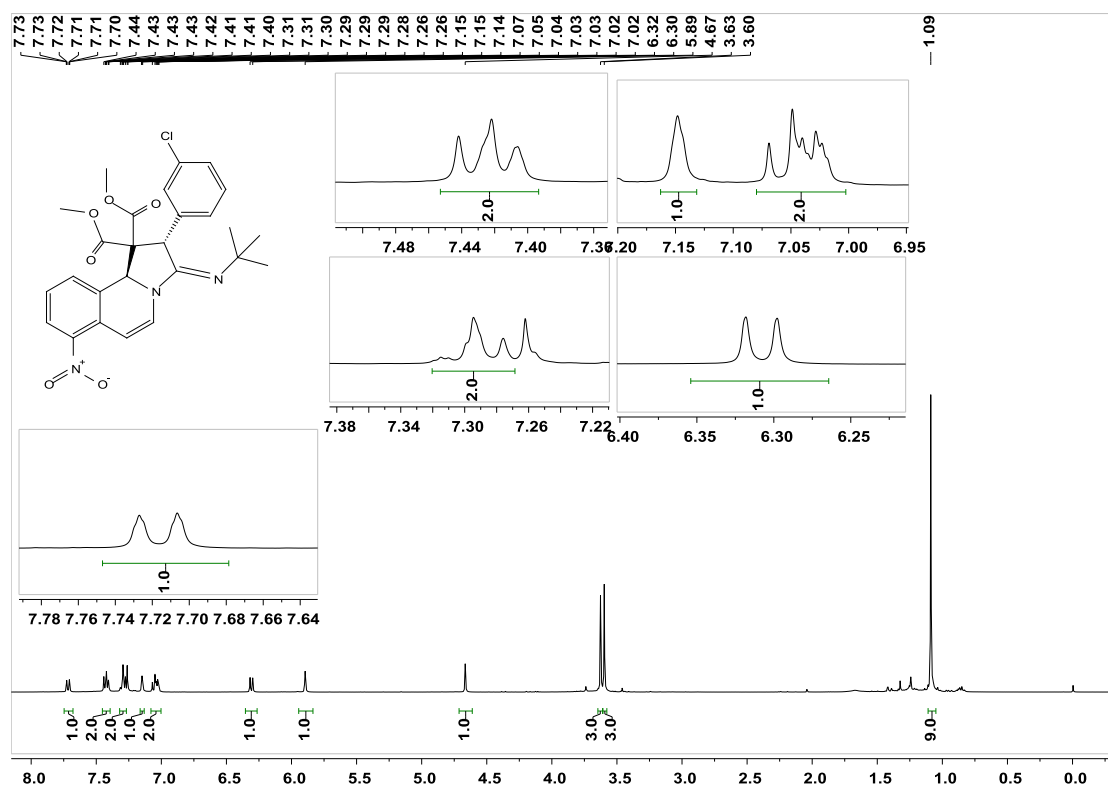

Supplementary Figure 155.  $^1\text{H}$  NMR spectra for product **8n**

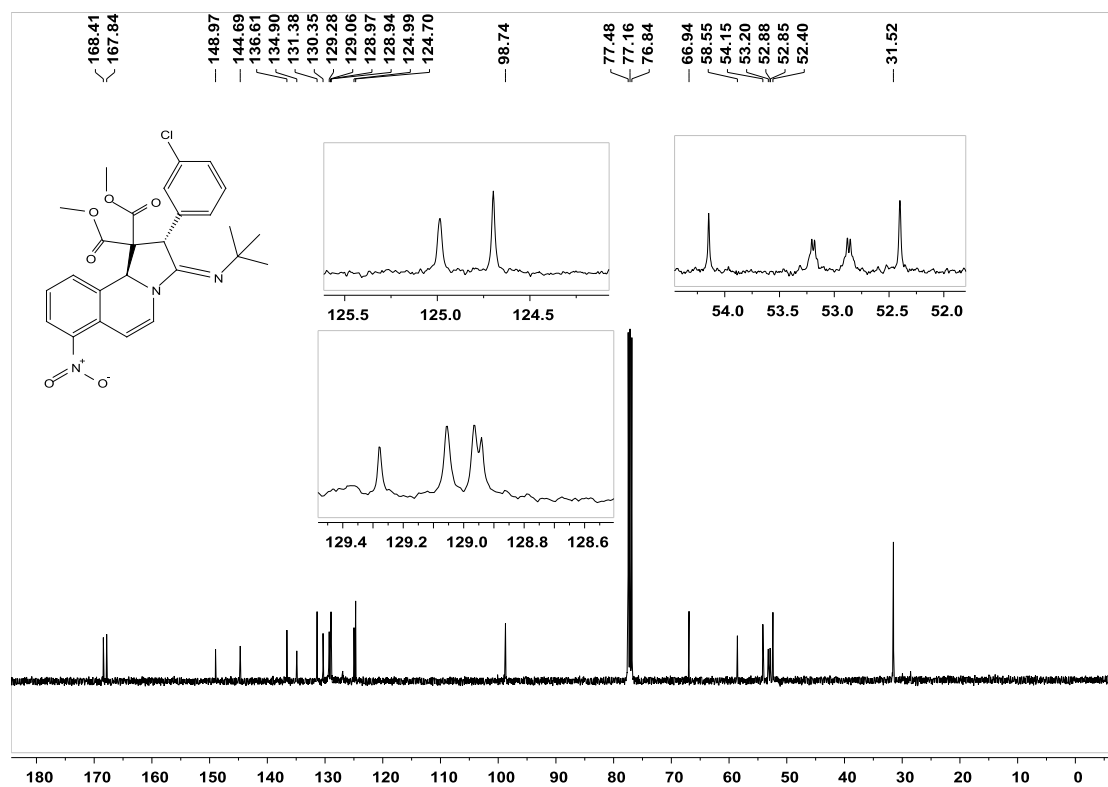

Supplementary Figure 156.  $^{13}\text{C}$  NMR spectra for product **8n**

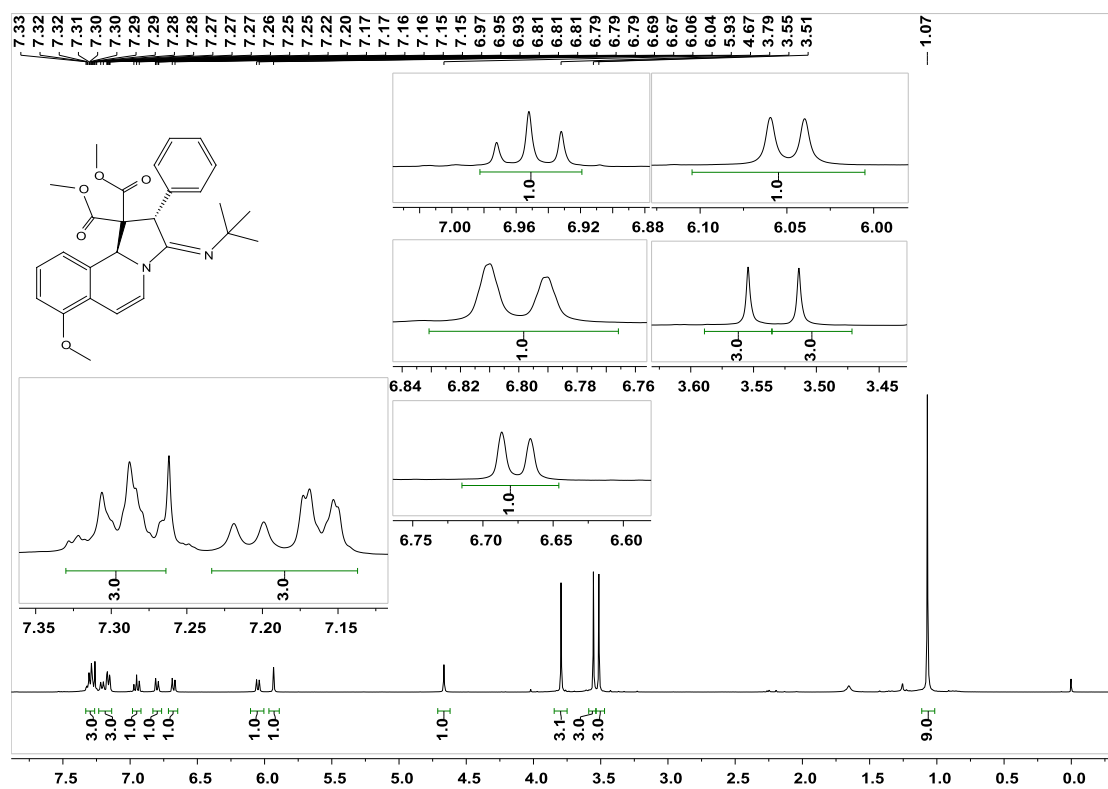

Supplementary Figure 157.  $^1\text{H}$  NMR spectra for product **80**

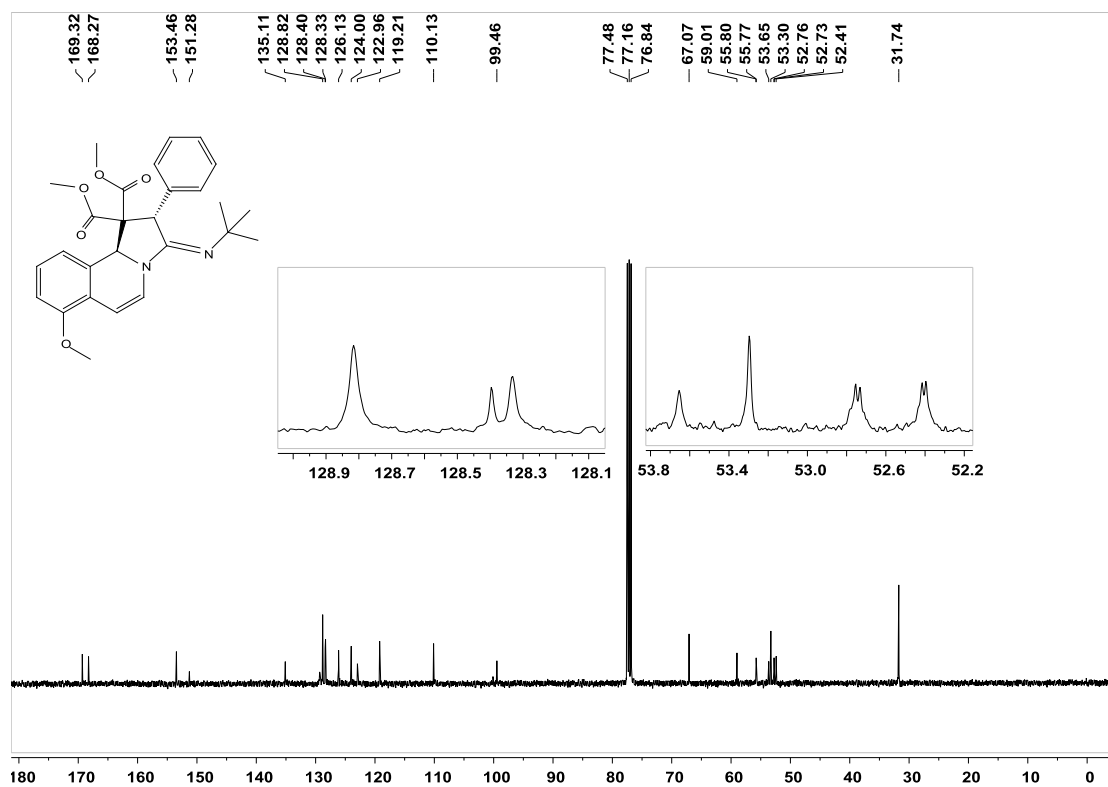

Supplementary Figure 158.  $^{13}\text{C}$  NMR spectra for product **80**

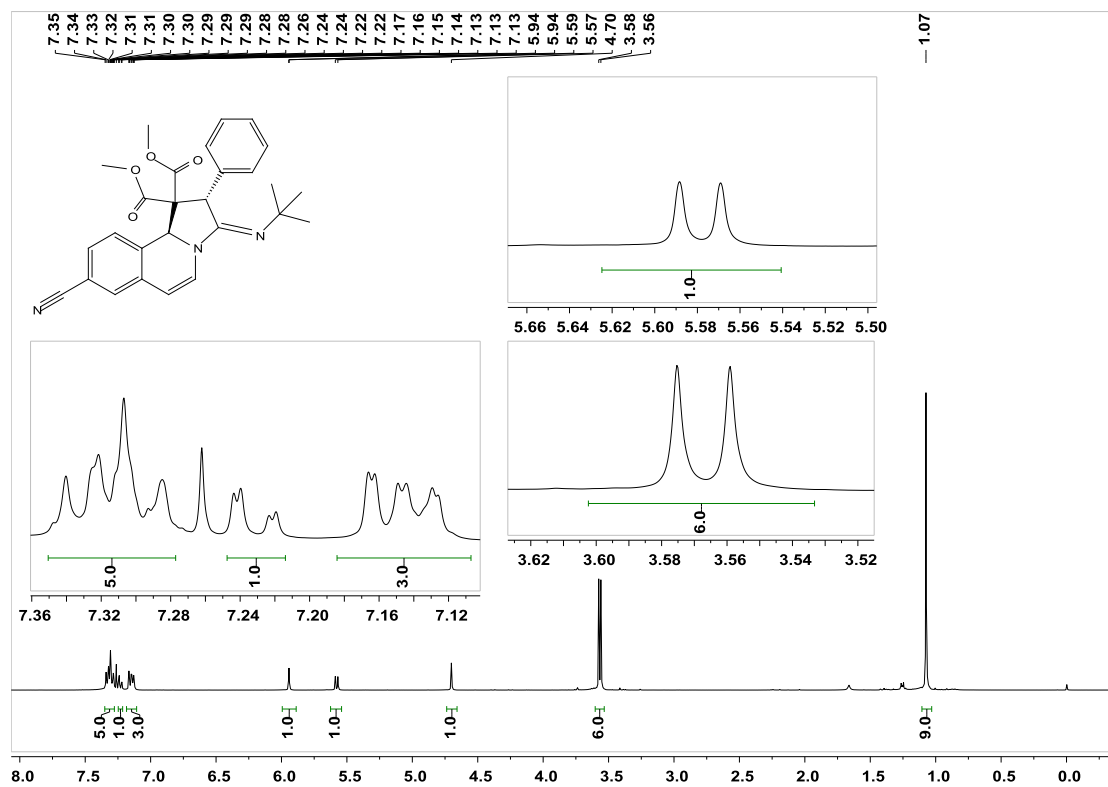

Supplementary Figure 159.  $^1\text{H}$  NMR spectra for product **8p**

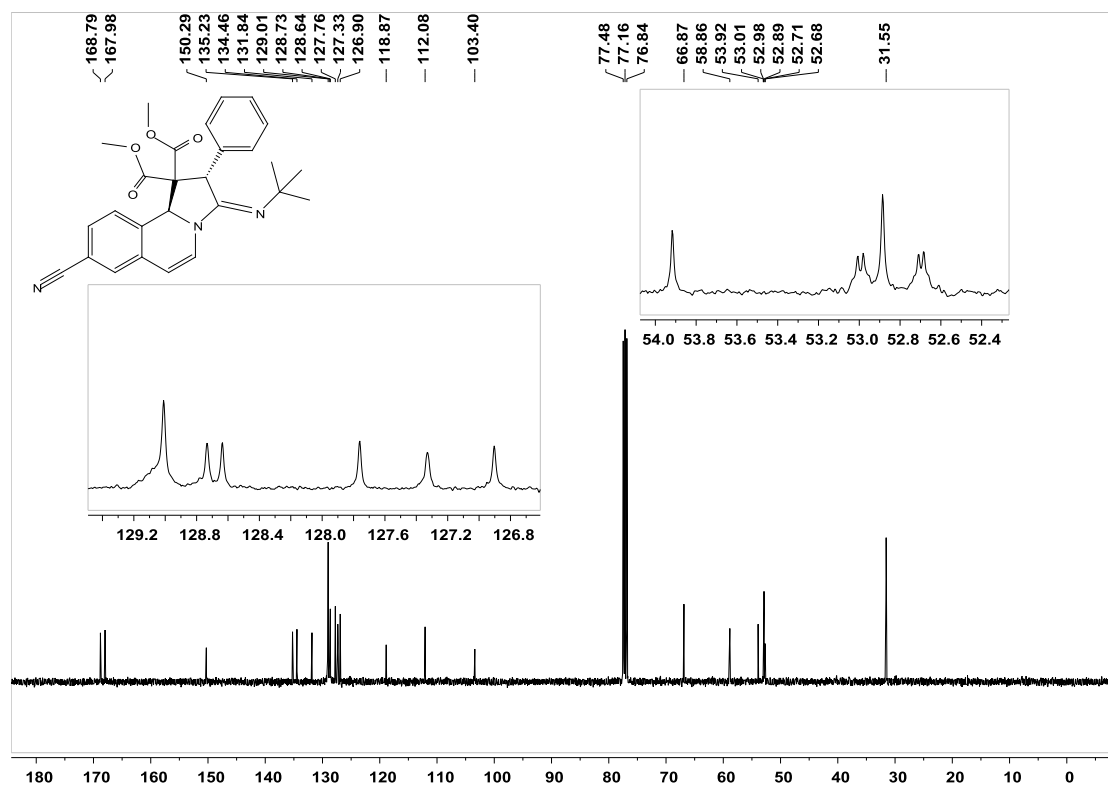

Supplementary Figure 160.  $^{13}\text{C}$  NMR spectra for product **8p**

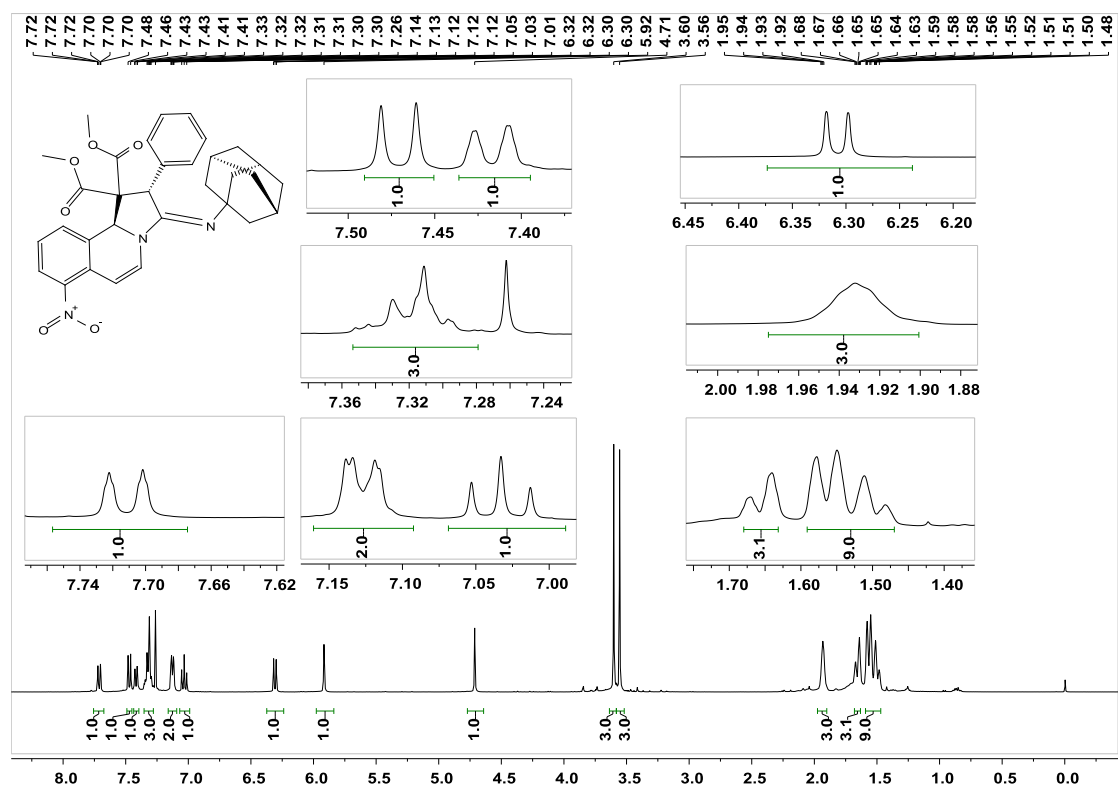

Supplementary Figure 161. <sup>1</sup>H NMR spectra for product **8q**

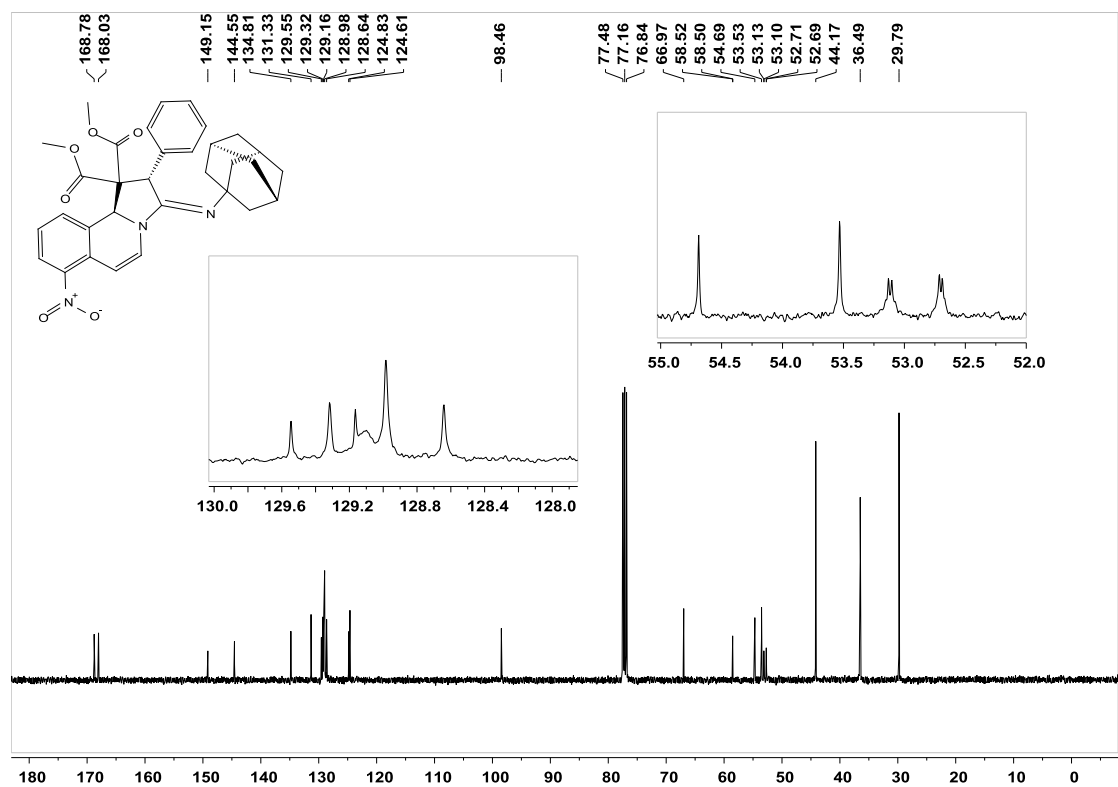

Supplementary Figure 162. <sup>13</sup>C NMR spectra for product **8q**

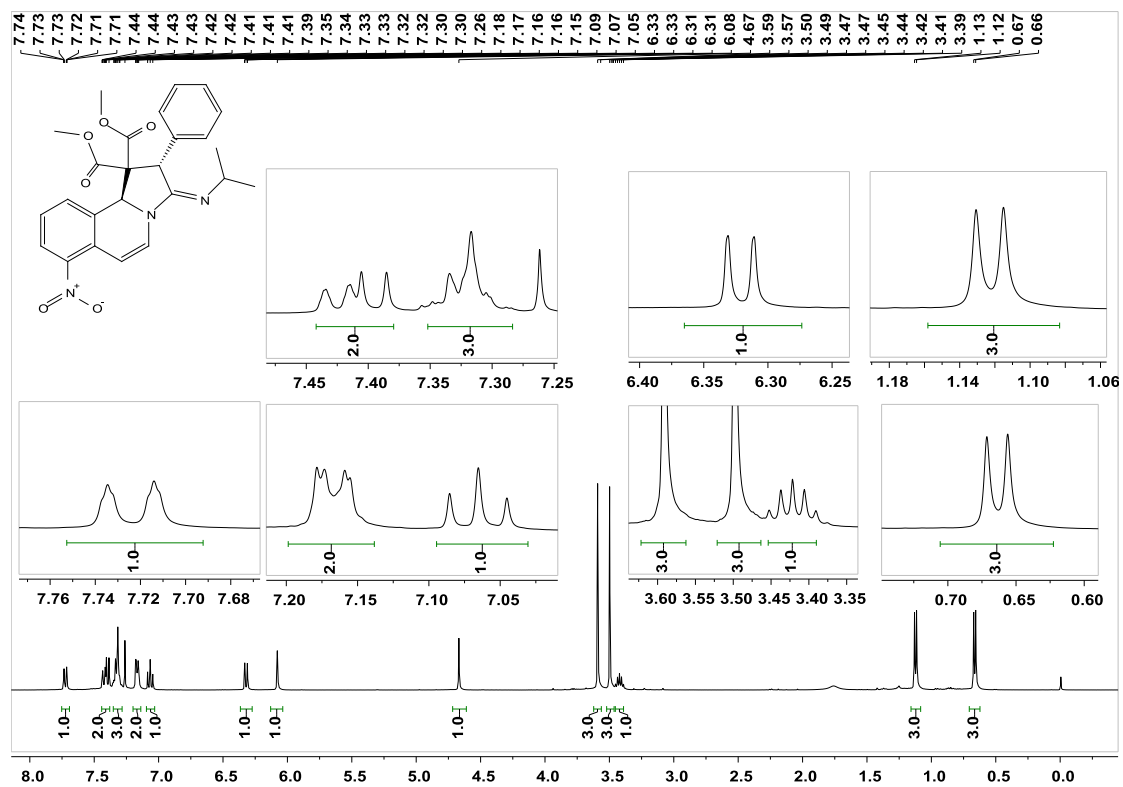

Supplementary Figure 163. <sup>1</sup>H NMR spectra for product **8r**

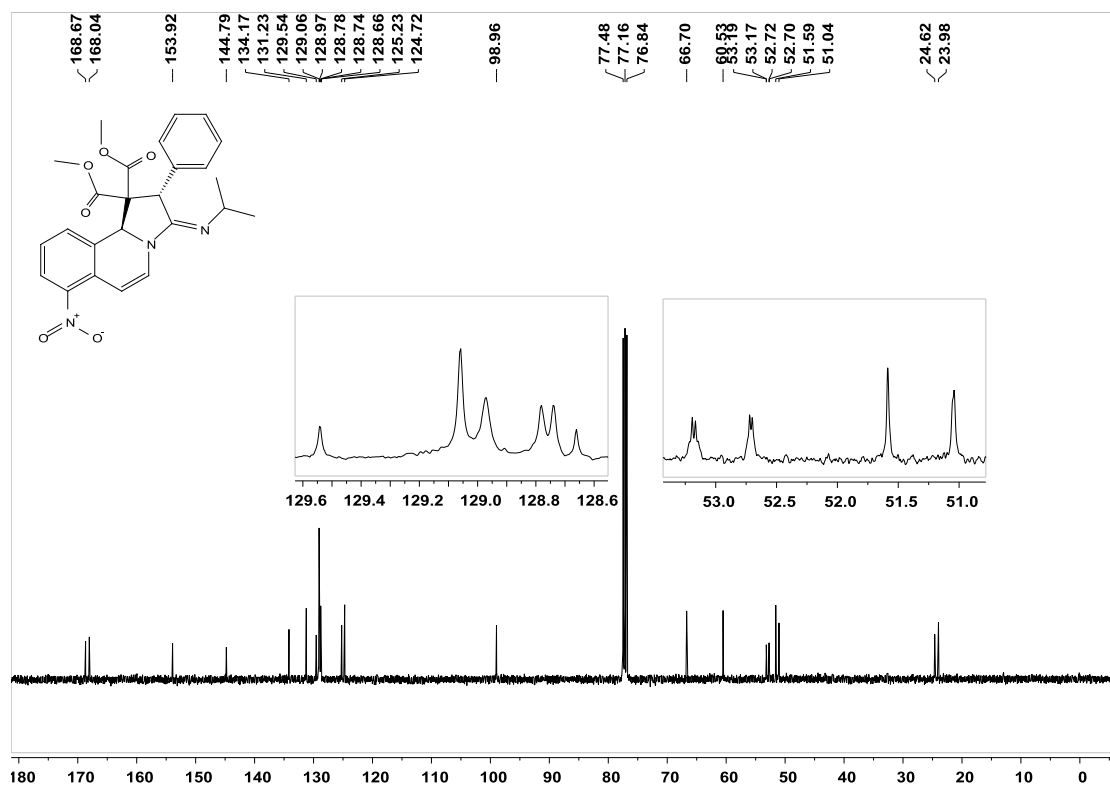

Supplementary Figure 164. <sup>13</sup>C NMR spectra for product **8r**

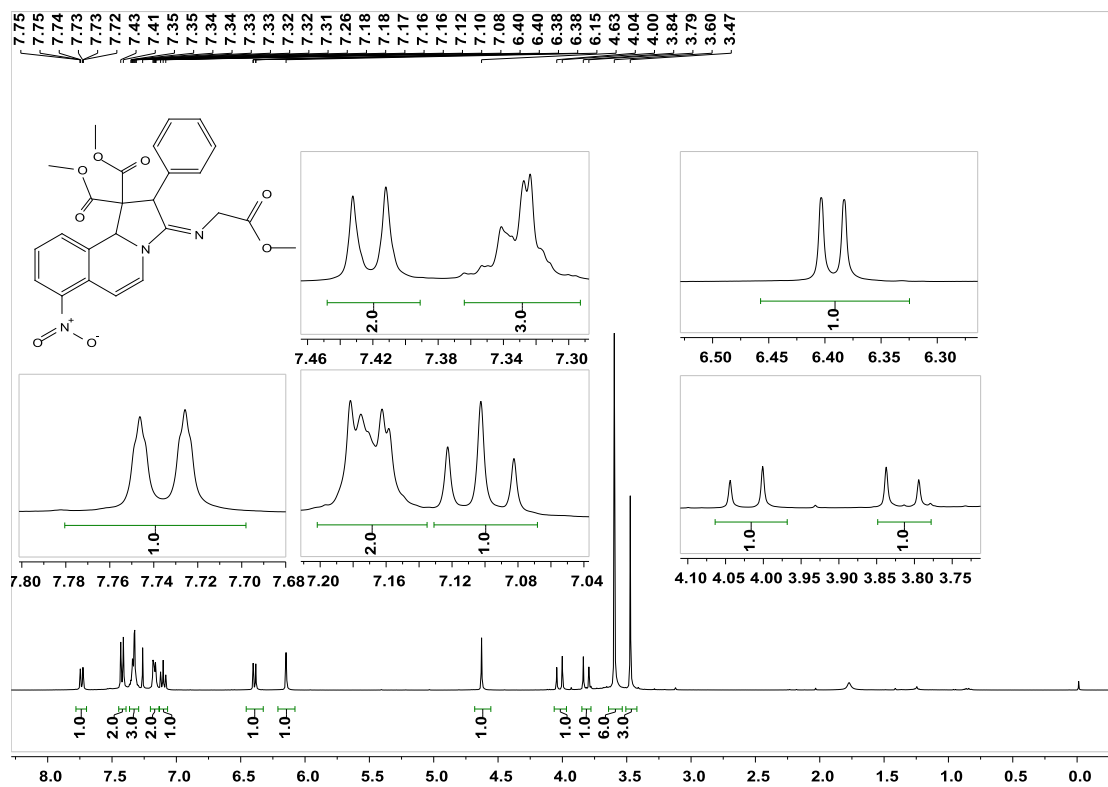

Supplementary Figure 165. <sup>1</sup>H NMR spectra for product 8s

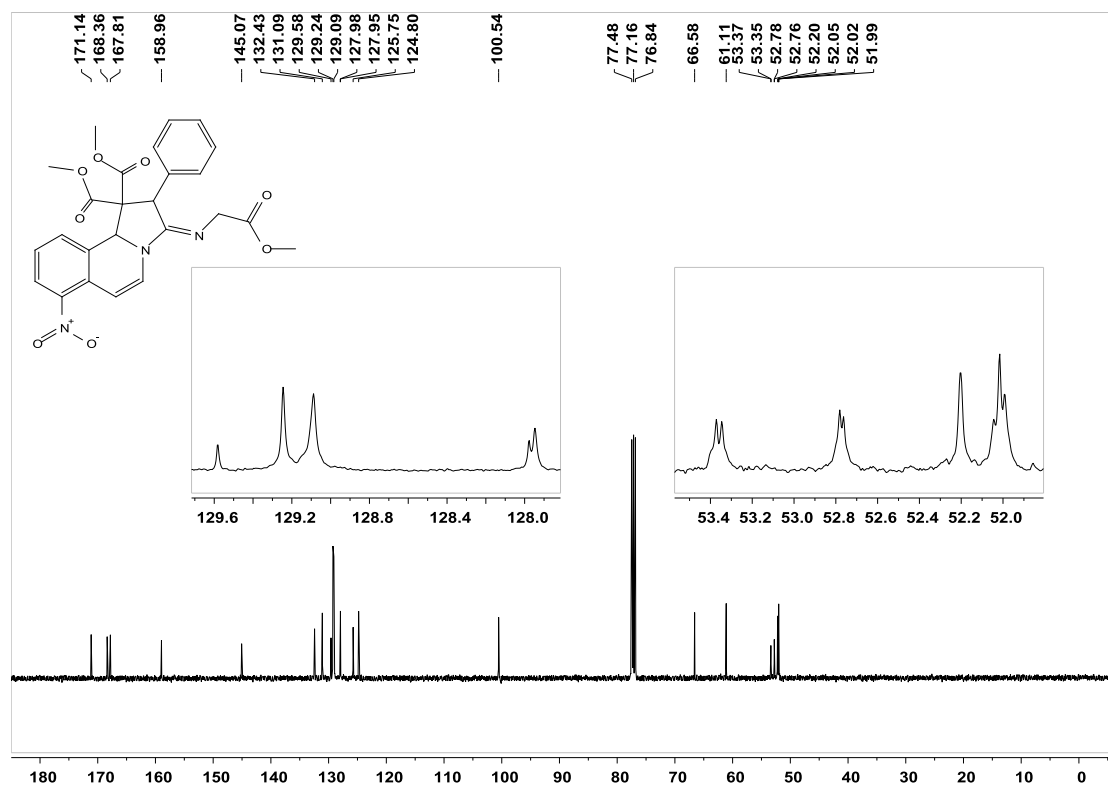

Supplementary Figure 166. <sup>13</sup>C NMR spectra for product 8s

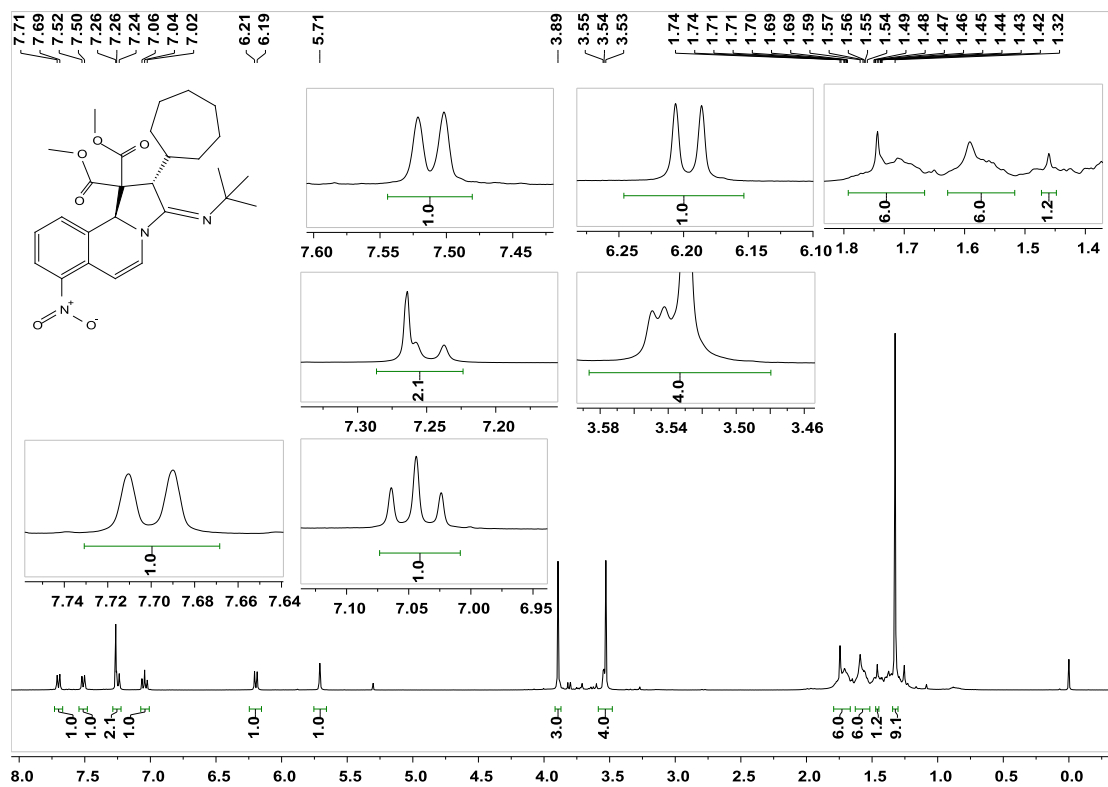

**Supplementary Figure 167.  $^1\text{H}$  NMR spectra for product **8t****

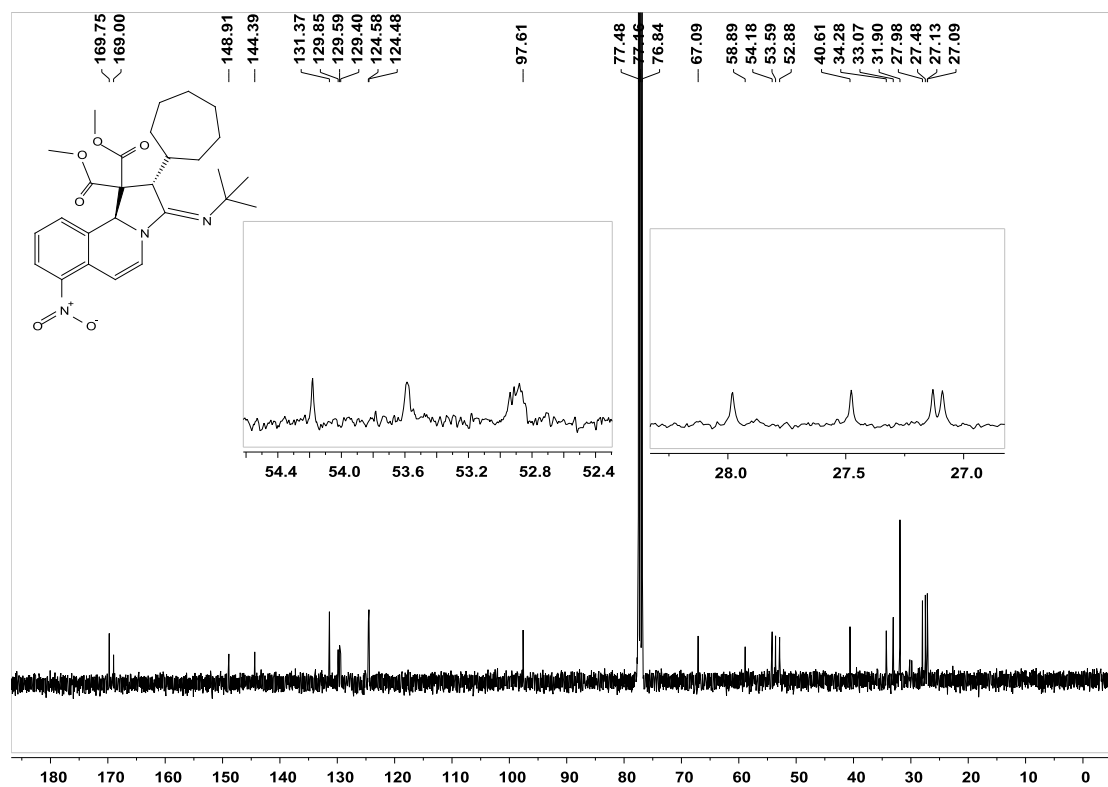

**Supplementary Figure 168.  $^{13}\text{C}$  NMR spectra for product **8t****

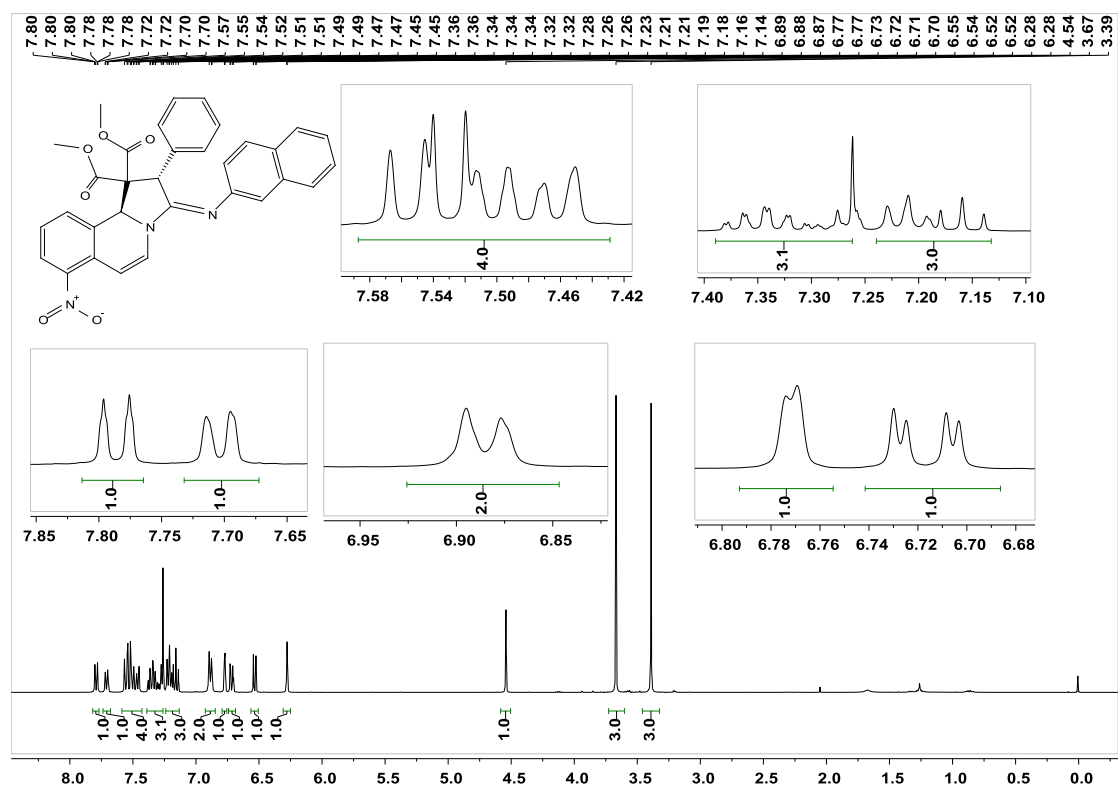

Supplementary Figure 169. <sup>1</sup>H NMR spectra for product **8u**

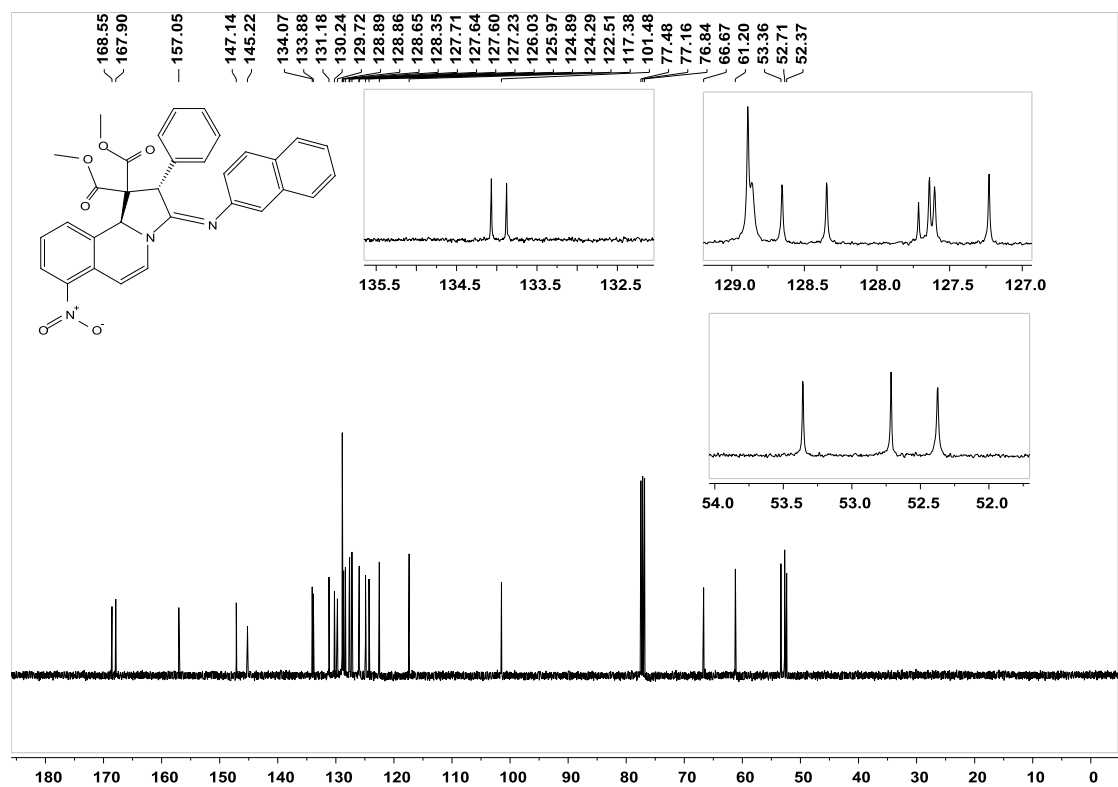

Supplementary Figure 170. <sup>13</sup>C NMR spectra for product **8u**



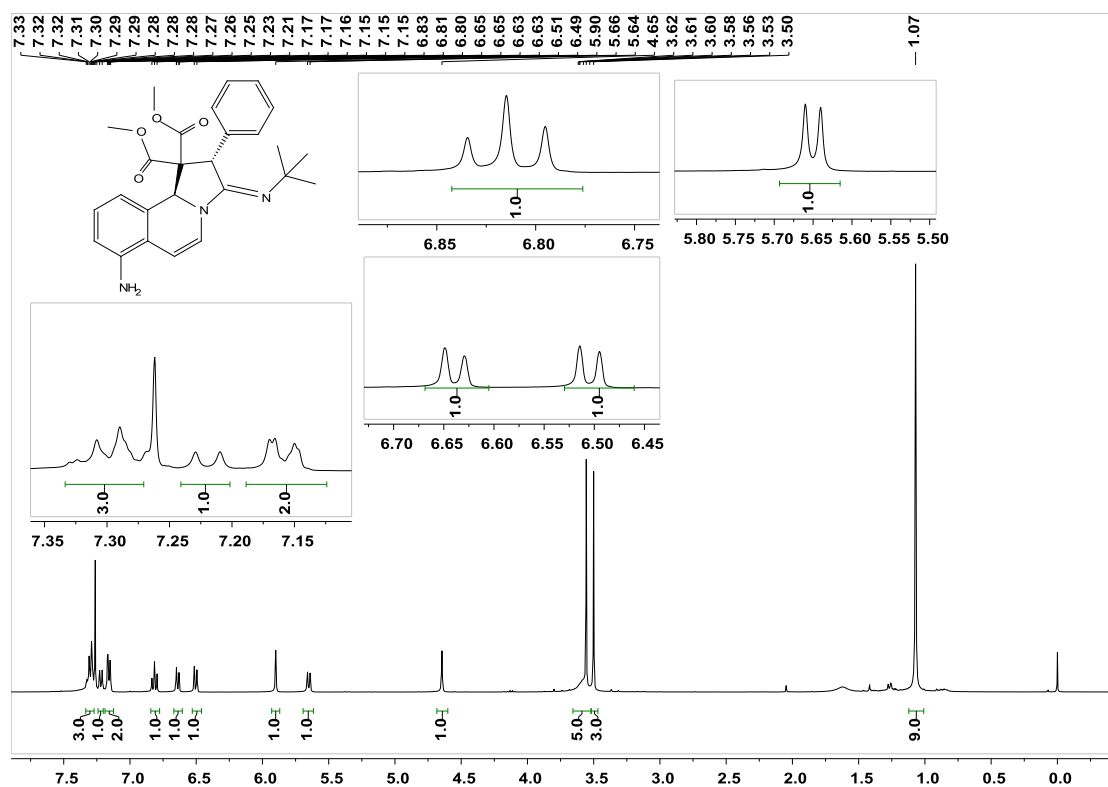

**Supplementary Figure 171.  $^1\text{H}$  NMR spectra for product **8v****

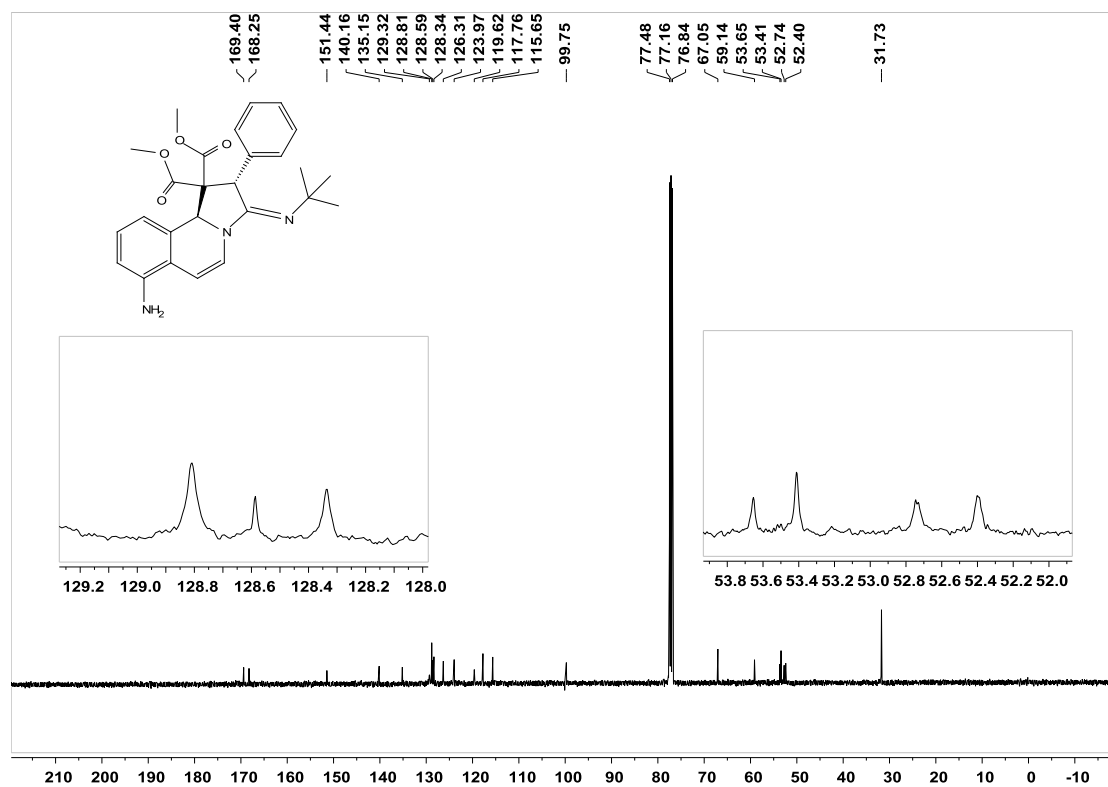

**Supplementary Figure 172.  $^{13}\text{C}$  NMR spectra for product **8v****

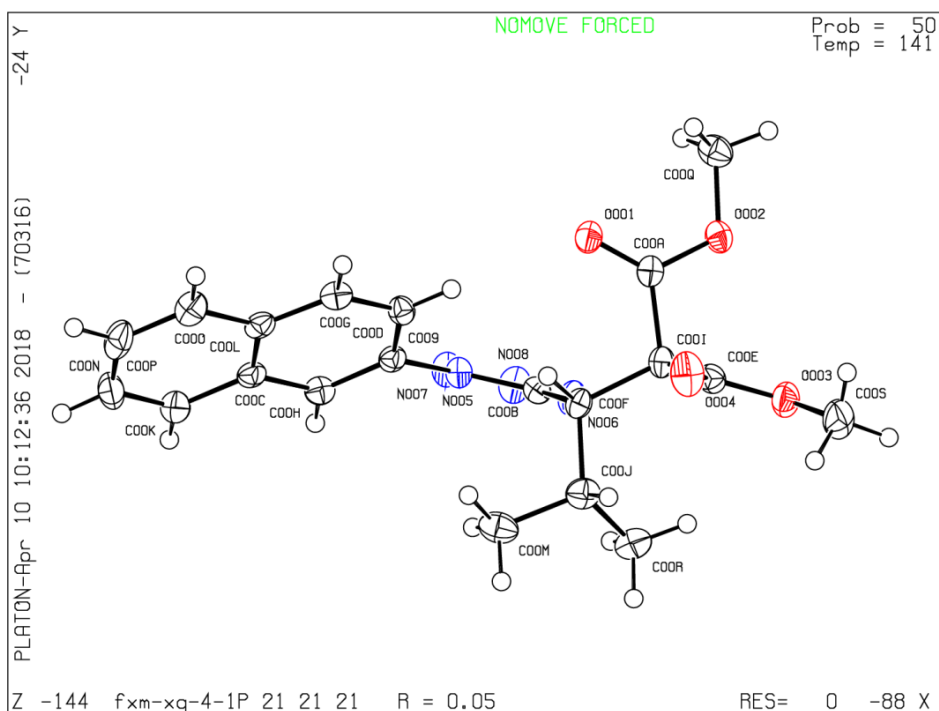

**Supplementary Figure 173. ORTEP drawing of 4i**

**Supplementary Table 12. Crystal data and structure refinement for 4i**

|                                    |                                                               |
|------------------------------------|---------------------------------------------------------------|
| Empirical formula                  | C <sub>20</sub> H <sub>22</sub> N <sub>4</sub> O <sub>4</sub> |
| Formula weight                     | 382.41                                                        |
| Temperature/K                      | 141.00(10)                                                    |
| Crystal system                     | orthorhombic                                                  |
| Space group                        | P2 <sub>1</sub> 2 <sub>1</sub> 2 <sub>1</sub>                 |
| a/Å                                | 8.5315(2)                                                     |
| b/Å                                | 8.95968(18)                                                   |
| c/Å                                | 24.5736(6)                                                    |
| α/°                                | 90                                                            |
| β/°                                | 90                                                            |
| γ/°                                | 90                                                            |
| Volume/Å <sup>3</sup>              | 1878.39(8)                                                    |
| Z                                  | 4                                                             |
| ρ <sub>calc</sub> /cm <sup>3</sup> | 1.352                                                         |
| μ/mm <sup>-1</sup>                 | 0.792                                                         |
| F(000)                             | 808.0                                                         |
| Crystal size/mm <sup>3</sup>       | 0.6 × 0.3 × 0.2                                               |
| Radiation                          | CuKα (λ = 1.54184)                                            |
| 2θ range for data collection/°     | 7.194 to 130.094                                              |
| Index ranges                       | -10 ≤ h ≤ 8, -7 ≤ k ≤ 10, -28 ≤ l ≤ 24                        |
| Reflections collected              | 9525                                                          |
| Independent reflections            | 3199 [R <sub>int</sub> = 0.0414, R <sub>sigma</sub> = 0.0400] |

Data/restraints/parameters 3199/0/257  
 Goodness-of-fit on  $F^2$  1.031  
 Final R indexes [ $I > 2\sigma(I)$ ]  $R_1 = 0.0492$ ,  $wR_2 = 0.1262$   
 Final R indexes [all data]  $R_1 = 0.0542$ ,  $wR_2 = 0.1309$   
 Largest diff. peak/hole /  $e \text{ \AA}^{-3}$  0.21/-0.27  
 Flack parameter 0.04(16)

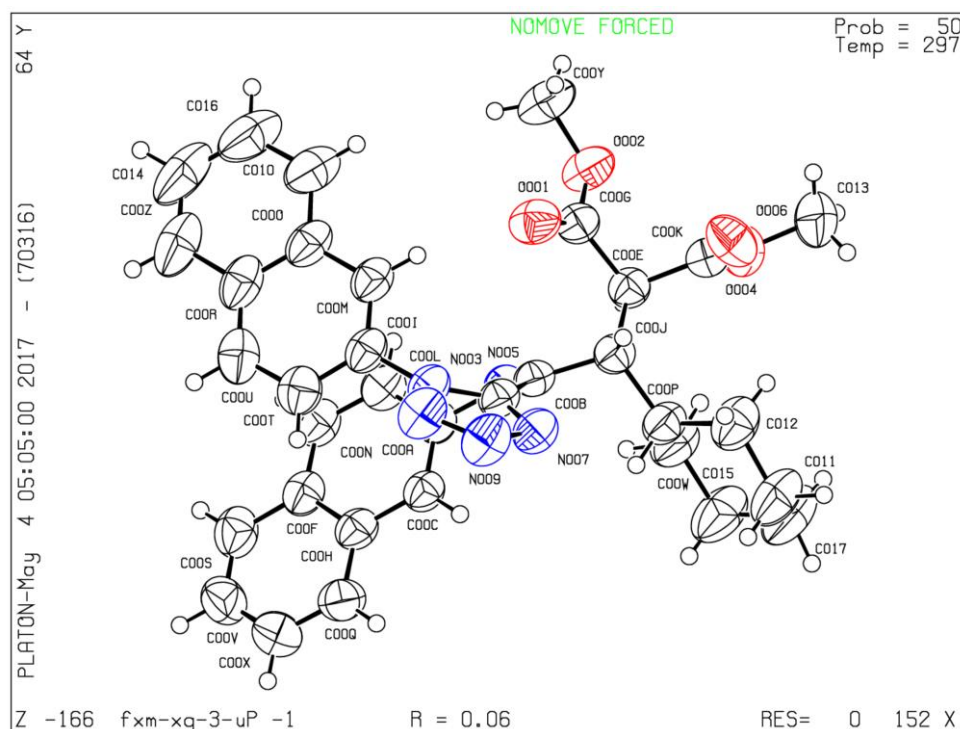

**Supplementary Figure 174.** ORTEP drawing of **5a**

**Supplementary Table 13.** Crystal data and structure refinement for **5a**

|                                  |                      |
|----------------------------------|----------------------|
| Identification code              | fxm-xq-3-up          |
| Empirical formula                | $C_{34}H_{33}N_5O_4$ |
| Formula weight                   | 575.65               |
| Temperature/K                    | 296.6(5)             |
| Crystal system                   | triclinic            |
| Space group                      | P-1                  |
| $a/\text{\AA}$                   | 10.2260(4)           |
| $b/\text{\AA}$                   | 12.3951(5)           |
| $c/\text{\AA}$                   | 13.4645(6)           |
| $\alpha/^\circ$                  | 65.391(4)            |
| $\beta/^\circ$                   | 77.344(4)            |
| $\gamma/^\circ$                  | 80.504(3)            |
| Volume/ $\text{\AA}^3$           | 1508.69(12)          |
| Z                                | 2                    |
| $\rho_{\text{calc}}/\text{cm}^3$ | 1.267                |

|                                                |                                                               |
|------------------------------------------------|---------------------------------------------------------------|
| $\mu/\text{mm}^{-1}$                           | 0.684                                                         |
| F(000)                                         | 608.0                                                         |
| Crystal size/ $\text{mm}^3$                    | $0.6 \times 0.4 \times 0.15$                                  |
| Radiation                                      | CuK $\alpha$ ( $\lambda = 1.54184$ )                          |
| 2 $\theta$ range for data collection/°         | 11.386 to 145.288                                             |
| Index ranges                                   | $-12 \leq h \leq 12, -12 \leq k \leq 15, -13 \leq l \leq 16$  |
| Reflections collected                          | 16498                                                         |
| Independent reflections                        | 5850 [ $R_{\text{int}} = 0.0256, R_{\text{sigma}} = 0.0213$ ] |
| Data/restraints/parameters                     | 5850/0/390                                                    |
| Goodness-of-fit on $F^2$                       | 1.038                                                         |
| Final R indexes [ $I \geq 2\sigma(I)$ ]        | $R_1 = 0.0637, wR_2 = 0.1893$                                 |
| Final R indexes [all data]                     | $R_1 = 0.0748, wR_2 = 0.2049$                                 |
| Largest diff. peak/hole / $e \text{ \AA}^{-3}$ | 0.53/-0.23                                                    |

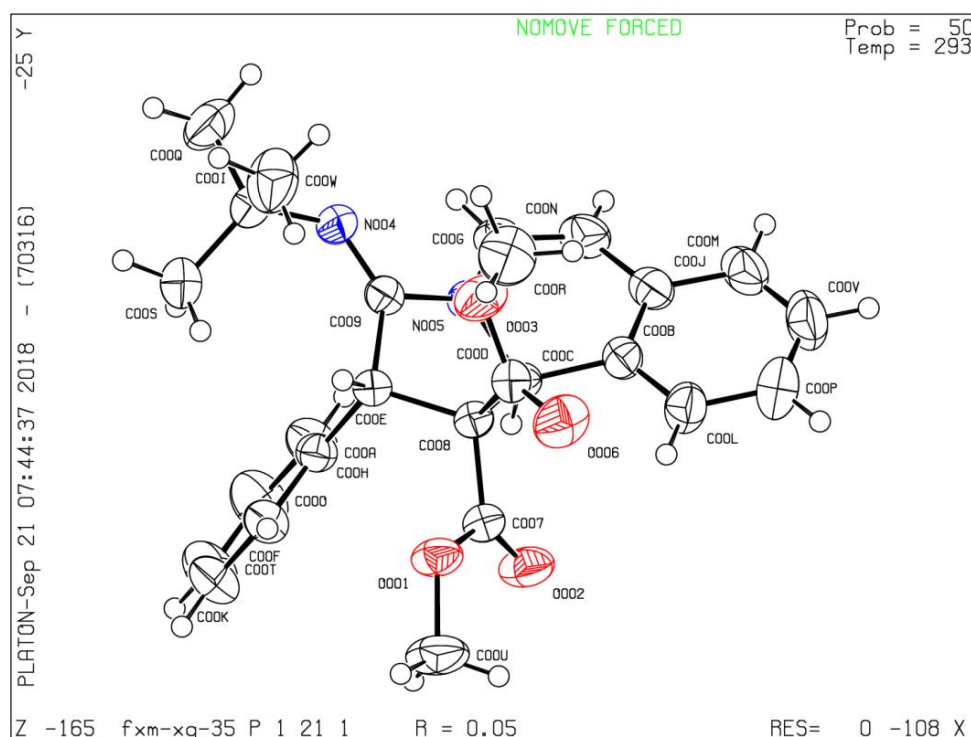

**Supplementary Figure 175. ORTEP drawing of 8a**

**Supplementary Table 14. Crystal data and structure refinement for 8a**

|                     |                                                  |
|---------------------|--------------------------------------------------|
| Identification code | fxm-xq-35                                        |
| Empirical formula   | $\text{C}_{26}\text{H}_{28}\text{N}_2\text{O}_4$ |
| Formula weight      | 432.50                                           |
| Temperature/K       | 293.01(10)                                       |
| Crystal system      | monoclinic                                       |
| Space group         | $P2_1$                                           |
| $a/\text{\AA}$      | 9.6898(5)                                        |
| $b/\text{\AA}$      | 8.0279(5)                                        |

|                                                |                                                               |
|------------------------------------------------|---------------------------------------------------------------|
| $c/\text{\AA}$                                 | 14.9828(8)                                                    |
| $\alpha/^\circ$                                | 90                                                            |
| $\beta/^\circ$                                 | 97.027(5)                                                     |
| $\gamma/^\circ$                                | 90                                                            |
| Volume/ $\text{\AA}^3$                         | 1156.75(12)                                                   |
| Z                                              | 2                                                             |
| $\rho_{\text{calc}}/\text{g/cm}^3$             | 1.242                                                         |
| $\mu/\text{mm}^{-1}$                           | 0.677                                                         |
| F(000)                                         | 460.0                                                         |
| Crystal size/ $\text{mm}^3$                    | $0.7 \times 0.4 \times 0.2$                                   |
| Radiation                                      | CuK $\alpha$ ( $\lambda = 1.54184$ )                          |
| 2 $\Theta$ range for data collection/ $^\circ$ | 9.196 to 145.778                                              |
| Index ranges                                   | $-11 \leq h \leq 11, -8 \leq k \leq 9, -16 \leq l \leq 18$    |
| Reflections collected                          | 11806                                                         |
| Independent reflections                        | 4045 [ $R_{\text{int}} = 0.0326, R_{\text{sigma}} = 0.0291$ ] |
| Data/restraints/parameters                     | 4045/1/294                                                    |
| Goodness-of-fit on $F^2$                       | 1.056                                                         |
| Final R indexes [ $I \geq 2\sigma(I)$ ]        | $R_1 = 0.0516, wR_2 = 0.1294$                                 |
| Final R indexes [all data]                     | $R_1 = 0.0531, wR_2 = 0.1326$                                 |
| Largest diff. peak/hole / $e \text{\AA}^{-3}$  | 0.19/-0.32                                                    |
| Flack parameter                                | 0.01(13)                                                      |

## Supplementary References

1. Wen, Y. H., Huang, X., Huang, J. L., Xiong, Y., B. Qin & Feng, X. M. Asymmetric cyanosilylation of aldehydes catalyzed by novel organocatalysts. *Synlett*. 2445–2448 (2005).
2. Yu, Z. P., Liu, X. H., Dong, Z. H., Xie, M. S. & Feng, X. M. An  $N,N'$ -dioxide/ $\text{In}(\text{OTf})_3$  catalyst for the asymmetric hetero-Diels–Alder reaction between danishefsky's dienes and aldehydes: application in the total synthesis of Triketide. *Angew. Chem. Int. Ed.* **47**, 1308–1311 (2008).
3. Wang, J., Zhou, Y., Zhang, L., Li, Z., Chen, X. & Liu, H. Asymmetric Michael addition of  $N$ -tert-butanefulfinyl imidate with  $\alpha,\beta$ -unsaturated diesters: scope and application to the synthesis of indanone derivatives. *Org. Lett.* **15**, 1508–1511 (2013).
4. Guan, Y., Attard, J. W., Visco, M. D., Fisher, T. J. & Mattson, A. E. Enantioselective catalyst systems from Copper(II) triflate and BINOL–Silanediol. *Chem. Eur. J.* **24**, 7123 – 7127 (2018).
5. Hu, D. X., Grice, P. & Ley, T. V. Rotamers or diastereomers? An overlooked NMR solution. *J. Org. Chem.* **77**, 5198-5202 (2012).
6. Alix, A., Lalli, C., Retailleau, P. & Masson, G. Highly enantioselective electrophilic  $\alpha$ -bromination of enecarbamates: chiral phosphoric acid and calcium phosphate salt catalysts. *J. Am. Chem. Soc.* **134**, 10389-10392 (2012).
